# Supplementary material for: Immune phenotype in high- versus low-NRF2 high grade serous ovarian cancer and the impact on prognosis
Source: Research Square preprint supplement (doi:10.21203/rs.3.rs-6925656/v1), 2025-07-22
Supplement: Supplementary file 1 [file 36331ca989fa9489587ef692.pdf]

## **Supplementary Figures**

### **Immune phenotype in high- versus low-NRF2 high grade serous ovarian cancer and the impact on prognosis**

Samera H. Hamad<sup>1,2,3\*</sup>, Chelsea Katz<sup>1#</sup>, Helen Toma<sup>1#</sup>, Kosuke Murakami<sup>4,5</sup>, Nasrine Bendjilali<sup>6</sup>, Gord Zhu<sup>1,3</sup>, Hadi Shojaei<sup>1,3</sup>, Lanlan Fang<sup>7,8</sup>, Samuel Leung<sup>7,8</sup>, Martin Koebel<sup>9</sup>, Huseyin Karaduman<sup>10</sup>, Oliver Abinader<sup>11</sup>, Ramkrishna Mitra<sup>11</sup>, Lauren Krill<sup>1,2,3</sup>, Christina Chu<sup>1,2,3</sup>, David P. Warshal<sup>1,2,3</sup>, Yemin Wang<sup>7,8</sup>

<sup>1</sup>Department of Surgery, Cooper University Health Care, Camden, New Jersey, United States.

<sup>2</sup>Department of Surgery, Cooper Medical School of Rowan University, Camden, New Jersey, United States.

<sup>3</sup>MD Anderson Cancer Center at Cooper, Camden, New Jersey, United States.

<sup>4</sup>Department of Obstetrics and Gynecology, Kindai University Faculty of Medicine, Osaka, Japan

<sup>5</sup>The Bloomberg-Kimmel Institute for Cancer Immunotherapy, Johns Hopkins University, Baltimore, Maryland, United States.

<sup>6</sup>College of Science and Mathematics, Rowan University, Glassboro, New Jersey, United States.

<sup>7</sup>Department of Pathology and Laboratory Medicine, University of British Columbia, Vancouver, BC, Canada

<sup>8</sup>Ovarian Cancer Research Centre, Vancouver Coastal Health Research Institute, BC, Canada

<sup>9</sup>Department of Pathology, University of Calgary, Calgary, AB, Canada

<sup>10</sup>North Carolina State University, Raleigh, North Carolina, United States.

<sup>11</sup>Division of Biostatistics and Bioinformatics, Department of Pharmacology, Physiology, and Cancer Biology, Thomas Jefferson University, Philadelphia, PA, United States.

**# Equally contributed to this work**

**\*To whom the correspondence should be addressed**

Samera Hamad, PhD: Cooper Medical School of Rowan University, Camden, NJ 08103, United States. Email. [hamad@rown.edu](mailto:hamad@rown.edu) or [samera3h@gmail.com](mailto:samera3h@gmail.com), Ph. 608-217-3839

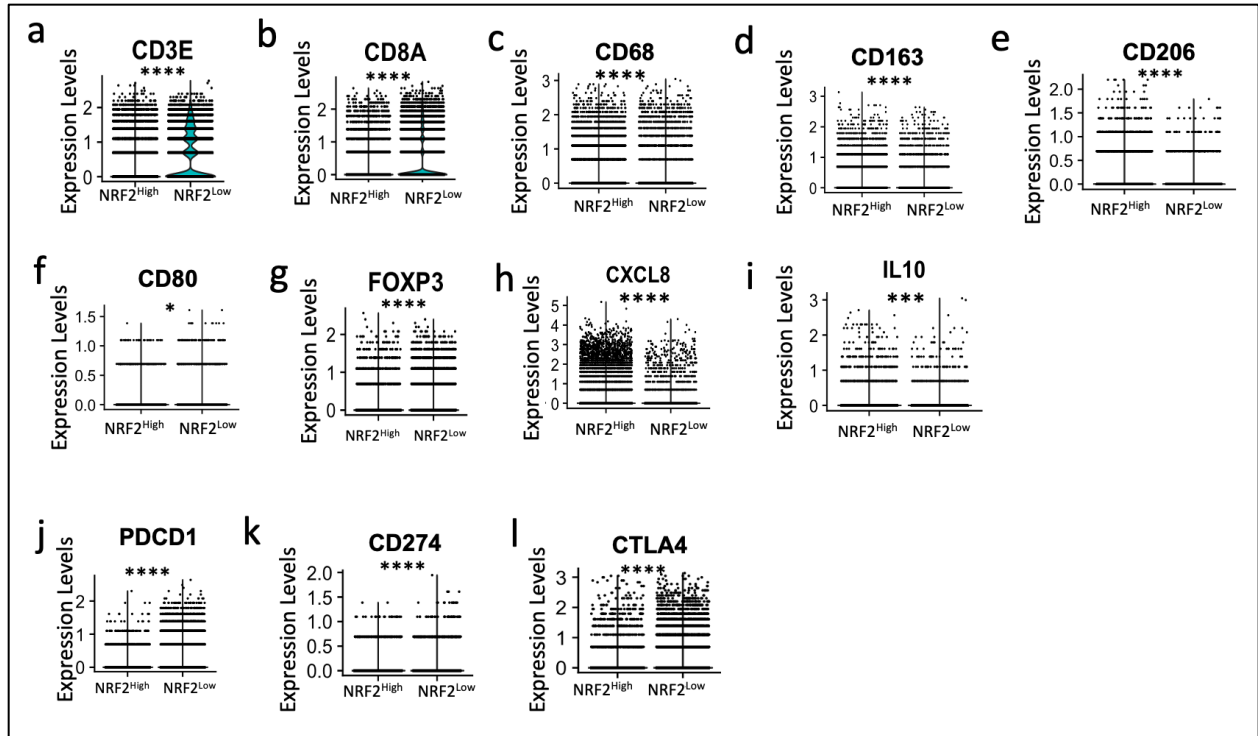

**Supplementary Figure 1. Single cell RNA-seq data analysis of 7 human HGSOC tumor samples show different immune markers and checkpoints in high (n=4) versus low (n=3) NRF2 HGSOC. a-b** Expression levels of T-cell markers (CD3E and CD8A), **c-f** Expression levels of macrophages markers (CD68, CD163, CD206, and CD80), **h-i** Expression levels of cytokines and chemokines, and **j-l** Expression levels of immune checkpoints in high versus low NRF2 samples, \*P<0.05, \*\*\*P<0.001, \*\*\*\*P<0.0001.

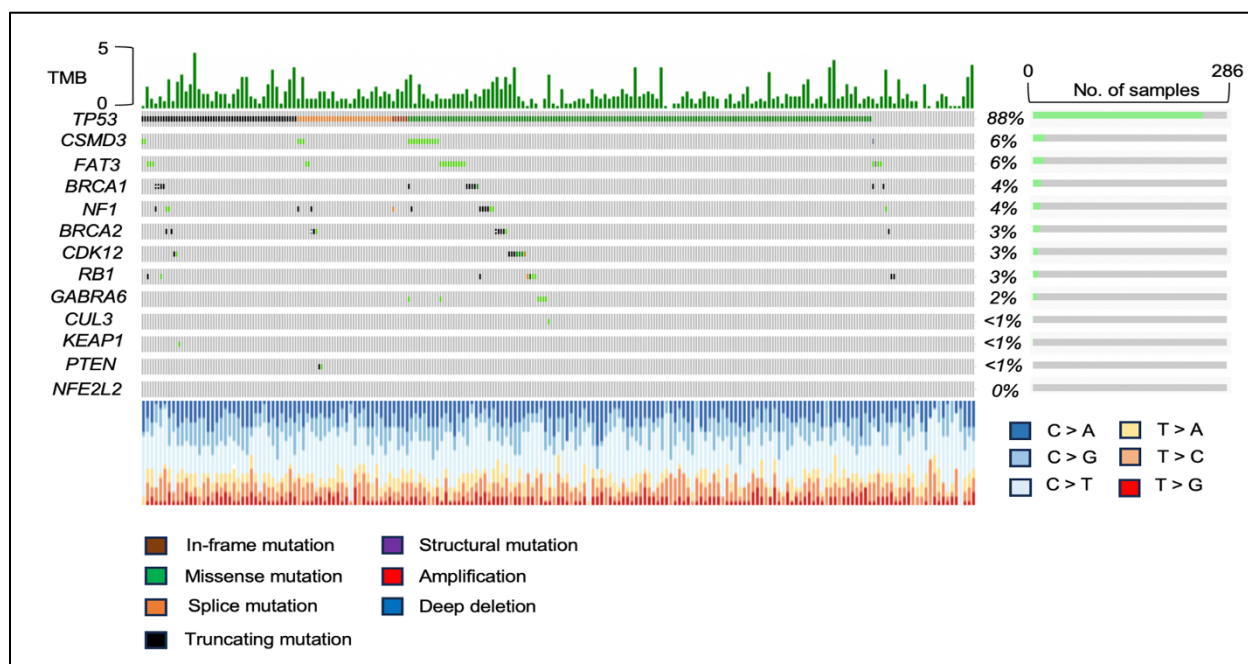

**Supplementary Figure 2. RNA-seq data analysis of HGSOC tumor samples from TCGA.** Major mutations in n=365 HGSOC tumor samples among which mutations in the queried genes were observed in n=286 samples. KEAP1-NRF2 pathways shows no mutations in this set of samples.

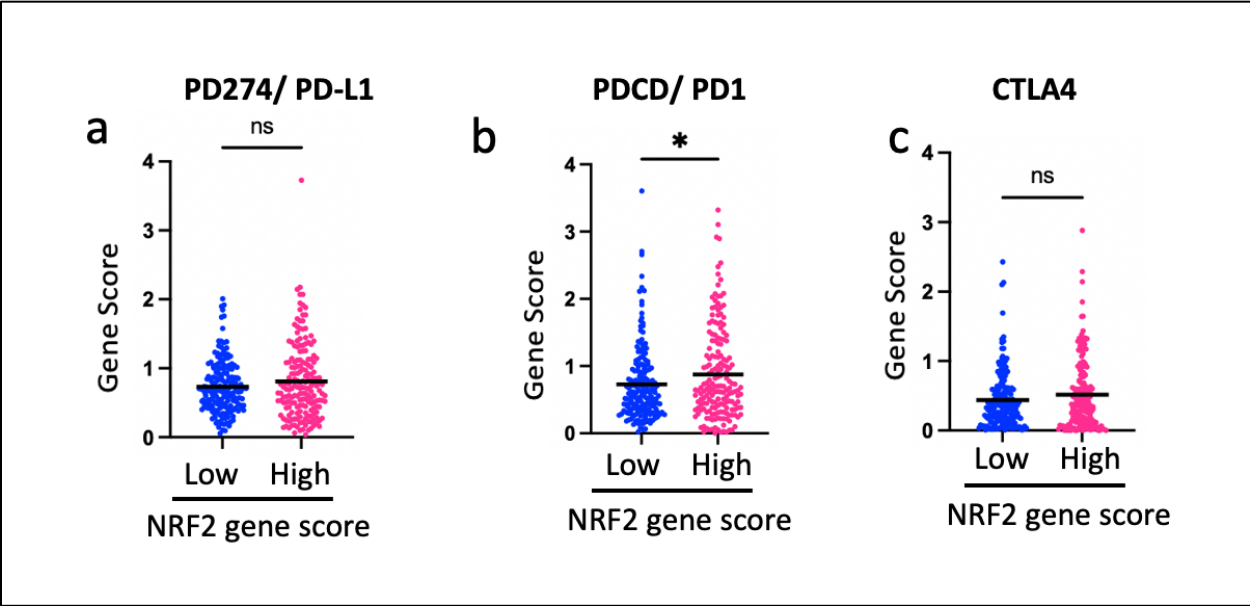

**Supplementary Figure 3. Higher expression of PD1 in high NRF2 HGSOC compared to NRF2 low tumors.** **a** No changes in expression levels of PD-L1 in high versus low NRF2 HGSOC, **b** significantly higher expression levels in PD1 in high compared to low NRF2 HGSOC, with **c** no significant changes in expression levels of CTLA4 in high versus low NRF2 HGSOC.

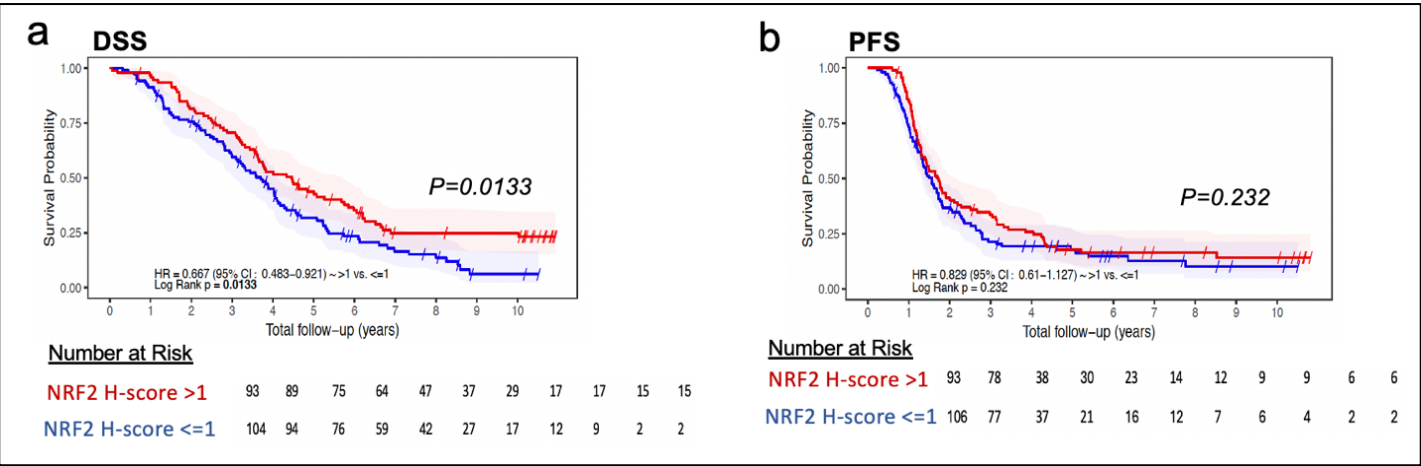

**Supplementary Figure 4.** Survival of HGSOC patient samples with NRF2<sup>High</sup> (H-score >1) and NRF2<sup>Low</sup> (H-score <=1) HGSOC. **a** Significantly higher disease-specific survival (DSS) of patients with NRF2<sup>High</sup> HGSOC compared to patients with NRF2<sup>Low</sup> HGSOC, but **b** no significant change in progression-free survival (PFS) between patients with NRF2<sup>High</sup> and those with NRF2<sup>Low</sup> tumors.
