# Supplementary material for: Immune phenotype in high- versus low-NRF2 high grade serous ovarian cancer and the impact on prognosis
Source: Research Square preprint supplement (doi:10.21203/rs.3.rs-6925656/v1), 2025-07-22
Supplement: Supplementary file 1 [file f2db55b8b9ef405c50f8d31d.xlsx]

## Sheet: Supplementary Table 1
Supplementary Table 1. Immune cell differentation and pathway analysis of scRNA-seq data of 7 human HGSOC tumors
	orig.ident	nCount_RNA	nFeature_RNA	percent.mt	nCount_SCT	nFeature_SCT	SCT_snn_res.0.2	seurat_clusters	pANN_0.25_0.13_274	DF.classifications_0.25_0.13_274	sample	singleR.labels	cluster_anno	NRF2_signature	HALLMARK_ADIPOGENESIS	HALLMARK_ALLOGRAFT_REJECTION	HALLMARK_ANDROGEN_RESPONSE	HALLMARK_ANGIOGENESIS	HALLMARK_APICAL_JUNCTION	HALLMARK_APICAL_SURFACE	HALLMARK_APOPTOSIS	HALLMARK_BILE_ACID_METABOLISM	HALLMARK_CHOLESTEROL_HOMEOSTASIS	HALLMARK_COAGULATION	HALLMARK_COMPLEMENT	HALLMARK_DNA_REPAIR	HALLMARK_E2F_TARGETS	HALLMARK_EPITHELIAL_MESENCHYMAL_TRANSITION	HALLMARK_ESTROGEN_RESPONSE_EARLY	HALLMARK_ESTROGEN_RESPONSE_LATE	HALLMARK_FATTY_ACID_METABOLISM	HALLMARK_G2M_CHECKPOINT	HALLMARK_GLYCOLYSIS	HALLMARK_HEDGEHOG_SIGNALING	HALLMARK_HEME_METABOLISM	HALLMARK_HYPOXIA	HALLMARK_IL2_STAT5_SIGNALING	HALLMARK_IL6_JAK_STAT3_SIGNALING	HALLMARK_INFLAMMATORY_RESPONSE	HALLMARK_INTERFERON_ALPHA_RESPONSE	HALLMARK_INTERFERON_GAMMA_RESPONSE	HALLMARK_KRAS_SIGNALING_DN	HALLMARK_KRAS_SIGNALING_UP	HALLMARK_MITOTIC_SPINDLE	HALLMARK_MTORC1_SIGNALING	HALLMARK_MYC_TARGETS_V1	HALLMARK_MYC_TARGETS_V2	HALLMARK_MYOGENESIS	HALLMARK_NOTCH_SIGNALING
AAACCCAAGTATAGGT-1_1	Cancer_HGSOC1	4528	1744	5.47703	NA	NA	2	2	0.229885	Singlet	Tumor	T_cells	CD4T	-1.4715	-0.36985	0.455624	-0.440258	-0.723456	-0.172081	0.1525	0.0362855	-0.772367	-0.763776	-0.553299	-0.0680526	-0.616248	-0.399142	-0.367115	-0.661222	-0.630254	-0.368113	-0.486236	0.00146914	-0.34734	-0.390411	-0.101131	1.15414	0.992245	0.544046	0.768637	0.467277	0.117827	0.10519	-0.197787	-0.365463	-0.154263	-0.9225	-0.105223	-0.386831
AAACCCACACCATAAC-1_1	Cancer_HGSOC1	31254	6009	12.7984	NA	NA	0	0	0.303271	Singlet	Tumor	Epithelial_cells	epithelial	0.174441	1.56386	-1.14207	1.70017	0.866243	1.05471	1.7261	1.70907	-0.261999	2.07248	-0.10686	0.301739	0.985878	1.28495	0.104032	2.16276	1.92093	1.02615	1.45888	1.02402	0.278941	1.52663	1.19052	-0.18889	0.585358	-0.038432	0.622259	0.537167	-0.393343	-1.32871	1.73054	1.09532	1.36957	1.22162	1.32433	1.49418
AAACCCACAGCTGCCA-1_1	Cancer_HGSOC1	9374	2655	15.9804	NA	NA	1	1	0.275862	Singlet	Tumor	Macrophage	myeloid	1.41111	0.0557704	0.279899	-0.0958676	-0.897759	-0.123097	0.556022	0.45415	-0.0428842	0.214472	0.783748	0.667782	-0.577992	-0.0962805	-0.165539	0.125211	-0.148752	0.29415	0.102447	-0.70596	-0.293648	0.471431	0.667408	-0.27807	1.90809	1.34524	0.59217	0.44184	0.0227091	2.39197	0.502164	-0.127942	-0.414808	-0.479777	0.271718	1.69682
AAACCCACATAACAGA-1_1	Cancer_HGSOC1	4304	1728	9.22398	NA	NA	3	3	0.173298	Singlet	Tumor	NK_cell	NK	-0.0208225	-0.200462	0.945062	-0.265029	-0.367543	-0.0905501	0.745095	-0.748143	0.0612696	-0.225169	-0.534105	-0.147663	-0.740569	-0.433074	-0.334184	-0.612575	-0.755814	-0.851076	-0.349917	-0.778581	0.485103	-0.386259	-0.172982	0.0268517	-0.486288	-0.019232	-0.624892	-0.187072	0.410964	0.549554	-0.379087	0.0452869	-0.366003	-0.721921	-0.0835265	-1.0695
AAACCCACATTGCTGA-1_1	Cancer_HGSOC1	865	566	16.8786	NA	NA	4	4	0.212202	Singlet	Tumor	NK_cell	T	-0.291536	-1.13312	-0.71603	-1.19827	-0.0722628	-0.611324	-0.643522	-1.00303	-0.720049	-0.615919	-0.202643	-0.59504	-1.03533	-0.952016	-0.443753	-0.569815	-0.85142	-1.17111	-0.899623	-1.15235	0.503135	-0.676626	-0.953587	-1.16564	-1.24799	-0.823944	-1.66356	-1.27356	0.887908	-0.53342	-0.775016	-1.42769	-1.57619	-0.713728	-0.403592	-0.595048
AAACCCAGTGAATGTA-1_1	Cancer_HGSOC1	7996	2602	23.2741	NA	NA	0	0	0.305924	Singlet	Tumor	Epithelial_cells	epithelial	2.17785	-0.043549	-1.0824	0.462592	0.69064	1.0901	1.25252	0.191046	0.28841	0.286788	0.982098	-0.759651	-0.530335	-0.744484	0.960157	1.23088	0.642513	-0.393596	-0.287955	0.282258	3.31987	0.696292	0.283603	0.235368	0.198198	0.6858	-0.881151	-0.476202	0.909048	0.159734	0.560881	0.108161	-0.567081	-0.0863039	1.63777	0.750542
AAACCCAGTTTGGGTT-1_1	Cancer_HGSOC1	1456	762	16.5522	NA	NA	4	4	0.198055	Singlet	Tumor	T_cells	T	-0.0175034	-1.27487	-1.06935	-1.19259	-0.773422	-1.25475	-0.962554	-0.838983	-0.126168	-1.20274	-0.778632	-1.3533	-1.17971	-0.999916	-0.525981	-0.749085	-0.992192	-1.06177	-1.04126	-0.854022	-0.434907	-0.578726	-1.15221	-1.00831	-1.11883	-1.13177	-0.717031	-0.735631	0.72559	-1.08605	-0.306133	-1.45168	-1.57453	-0.855176	-0.396	-0.967641
AAACCCATCAACGCTA-1_1	Cancer_HGSOC1	4654	1969	5.13537	NA	NA	5	5	0.207781	Singlet	Tumor	T_cells	CD8T	1.12043	-0.340015	0.862818	-0.653699	-1.20667	-0.221365	-0.656966	-0.407862	-0.74223	-0.589296	-0.717875	-0.949559	-0.473433	-0.442574	-0.437788	-0.153654	-0.538929	-0.587867	-0.281742	-0.489533	-1.10405	-0.288778	0.168943	-0.233075	-0.352731	-0.285164	-0.829943	-0.549848	-0.00958085	0.302773	-0.462311	-0.442713	-0.108559	-0.67732	-0.594556	-0.711277
AAACCCATCGGCTGTG-1_1	Cancer_HGSOC1	10213	2683	1.35122	NA	NA	0	0	0.261715	Singlet	Tumor	Epithelial_cells	epithelial	-1.12458	-0.55538	-1.10883	0.272734	-0.613082	0.590591	-0.0972979	0.183878	-0.0691254	1.10538	0.332188	0.0558832	-0.468911	-0.255603	0.451892	0.845684	0.38143	-0.173299	-0.396219	-0.550524	0.432249	0.634429	0.00336718	-0.348616	0.0757939	0.213074	-0.064009	0.010181	1.18398	-0.882154	0.350369	-0.0561172	-0.815955	-0.517826	1.22402	-0.143675
AAACCCATCTGAGCAT-1_1	Cancer_HGSOC1	3171	1657	7.03248	NA	NA	5	5	0.226348	Singlet	Tumor	T_cells	CD8T	-1.38953	-0.471349	0.93735	0.210007	-0.459515	-0.172247	-1.16102	-0.60297	-0.539265	-0.587273	-0.814073	-0.324063	-0.451525	-0.518413	-0.530654	-0.69025	0.0508779	-0.433706	-0.731097	-0.645835	0.132408	-0.821851	-0.795118	-0.222547	-1.17507	-0.830214	-0.414015	-0.339962	0.279975	-0.489056	-0.12413	-0.660814	-0.725038	-0.41497	-0.302327	-0.71738
AAACGAACAAATGGTA-1_1	Cancer_HGSOC1	5514	2193	9.84766	NA	NA	3	3	0.206012	Singlet	Tumor	NK_cell	NK	-0.977973	-0.319944	0.652061	-0.442433	0.301072	-0.193832	1.6215	0.0266486	1.43783	0.0495489	-0.575785	0.361085	-0.662323	-0.462188	-0.625752	-0.221893	-0.346215	-0.663404	-0.386075	-0.534898	-0.771071	-0.630516	-0.621665	0.253183	-0.924453	-0.563907	-0.614345	-0.461851	0.406862	-0.223972	-0.115613	-0.142207	-0.211017	-0.365052	-0.421105	0.360856
AAACGAACACGTACTA-1_1	Cancer_HGSOC1	22937	4887	19.4576	NA	NA	0	0	0.32626	Singlet	Tumor	Epithelial_cells	epithelial	2.77278	1.1897	-0.31175	1.17547	0.557907	2.32339	1.99339	1.13619	-0.854327	1.5578	1.14804	0.925296	1.12357	0.733951	-0.0422041	2.81039	1.86	0.911831	0.991022	1.84608	0.640365	1.86522	1.60587	0.85051	0.481285	0.111468	0.0397628	0.126181	0.457867	-0.225358	1.64432	1.21023	0.512349	0.483939	1.19752	0.53337
AAACGAACAGTAGTGG-1_1	Cancer_HGSOC1	3020	1206	13.8079	NA	NA	1	1	0.305924	Singlet	Tumor	Monocyte	myeloid	0.545053	-0.657694	-0.612454	-1.04293	-0.902334	-1.05111	-0.462569	-0.640256	0.280088	-0.595538	0.190133	-0.838007	-1.09761	-0.860946	-0.511617	-0.329098	-0.526885	-0.468333	-0.994715	-0.851347	-0.423935	-0.0323116	-0.348061	-0.391181	-0.649312	0.385577	-1.18739	-0.555491	0.585861	0.844288	-0.733766	-0.945581	-0.961437	-0.661802	-0.279187	0.172358
AAACGAAGTGTCTAAC-1_1	Cancer_HGSOC1	10929	3431	19.9744	NA	NA	6	6	0.226348	Singlet	Tumor	Tissue_stem_cells	mesenchymal	0.624699	0.0205286	-0.517195	0.251862	1.88023	1.51896	1.474	0.573143	1.85352	0.277451	1.38553	0.171348	-0.322251	-0.173003	2.17346	1.37326	0.947978	0.0415304	0.524084	0.335883	1.13461	0.681229	0.559478	0.148774	-0.176249	-0.412214	-0.283378	-0.190992	0.395125	-0.76222	0.54776	-0.250409	0.123862	-0.606424	0.959689	-0.197032
AAACGCTAGCAGGTCA-1_1	Cancer_HGSOC1	4507	1867	6.96694	NA	NA	5	5	0.244032	Singlet	Tumor	T_cells	CD8T	-1.38498	-0.665119	0.20865	-0.244913	-0.780307	0.0638218	-1.16507	-0.411974	-0.958352	-0.680774	-0.893723	0.0560135	-0.426941	-0.179398	-0.576137	-0.955129	-0.564716	-0.677566	0.108748	-1.04416	-0.329595	-0.130484	-0.147862	-0.163114	-1.03095	-0.480542	-0.577969	-0.342357	0.0968866	0.0953928	-0.0838516	-0.667257	-0.300514	-0.405311	-0.129887	0.0117439
AAACGCTCAACCGCCA-1_1	Cancer_HGSOC1	6434	2396	5.25334	NA	NA	9	9	0.212202	Singlet	Tumor	NK_cell	CD8T	-0.499363	-0.237213	1.30182	-0.790972	-0.822231	-0.237561	0.891891	0.316324	-0.114682	-0.183238	-0.814209	0.0509961	-0.127931	0.0830975	-0.774356	-0.626329	-0.251526	0.122797	-0.0401784	-0.0696146	0.333274	0.0732007	-0.567927	-0.558299	0.879944	0.0644654	1.64088	1.82012	0.102688	0.0487978	0.139701	-0.542983	0.0235112	0.148377	-0.473419	-0.495353
AAACGCTCAACTTGCA-1_1	Cancer_HGSOC1	2053	946	14.7102	NA	NA	4	4	0.190981	Singlet	Tumor	T_cells	T	-0.662119	-1.13907	-0.898132	-0.642064	-0.564962	-0.865751	-0.722768	-1.32747	-0.607822	-0.827595	-0.647614	-0.938097	-1.43644	-0.78512	-0.651995	-0.0153062	-0.409333	-1.13074	-0.450984	-0.767532	-0.811755	-0.553661	0.0407431	-0.608646	-0.515529	-0.914804	-1.54859	-0.97423	0.735463	0.270538	-1.07948	-0.432948	-1.16572	-0.955033	-0.807274	-0.621467
AAACGCTCACGCGGTT-1_1	Cancer_HGSOC1	784	598	2.04082	NA	NA	0	0	0.230769	Singlet	Tumor	Monocyte	epithelial	2.47309	-0.922405	-1.62677	-0.410871	-0.696945	-0.795612	-0.890142	-0.938068	0.269756	-0.80412	-0.598829	-1.48842	-1.25556	-0.883431	-0.463597	-0.397334	-0.527634	-0.639567	-0.827021	-0.411564	-0.248284	-1.00723	-1.01998	-1.26353	-1.34216	-1.24824	-1.17942	-1.64214	1.17352	-0.914758	-0.999717	-1.09455	-1.37086	-0.971004	-0.20859	-0.277948
AAACGCTCATATGGCT-1_1	Cancer_HGSOC1	5710	2254	3.99299	NA	NA	5	5	0.225464	Singlet	Tumor	T_cells	CD8T	-0.240084	-0.0417927	0.865165	-0.0985929	0.390226	0.411616	0.734942	0.147541	-0.97685	-0.409026	-0.33844	0.728885	-0.493621	-0.165752	-0.365386	-0.247429	-0.453247	-0.207128	-0.114558	-0.214335	-0.267997	-0.0357349	-0.141291	0.493506	-0.738736	0.61427	0.822302	0.954526	0.320814	0.564674	0.221694	-0.130622	-0.0531168	-0.340179	-0.429412	-0.364174
AAACGCTTCGGTCGAC-1_1	Cancer_HGSOC1	5317	1993	5.13447	NA	NA	5	5	0.238727	Singlet	Tumor	T_cells	CD8T	-0.976684	-0.5196	0.438064	-0.222352	-0.804958	-0.747456	-0.46081	0.118516	-0.276264	-0.323758	-1.00471	-0.215512	0.0393112	-0.255932	-0.438231	-0.889589	-0.809883	0.324787	-0.239963	0.178732	-0.870038	-0.24796	0.411429	-0.312497	-0.741304	-0.177862	1.02587	0.488042	1.02489	0.66422	-0.019067	-0.446453	-0.514647	-1.18289	-1.12356	-1.18221
AAACGCTTCTCCACTG-1_1	Cancer_HGSOC1	10129	2880	11.2252	NA	NA	1	1	0.265252	Singlet	Tumor	Macrophage	myeloid	-0.144988	0.0484197	0.898024	0.573452	1.25344	0.665982	-0.00355915	0.855814	-0.954593	0.125553	1.17714	1.11451	0.129414	-0.357882	0.00196022	0.466075	0.101622	-0.396111	0.283404	-0.636829	0.672681	0.920256	0.550668	1.16483	1.46943	2.66556	-0.233881	0.489168	-0.45082	1.24238	0.903927	0.0438165	-0.317266	-0.675955	0.764009	0.53635
AAACGCTTCTGCTCTG-1_1	Cancer_HGSOC1	12756	3352	9.3211	NA	NA	1	1	0.243148	Singlet	Tumor	Monocyte	myeloid	-0.795565	0.47337	1.43064	-0.0404932	0.106236	0.124407	-0.994165	1.20075	-1.50672	0.526763	1.08402	1.47217	0.408631	0.395937	-0.322842	-0.126301	0.123452	0.242319	0.72459	-0.412606	0.636052	-0.50231	0.646063	1.49239	2.58384	2.52878	0.178017	1.11637	-0.946837	2.85213	0.460671	0.566549	0.446779	0.337242	0.104053	-0.0805079
AAAGAACAGGTTCTTG-1_1	Cancer_HGSOC1	7013	2542	4.26351	NA	NA	3	3	0.167993	Singlet	Tumor	NK_cell	NK	-0.904542	-0.162709	1.20402	-0.32885	-0.287669	0.275747	1.03631	-0.712516	-1.20132	0.676181	-0.419776	0.326861	-0.0934631	-0.223163	-0.424576	-0.267436	0.241265	-0.307952	0.00881166	-0.667578	0.391178	-0.286744	-0.0615139	1.39729	0.683513	0.305363	1.51888	1.65311	0.306846	0.642521	0.879474	-0.295465	-0.0431946	0.63838	-0.185368	-0.593332
AAAGAACCAGAAGTGC-1_1	Cancer_HGSOC1	20596	4335	12.852	NA	NA	1	1	0.284704	Singlet	Tumor	Macrophage	myeloid	-0.37758	0.770409	1.63634	0.531099	1.05242	0.334748	1.25741	1.29808	-0.107128	0.919587	1.53805	2.81991	1.36869	3.32959	0.134079	0.0644704	0.887901	0.728645	2.54704	0.642443	0.516516	0.866342	0.603848	1.25304	2.46721	3.64153	1.76466	1.87929	-1.05142	2.00926	1.33744	1.34894	1.09892	1.36771	-0.45122	0.733509
AAAGAACGTGCCGTAC-1_1	Cancer_HGSOC1	5610	2244	10.6774	NA	NA	3	3	0.196286	Singlet	Tumor	NK_cell	NK	-1.70442	-0.53213	0.729574	0.00570685	-0.096575	-0.471714	0.723183	-0.250754	0.190316	-0.595922	-0.811691	-0.805899	-0.24235	0.0689463	-0.649021	-0.391015	0.0220687	-0.260299	0.270717	-0.408434	0.183261	-0.414088	0.29542	0.761373	0.357627	0.0718497	0.304988	0.0800125	-0.00419909	-0.0367457	-0.148072	0.230194	-0.0934499	0.731751	-0.341444	-0.993255
AAAGAACGTTAGGAGC-1_1	Cancer_HGSOC1	2585	1239	5.60928	NA	NA	5	5	0.230769	Singlet	Tumor	T_cells	CD8T	-0.06229	-0.973335	0.0328481	-0.979757	-0.305226	0.0470462	-0.375982	-0.983711	0.0492789	-0.905581	-0.971639	-0.40506	-0.529464	-0.54308	-0.400936	-0.64307	-0.821027	-1.28491	-0.48741	-0.892958	0.285531	-1.00681	-0.701866	-0.706335	-0.838506	-0.589425	-1.08432	-0.660941	1.19956	-0.677825	-0.0865169	-0.888589	-0.444838	-0.689977	-0.806026	-1.1957
AAAGGATAGGGAGAAT-1_1	Cancer_HGSOC1	2985	1344	11.1893	NA	NA	9	9	0.215738	Singlet	Tumor	NK_cell	CD8T	0.520743	-0.946212	0.258868	-1.25521	-0.865751	-0.74967	0.799016	-0.487317	-0.332899	0.0966872	-0.865654	-0.561103	-0.82888	-0.66663	-0.560594	-0.500693	-0.64256	-0.772337	-0.34207	-0.602197	-0.230416	-0.826465	-0.757224	0.291023	0.260725	0.0552719	1.58813	1.41041	0.776324	-0.749064	-0.306524	-0.749468	-0.790329	-0.550024	-0.561437	-0.81524
AAAGGATAGTATGGCG-1_1	Cancer_HGSOC1	3935	1431	17.8653	NA	NA	1	1	0.305924	Singlet	Tumor	Macrophage	myeloid	0.265148	-0.653732	0.0333879	-0.35728	-0.255124	-1.07695	-0.478099	0.0708094	-0.937382	-0.344285	0.313856	0.0711753	-0.603082	-0.53086	-0.605217	-0.24383	-0.219627	-1.22018	-0.319255	-0.859568	0.415268	-0.545352	-0.411654	-0.089768	0.202565	0.408794	-1.26717	-0.798408	1.12275	-0.587549	-0.231553	-0.496364	-0.799538	-0.341947	0.418959	0.617827
AAAGGATCACCGTGGT-1_1	Cancer_HGSOC1	3491	1491	8.24979	NA	NA	3	3	0.193634	Singlet	Tumor	NK_cell	NK	0.300097	-0.284164	0.513009	-0.32185	-0.318553	-0.851565	-0.138789	-0.23806	-0.417805	-0.298353	-0.307427	-0.518592	-0.579555	-0.749445	-0.129931	-0.199141	-0.494514	-0.683846	-0.554367	-0.521462	-0.881293	-0.517623	-0.293224	1.07166	-0.0493654	0.125803	-0.592625	-0.379445	0.367299	1.12182	-0.290938	-0.498754	-0.459338	-0.122421	-0.262973	0.344512
AAAGGATCATACAGGG-1_1	Cancer_HGSOC1	8989	2696	15.6413	NA	NA	3	3	0.280283	Singlet	Tumor	NK_cell	NK	0.212098	-0.0518279	0.846563	0.0702283	-0.661342	0.530972	0.298998	1.1733	0.322884	0.501133	-0.239617	0.750303	-0.204841	0.103779	-0.578303	-0.0452261	0.105122	0.0713664	-0.257761	-0.321324	-1.22672	0.105641	0.309973	0.347825	0.481914	1.10388	0.741378	0.648352	0.665967	0.316049	0.182848	0.110113	-0.105353	-0.213981	0.933186	-0.0836948
AAAGGATCATAGCACT-1_1	Cancer_HGSOC1	6100	1908	7.32787	NA	NA	2	2	0.242263	Singlet	Tumor	T_cells	CD4T	-0.808732	-0.210524	0.0691266	-0.0844706	-0.849311	-0.727064	0.18504	-0.735201	-0.394968	-0.408673	-0.502044	-0.725965	-0.137442	-0.0593739	-0.374714	-0.308286	-0.581819	0.203093	-0.481921	-0.761411	-0.885506	-0.549192	-0.653323	-0.189068	-0.333722	-0.186858	-0.744022	-0.797735	-0.412463	-0.305067	-0.396926	-0.342021	-0.0588497	-0.251828	-1.38041	-1.50504
AAAGGGCAGAGGTTTA-1_1	Cancer_HGSOC1	9756	2984	21.5355	NA	NA	0	0	0.298851	Singlet	Tumor	Epithelial_cells	epithelial	0.888595	0.218827	-1.18878	0.403773	0.270028	0.860753	-0.28772	0.270658	0.900323	0.925495	0.664232	-0.334767	0.798159	0.332607	-0.179098	0.87268	0.427955	0.625655	0.462443	0.246855	0.6383	0.0909888	0.12481	-0.781497	-0.981006	-0.680861	-0.48774	-0.930478	-0.40768	-0.668915	0.581003	-0.0540684	1.17951	1.78984	0.822306	0.275628
AAAGGGCAGGGTATAT-1_1	Cancer_HGSOC1	4914	1723	12.1286	NA	NA	3	3	0.188329	Singlet	Tumor	NK_cell	NK	-0.186375	-0.294261	0.999505	-0.678215	-0.344274	-0.23191	0.559955	-0.0807528	-0.482557	-0.715445	-0.725946	0.670684	-0.444245	-0.381828	-0.0722645	-0.250187	-0.287255	-0.989324	-0.255022	-0.565367	0.741808	-0.683336	-0.20141	0.766748	0.535595	0.399074	0.512819	0.480579	0.393869	-0.123289	-0.240362	-0.417966	-0.48279	-0.858655	-0.574716	0.308954
AAAGGGCCACAAATAG-1_1	Cancer_HGSOC1	7527	2036	0.704132	NA	NA	0	0	0.298851	Singlet	Tumor	Epithelial_cells	epithelial	1.41167	0.653462	-0.959638	-0.477281	-0.943478	-0.531969	-0.743189	-0.113555	-0.336141	-0.286171	-0.290535	-0.955192	0.168947	0.865587	-0.277327	-0.680842	-0.0397516	0.0072	0.60541	-0.0393505	-0.691772	0.202176	-0.358819	-1.11795	-1.47922	-1.11602	-0.0826627	-0.841558	0.685093	-1.48712	-0.514566	-0.511128	0.669884	-0.168293	-0.412026	0.413065
AAAGGGCCACGCAAAG-1_1	Cancer_HGSOC1	2632	1069	15.1216	NA	NA	3	3	0.229885	Singlet	Tumor	NK_cell	NK	0.081079	-1.28543	-0.112298	-1.09045	-0.623546	-0.694964	0.234685	-0.593278	-0.877384	-0.694113	-0.710879	-0.0889133	-1.03732	-0.747018	-0.405408	-0.669899	-0.668782	-1.37246	-0.730574	-0.971212	-1.25587	-1.13679	-0.346995	-0.580706	-0.398981	-0.804062	-1.28852	-0.994874	0.459285	-0.238717	-0.526239	-1.37829	-0.96018	-1.05883	-0.518791	-0.691615
AAAGGGCCAGTATACC-1_1	Cancer_HGSOC1	2181	896	1.37552	NA	NA	0	0	0.272325	Singlet	Tumor	Epithelial_cells	epithelial	0.329827	-0.311928	-1.10858	-1.06257	-0.173767	-0.884261	-0.910794	-0.794904	0.197127	-0.36877	0.115622	-1.40829	-0.763931	-1.06493	-0.539187	-0.411486	-0.367199	-0.858901	-1.22841	-0.602309	-0.544212	-0.779271	-1.0005	-1.21393	-0.964786	-0.266394	-0.853894	-1.21914	1.00833	-0.770428	-0.981626	-1.11088	-0.491686	-0.488943	-0.442417	-1.03016
AAAGGGCTCGAGTGAG-1_1	Cancer_HGSOC1	3899	1748	7.59169	NA	NA	5	5	0.236074	Singlet	Tumor	T_cells	CD8T	0.561821	-0.521156	0.67385	-0.50697	-0.474435	-0.312609	0.0247019	0.299577	-0.45701	-1.04748	-0.639077	-0.224319	-0.260768	-0.459341	-0.323649	-0.157787	-0.179573	-0.70262	-0.439969	-0.820835	-0.841891	-0.275646	-0.607937	0.0651106	-0.0309093	0.105393	-0.271124	-0.221747	-0.162051	0.56195	-0.28341	-0.711156	-0.524426	-0.235536	-0.690492	-1.32128
AAAGGGCTCGGATACT-1_1	Cancer_HGSOC1	3505	1567	8.27389	NA	NA	3	3	0.204244	Singlet	Tumor	NK_cell	NK	-0.596734	-0.619203	0.77393	-0.298005	-0.588894	-0.525992	0.256357	-0.606298	-0.281116	-0.838675	-0.169972	0.090782	-0.626542	-0.341191	-0.0855987	-0.122957	-0.0256489	-0.0414027	-0.219562	-0.751749	-0.245375	-0.85	-0.137149	1.14447	-0.00287161	-0.0933791	-0.318375	0.222903	-0.10463	-0.55049	0.093561	-0.498875	-0.445107	-0.031634	-0.307009	-0.49891
AAAGGGCTCGTGAGAG-1_1	Cancer_HGSOC1	2267	1077	13.4098	NA	NA	3	3	0.208665	Singlet	Tumor	NK_cell	NK	-0.797946	-1.15523	-0.473849	-0.86066	-0.833773	-0.592878	-0.0368359	-0.813935	-0.710375	-0.781013	-0.730741	-0.493062	-0.975039	-0.865736	-0.542666	-0.145154	-0.510266	-0.66222	-0.537625	-0.985073	-1.24917	-0.890093	-0.674448	-0.179557	0.567828	-0.487358	-0.908052	-0.787882	1.12441	-0.858444	-0.777134	-1.00856	-1.20667	-1.09237	-0.222737	0.496933
AAAGGGCTCTGGAGAG-1_1	Cancer_HGSOC1	16632	2259	4.11255	NA	NA	15	15	0.222812	Singlet	Tumor	B_cell	B	1.56654	0.00106143	-0.6034	0.105131	-1.17156	-0.921661	0.311774	-0.370892	-0.135693	0.271136	-0.301863	-0.194825	0.377893	-0.301769	-0.441442	-0.0395494	-0.0623438	0.00497037	-0.36747	0.0145873	-0.903254	0.602423	-0.333366	-0.950189	-0.00306929	-0.187284	0.269425	-0.0155372	-0.0149972	-1.20284	-0.622012	0.431081	0.282931	-0.274826	-0.879315	-0.810782
AAAGGTAAGACTGAGC-1_1	Cancer_HGSOC1	5184	1638	10.7253	NA	NA	2	2	0.226348	Singlet	Tumor	T_cells	CD4T	-1.17561	-0.611083	0.201362	-0.143084	-0.356103	-0.190582	0.333171	-0.366241	0.359008	-0.672941	-0.571009	-0.466604	0.0392253	-0.193365	-0.508483	-0.820724	-0.753931	-0.444833	-0.556139	-0.542591	-0.852775	-0.432094	-0.0636784	-0.850127	-0.361052	-0.0547255	0.32599	-0.0478065	0.155621	-0.245296	-0.422966	-0.329974	-0.0471773	-0.214196	-0.383275	-0.788296
AAAGGTAAGTCATACC-1_1	Cancer_HGSOC1	3380	1300	23.8166	NA	NA	4	4	0.229885	Singlet	Tumor	NK_cell	T	-0.99783	-0.795146	-0.156151	-1.10678	0.329738	-0.919278	0.086018	-0.357581	-0.132864	-0.591886	-0.337904	-0.405664	-0.866683	-0.688747	-0.446557	-0.393137	-0.336462	-0.907548	-0.516049	-0.653803	1.00237	-0.104557	-0.0828525	0.810076	-0.0239137	-0.38045	-1.23226	-0.787595	0.778256	-0.223217	-0.49337	-0.963955	-1.30532	-0.465436	0.259359	-0.382086
AAAGGTACAACGCATT-1_1	Cancer_HGSOC1	5487	2136	6.17824	NA	NA	3	3	0.226348	Singlet	Tumor	NK_cell	NK	-0.275153	-0.323286	0.838819	-0.431218	-0.361846	-0.0464794	-0.411914	-0.118079	0.886071	-0.360474	-0.291506	0.125498	-0.278624	-0.294464	-0.61767	-0.719812	-0.74069	-0.645225	-0.226776	-0.690046	-0.34677	0.498253	-1.06259	0.762392	0.336111	0.306444	0.320035	0.389273	-0.197005	0.218182	-0.229095	0.24779	-0.0676696	-0.789702	0.118368	0.13048
AAAGGTACAGGCCCTA-1_1	Cancer_HGSOC1	3890	1485	10.8226	NA	NA	3	3	0.20336	Singlet	Tumor	NK_cell	NK	-1.22634	-0.949343	0.442325	-0.272143	-1.03734	-0.956594	0.0059275	-0.179853	-0.894724	-0.367359	-0.404617	-0.0328169	-0.378787	-0.657697	-0.295949	0.0254565	-0.445257	-0.551114	-0.636016	-0.444398	-0.531605	-0.918508	-0.127853	0.436559	-0.119667	-0.0136741	-1.00437	-0.545056	0.951388	0.754071	-0.861614	-0.600713	-0.458231	-0.93237	-0.195976	0.593668
AAAGGTACATTGCAAC-1_1	Cancer_HGSOC1	7212	2027	6.66944	NA	NA	2	2	0.243148	Singlet	Tumor	T_cells	CD4T	-1.11641	-0.0715433	0.777983	0.160613	-0.213196	-0.378706	0.632988	-0.189974	0.29875	-1.32777	-0.695193	-0.236069	-0.661083	-0.39447	-0.559649	0.174827	-0.263666	-0.858137	-0.645942	-0.615973	-0.394941	0.00604919	0.0711621	0.701679	1.19598	0.223383	-0.38817	-0.14862	0.402239	0.0921702	-0.451836	-0.247876	-0.033951	0.08259	-0.201494	0.110821
AAAGGTAGTGCGACAA-1_1	Cancer_HGSOC1	9097	2668	9.95933	NA	NA	3	3	0.197171	Singlet	Tumor	NK_cell	NK	0.0436274	0.378374	1.40936	0.461891	0.589091	-0.0887167	1.54355	0.312961	-0.255013	0.0647741	-0.861059	0.202152	0.644244	0.381591	-0.455032	0.0710344	-0.247468	0.452456	0.273703	0.271443	0.459157	-0.128235	0.743529	1.79732	1.01467	0.387015	-0.552322	0.214444	-0.283217	0.346949	0.58444	0.450956	0.934009	0.315502	-0.34206	-0.318078
AAAGGTATCACGGGCT-1_1	Cancer_HGSOC1	5143	2141	5.87206	NA	NA	5	5	0.190981	Singlet	Tumor	NK_cell	CD8T	2.19695	-0.0687391	1.27515	0.32539	-0.679061	-0.0229669	0.997468	0.179161	0.210448	0.100127	-0.629799	0.283022	0.00135237	0.0728562	-0.441351	-0.426139	0.157779	-0.232203	-0.200296	-0.320597	-1.44883	-0.397492	-0.356844	0.644849	-0.334558	-0.124216	-0.345366	0.171487	0.210134	0.52848	-0.183548	0.278642	0.0561586	-0.000508168	-0.79912	-0.280047
AAAGTCCAGCTGTTCA-1_1	Cancer_HGSOC1	3808	998	12.7889	NA	NA	0	0	0.249337	Singlet	Tumor	Epithelial_cells	epithelial	1.04476	-0.375679	-1.2244	-0.951593	-0.69763	-0.931607	-0.235774	-0.46774	0.606584	0.140607	0.0805217	-1.02874	-0.501074	-0.924048	-0.310485	-0.0966421	-0.257547	-0.604447	-1.21588	-0.492775	-0.47617	-0.45636	-0.620293	-1.56924	-0.906332	-0.827672	-1.02557	-1.2633	0.92629	-1.01569	-0.880613	-1.1243	-0.749303	-0.315569	-0.234142	0.0128295
AAAGTCCGTATAGGAT-1_1	Cancer_HGSOC1	1354	668	13.4417	NA	NA	5	5	0.202476	Singlet	Tumor	NK_cell	CD8T	0.24228	-0.95153	-0.324668	-0.75654	-0.752548	-1.13117	-0.0428287	-1.10116	-0.510911	-0.781342	-0.66976	-0.55646	-1.03059	-1.0409	-0.531925	-0.421309	-0.791573	-0.959123	-1.20556	-1.02698	-1.04398	-0.991111	-1.17044	-1.51612	-0.274339	-0.995163	-1.10234	-1.42203	0.905068	-0.108185	-0.960479	-0.851697	-1.1793	-0.720007	-0.770517	-0.750873
AAAGTCCGTCGAAACG-1_1	Cancer_HGSOC1	6478	2128	15.3442	NA	NA	1	1	0.258179	Singlet	Tumor	Macrophage	myeloid	0.389777	0.0133433	0.312665	0.531655	-0.096458	-0.0860379	0.23814	0.351043	-1.93289	-0.182547	0.730143	1.30061	-0.206985	-0.488993	-0.292838	-0.456999	-0.304199	0.106845	-0.236746	-0.649093	1.44876	0.296509	0.161466	0.0626519	0.551093	1.37927	-0.490024	0.105099	0.584737	1.93515	0.0926157	-0.700761	-0.278228	-0.0770351	0.124594	1.16908
AAAGTCCGTCTTGAGT-1_1	Cancer_HGSOC1	4224	1755	7.50473	NA	NA	5	5	0.247569	Singlet	Tumor	T_cells	CD8T	-0.831139	-0.614307	1.12545	-1.06953	-0.742613	-0.360777	1.40639	0.0272804	1.46537	-0.313809	-0.487022	-0.125262	-0.00496913	-0.311741	-0.224395	-0.374043	-0.367975	-0.333632	-0.0190567	-0.590341	-0.97634	-0.520249	0.310619	-0.331957	0.33708	0.391489	0.744346	0.599287	0.819208	0.086495	-0.639738	-0.126246	-0.138752	0.433799	-0.740412	-0.323798
AAAGTCCTCAATCCGA-1_1	Cancer_HGSOC1	5017	1670	9.50767	NA	NA	12	12	0.229001	Singlet	Tumor	B_cell	B	0.40419	-0.848762	-0.633091	-0.87477	-1.1005	-0.194702	-1.0839	-0.42794	-0.386989	-0.399563	-0.659492	-1.01619	-0.359855	-0.522996	-0.180555	-0.645751	-0.296791	-0.609687	-0.577948	-0.807585	1.49411	-0.482612	-0.108531	-0.49493	-0.796513	-0.758325	-0.699042	-0.725963	0.147466	-0.0728748	-0.204151	-0.230193	-0.349722	-0.695743	0.00338931	-0.750103
AAAGTGAAGAGGCGTT-1_1	Cancer_HGSOC1	3868	1588	9.12616	NA	NA	3	3	0.201592	Singlet	Tumor	NK_cell	NK	0.0785069	-0.658654	0.607574	-0.214516	0.00808282	-0.585723	-0.579423	-0.295212	-0.504055	-0.677526	-0.615126	-0.0533026	-0.585083	-0.701566	-0.384084	-0.40348	-0.163699	-0.744831	-0.343313	-0.616858	-0.798358	-0.726704	-0.0287142	0.282758	0.420456	0.634415	-0.0413922	-0.0661769	0.251824	0.195695	-0.211337	-0.717345	-0.531783	-0.612374	-0.209109	-0.762373
AAAGTGAAGTATTGCC-1_1	Cancer_HGSOC1	2970	1133	11.4141	NA	NA	9	9	0.223696	Singlet	Tumor	T_cells	CD8T	-0.625691	-0.751983	-0.107226	-0.556015	-0.845472	-0.781172	-0.221529	-0.839224	-0.292545	-0.924675	-0.689946	-0.797474	-0.928073	-0.530617	-0.37184	-0.696063	-0.721749	-0.555518	-0.74631	-0.572878	-0.927037	-0.836933	-0.771411	-0.648621	-0.239447	-0.247142	0.873421	0.376435	1.72596	-0.550173	-0.712028	-0.648346	-0.605311	-0.108704	-0.636835	-0.455281
AAAGTGAGTGGTAACG-1_1	Cancer_HGSOC1	5175	2058	6.10628	NA	NA	3	3	0.179487	Singlet	Tumor	NK_cell	NK	-1.60581	-0.323398	1.01942	-0.0773502	-0.85397	-0.377215	0.515895	-0.137846	0.929817	0.275817	-0.990536	0.499885	-0.378703	0.0982588	-0.496609	-0.0669639	0.0216336	-0.113133	0.00857213	-0.976307	-1.1749	-0.163974	-0.408874	0.424128	1.12769	-0.324658	-0.64464	0.0376226	-0.454029	0.187282	-0.280102	-0.164678	-0.0993552	-0.187698	-1.14562	-1.05775
AAAGTGATCCACCTGT-1_1	Cancer_HGSOC1	14207	3815	4.82157	NA	NA	1	1	0.34748	Singlet	Tumor	Macrophage	myeloid	-1.18432	0.795249	2.08125	0.586857	0.40428	0.175369	-0.243934	1.42298	-0.303114	0.647249	1.14055	1.94094	0.664776	0.461644	-0.0433724	0.851529	0.74982	0.357287	0.857519	0.546343	0.817867	0.808372	1.31958	2.34725	1.7269	1.90011	0.628096	0.870258	-0.39475	2.5781	0.372756	0.691534	1.02529	0.521918	0.0864726	0.742854
AAAGTGATCTCTCTAA-1_1	Cancer_HGSOC1	7514	2509	6.60101	NA	NA	2	2	0.225464	Singlet	Tumor	T_cells	CD4T	-0.637566	0.0705893	0.822704	-0.288595	-0.441945	-0.203356	0.333859	0.213418	-0.374655	-0.0323549	-0.526806	0.678534	0.141686	-0.304464	-0.230685	-0.483515	-0.474883	-0.00190988	-0.374841	-0.439408	0.183777	0.568802	0.817124	1.30929	1.60077	0.724759	-0.418438	0.13916	0.11007	0.593163	0.072201	0.189308	-0.327082	-0.619025	-0.591323	0.545768
AAATGGAAGGTTAAAC-1_1	Cancer_HGSOC1	30783	6192	22.6131	NA	NA	0	0	0.338638	Singlet	Tumor	Epithelial_cells	epithelial	-0.767574	0.957992	-0.944196	1.654	1.0703	1.97277	1.31464	1.70222	0.000476346	1.95798	0.356093	1.49654	1.09189	1.38695	-0.459414	2.79675	2.14699	0.389018	1.50712	0.645117	2.59885	2.31236	1.08097	1.35593	0.554084	0.310797	0.278538	0.575282	-0.321798	-1.84981	1.79821	1.10698	0.837207	1.99611	1.41419	2.569
AAATGGAAGTTGAATG-1_1	Cancer_HGSOC1	4142	1374	24.6982	NA	NA	1	1	0.306808	Singlet	Tumor	Macrophage	myeloid	1.12269	-0.556766	-0.351613	-0.524133	0.382502	-0.24423	0.824747	0.0517582	-1.07122	-0.0863077	0.762768	0.195386	-0.915269	-0.740732	0.0655273	-0.316457	-0.494108	-0.777914	-0.460149	-0.326206	0.502066	-0.418003	0.252222	-1.02846	-0.617184	1.07866	-0.89702	-0.85433	1.13076	1.34664	-0.444442	-0.645379	-1.10554	0.0836227	0.245963	-0.618032
AAATGGAGTGAGTAAT-1_1	Cancer_HGSOC1	29680	5254	2.01482	NA	NA	1	1	0.341291	Singlet	Tumor	Macrophage	myeloid	0.533109	2.00065	1.13998	1.80193	0.276234	2.4595	2.35165	1.77476	2.51307	1.36575	2.3912	3.57794	0.617413	0.118118	1.12787	0.88207	1.23476	1.40815	0.412387	2.01034	1.87504	2.35325	3.05098	2.2376	2.95925	2.65575	0.639595	0.899724	-1.81682	2.37445	2.07377	1.37402	0.83415	-0.398369	1.64446	2.30439
AAATGGAGTGGGCTCT-1_1	Cancer_HGSOC1	8526	2525	15.7166	NA	NA	1	1	0.261715	Singlet	Tumor	Macrophage	myeloid	-0.483358	0.308446	1.00712	-0.862127	0.426026	-0.306636	0.052457	0.352895	-0.0640442	0.34761	1.52436	1.18407	-0.480359	-0.595501	-0.195806	0.241632	-0.223065	-0.218674	-0.04082	-0.418919	2.0099	0.273914	0.780717	0.670618	2.69507	1.65097	1.39616	1.64781	0.231382	2.43455	0.805067	0.0558621	-0.445699	-0.023191	0.479295	0.789667
AAATGGAGTGTTAACC-1_1	Cancer_HGSOC1	785	469	20.1274	NA	NA	4	4	0.212202	Singlet	Tumor	NK_cell	T	-0.0325896	-1.10761	-0.99488	-1.31281	-0.659326	-1.03478	-0.853898	-1.10851	-0.915965	-0.984945	-0.327232	-1.51291	-1.11994	-0.764271	-0.204018	-0.465593	-0.89334	-0.91766	-1.01468	-1.20016	-0.945497	-1.18558	-1.48478	-1.12239	-1.02318	-0.898968	-1.48265	-1.59475	0.939092	-0.479742	-1.24581	-1.50808	-1.60625	-0.488097	-0.082619	-1.07874
AAATGGATCAGCAATC-1_1	Cancer_HGSOC1	3768	1548	8.81104	NA	NA	5	5	0.243148	Singlet	Tumor	T_cells	CD8T	0.11071	-0.411761	0.992855	-0.177808	-0.835993	-0.652803	0.377379	0.203945	0.0033084	-0.605681	-0.824105	-0.121267	-0.852719	-0.385146	-0.303216	-0.529565	-0.502676	-0.570637	-0.202099	-0.641469	-0.797451	-1.13699	-0.234413	0.00618137	0.351685	0.324465	-0.189144	0.246023	0.721556	0.0659853	-0.183883	-0.05224	-0.353888	-0.281652	-0.441796	-1.36378
AAATGGATCCACCCTA-1_1	Cancer_HGSOC1	23018	4959	5.98662	NA	NA	1	1	0.271441	Singlet	Tumor	Monocyte	myeloid	-0.809869	1.68412	1.42182	0.914975	0.361723	0.58841	0.57116	1.7004	-0.577537	1.43283	0.728539	1.65396	1.05518	1.12098	-0.346576	0.222583	1.02861	1.59452	1.83204	0.237392	0.366568	1.19373	0.820761	1.25944	1.68348	1.62911	1.47705	0.975854	-2.10999	1.73054	1.64611	1.34224	1.42359	1.50457	0.289078	0.67225
AAATGGATCTTGGAAC-1_1	Cancer_HGSOC1	3600	1429	23.7778	NA	NA	9	9	0.279399	Singlet	Tumor	Monocyte	CD8T	-0.109736	-0.487155	-0.0373057	-0.397842	-0.0787285	-0.473245	0.456345	-0.434452	-0.168289	-0.516447	0.119942	-0.317632	-0.812965	-0.312852	-0.184088	-0.587766	-0.635395	-1.15142	-0.202614	-1.2079	0.192428	-0.354876	-0.789581	-0.705227	0.729776	0.734599	0.830119	0.845916	1.86215	0.0865396	-0.27994	-1.09538	-0.979403	-0.920992	-0.308544	-0.422498
AACAAAGAGTTTCGGT-1_1	Cancer_HGSOC1	27682	5286	8.08468	NA	NA	1	1	0.324492	Singlet	Tumor	Monocyte	myeloid	-1.74386	1.32667	1.73202	1.23274	-0.0351337	0.530508	-0.105717	1.75683	-0.553842	1.34851	0.71028	1.93471	1.81305	1.33402	-0.316649	0.828365	1.12313	1.43418	0.892609	0.661535	0.882196	0.615236	1.22946	2.5369	2.25895	2.49423	0.910115	1.7029	-0.436556	2.91992	1.75933	1.80197	1.82234	2.18907	0.285994	0.564393
AACAAAGCATTGACAC-1_1	Cancer_HGSOC1	22283	4991	9.89544	NA	NA	0	0	0.282935	Singlet	Tumor	NK_cell	epithelial	-1.52992	0.895744	0.75085	1.71692	0.0310692	0.852454	1.87417	1.31203	0.121724	1.43511	0.172299	0.640481	1.12804	0.770445	0.0141864	1.79132	1.36712	0.56477	0.655029	0.170208	2.42934	1.67266	1.27274	1.49127	0.375671	0.755245	0.397089	0.792049	-1.14879	0.108381	0.691805	0.837113	1.28621	0.888095	1.60908	0.332402
AACAAAGTCAATCAGC-1_1	Cancer_HGSOC1	9258	2876	6.78332	NA	NA	3	3	0.222812	Singlet	Tumor	NK_cell	NK	-1.54252	0.376787	0.942595	0.175228	-0.519978	0.128882	0.681242	0.420561	1.01886	0.625539	-0.384979	0.710728	0.388005	0.24274	-0.73106	-0.383237	0.0947868	1.0504	-0.0888323	0.0949586	0.670203	-0.384901	0.0476414	2.18935	0.540553	0.507781	-0.0695428	0.0825415	-0.696246	0.342348	0.251954	0.677269	0.638294	0.556025	-0.256844	-0.311862
AACAAAGTCAGTCTTT-1_1	Cancer_HGSOC1	4233	1812	8.05575	NA	NA	3	3	0.222812	Singlet	Tumor	NK_cell	NK	0.285747	-0.683775	1.29482	-0.548587	-0.240434	-0.625045	1.75294	-0.252203	-0.569066	-0.777736	-0.470327	0.33661	-0.413778	-0.303473	-0.127916	-0.432747	-0.518348	-0.756104	-0.1428	-0.358486	-0.212389	-0.437146	0.00917254	0.333915	0.667192	0.589479	0.779619	0.764202	0.354931	-0.196539	-0.0970894	-0.191598	-0.608197	-0.524307	-0.704594	-0.55551
AACAAAGTCCGCCTAT-1_1	Cancer_HGSOC1	2342	971	20.3672	NA	NA	8	8	0.212202	Singlet	Tumor	B_cell	B	0.635267	-1.21655	-1.09112	-0.735696	-0.257742	-1.44657	-1.43789	-1.18045	-1.11166	-0.6299	-0.620595	-1.29701	-1.09906	-0.78037	-0.623807	-0.583703	-0.977925	-1.14987	-0.852604	-1.08779	-1.18559	-0.698055	-1.45165	-1.40545	-1.01306	-0.97524	-1.46447	-1.29163	0.84517	-0.462696	-0.895857	-0.845151	-1.20509	-0.664172	-0.372988	-1.32744
AACAAAGTCCGTAGTA-1_1	Cancer_HGSOC1	3847	1428	8.83806	NA	NA	5	5	0.248453	Singlet	Tumor	NK_cell	CD8T	-0.294626	-0.599977	0.578582	-0.544789	-0.983484	-0.608936	-0.36969	-0.608207	0.662296	-0.18716	-0.295612	-0.857675	-0.69243	-0.469064	-0.411757	-0.635705	-0.801808	-0.0841421	-0.325981	-0.853631	0.146893	-0.501067	-0.475654	-0.776819	-0.172671	-1.03971	-1.23804	-0.705197	0.559466	-0.692786	-0.488877	-0.621369	-0.407678	-0.402434	-0.436059	-0.742423
AACAACCAGCACCAGA-1_1	Cancer_HGSOC1	1791	901	16.6946	NA	NA	4	4	0.209549	Singlet	Tumor	NK_cell	T	-0.609787	-1.1307	-0.0353124	-0.946476	-0.747519	-0.196403	-1.0845	-0.816925	-1.18854	-0.578643	-0.342942	-1.29334	-0.851963	-0.812295	-0.604756	-0.689115	-0.860292	-0.976487	-0.5593	-1.03281	-0.396779	-0.615137	-0.658006	-0.71705	-0.853516	-0.771533	-1.47425	-1.16593	1.09068	-0.369586	-0.361721	-1.3773	-0.863196	-0.768751	-0.472873	-0.266133
AACAACCAGCTCACTA-1_1	Cancer_HGSOC1	8451	2693	14.6018	NA	NA	1	1	0.260831	Singlet	Tumor	Monocyte	myeloid	-0.432631	-0.424976	0.888549	-0.292265	-0.332707	-0.0120928	-0.182286	-0.0175566	0.403334	0.12729	-0.0313591	0.464252	-0.728032	-0.195991	-0.360586	0.111671	-0.53945	-0.448285	0.1172	-0.525108	0.785212	0.535127	0.947614	0.188982	0.673058	1.22472	-0.520211	-0.262532	0.145111	1.14941	0.565914	-0.0174399	-0.355872	-0.040335	-0.00818254	-0.41003
AACAACCAGTATGACA-1_1	Cancer_HGSOC1	10753	2766	10.8342	NA	NA	1	1	0.26702	Singlet	Tumor	Macrophage	myeloid	0.571339	0.293896	1.69697	-0.0494921	0.334256	0.421257	0.836435	1.20689	0.959566	0.828755	0.726687	1.87035	-0.0684792	-0.464334	-0.210565	0.423243	0.384939	-0.469883	-0.101537	-0.437014	1.18164	0.33448	0.920868	2.07555	2.09209	3.5213	1.52756	1.97382	-0.00225639	3.58634	0.244727	0.259171	-0.669487	-0.728372	0.529843	1.73922
AACAACCCAAAGGAGA-1_1	Cancer_HGSOC1	16516	4375	24.8244	NA	NA	0	0	0.32626	Singlet	Tumor	Epithelial_cells	epithelial	3.63343	0.616243	-0.629179	1.81885	-0.0843634	1.27836	2.04843	0.919122	0.0851624	0.664712	0.828795	0.14392	0.578206	0.468824	0.112359	1.68768	1.40881	0.642041	0.322446	0.775891	0.697843	1.24739	0.432409	-0.366389	-0.42305	-0.0569296	-0.710234	-0.39378	-0.118913	0.847149	0.939292	0.998219	0.472047	0.833067	0.996299	0.391983
AACAACCCAGCGTGCT-1_1	Cancer_HGSOC1	44376	6330	8.4708	NA	NA	1	1	0.309461	Singlet	Tumor	Monocyte	myeloid	-1.10956	1.71628	1.30911	1.5426	-0.339671	1.14795	1.12361	1.83368	-1.50541	1.09061	0.130996	1.95438	2.34021	3.43179	-1.08083	0.473171	1.46588	2.17924	3.63711	1.1883	-0.0628837	1.36626	1.26481	1.31823	2.50812	0.87713	0.303665	0.921968	-2.11563	1.63177	3.01124	1.95169	1.80248	0.701204	0.552934	1.37703
AACAACCCAGGTCCCA-1_1	Cancer_HGSOC1	7205	2603	5.38515	NA	NA	3	3	0.196286	Singlet	Tumor	NK_cell	NK	-0.362102	-0.147466	0.450918	-0.121084	-1.11391	-0.315674	1.13	0.793001	0.443529	-0.158893	-0.438644	0.694168	-0.0537951	-0.104395	-0.356781	-0.167761	-0.208441	-0.653933	-0.0281995	-0.508268	0.187644	0.143888	-0.187651	0.863521	-0.224173	-0.663384	-0.16674	-0.135419	-0.412983	0.27766	0.563569	0.135599	-0.0438498	0.212271	0.645969	-0.469008
AACAACCGTGGCTACC-1_1	Cancer_HGSOC1	29833	4238	3.24138	NA	NA	10	10	0.240495	Singlet	Tumor	T_cells	B	2.71542	0.875784	1.16862	1.21675	0.613804	0.70119	1.10142	1.55678	0.0414145	1.33893	0.609291	1.34591	0.670394	0.433499	0.0391638	0.839829	1.36089	1.01973	0.830964	0.510965	-0.269355	1.14881	1.27708	0.991677	1.45158	0.344699	-0.165953	0.445932	-0.416332	1.39953	0.304519	1.11597	0.786945	0.0447631	0.929828	-0.684962
AACAACCGTTTGGGAG-1_1	Cancer_HGSOC1	9985	3145	7.66149	NA	NA	7	7	0.253758	Singlet	Tumor	NK_cell	CD8T	0.655094	0.262837	0.863496	-0.324191	-1.54893	-0.181947	1.26237	0.348072	0.797493	0.256566	-1.37535	0.262708	0.418598	2.03237	-0.692965	-0.513254	-0.207825	0.101637	2.74516	0.0910376	-1.28553	0.575571	-0.175546	0.226711	0.382256	-0.381686	1.08375	0.613556	-0.229852	-0.876956	1.73075	0.160898	0.576831	-0.193474	-0.804233	-0.203469
AACAACCTCCATACAG-1_1	Cancer_HGSOC1	45125	4123	2.9518	NA	NA	15	15	0.233422	Singlet	Tumor	NK_cell	B	-1.43527	1.01802	1.74348	0.732987	-0.772016	0.311757	0.7495	1.48897	-0.901102	0.47677	-0.397002	1.26606	1.14712	0.165925	-0.459809	-0.0893889	0.348083	0.706764	0.687544	0.164236	-0.775242	1.10638	0.385057	1.49017	1.19721	0.879042	1.23174	1.51659	-1.092	0.45223	0.601755	0.868676	0.900266	0.0844101	-0.169666	-0.177189
AACAACCTCTTCGTGC-1_1	Cancer_HGSOC1	7029	2626	4.69484	NA	NA	1	1	0.269673	Singlet	Tumor	Monocyte	myeloid	1.62156	-0.0497175	0.46012	-0.091221	-0.431601	-0.109177	-1.21252	0.332857	-0.754376	-0.517192	0.148232	0.363925	-0.00147624	-0.0960309	-0.598488	-0.334925	-0.335743	-0.644712	-0.00599923	-0.315216	0.0346389	0.560355	-0.334822	0.172848	1.14568	-0.4481	-0.267366	-0.30623	-0.504688	0.531085	0.0956071	0.00402122	-0.0341932	-0.129452	0.0114421	-1.45882
AACAAGAAGACAACAT-1_1	Cancer_HGSOC1	9086	3256	5.7341	NA	NA	3	3	0.167109	Singlet	Tumor	NK_cell	NK	-1.52656	0.579548	1.15499	-0.0330118	-0.870306	0.0778263	0.142921	0.296865	-0.325915	-0.0902072	-1.07341	0.409666	0.675313	0.100481	-0.836333	-0.564421	-0.407543	-0.420653	0.364274	-0.589501	-0.266067	0.64869	0.129164	2.25687	0.731196	0.586359	0.425952	0.693476	-0.308767	0.486481	0.0730473	0.262043	0.472999	-0.395501	-0.62624	-0.135756
AACAAGAAGTAAACTG-1_1	Cancer_HGSOC1	3741	1338	9.75675	NA	NA	2	2	0.215738	Singlet	Tumor	T_cells	CD4T	-0.833857	-1.03987	-0.172772	-0.41715	-0.937842	-1.04615	0.279389	-0.490498	-0.366424	-0.604499	-0.849559	-0.236411	-0.668404	-0.344784	-0.528163	-0.112701	-0.669267	-0.750045	-0.157968	-0.674395	-0.814815	-0.800365	0.0387087	-0.860833	-0.596233	-0.0142361	-1.35526	-1.18056	0.18645	-0.0887972	-0.543266	-0.891032	-0.237825	-0.91292	-1.0723	-0.467272
AACAAGAAGTCGTCTA-1_1	Cancer_HGSOC1	9123	2805	7.26735	NA	NA	2	2	0.225464	Singlet	Tumor	T_cells	CD4T	-0.465787	0.189628	1.38073	-0.0956101	0.140385	0.358324	-0.0187071	0.522178	0.312891	-0.584091	-0.868945	0.18297	0.252177	0.489137	-0.101581	-0.842027	-0.58571	0.152984	0.412981	-0.309226	-0.392869	0.477232	-0.0975388	1.24731	1.50512	0.646981	-0.71181	-0.126307	-0.939981	0.64714	0.517134	-0.0545987	0.556858	0.235872	-0.570125	-0.828077
AACAAGACAATGTCTG-1_1	Cancer_HGSOC1	21165	4566	5.44767	NA	NA	1	1	0.242263	Singlet	Tumor	Monocyte	myeloid	-0.119363	1.6895	1.62355	1.61101	-0.0255743	0.525559	0.737483	1.79255	1.03164	1.83644	1.26364	1.88111	0.695472	0.756617	-0.163906	-0.00643667	0.201927	1.66497	1.03485	0.687877	-0.606478	1.96112	1.37749	0.561517	2.59488	2.47665	1.18643	1.58935	-1.06597	2.21547	0.674412	1.31521	1.22674	1.31653	0.158519	1.40785
AACAAGACACACCAGC-1_1	Cancer_HGSOC1	4879	1855	6.49723	NA	NA	2	2	0.216622	Singlet	Tumor	T_cells	CD4T	0.846826	-0.294922	0.254361	-0.0103481	-0.525766	-0.0985798	-0.186234	0.15711	-0.15965	-0.143959	-1.12861	-0.360256	-0.681682	-0.130922	-0.552048	-0.0220494	-0.159358	-0.977303	0.02585	-0.448897	0.569093	-0.546225	0.423625	-0.382373	0.00808255	0.195527	-0.509263	-0.528471	-0.0136817	0.0263637	-0.0885156	-0.276444	-0.314182	-0.314881	-0.68993	-0.664157
AACAAGACACAGTACT-1_1	Cancer_HGSOC1	1995	853	19.0476	NA	NA	4	4	0.201592	Singlet	Tumor	T_cells	T	0.331277	-0.742414	-1.00797	-1.21549	-0.198968	-1.1439	-0.61491	-0.593698	0.788794	-0.836755	-0.501243	-1.08835	-1.02765	-0.450166	-0.277284	-0.568097	-0.58862	-1.21969	-0.40652	-1.10423	-1.10922	-0.703504	-0.817342	-0.381821	-0.198699	-0.136212	-1.53189	-1.20905	0.929317	-0.172649	-0.992113	-0.864911	-1.08716	-0.946514	-0.318737	-1.25696
AACAAGACAGTCGTTA-1_1	Cancer_HGSOC1	4160	1313	12.3077	NA	NA	8	8	0.22458	Singlet	Tumor	B_cell	B	-0.175492	-0.637801	-1.0866	-0.127012	-0.698313	-1.14555	-0.62521	-1.21487	-0.63617	-0.479079	-0.440655	-0.820368	-0.59989	-0.752217	-0.278659	-0.267528	-0.599861	-0.629784	-0.750896	-0.64059	-1.0904	0.232665	-0.889454	-1.02059	-0.891247	-0.623575	-1.09088	-1.24544	0.230116	-0.863798	-0.844435	-1.01481	-0.744253	-1.05704	-0.439437	-0.739405
AACAAGACATGCCGAC-1_1	Cancer_HGSOC1	4437	1882	5.76966	NA	NA	3	3	0.205128	Singlet	Tumor	NK_cell	NK	0.818444	-0.462482	-0.0114054	-0.469222	-0.91571	-0.37328	0.212157	-0.60758	-0.78471	-0.560648	-0.843014	0.287172	-0.545997	0.00600275	-0.503635	-0.324828	-0.431585	0.00549976	-0.183457	-0.245692	0.196899	0.432166	0.096302	-0.997556	0.00808399	-0.755013	-0.0911457	-0.525387	0.67345	0.733024	0.100105	-0.313991	-0.149605	0.0512833	-0.619443	-1.52702
AACACACCAAATGAGT-1_1	Cancer_HGSOC1	6305	1792	24.4092	NA	NA	1	1	0.303271	Singlet	Tumor	Monocyte	myeloid	0.196762	-0.514975	0.517974	-0.352103	1.0025	-0.422722	-0.756729	0.227151	-0.0984219	-0.439121	1.51057	0.686875	-0.634877	-0.366428	0.000134344	-0.176356	-0.148509	-0.272283	-0.530016	-0.0651852	1.18798	-0.417844	1.04067	0.130429	0.505933	1.06125	-0.777868	-0.048905	1.08553	2.02056	-0.267156	-0.0367544	-0.823012	-0.764667	0.686791	0.114556
AACACACCAAGCCCAC-1_1	Cancer_HGSOC1	8587	3083	11.4592	NA	NA	11	11	0.207781	Singlet	Tumor	Endothelial_cells	endothelial	0.703577	0.197309	-0.965248	0.912096	1.81878	1.03446	0.160374	1.04812	0.30627	-0.350709	1.93297	0.43372	-0.530609	-0.283958	1.01669	0.531926	0.0237738	0.22859	0.0108853	-0.718979	2.62892	0.673539	0.253725	-0.429957	-0.666189	-0.431615	-0.673169	-0.61231	-0.0766771	0.874431	1.09311	-0.366251	-0.0416425	-0.442371	1.11733	1.44149
AACACACCACAAGCTT-1_1	Cancer_HGSOC1	39361	6525	20.9903	NA	NA	0	0	0.328912	Singlet	Tumor	Epithelial_cells	epithelial	1.93955	1.18682	0.0998931	1.65787	0.0094442	2.63748	2.92566	1.88152	0.942658	1.94895	1.09116	1.46984	0.997768	0.948063	-0.0210116	2.69065	1.95188	0.473817	1.04212	1.2283	2.31749	1.94196	1.30113	0.68255	0.975414	0.613125	1.28478	1.10216	-0.250184	0.525006	1.90439	1.31829	1.21301	1.12743	2.45855	1.09443
AACACACCACCCTTAC-1_1	Cancer_HGSOC1	45936	6681	6.779	NA	NA	1	1	0.320955	Singlet	Tumor	Monocyte	myeloid	-2.12968	1.62446	2.53476	1.69958	0.586343	1.1906	2.03483	2.44737	1.44691	1.34656	0.919205	3.20482	2.1364	4.04935	0.115399	1.12971	1.6903	1.2417	3.94108	1.42551	1.00969	2.29472	1.95899	2.67813	2.69668	3.21875	1.99337	2.35151	-2.2407	2.39883	3.49145	2.36528	1.70365	1.68675	0.84497	0.417147
AACACACGTCGCACGT-1_1	Cancer_HGSOC1	542	434	3.32103	NA	NA	0	0	0.217507	Singlet	Tumor	NK_cell	epithelial	-0.153983	-0.91465	-1.15656	-1.21566	-0.431796	-0.378022	-1.14333	-1.02188	-0.00252593	-0.921867	0.3129	-1.42161	-1.20113	-0.983938	0.115674	-0.61259	-0.829725	-1.14275	-1.08799	-0.70927	0.419589	-1.2008	-1.00437	-1.19671	-0.742124	-0.528947	-1.22598	-1.52328	1.00608	-0.530169	-0.959921	-1.22785	-1.2526	-0.718129	-0.158234	-1.05913
AACACACTCAAGTCGT-1_1	Cancer_HGSOC1	4111	1551	7.41912	NA	NA	3	3	0.190981	Singlet	Tumor	NK_cell	NK	0.0860542	-0.437919	0.469853	-0.36738	-0.503149	-0.532214	-0.453019	-0.0228533	0.0998794	-0.424772	-0.570234	-0.644369	-0.319379	-0.893357	-0.191654	-0.370778	-0.404275	-0.367905	-0.558204	-0.849428	-1.50016	-0.281559	-0.700076	0.367516	-0.587462	-0.257526	-0.179047	0.126301	0.566718	0.900228	-0.435119	-0.450697	-0.602118	0.22086	-0.340133	-0.0494098
AACACACTCCGCAACG-1_1	Cancer_HGSOC1	13394	3661	12.6923	NA	NA	1	1	0.271441	Singlet	Tumor	Monocyte	myeloid	0.721085	1.00236	1.36142	0.580453	-0.148298	0.631215	-0.0249996	1.14227	1.22639	1.01439	0.429539	1.24527	-0.0253361	-0.210185	-0.130559	0.481013	0.776328	1.2119	0.148847	-0.557922	0.568648	0.506908	0.524253	1.47306	2.87745	1.68002	0.293813	0.55356	-1.38562	1.48258	0.835879	0.429536	0.328085	-0.761934	-0.320826	0.708741
AACACACTCCGTCAAA-1_1	Cancer_HGSOC1	2489	1129	11.6111	NA	NA	3	3	0.234306	Singlet	Tumor	NK_cell	NK	-0.851242	-0.836436	-0.39014	-1.16435	-0.228219	-0.505095	0.563114	-0.443847	-0.0911405	-0.243119	-0.685579	-0.527246	-0.783194	-0.803921	-0.283293	-0.659246	-0.911432	-0.781401	-0.534604	-0.668107	-0.446772	-0.657926	-0.748668	-0.966082	-1.19331	-0.0655938	-1.06815	-0.702968	0.7474	-0.18853	-0.819745	-0.931037	-1.25399	-0.908628	-0.471952	-0.724536
AACAGGGAGAAGGCTC-1_1	Cancer_HGSOC1	1192	743	11.745	NA	NA	1	1	0.267905	Singlet	Tumor	Monocyte	myeloid	0.572069	-0.97635	-0.745351	-0.810955	-0.0969042	-0.815282	0.540153	-1.05528	-0.708547	-0.567988	-0.227397	-0.881294	-0.936223	-0.988455	-0.265287	-0.685722	-0.665341	-0.962798	-1.22055	-1.04472	-0.198374	-0.94176	-0.718628	-1.15946	-0.392041	-0.0190525	-0.915952	-1.01944	1.09726	0.68151	-0.945527	-1.16768	-1.39485	-1.10551	0.0885433	-0.969378
AACAGGGAGACGCAGT-1_1	Cancer_HGSOC1	6689	1909	8.22245	NA	NA	2	2	0.247569	Singlet	Tumor	T_cells	CD4T	-1.63794	-0.297676	0.521681	0.28162	-0.252434	-0.287331	0.710133	-0.00269305	0.179905	-0.913915	-0.244767	-0.727215	-0.788341	-0.47722	-0.49068	0.00708252	-0.0320356	-0.343356	-0.0626522	-0.0438066	-0.610927	-0.0400504	-0.027896	0.107781	0.18582	0.442374	-1.22194	-0.95424	-0.426054	1.02744	-0.180538	-0.0243806	0.17498	-0.441715	-0.472491	-0.843543
AACAGGGAGGTCGTAG-1_1	Cancer_HGSOC1	2677	1390	6.31304	NA	NA	3	3	0.156499	Singlet	Tumor	NK_cell	NK	-0.142291	-1.02474	0.350416	-0.860739	-0.364936	-0.785878	0.514145	-0.826074	-0.816782	-0.494648	-0.683643	-0.671717	-0.733478	-0.65595	-0.642115	-0.607154	-0.829596	-0.982232	0.0253421	-1.20187	-0.968309	-0.467618	-0.655819	-0.468138	-0.602615	-0.427918	-1.29695	-0.952262	0.235083	0.0583675	-0.197203	-0.815756	-0.81529	-0.526912	-0.471312	-0.11232
AACAGGGCACCGGAAA-1_1	Cancer_HGSOC1	2631	1135	13.721	NA	NA	4	4	0.226348	Singlet	Tumor	NK_cell	T	-0.0981346	-0.857375	-0.578975	-0.810342	-0.422073	-0.554287	-0.856857	-0.394115	-0.0738188	-0.165853	-0.374956	-0.948074	-1.1406	-0.678709	-0.27248	-0.557607	-0.695734	-0.856645	-0.581853	-1.19959	-0.0962858	-0.762769	-0.616642	0.0390355	-1.05237	-0.125262	-1.58692	-1.07575	0.92798	-0.222519	-0.50062	-0.821318	-1.28592	-0.880696	-0.296277	-1.04044
AACAGGGCAGACACCC-1_1	Cancer_HGSOC1	5373	1960	12.842	NA	NA	4	4	0.200707	Singlet	Tumor	NK_cell	T	0.708785	-0.447161	-0.244296	-0.130683	-0.567894	-0.368131	0.362766	0.542462	1.36448	1.01231	0.00821364	-0.171753	-0.311245	-0.09832	-0.683436	0.580512	-0.0595663	0.314916	0.0798688	-1.10607	0.0120816	0.422849	-0.149233	0.812703	0.787952	0.765533	-0.990089	-0.613892	-0.491908	0.224376	-0.138553	-0.201244	-0.24086	-0.256943	0.182548	-0.800784
AACAGGGGTCTTACTT-1_1	Cancer_HGSOC1	4969	1916	5.73556	NA	NA	2	2	0.231653	Singlet	Tumor	T_cells	CD4T	-1.62885	0.0851623	1.24576	-0.394201	-0.180036	-0.434688	0.311795	0.242672	-0.0312276	-0.183461	-0.672034	-0.337727	0.158514	0.0961003	-0.351822	-0.545094	-0.369106	-0.600048	-0.100719	-0.478028	-0.747645	-0.0708051	-0.16546	1.26057	0.708009	0.36163	0.427214	0.731669	0.0434639	0.751189	-0.101375	-0.228203	-0.0701667	-0.322553	-0.611018	-1.208
AACAGGGGTTTCGCTC-1_1	Cancer_HGSOC1	34693	6171	9.18629	NA	NA	0	0	0.305924	Singlet	Tumor	Epithelial_cells	epithelial	-1.14505	1.71999	-0.649796	1.8181	0.0445808	1.30449	-0.226369	1.73864	-0.250504	1.58059	0.415431	0.992802	1.6998	0.837697	-0.207308	2.64881	2.18821	1.78787	0.841958	1.53283	2.08595	1.7144	0.807088	0.42938	0.698537	-0.230552	2.34099	1.83228	-2.20226	-2.05263	1.51938	1.34164	1.40277	2.50614	2.06521	0.559782
AACAGGGTCAATCGGT-1_1	Cancer_HGSOC1	3128	1499	15.3133	NA	NA	4	4	0.194518	Singlet	Tumor	T_cells	T	-0.58422	-0.903672	0.162028	-0.792471	-1.15147	0.0388993	-1.38047	-0.628306	0.888068	-1.18786	-0.924094	-0.316959	-1.10611	-0.191275	-0.501416	-0.601218	-0.874392	-0.705006	-0.531341	-0.935207	0.606828	-1.04019	-0.99223	-0.810521	-0.518131	0.0040447	-0.720095	-0.198218	0.0163517	0.249898	0.0560409	-0.930222	-0.610444	-0.408011	-0.375352	0.0933346
AACCAACAGCTAAATG-1_1	Cancer_HGSOC1	8495	3051	5.72101	NA	NA	3	3	0.158267	Singlet	Tumor	NK_cell	NK	-1.02475	0.360368	0.553063	0.497538	-1.07051	0.26613	0.674491	0.0714018	-0.904632	0.0678546	-0.658258	0.547369	0.852145	0.913045	-0.743049	-0.651769	0.064807	0.120522	0.751554	-0.0682115	0.453113	0.377113	0.00313739	1.38569	0.456151	-0.0690374	-0.119102	0.439587	-0.546648	-0.484848	0.564932	0.694145	0.869133	0.774021	-0.559775	-0.000538845
AACCAACAGTGGCCTC-1_1	Cancer_HGSOC1	709	526	1.97461	NA	NA	0	0	0.217507	Singlet	Tumor	NK_cell	epithelial	2.95241	-1.03669	-1.20181	-1.34781	-0.441039	-0.841937	-1.17854	-1.27295	-0.632604	-0.864478	-0.433931	-1.14067	-1.20192	-0.670338	-0.212889	-0.827207	-1.22946	-1.0543	-0.966185	-1.15511	-0.765883	-1.07216	-1.50761	-1.60769	-1.59615	-1.12253	-1.75973	-1.68389	0.859773	-0.75368	-0.685215	-1.23846	-1.48661	-0.983634	-0.318827	-1.09251
AACCAACCAAGAGATT-1_1	Cancer_HGSOC1	2865	1252	13.1937	NA	NA	4	4	0.213086	Singlet	Tumor	T_cells	T	-0.990622	-1.06151	-0.68983	-0.255896	-0.830035	-0.63111	-1.28441	-0.397911	-1.23653	-0.203621	-0.977987	-0.839312	-0.90524	-0.504729	-0.180349	0.0631086	-0.0771524	-0.804694	-0.584582	-0.900862	-0.637844	-0.156414	-0.131276	-0.93519	0.0743717	-0.152223	-1.08063	-0.61467	0.474209	-0.943445	-0.494212	-0.529139	-0.750574	-0.628755	-0.83736	-0.586445
AACCAACCATACATCG-1_1	Cancer_HGSOC1	11412	3808	5.32773	NA	NA	5	5	0.167993	Singlet	Tumor	NK_cell	CD8T	0.00081698	0.165007	1.31667	0.658347	-1.33432	0.397748	1.84388	0.978477	1.52744	1.51047	-0.746912	0.708737	1.10548	2.27819	-0.474517	-0.418043	0.494682	0.717027	1.8069	-0.0543859	-0.213441	0.73992	0.16322	1.52842	-0.164705	0.427153	0.0507175	0.611958	0.0418957	1.24906	1.00339	1.19665	1.24969	1.09173	-0.197103	0.134383
AACCAACGTATTGACC-1_1	Cancer_HGSOC1	2355	1126	13.8004	NA	NA	4	4	0.189213	Singlet	Tumor	T_cells	T	0.645894	-1.15977	-1.28927	-0.498921	-0.658811	-0.824444	0.826406	-0.478604	-1.06604	-0.419914	-0.731636	-0.773172	-0.969168	-0.764314	-0.32972	-0.474401	-0.578857	-1.18836	-0.245179	-0.710062	-0.550409	-1.03506	0.0392667	-1.23969	-0.231115	-0.602003	-1.10734	-0.883033	1.26827	-0.463713	-1.03743	-0.893244	-1.01212	-0.738209	-0.299402	0.290298
AACCAACGTCGGTGTC-1_1	Cancer_HGSOC1	14598	3803	16.0227	NA	NA	0	0	0.328912	Singlet	Tumor	Epithelial_cells	epithelial	2.5782	0.57492	-0.861119	1.11774	1.52178	0.979598	1.48986	0.56629	-0.901169	0.803367	1.38018	0.0614795	0.475933	0.414472	-0.0231386	1.69723	1.80374	0.784853	0.318477	1.05234	0.977436	0.798883	0.264853	0.0589446	0.251391	-0.314721	-0.146279	-0.132529	0.671968	-1.16434	0.707698	0.502254	0.634586	0.687711	1.06724	-0.20203
AACCAACGTTCGGCTG-1_1	Cancer_HGSOC1	5257	2005	5.7257	NA	NA	2	2	0.211317	Singlet	Tumor	T_cells	CD4T	-1.01981	-0.417603	0.727449	-0.258124	-0.151732	-0.416505	-0.569089	0.0834738	-0.213622	-0.463838	-0.646436	0.0237406	-0.52072	-0.262998	-0.367888	-0.346339	-0.0927599	-0.389489	-0.0453432	-0.465849	-1.07987	-0.136762	0.10351	-0.00166013	-0.117436	-0.188169	-0.148529	0.122383	0.130911	0.336996	0.107209	-0.637819	-0.128017	-0.298131	-0.391686	-0.0822316
AACCAACTCGAAGGAC-1_1	Cancer_HGSOC1	11729	3058	15.0908	NA	NA	1	1	0.29443	Singlet	Tumor	Macrophage	myeloid	-1.71158	0.311003	0.691734	0.120134	0.896268	-0.15873	-0.438915	1.14855	0.0471354	0.524864	1.15	1.69171	0.0862376	0.0735303	0.0500565	0.257432	0.227472	-0.0439914	0.401881	0.498292	1.23529	0.217921	1.14781	1.06473	0.903986	2.67111	0.900801	0.743798	0.537299	1.55033	0.884463	0.442252	0.19296	-0.464081	0.613664	1.30539
AACCAACTCGAGTGGA-1_1	Cancer_HGSOC1	4745	2141	8.07165	NA	NA	3	3	0.217507	Singlet	Tumor	NK_cell	NK	0.773966	-0.655508	0.588937	-0.126429	0.855142	-0.0999195	-0.0426766	0.322186	-0.355952	-0.463255	-0.832258	0.0982653	0.0167346	-0.754217	-0.478592	-0.139873	0.156127	-0.706677	-0.426326	-0.883468	-1.21283	-0.26957	-0.720951	0.198405	-0.485693	0.283511	0.495595	0.273197	0.363271	-0.0428775	0.16236	-0.816323	-0.352317	-0.407135	-0.474429	-0.0555537
AACCAACTCGTTACCC-1_1	Cancer_HGSOC1	6677	2183	7.53332	NA	NA	2	2	0.214854	Singlet	Tumor	T_cells	CD4T	-0.75236	-0.143871	-0.0972324	-0.307367	-0.561686	-0.7087	-0.65298	0.487927	-0.806471	-0.0412457	-0.690929	-0.535562	0.0572552	0.402734	-0.666865	-0.273415	-0.443993	-0.443783	0.195202	-0.929785	-0.84979	1.19595	-0.430684	0.642025	-0.146756	0.737188	-0.566926	-0.303982	-0.0395381	0.235252	0.168632	-0.37202	0.0182461	-0.406101	-0.705448	0.385142
AACCACAAGATTGATG-1_1	Cancer_HGSOC1	2765	1189	0.650995	NA	NA	0	0	0.309461	Singlet	Tumor	Epithelial_cells	epithelial	1.03896	0.256503	-1.44059	-0.532664	-0.419895	-0.967185	-1.56358	-0.309526	0.828267	-0.214906	0.323421	-0.803364	-0.312024	-0.651917	-0.0169534	0.382341	0.0410777	0.340115	-1.10142	-0.221928	-0.992973	-0.409907	-0.780286	-0.489171	-0.893977	-0.909253	-0.22588	-0.776135	1.00707	-1.59189	-1.13612	-0.474126	-0.521716	-0.00903722	0.207419	-0.461159
AACCACAAGCGCAATG-1_1	Cancer_HGSOC1	3991	1504	17.1386	NA	NA	3	3	0.2458	Singlet	Tumor	NK_cell	NK	0.328887	-0.823401	-0.465894	-0.778767	-0.278182	-0.251062	0.847663	-0.959783	-1.1599	-0.832245	-0.612446	-0.670831	-0.59883	-0.23806	-0.602206	-0.801265	-0.730482	-0.908989	-0.40392	-1.32367	0.442056	-0.800204	-0.899025	-0.58272	-0.645713	-0.777082	-0.885532	-0.941589	0.263563	0.362623	-0.187137	-0.459342	-0.688207	-0.250702	-1.00073	-0.545119
AACCACACAAATGATG-1_1	Cancer_HGSOC1	4611	1875	7.48211	NA	NA	3	3	0.238727	Singlet	Tumor	NK_cell	NK	0.514906	-0.703635	0.687283	-0.816539	-0.612524	-0.310117	0.220248	-0.425637	-0.887411	-0.666343	-0.388779	0.362511	-0.296409	-0.336658	-0.497116	-0.904213	-0.874778	-0.58949	-0.0871622	-0.694698	-0.616105	0.540842	-0.37231	0.385329	-0.153605	-0.330752	-0.387075	-0.254786	-0.11615	0.00862665	-0.361211	-0.0564699	-0.281453	-0.898429	-0.0922264	-0.578882
AACCATGAGACGTCGA-1_1	Cancer_HGSOC1	10788	3311	21.1253	NA	NA	0	0	0.324492	Singlet	Tumor	Epithelial_cells	epithelial	-0.605014	0.692928	-0.831334	0.942726	-0.543283	1.31733	0.468997	0.0713481	0.144387	1.17303	0.348643	0.464535	-0.355335	-0.166972	-0.272262	1.63291	1.3706	-0.110418	0.0800824	0.418292	0.92328	0.0979321	0.632302	-0.96419	-0.830397	-1.02261	0.363842	0.31039	0.454253	-0.0503979	0.55495	0.537875	0.161868	1.2258	0.897015	0.884946
AACCATGAGGGCAGGA-1_1	Cancer_HGSOC1	6349	2543	8.04851	NA	NA	5	5	0.239611	Singlet	Tumor	T_cells	CD8T	-0.320657	-0.253503	1.67267	-0.421402	-0.849412	0.0516542	-0.0833649	-0.0219482	0.0207251	-0.426136	-0.909422	0.255914	-0.344818	0.218162	-0.545503	-0.716903	-0.153951	-0.125573	0.24499	0.0286012	0.153874	0.0478398	-0.0920154	-0.222163	0.868116	-0.209884	0.478716	0.707944	-0.303383	-0.741488	0.36616	-0.359789	0.135495	-0.136856	-0.728689	0.122279
AACCATGCACTGGACC-1_1	Cancer_HGSOC1	5619	1780	10.7848	NA	NA	8	8	0.220159	Singlet	Tumor	B_cell	B	1.01371	-0.623962	-0.407405	-0.516175	0.15484	-1.22014	-1.10593	-0.234857	-0.260556	-0.871868	-0.148008	-0.778117	-0.422232	-0.545342	0.191364	-0.505345	-0.86756	-0.856314	-0.782138	-0.335969	-0.291868	-0.66825	-0.46413	-0.90953	-0.725149	-0.388742	-0.0208499	0.00500471	0.210008	-0.0775781	-0.407571	-0.808442	-0.781845	-0.974952	-0.430962	-1.74671
AACCATGGTTCTTAGG-1_1	Cancer_HGSOC1	4069	1534	23.1998	NA	NA	1	1	0.338638	Singlet	Tumor	Macrophage	myeloid	1.45048	-0.466045	-0.273621	-0.856525	0.135542	-0.279959	-0.10693	-0.153066	-0.417774	0.113428	0.757896	0.870449	-0.764973	-0.563467	-0.210538	0.28648	-0.112076	-0.625201	-0.3628	-0.342481	-0.813666	-0.396661	0.0766624	0.859625	0.454797	0.708698	-0.962818	-0.724887	0.58667	1.06771	-0.175081	-0.507827	-0.849429	-1.07351	-0.291879	-0.583246
AACCATGTCCGTGGCA-1_1	Cancer_HGSOC1	5394	2040	23.3222	NA	NA	1	1	0.335986	Singlet	Tumor	Macrophage	myeloid	-1.71834	-0.451212	0.185509	0.462809	-0.635851	-0.470549	-2.03147	0.297599	0.482871	-0.517082	-0.213021	-0.0480535	-0.530801	-0.280117	-0.517747	-0.307168	0.0339527	-0.381892	0.175568	-0.490547	-0.0195753	0.0949079	-0.319611	0.360602	0.88349	1.13162	0.602112	0.365918	0.197707	0.517401	-0.0419784	-0.572423	-0.282926	-0.284715	-0.170982	0.578137
AACCATGTCGAACCAT-1_1	Cancer_HGSOC1	17186	4134	11.2359	NA	NA	9	9	0.26702	Singlet	Tumor	Monocyte	CD8T	-0.065833	1.20934	2.43087	0.392516	0.514265	0.988495	0.46503	1.4369	0.907282	0.534904	1.15803	2.92947	1.25886	0.831985	0.126941	-0.0459165	0.273268	1.11153	1.11602	0.419456	1.89268	0.970291	1.40106	1.80371	2.84777	2.9352	3.0874	3.28776	-1.0629	2.11061	0.625433	0.826305	1.08316	0.383358	0.779966	0.28282
AACCCAAAGCGCTGCT-1_1	Cancer_HGSOC1	4857	1917	3.76776	NA	NA	3	3	0.167993	Singlet	Tumor	NK_cell	NK	-0.74773	-0.294749	0.772669	-0.43752	-0.0502158	-0.164374	0.51497	-0.22605	-0.201534	0.149153	-0.808127	0.0825335	-0.27336	-0.25461	-0.151101	-0.400007	-0.335246	-0.292452	0.148317	-0.743103	-0.0913169	0.0511791	-0.074106	0.479907	-0.117186	0.0823127	-0.909026	-0.0351815	-0.439933	0.637744	0.0489729	0.11559	-0.169055	-0.410845	-0.689294	-0.225286
AACCCAAAGGTTCACT-1_1	Cancer_HGSOC1	4753	1775	18.704	NA	NA	1	1	0.31565	Singlet	Tumor	Monocyte	myeloid	0.693244	-0.62529	0.810236	0.296292	-0.207948	0.117406	0.547751	0.0415863	-0.321042	0.0289575	0.499901	1.3661	-1.05366	-0.611643	-0.218563	-0.149916	-0.517658	-0.596159	-0.429109	-0.902342	0.738648	-0.321383	0.0747286	0.315061	1.33713	2.95411	0.32796	0.830387	0.236664	1.31763	-0.677425	-0.469166	-0.696929	-0.545741	0.157556	1.18845
AACCCAAAGTCGCGAA-1_1	Cancer_HGSOC1	32098	2339	1.98455	NA	NA	15	15	0.220159	Singlet	Tumor	B_cell	B	-1.1309	0.15136	-0.190709	-0.431448	-0.542201	-1.13114	0.0200625	-0.0656513	-0.168923	-0.625565	-0.591853	-0.534871	-0.515668	0.0613508	-0.683927	0.114448	0.197169	0.0469139	-0.464465	0.10708	-1.55341	0.416738	-0.423771	-1.13406	-0.436531	-0.31733	-0.909963	-0.77081	0.553072	-1.09584	-0.350055	-0.191558	0.163312	0.395115	-0.655012	-1.92452
AACCCAAGTCGAATGG-1_1	Cancer_HGSOC1	6628	2183	11.8135	NA	NA	1	1	0.236074	Singlet	Tumor	Macrophage	myeloid	-0.135617	-0.223393	0.671021	-0.402202	-0.562754	-0.161477	0.136873	0.618369	1.2237	-0.367056	0.990584	0.634735	-0.584229	-0.512723	-0.0121175	0.379665	0.122168	0.107795	-0.389511	-0.562564	0.148778	0.549609	0.102178	0.79918	1.70481	2.04293	0.167369	0.589551	0.663245	0.86985	-0.350865	-0.0474074	-0.516841	-0.566966	0.143611	0.698028
AACCCAAGTCGTCGGT-1_1	Cancer_HGSOC1	1982	1040	13.6731	NA	NA	2	2	0.167109	Singlet	Tumor	T_cells	CD4T	-0.745006	-1.27077	-0.292642	-0.583737	0.218622	-0.873637	0.0534744	-0.197036	-0.00113496	-0.627421	-0.945013	-1.55335	-1.07628	-0.0954211	-0.172271	-0.204993	-0.309304	-0.674858	-0.0217883	-0.772077	-1.22213	-0.986518	-0.799785	-0.725611	-0.556738	-0.545892	-0.671701	-0.863905	0.783883	0.683685	-0.554298	-0.876441	-1.06541	-1.08257	-0.631861	0.403182
AACCCAAGTTAGGCCC-1_1	Cancer_HGSOC1	10420	3130	14.904	NA	NA	1	1	0.279399	Singlet	Tumor	Macrophage	myeloid	-0.587054	0.60575	1.54321	0.62139	1.20789	0.0671044	-0.277821	0.148799	-2.03622	0.0356925	2.01153	1.96737	0.199638	-0.125053	0.223975	0.186699	0.339132	0.660043	0.429004	-0.0802806	1.39527	0.0583872	0.256443	1.73157	1.72325	2.18976	1.26493	1.37254	0.429612	1.83425	0.568698	0.487839	0.524551	0.301891	0.931283	0.456955
AACCCAATCAATCTCT-1_1	Cancer_HGSOC1	10294	3103	11.9584	NA	NA	1	1	0.267905	Singlet	Tumor	Macrophage	myeloid	-0.720316	0.182135	0.361449	0.280489	0.097556	0.433799	-0.0292748	0.641744	-0.976855	-0.074976	1.64514	1.40351	0.317118	0.152893	0.18015	-0.369692	-0.408395	0.0335704	-0.182453	0.0797744	0.471872	0.635782	0.492071	1.01972	1.01503	1.50871	-0.0611282	0.282476	-0.0507047	1.48217	0.668844	0.65514	-0.451045	-0.771698	0.282854	1.51602
AACCTGACAGTCTTCC-1_1	Cancer_HGSOC1	2263	958	11.2682	NA	NA	9	9	0.199823	Singlet	Tumor	T_cells	CD8T	-0.637856	-1.33678	-0.51248	-0.560388	-0.86858	-0.776583	-1.41737	-1.25759	-0.341159	-1.03107	-0.910131	-0.508695	-1.03204	-0.631385	-0.631882	-0.684575	-0.738679	-1.38894	-0.633297	-1.12539	-1.16028	-0.609878	-0.996263	-1.21765	-0.240323	-0.333499	0.848899	0.631301	0.727171	-0.328796	-0.662192	-1.11177	-1.35603	-0.857415	-0.903565	-1.31167
AACCTGACAGTTAGGG-1_1	Cancer_HGSOC1	10176	3202	7.17374	NA	NA	1	1	0.26702	Singlet	Tumor	Monocyte	myeloid	-0.854749	0.627007	1.00523	-0.222553	1.01586	0.164715	-0.461472	0.804269	-0.803284	-0.236507	1.26368	1.6375	0.434396	0.302627	-0.256347	0.0104823	0.360329	0.455922	-0.0567027	-0.302672	0.534522	0.743748	0.0600808	1.1979	1.18915	1.61907	0.0338619	0.0324215	-0.437792	1.64628	0.886317	0.343624	0.144274	-0.105911	0.871049	1.22716
AACCTGATCACCGCTT-1_1	Cancer_HGSOC1	4429	1706	9.93452	NA	NA	2	2	0.201592	Singlet	Tumor	T_cells	CD4T	0.337222	-0.536978	0.405435	-0.194997	-0.691	-0.241655	1.52811	-0.0579379	-0.798376	-0.928456	-0.517008	-0.337314	-0.651955	-0.279164	-0.30522	-0.615406	-0.569362	-0.82579	-0.377804	-0.679707	-0.26674	-0.194437	0.625719	0.896092	0.260877	-0.585917	-0.924439	-0.53192	-0.0187349	-0.0607653	-0.311475	-0.65483	-0.355682	-0.447878	-0.530569	-0.808599
AACCTGATCAGCTTGA-1_1	Cancer_HGSOC1	5361	2229	8.71106	NA	NA	3	3	0.158267	Singlet	Tumor	NK_cell	NK	1.56004	-0.382706	1.61021	0.504802	-0.704758	-0.168467	-0.309721	-0.226733	-2.01787	-0.108864	-0.838107	0.303732	-0.242425	-0.223499	-0.35398	-0.228356	-0.57925	-0.403551	-0.304174	-0.793881	0.188938	-0.470858	-0.30726	-0.167049	-0.187065	-0.103078	-0.745485	-0.177621	0.205438	0.0660549	-0.0201618	-0.349941	0.0303156	-0.351803	-0.476586	-0.921508
AACCTGATCGCCGATG-1_1	Cancer_HGSOC1	4967	1758	12.8649	NA	NA	1	1	0.268789	Singlet	Tumor	Macrophage	myeloid	-0.326084	-0.518059	0.621376	-0.356302	-1.29599	-0.766187	-1.00708	-0.0429686	-1.05344	-1.19058	0.295347	0.239549	-0.486489	-0.111839	-0.584036	-0.37128	-0.493807	-0.834574	-0.248754	-1.26835	-0.727153	0.30448	-0.465158	-0.451572	1.87457	1.06713	-0.296535	-0.0260533	0.423305	0.953906	-0.536513	-0.861155	-0.521926	-0.430612	-0.281129	-0.115175
AACCTGATCTGTCGCT-1_1	Cancer_HGSOC1	5317	1742	24.3746	NA	NA	9	9	0.213086	Singlet	Tumor	T_cells	CD8T	0.414766	-0.838275	1.3323	-0.838481	-0.716959	-0.544883	-1.08494	-0.151413	-0.563713	-0.944206	-1.27482	0.0161422	-0.388308	-0.27045	-0.691375	-0.440491	-0.425037	-0.796098	-0.197459	-0.504118	0.635991	-0.422102	-0.740153	-0.908358	-0.178906	-0.250933	1.792	1.48658	0.633023	-0.205968	-0.7221	-0.412239	-0.141055	-0.636919	-0.766909	-0.339154
AACCTTTAGACGAGCT-1_1	Cancer_HGSOC1	2485	1248	6.63984	NA	NA	3	3	0.198939	Singlet	Tumor	NK_cell	NK	-0.966868	-0.988773	0.185332	-0.814741	-0.69817	-0.518625	-0.250004	-0.343027	1.0437	-0.799049	-0.392458	-0.0683267	-0.804935	-0.522431	-0.458057	-0.367505	-0.0746175	-0.889846	-0.481406	-0.79455	-1.33959	-0.906757	-0.127316	0.107872	0.0523857	-0.744498	-1.48706	-1.08772	0.538935	-0.588183	-0.40449	-0.716499	-0.849979	-0.209979	-0.378349	-1.21972
AACCTTTGTAGTCCTA-1_1	Cancer_HGSOC1	3925	1796	3.10828	NA	NA	3	3	0.191866	Singlet	Tumor	NK_cell	NK	-0.811569	-0.88444	0.915037	-0.184366	-0.315583	0.0591291	1.08331	-0.135376	-0.268833	-0.0284399	-0.619957	-0.278742	-0.560152	0.0146703	-0.392487	-0.325971	-0.532586	-0.694533	0.0709017	-0.479832	-0.329675	0.0436173	0.00264149	-0.273674	-0.251717	0.505896	-0.47849	-0.168251	0.782445	-0.0804007	-0.198857	-0.0992751	-0.380736	-0.572455	0.00704748	-0.0324333
AACCTTTGTAGTTAGA-1_1	Cancer_HGSOC1	4153	1567	8.16277	NA	NA	5	5	0.254642	Singlet	Tumor	T_cells	CD8T	0.226078	-0.239178	0.468822	-0.389989	-1.05344	0.0501363	-0.733624	0.122166	-1.39516	-1.03147	-0.933625	0.103749	-0.316924	-0.566045	-0.401086	-0.585752	-0.391657	-0.142308	-0.828321	-0.469295	-0.0943889	-0.326537	0.0478727	0.681533	-0.595785	-0.196005	-0.0519205	0.0597122	-0.315893	-0.284054	-0.311925	-0.228507	-0.476723	-0.508684	-0.247717	-0.402404
AACCTTTGTGTTGAGG-1_1	Cancer_HGSOC1	3139	1663	9.23861	NA	NA	5	5	0.254642	Singlet	Tumor	T_cells	CD8T	-0.0782587	-0.948062	1.16071	-0.518952	0.137148	-0.175926	1.77177	-0.868182	-1.31465	-0.722323	-0.636534	0.403443	-0.346887	-0.000889691	-0.424946	-0.478952	-0.352191	-0.627862	-0.22303	-0.413376	-0.172815	-0.342966	-0.747844	0.399263	0.0764757	-0.125226	0.316828	0.32033	0.482759	-0.551964	0.142851	-0.556366	-0.686519	-0.495188	-0.43272	-1.10922
AACCTTTTCACTCACC-1_1	Cancer_HGSOC1	4352	2011	4.15901	NA	NA	3	3	0.244032	Singlet	Tumor	NK_cell	NK	0.143052	-0.248036	0.697035	-0.760453	-0.792305	-0.427566	-0.136111	0.066412	-0.69038	-0.391102	-0.722682	-0.408626	-0.559126	0.178125	-0.540722	-0.357972	-0.512235	-0.471504	-0.0180368	-0.598356	-0.0313758	-0.0559291	-0.288069	1.06661	-0.482528	0.424326	0.343968	0.114083	0.425064	0.155832	-0.0480263	-0.0933415	-0.0905488	0.107081	-0.341251	-0.765433
AACCTTTTCCCGAGAC-1_1	Cancer_HGSOC1	21714	5230	6.56719	NA	NA	7	7	0.202476	Singlet	Tumor	NK_cell	CD8T	-1.30108	1.18051	2.07361	1.52677	-1.34337	1.17932	1.59381	0.904378	0.704181	1.10063	-1.33641	0.908026	1.16262	2.64531	-0.899238	0.142509	0.517664	1.1421	4.11378	0.169161	1.51501	0.434826	-0.258466	1.27499	0.810561	0.267488	0.902879	1.18667	-1.68801	-0.443694	3.40987	1.5551	1.33497	0.709822	-0.142066	0.11164
AACCTTTTCCGCAAAT-1_1	Cancer_HGSOC1	5177	1862	13.4054	NA	NA	1	1	0.304156	Singlet	Tumor	Monocyte	myeloid	0.76598	-0.124303	-0.0778184	-1.02856	-0.249689	-0.00141703	-0.915591	0.138167	0.246967	0.185397	0.80767	1.08941	-1.16773	-0.458993	-0.493863	-0.139854	-0.158898	-0.666234	0.00952144	-0.402901	1.07232	-0.0307092	-0.0122222	0.199637	-0.064771	1.0463	-0.277722	-0.11149	0.84754	0.552172	-0.168718	-0.747686	-0.934781	0.142315	-0.136077	-0.296691
AACGAAAGTACGATCT-1_1	Cancer_HGSOC1	1544	1030	5.05181	NA	NA	0	0	0.262599	Singlet	Tumor	Epithelial_cells	epithelial	-0.729677	-0.771084	-0.980073	-0.704267	-0.413894	-0.499077	-0.0129538	-0.525701	1.03374	-0.580691	-0.00482088	-0.696265	-0.802954	-0.585251	-0.172482	-0.0982317	-0.305582	-0.937662	-0.717965	-0.110796	-0.740231	-0.555678	-0.188368	-0.768192	-0.736828	-1.14731	-1.41845	-1.35569	0.759419	-0.740109	-0.671223	-0.365319	-0.985736	-0.439455	-0.113807	-0.398537
AACGAAATCACACCCT-1_1	Cancer_HGSOC1	11950	3901	5.95816	NA	NA	7	7	0.2458	Singlet	Tumor	NK_cell	CD8T	0.0178341	0.464698	1.29499	1.0387	-1.31436	-0.252894	-0.127496	0.955925	0.612478	-0.150956	-0.416643	0.77514	0.917465	3.23279	-0.380075	-0.101636	0.0307582	0.42712	3.19432	0.391707	-1.04892	0.53312	0.32313	0.423819	0.333227	0.0652404	0.64033	0.574815	-1.14478	0.293951	2.39774	0.774561	1.11717	0.640381	-0.742686	-1.19845
AACGAAATCACCGCTT-1_1	Cancer_HGSOC1	16200	4306	5.19753	NA	NA	1	1	0.251989	Singlet	Tumor	Macrophage	myeloid	-1.80689	1.1376	0.981423	0.823257	-0.718617	0.337341	-0.378347	0.971267	0.543323	0.437007	0.992284	1.35122	0.471832	0.273546	-0.29109	0.018313	0.398865	0.604237	0.523925	0.390931	1.07449	1.44088	0.375218	0.476485	1.61634	1.13613	0.687018	0.486509	-0.852545	1.83214	0.872828	0.37259	0.568093	0.0804824	0.354592	-0.945064
AACGAAATCAGCTTCC-1_1	Cancer_HGSOC1	20385	4423	24.8075	NA	NA	0	0	0.313882	Singlet	Tumor	Epithelial_cells	epithelial	0.162063	0.505644	-0.980076	0.925129	0.575042	0.90561	-0.186616	0.856329	0.70353	0.700396	1.37268	-0.0474027	0.344843	0.273184	0.0514026	1.45335	1.85855	0.38764	-0.0218465	-0.101785	2.01538	1.10492	1.17394	-0.304468	-0.174637	-0.75852	0.333407	0.416914	0.0712314	-0.330848	1.27194	0.581316	0.441387	0.980534	1.95206	-0.026161
AACGAAATCCTAGCTC-1_1	Cancer_HGSOC1	4924	1967	4.42729	NA	NA	3	3	0.184792	Singlet	Tumor	NK_cell	NK	-1.45947	-0.782265	0.215097	-0.669478	-0.596827	-0.456946	0.803479	-0.206911	-1.05309	0.351138	-0.892652	0.206038	-0.0763106	-0.000347538	-0.385806	-0.43491	-0.243919	-0.0825813	0.00353722	-0.196301	-1.16394	-0.591687	-0.383322	0.603862	-0.450247	0.52588	-0.345529	-0.33708	-0.406129	-0.0832643	-0.518045	-0.233306	-0.0743175	-0.854398	-0.187508	-0.840243
AACGAAATCGCACTCT-1_1	Cancer_HGSOC1	7557	2879	7.43681	NA	NA	5	5	0.210433	Singlet	Tumor	T_cells	CD8T	-0.990068	0.0518425	1.16741	-0.613557	-0.522283	-0.0510713	0.459707	-0.0346086	0.635412	-0.801892	-0.737112	0.18123	-0.126226	-0.0375781	-0.490621	-0.445719	-0.683584	-0.802126	0.446674	-0.827506	0.423263	0.0158164	-0.244707	-0.0605733	0.500935	0.164359	0.251773	0.833743	-0.333304	-0.688147	0.61449	-0.0477679	0.169232	-0.231916	-1.10374	-0.697995
AACGAAATCGCCAGAC-1_1	Cancer_HGSOC1	7034	2127	9.90901	NA	NA	9	9	0.230769	Singlet	Tumor	T_cells	CD8T	-1.61728	-0.25004	1.05602	-0.733969	-0.664957	-0.34417	-0.0849821	0.0998207	-0.717042	0.173199	-0.540626	-0.108291	-0.445116	-0.315052	-0.462428	0.111301	-0.223433	0.160854	-0.508547	-0.639509	-0.0471497	-0.081863	0.217245	0.747329	0.824425	-0.0546246	1.85393	1.7172	-0.138069	0.00956479	-0.0375528	-0.186613	0.272387	-0.354326	-0.11589	-0.173799
AACGGGAAGCCTGCCA-1_1	Cancer_HGSOC1	5310	1928	6.93032	NA	NA	3	3	0.148541	Singlet	Tumor	NK_cell	NK	-0.329528	-0.198832	0.594271	-0.0744219	-0.579115	0.142083	-0.0934518	-0.220983	-0.73925	-0.296793	-0.629105	-0.188375	-0.501901	-0.662987	-0.444428	-0.307893	0.0695388	-1.12003	-0.322499	-0.507364	-0.558187	-0.0545066	-0.221408	0.0297782	0.515516	-0.115874	-0.484929	0.133192	0.56063	0.409917	-0.180993	0.285347	-0.00502075	0.0604001	0.203125	-0.776163
AACGGGACAAAGCTCT-1_1	Cancer_HGSOC1	3812	1759	2.70199	NA	NA	5	5	0.200707	Singlet	Tumor	T_cells	CD8T	-1.46221	-0.472726	0.972179	-0.190929	-0.468036	-0.310127	0.014489	0.00719156	-0.629108	-0.573638	-0.220529	0.470245	-0.276798	-0.38245	-0.533633	-0.513785	-0.693923	-0.804654	-0.162629	-0.418468	0.31317	0.135313	-0.000983038	-0.190994	-1.17939	-0.432525	-1.16483	-0.406611	0.298106	0.120471	0.279277	-0.0595312	-0.28756	-1.02158	-0.487955	-0.400626
AACGGGAGTCACAGTT-1_1	Cancer_HGSOC1	10236	2804	8.76319	NA	NA	1	1	0.244032	Singlet	Tumor	Macrophage	myeloid	-0.381937	0.379097	0.657566	-0.40774	-0.834737	0.129148	-0.26281	0.890298	-1.56425	0.302797	1.10364	1.4182	0.372311	-0.295187	-0.344984	0.0576422	0.503912	-0.207496	-0.261968	0.157078	0.23739	0.188888	0.416605	0.752362	0.802923	1.08116	-0.187007	0.0448455	-0.474679	1.88091	0.0588	0.336917	0.172124	-0.510811	-0.210311	1.473
AACGGGAGTCCCTAAA-1_1	Cancer_HGSOC1	2950	1287	9.89831	NA	NA	2	2	0.205128	Singlet	Tumor	T_cells	CD4T	-0.227855	-1.17039	-0.837425	-0.562712	-0.695425	-0.959062	-0.315593	-0.585268	-0.264428	-0.838698	-0.480697	-0.474753	-1.122	-0.363871	-0.691637	-0.802259	-0.633431	-0.791926	-0.103496	-0.714086	0.535243	-0.608484	-0.491944	-1.01934	-0.141934	-0.497706	-0.418913	-0.591095	0.319694	-0.18444	-0.527371	-1.16906	-0.868469	-0.814855	-0.437283	-1.48066
AACGGGAGTGCCCTTT-1_1	Cancer_HGSOC1	7091	2348	6.03582	NA	NA	3	3	0.162688	Singlet	Tumor	NK_cell	NK	-0.545766	-0.0160317	1.26839	0.0921051	-0.509809	-0.5649	-0.671464	0.944589	-0.627903	-0.254007	-0.146297	0.689777	-0.015841	0.256377	-0.103369	-0.377829	-0.369793	0.441717	0.0474211	-0.233193	-1.3027	0.218925	0.165039	1.46873	1.65071	0.0511615	1.97134	2.28804	-0.437188	0.125887	-0.465943	0.096956	0.0849104	0.933296	-0.405536	-0.309562
AACGGGATCGAAGCCC-1_1	Cancer_HGSOC1	6014	1853	7.86498	NA	NA	2	2	0.225464	Singlet	Tumor	T_cells	CD4T	-0.0362754	-0.27231	0.0913884	-0.274623	-0.782829	-0.00673062	0.611901	-0.281047	-0.816275	0.102395	-0.703823	-0.184619	-0.224069	-0.134638	0.0219263	0.278826	-0.3517	0.0523468	-0.31262	-0.221489	-0.861197	-0.287574	-0.272111	-0.382118	-0.289779	0.40534	-0.504538	-0.917569	0.0342303	0.619807	-0.582267	-0.44124	0.27254	-0.18543	-0.316776	-0.557155
AACGGGATCTCACCCA-1_1	Cancer_HGSOC1	13798	3898	9.32019	NA	NA	3	3	0.155615	Singlet	Tumor	NK_cell	NK	0.396327	0.395305	1.71981	0.244336	-1.19816	0.026877	0.997481	0.674447	1.51602	0.792953	-0.854931	0.661419	1.28062	1.80991	-0.567039	0.207028	0.545964	0.783841	1.49472	0.552731	-0.327283	0.98413	0.30474	1.59297	0.0291095	-0.00882731	-0.0453589	0.514528	-1.64108	-1.37258	0.954842	1.15528	1.57533	2.32039	-0.406775	0.703228
AACGTCACAACTAGAA-1_1	Cancer_HGSOC1	16742	4403	18.4864	NA	NA	0	0	0.334218	Singlet	Tumor	Epithelial_cells	epithelial	2.39549	0.758016	-0.36388	1.81795	0.894426	1.10274	1.43751	1.61471	-1.20778	1.86527	1.10755	0.102967	0.740772	2.04807	0.443384	1.78334	1.89848	0.583762	2.17852	0.840762	3.05498	0.786378	1.13966	0.955272	-0.0358605	-0.0135321	-0.0315244	0.235647	-0.187031	-0.274059	1.7254	1.57106	0.808599	2.48553	1.70557	1.59113
AACGTCACATAACAGA-1_1	Cancer_HGSOC1	1027	667	17.7215	NA	NA	1	1	0.254642	Singlet	Tumor	Monocyte	myeloid	0.338725	-1.15401	-0.990672	-1.11309	0.568739	-0.999632	0.0886275	-1.23449	-0.570002	-0.673876	0.600793	-0.651729	-1.21757	-1.03974	-0.191554	-0.64636	-0.886117	-1.00083	-0.973529	-1.12252	-0.722523	-0.606215	-0.677483	-1.39979	-1.35305	-0.804702	-1.26114	-1.33528	1.17852	0.0984969	-0.772377	-0.97259	-1.31563	-0.64203	-0.215546	-0.91413
AACGTCAGTAGCTGCC-1_1	Cancer_HGSOC1	5301	2086	5.1877	NA	NA	3	3	0.142352	Singlet	Tumor	NK_cell	NK	0.333189	-0.761898	0.892041	-0.209876	-0.845259	-0.260472	0.532992	-0.324203	-0.60728	-0.0926725	-1.30261	-0.423828	-0.0298385	-0.343302	-0.358806	-0.5157	-0.107255	0.115486	-0.0962887	-0.178033	0.297722	-0.648377	-0.28389	0.165042	0.245601	0.0951754	-0.689478	-0.357315	-0.39782	-0.962013	-0.297697	0.172519	-0.10679	0.346334	-0.503255	-0.394147
AACGTCAGTCATTGCA-1_1	Cancer_HGSOC1	5223	1616	19.0504	NA	NA	3	3	0.248453	Singlet	Tumor	T_cells	NK	0.213002	-0.751612	0.339181	-0.627838	0.787783	-0.818899	-0.338553	-0.510284	0.742397	-0.4937	-0.62375	-0.340841	-0.0677349	-0.06823	-0.68384	-0.287896	-0.113548	-0.857002	-0.399967	-0.717956	-0.220573	-0.361415	-0.40385	-0.213851	0.0614015	0.185379	-1.2192	-0.537531	0.488469	0.133612	-0.667442	-0.576895	0.0853163	-0.16897	-0.156744	0.234414
AACGTCATCATTTACC-1_1	Cancer_HGSOC1	12324	3578	8.19539	NA	NA	1	1	0.255526	Singlet	Tumor	Macrophage	myeloid	0.565828	0.636668	0.760928	1.31511	-0.0965459	0.6262	-0.624055	1.3074	0.657329	0.317325	1.21719	1.73037	0.681265	0.0698424	0.104399	-0.0303731	0.806752	0.470018	0.268116	-0.234242	1.57383	0.972379	0.704266	0.67781	0.955678	2.0143	0.649933	0.649934	-1.36611	2.00219	1.10821	0.399158	0.457952	-0.470492	0.352751	0.651159
AACGTCATCCTGTTGC-1_1	Cancer_HGSOC1	7726	2345	9.81103	NA	NA	1	1	0.237843	Singlet	Tumor	Macrophage	myeloid	1.59298	0.066289	0.461889	-0.830607	-0.104625	-0.880951	0.303535	0.281726	0.0328419	-0.142286	0.309323	0.822979	-0.0161557	-0.141509	0.031414	-0.304344	-0.0916851	0.000453606	-0.249282	-0.525068	1.30891	0.179942	0.30776	-0.0349461	0.673161	1.16327	-0.210482	0.270482	-0.101441	1.42927	-0.303391	-0.174399	-0.0937849	-0.0872958	-0.395825	0.0520244
AACTTCTGTGCTGATT-1_1	Cancer_HGSOC1	6313	2338	18.1847	NA	NA	1	1	0.308576	Singlet	Tumor	NK_cell	myeloid	-1.73743	-0.52501	0.866175	0.247271	-0.547867	-0.380916	-0.42237	0.184533	-0.940786	-0.0762952	0.707912	0.497765	-0.435733	-0.228498	-0.608043	-0.681786	-0.234601	-0.698624	-0.0528462	-0.40773	0.560669	0.0921662	-0.00040285	0.402608	1.74869	0.145566	0.686303	0.877681	1.29006	0.273921	0.247144	-0.184776	-0.294316	-0.805353	-0.254652	-0.283068
AACTTCTTCATCCTGC-1_1	Cancer_HGSOC1	5003	2243	6.71597	NA	NA	3	3	0.208665	Singlet	Tumor	NK_cell	NK	1.1594	-0.57464	0.69295	-0.582785	-0.638034	-0.342665	0.610878	-0.219448	0.353298	-0.500372	-1.08329	-0.492747	-0.565687	-0.472727	-0.397323	-0.321381	-0.54026	0.0649886	-0.277261	-0.341578	-0.712702	-0.241592	-0.0555598	0.12812	-0.314849	-0.0982723	-1.04957	-0.487978	-0.0767073	0.825002	0.100443	-0.502249	-0.202125	-0.133731	0.478324	0.0863706
AACTTCTTCGCTTACC-1_1	Cancer_HGSOC1	33309	5964	16.6772	NA	NA	0	0	0.289125	Singlet	Tumor	Epithelial_cells	epithelial	1.63559	1.76417	-1.04494	2.3354	1.22999	1.91027	1.38184	1.09866	1.05161	1.73021	1.77758	0.598341	1.43515	0.698931	0.0927592	2.56624	2.27697	1.26227	0.84383	0.7185	1.62009	1.86172	0.828618	0.415892	0.0741296	-0.224511	-0.664419	-0.194994	-0.565086	-0.367713	1.88618	1.22568	1.22613	1.8126	1.61754	1.38396
AAGAACAAGAATAGTC-1_1	Cancer_HGSOC1	12767	3132	12.4618	NA	NA	1	1	0.251105	Singlet	Tumor	Monocyte	myeloid	-0.506728	0.591713	1.18379	0.206029	0.630569	-0.037792	0.215444	1.38438	1.3642	0.588639	0.631681	0.948687	0.534826	-0.347875	-0.060974	0.179273	0.341729	0.899834	0.0730041	-0.464761	-0.164672	0.567503	1.05038	1.37929	2.41498	1.98706	1.33926	1.38501	-0.417193	2.33845	-0.0420948	0.451258	0.314421	-0.59735	-0.0955456	0.721661
AAGAACAAGCATTTGC-1_1	Cancer_HGSOC1	25456	4967	21.6923	NA	NA	0	0	0.307692	Singlet	Tumor	Epithelial_cells	epithelial	-0.84894	0.84168	-0.390735	0.96964	1.03654	1.14093	1.57827	0.839021	-0.0714853	1.64735	1.56199	0.661363	0.929419	0.550331	0.735372	2.37334	1.49397	0.449838	1.15709	0.975155	1.99763	0.789161	1.06135	1.01211	0.415246	-0.378605	0.567405	0.360202	-0.23874	0.353845	1.36018	0.689863	0.938242	1.55001	1.85718	0.13307
AAGAACAAGCTAGTTC-1_1	Cancer_HGSOC1	5947	1864	12.3255	NA	NA	3	3	0.21397	Singlet	Tumor	NK_cell	NK	0.362952	-0.482807	0.4338	-0.989456	-0.547937	-0.506545	0.975608	-0.373652	-0.395059	-0.555827	-0.0912647	-0.389761	-0.276081	-0.52735	-0.447415	-0.357018	-0.0747478	-0.655093	-0.493145	-0.566257	-0.044397	-0.341127	-0.139627	0.193945	0.458017	-0.460688	0.169272	0.610763	0.734418	-0.321972	-0.0242373	-0.744206	-0.210763	-0.734568	-0.299337	-0.61544
AAGAACAAGTTGCGAG-1_1	Cancer_HGSOC1	40574	5859	17.7971	NA	NA	0	0	0.308576	Singlet	Tumor	Epithelial_cells	epithelial	1.14377	1.49595	-0.89702	1.34249	1.73928	1.69865	0.479955	1.5529	0.124377	2.0119	0.349388	-0.0742302	1.7311	0.523697	0.311981	2.34546	2.67609	1.47551	0.471901	1.22696	1.11322	1.51995	1.35377	0.855067	0.0410035	-0.0269974	0.0181002	0.154463	-1.45513	-0.533295	1.7218	1.37811	1.3488	0.735337	1.88711	0.574245
AAGAACACAAGACGAC-1_1	Cancer_HGSOC1	39014	6490	6.22597	NA	NA	1	1	0.298851	Singlet	Tumor	Macrophage	myeloid	-0.879355	1.95542	1.64087	1.34349	1.50292	1.68558	2.28516	2.52724	-0.522385	1.47469	1.14129	2.89481	1.79037	3.02297	-0.10669	0.839616	1.51799	1.73375	3.41575	1.15196	0.988299	2.05906	1.69703	2.27162	2.30183	2.82946	1.53048	2.20236	-3.53417	2.71809	2.81557	2.15851	1.66406	1.67705	-0.0322878	2.19519
AAGAACAGTCGTATTG-1_1	Cancer_HGSOC1	5334	2321	2.08099	NA	NA	3	3	0.186561	Singlet	Tumor	NK_cell	NK	-0.30462	-0.32396	1.12427	0.321107	-0.794087	0.0641061	0.525664	0.448239	0.100059	-0.305168	-0.831641	1.08689	-0.0838246	-0.00401716	-0.112246	-0.505455	-0.871254	-0.0917438	-0.0227481	-0.356842	0.423598	-0.395967	-0.342842	0.754308	0.317797	0.0137253	0.19206	0.625279	0.0523718	-0.137967	-0.222174	-0.20418	-0.0602897	0.227446	-0.456802	-0.0272517
AAGAACATCATTGCTT-1_1	Cancer_HGSOC1	19896	4091	16.6114	NA	NA	1	1	0.26702	Singlet	Tumor	Macrophage	myeloid	0.506819	0.15827	1.00612	0.72658	0.754181	0.662447	1.70608	1.57013	-0.0631746	0.0610092	1.29634	2.18564	0.844423	2.95376	0.00230745	0.331927	0.435156	0.362849	3.03397	0.301986	-0.0596894	1.15329	0.782362	1.00158	2.16111	2.45142	1.15257	1.45246	-0.523842	2.30133	2.79842	0.614941	0.334975	0.12671	0.0575415	-0.590604
AAGACAAAGACCATTC-1_1	Cancer_HGSOC1	901	547	9.54495	NA	NA	4	4	0.206012	Singlet	Tumor	NK_cell	T	0.616158	-1.25549	-0.561399	-1.35279	-0.594124	-0.860625	-1.21694	-1.00569	-0.828341	-0.508564	-0.202544	-1.1157	-1.3055	-0.946888	-0.457088	-0.357189	-0.459067	-1.31456	-0.597412	-1.12386	-0.986912	-1.18301	-0.906845	-0.725778	-1.20677	-0.966427	-1.25973	-1.46404	1.4796	-0.419191	-0.747011	-1.3693	-1.69281	-1.10446	-0.0315053	-0.864243
AAGACAAAGACTAGAT-1_1	Cancer_HGSOC1	4681	1773	7.39158	NA	NA	9	9	0.197171	Singlet	Tumor	NK_cell	CD8T	0.808946	-1.09368	0.671797	-0.475686	-0.713415	-0.506902	-0.352102	0.185513	-1.48822	-0.465486	-0.43721	-0.101073	-0.620966	-0.510814	-0.401761	-0.366091	-0.40614	-0.676763	0.194869	-0.940558	-0.339251	-0.358989	-0.210812	0.270129	0.173506	-0.322382	2.2485	1.93063	0.962171	-0.396553	0.0292278	-0.524662	-0.526826	-0.478344	-0.0164312	-1.20647
AAGACAAAGAGTGAAG-1_1	Cancer_HGSOC1	6438	2034	12.4884	NA	NA	1	1	0.258179	Singlet	Tumor	Monocyte	myeloid	0.370489	-0.103216	0.634251	0.0416171	0.423834	-0.599251	-0.283292	1.23424	-1.46421	0.312875	1.06306	1.17221	-0.328383	-0.103272	0.231096	-0.110905	0.162545	-0.290496	0.272177	-0.643429	1.12802	0.548918	0.69537	1.02755	1.04714	1.69422	0.646733	0.879751	0.212805	0.940587	-0.215367	0.350554	0.0137071	-0.0563804	0.371105	1.01824
AAGACAAAGGGCAGGA-1_1	Cancer_HGSOC1	4972	2143	4.56557	NA	NA	3	3	0.141468	Singlet	Tumor	NK_cell	NK	-0.860143	-0.469628	1.30469	-0.953848	-0.260473	-0.280642	0.243541	-0.250083	0.914347	-0.122013	-0.903047	0.115963	-0.157234	-0.400747	-0.535477	-0.623258	-0.400737	0.312782	0.1787	-0.551183	0.246058	-0.217885	-0.447676	-0.37623	-0.52818	-0.361579	-0.319495	-0.00874535	-0.377512	0.0094758	0.179135	-0.109554	-0.196038	-0.447472	-0.824922	-0.529707
AAGACAAAGTGTTGAA-1_1	Cancer_HGSOC1	1198	686	16.8614	NA	NA	1	1	0.330681	Singlet	Tumor	Macrophage	myeloid	-0.396097	-1.08032	-0.630892	-0.865143	-0.129209	-1.10746	-0.293316	-0.790941	-0.792306	-0.710185	-0.0613903	-0.999762	-1.37639	-0.830579	-0.461014	-0.829274	-0.534768	-1.10745	-0.657072	-1.04695	0.240739	-1.23943	-0.996764	-0.943815	-0.208868	-0.0787373	-1.24866	-1.12109	1.41242	-0.486417	-0.744078	-1.34058	-1.49148	0.095615	0.172831	-0.582516
AAGACAACAAGCGCAA-1_1	Cancer_HGSOC1	5337	1998	10.5303	NA	NA	3	3	0.170645	Singlet	Tumor	NK_cell	NK	-0.185447	-0.432286	0.628844	-0.831583	-0.803086	-0.585177	-0.216171	0.0970012	-0.69269	0.331004	-0.551822	0.29269	-0.348467	-0.359875	-0.317944	-0.584411	-0.99144	-0.180711	-0.304804	-0.570613	-0.0342154	-0.272115	-0.52876	0.502478	-0.668972	0.574347	-0.609314	-0.479912	0.113171	-0.077495	0.0797616	-0.359789	-0.28371	0.439143	-0.368901	-0.0868553
AAGACAACACCCAATA-1_1	Cancer_HGSOC1	30560	4934	22.5393	NA	NA	0	0	0.311229	Singlet	Tumor	Epithelial_cells	epithelial	0.211763	1.44379	-0.491342	1.43242	0.420874	1.58174	0.865816	1.22179	-0.183964	0.976046	1.46042	1.00019	1.0623	0.571036	0.228249	1.75329	1.87977	0.990055	0.628621	0.623121	1.2835	1.8568	0.591953	0.842993	0.837417	-0.092675	0.160191	0.456933	0.0209485	-1.05152	1.49063	1.19452	1.02333	0.224884	2.69732	1.35777
AAGACAACACGTCATA-1_1	Cancer_HGSOC1	32960	5356	6.06189	NA	NA	1	1	0.28824	Singlet	Tumor	Macrophage	myeloid	-1.06771	1.93007	2.26613	1.75691	1.64786	0.994844	1.20411	2.25692	0.814804	1.30874	1.23705	2.15564	1.46116	0.663091	0.243289	0.629163	1.09875	1.3125	1.46464	0.672353	2.21197	1.47013	1.73742	3.36451	3.11185	4.17946	0.358337	1.39456	-1.95373	3.85598	1.55436	1.721	1.46889	1.92714	1.0818	1.07538
AAGACAAGTAGGCAAC-1_1	Cancer_HGSOC1	8751	2750	22.4889	NA	NA	0	0	0.280283	Singlet	Tumor	Epithelial_cells	epithelial	2.27532	-0.0511207	-0.747414	0.656848	1.16957	0.557502	0.529594	0.111246	-0.01291	-0.282434	0.946062	-0.317773	-0.040452	0.300183	0.204425	0.287719	0.453729	-0.471189	0.38198	-0.234755	1.91863	0.121301	-0.221645	-0.100941	-0.139443	-0.638082	-0.617627	-0.703757	-0.305495	-0.00606854	0.243368	0.010243	0.434043	1.33747	0.940268	0.221338
AAGACAAGTGCGACAA-1_1	Cancer_HGSOC1	9805	2790	10.9026	NA	NA	1	1	0.262599	Singlet	Tumor	Monocyte	myeloid	-0.76644	0.384461	0.643762	-0.250427	-0.155976	0.231352	-0.772479	0.541928	-0.340858	0.0766617	1.04812	0.66879	-0.104443	0.0808254	-0.303484	-0.0581454	0.332891	-0.12678	0.0711355	0.174917	0.0927787	0.245924	0.177846	0.419381	0.919652	1.04956	0.508587	0.159052	0.603458	1.32825	-0.0863897	0.230466	0.10432	-0.201758	0.99224	1.91886
AAGACAATCATCACCC-1_1	Cancer_HGSOC1	14597	3878	5.92588	NA	NA	1	1	0.237843	Singlet	Tumor	Macrophage	myeloid	-0.747221	0.72498	1.12589	0.936255	-0.258228	-0.145303	0.653556	0.982687	0.762987	0.306073	0.23139	1.11708	0.96269	0.0124422	-0.265976	0.0517035	0.161962	0.313035	0.543247	-0.191326	1.35531	1.16317	0.376342	0.682826	0.337999	1.75035	1.00017	0.738527	-0.968316	1.84317	0.559697	0.396801	0.819729	0.184026	0.321421	-0.331846
AAGACAATCGCGCCAA-1_1	Cancer_HGSOC1	9828	2865	7.83476	NA	NA	1	1	0.243148	Singlet	Tumor	Monocyte	myeloid	-0.603612	0.171649	0.386952	0.659266	-0.219893	-0.402576	0.421257	0.686064	-0.499045	0.439872	1.13965	1.26228	0.102335	-0.138153	-0.233305	-0.619077	-0.43496	-0.507102	0.079018	0.38368	-1.30824	0.640995	0.952483	0.653819	0.347082	1.15477	-0.300641	0.349416	0.391695	1.19901	0.212367	0.297231	0.0935196	0.0132655	0.288444	0.684071
AAGACTCAGAAAGTCT-1_1	Cancer_HGSOC1	4201	1677	10.6165	NA	NA	3	3	0.190981	Singlet	Tumor	NK_cell	NK	0.214487	-0.707613	0.206788	-0.0190513	0.146415	-0.294955	-0.0276002	0.0455873	-0.433287	-0.40368	0.157765	0.425524	-0.102921	-0.318989	-0.00406554	-0.214843	-0.147596	-0.748184	-0.64013	-0.431365	0.715274	-0.462471	0.200754	0.171114	-0.87474	0.485259	0.56222	0.393054	1.05451	1.09177	-0.291521	-0.409268	-0.476965	-0.302093	0.118943	-1.40824
AAGACTCAGAGGTTAT-1_1	Cancer_HGSOC1	1801	1057	11.9933	NA	NA	4	4	0.216622	Singlet	Tumor	NK_cell	T	-0.785612	-1.18357	-0.145671	-0.578249	-0.729946	-0.798263	-0.136482	-0.350405	-0.597779	-0.515925	-0.43705	-0.686378	-0.916649	-0.615041	-0.37609	-0.388011	-0.485246	-0.86782	-0.724322	-1.03671	0.203078	-0.294613	-0.754543	-1.20975	-0.27147	-0.173861	-0.840047	-0.64312	0.632154	0.359575	-0.296393	-1.03561	-1.21168	-0.774892	-0.482283	-1.12191
AAGACTCAGCAGTACG-1_1	Cancer_HGSOC1	19736	4479	20.7844	NA	NA	0	0	0.312113	Singlet	Tumor	Epithelial_cells	epithelial	2.29819	1.04193	-0.577237	1.32849	1.7875	1.03262	0.768953	1.61194	0.679752	1.15778	1.37417	0.788625	0.853672	0.0771262	0.6948	2.36862	2.64631	0.811037	-0.149102	0.722407	0.782694	1.45678	0.710836	0.924519	-0.0770889	-0.0257733	-0.0611944	0.0140609	0.597309	0.234067	1.45849	0.55202	0.826213	0.222379	2.00963	1.36844
AAGACTCCAAGATGTA-1_1	Cancer_HGSOC1	4542	1405	13.5843	NA	NA	8	8	0.22458	Singlet	Tumor	B_cell	B	-0.220937	-0.920186	-0.655633	-0.750022	-0.88872	-0.964774	-1.35436	-1.26295	-0.0743689	-0.453191	-1.07683	-1.44972	-0.725172	-0.633741	-0.264155	-0.0310763	-0.303675	-0.961381	-0.50981	-0.919421	-1.40998	-0.682551	-0.873907	-1.35533	-0.60161	-0.481858	-1.05819	-1.56085	0.96102	-0.983801	-0.913703	-0.603485	-0.981997	-1.08401	-0.221979	-1.55527
AAGACTCCACGGCTAC-1_1	Cancer_HGSOC1	128284	9696	15.0884	NA	NA	0	0	0.28824	Singlet	Tumor	Epithelial_cells	epithelial	1.92762	2.78639	-0.437462	2.69766	1.81925	2.94458	3.51569	2.58846	1.90894	2.70141	2.09879	1.91391	1.98995	2.42939	0.599831	4.12322	3.20018	2.32732	2.26098	3.15406	3.24036	3.15568	2.72061	2.13359	0.863225	0.932901	1.05296	0.993917	-0.260872	-0.402748	3.04223	2.33334	1.86832	2.59545	2.95416	2.21739
AAGACTCCAGACCTAT-1_1	Cancer_HGSOC1	6113	1845	22.5258	NA	NA	1	1	0.29443	Singlet	Tumor	Monocyte	myeloid	-0.231172	-0.755431	0.112347	-0.357965	-0.03353	-0.6706	-0.0847156	-8.37521e-07	-1.36785	-0.528248	-0.307113	0.571809	-0.808486	-0.29187	-0.407474	-0.254282	-0.675999	-0.624404	0.0716859	-0.51456	0.146225	-0.0010531	0.20805	-0.157698	0.0616657	1.36131	-0.76199	-0.0878381	0.251108	0.741237	-0.442508	-0.471836	-0.979662	-0.362235	0.433558	1.1048
AAGACTCGTGACGCCT-1_1	Cancer_HGSOC1	3664	1572	8.43341	NA	NA	3	3	0.229885	Singlet	Tumor	NK_cell	NK	-0.616703	-0.373078	0.668787	-1.18425	-0.859086	-0.304061	-0.0304548	-0.680679	0.00374552	-0.205462	-0.648782	-0.35524	-0.547384	-0.461473	-0.569615	-0.492363	-0.405958	-0.643726	-0.518368	-0.823671	-0.815357	-0.590121	-0.291854	0.572807	-0.638959	-0.0316919	-0.987889	-0.400726	0.168783	0.44229	-0.206175	-0.361081	-0.845422	-0.267172	-0.452586	-1.39217
AAGACTCGTTGCAAGG-1_1	Cancer_HGSOC1	11977	4141	8.74176	NA	NA	6	6	0.232538	Singlet	Tumor	Smooth_muscle_cells	mesenchymal	-0.721158	0.490254	-1.05413	0.56783	0.704646	1.97635	1.38926	0.533664	1.14202	-0.0881142	1.70125	1.05014	0.0227347	-0.225164	2.09172	0.63171	-0.0819022	-0.0782433	-0.0131798	0.38491	1.22369	0.818078	1.12156	-0.279149	0.0803307	-1.36914	0.0216763	-0.612843	-0.609845	-0.509046	1.31412	0.0704924	0.446644	-0.40812	2.89513	1.49155
AAGACTCTCGAACGGA-1_1	Cancer_HGSOC1	4766	1956	3.52497	NA	NA	3	3	0.198939	Singlet	Tumor	T_cells	NK	-1.01376	-0.720614	1.02704	0.292618	-0.426822	-0.537107	-0.346566	0.16209	-1.7093	-0.84929	-0.781386	0.441365	-0.417723	-0.218624	-0.700764	-0.340732	-0.313011	-0.382955	0.374223	-0.273144	0.421056	-0.435026	-0.410991	0.0831625	0.496522	0.578138	0.221574	0.476312	0.248209	1.2191	-0.176559	-0.476303	0.0275159	-0.291463	-0.931335	-1.46951
AAGATAGAGCTAAACA-1_1	Cancer_HGSOC1	77216	8641	17.5378	NA	NA	0	0	0.284704	Singlet	Tumor	Epithelial_cells	epithelial	0.985011	2.51755	-0.257691	2.37752	1.84616	2.47157	2.80407	2.23781	0.853608	2.5645	2.25244	1.98498	1.67526	1.21261	1.05334	3.89522	3.44072	2.08277	1.4785	2.21872	2.75491	2.80781	2.38394	1.48175	2.24616	0.217125	0.823158	1.1264	-0.502667	1.05762	2.76529	1.55885	1.49904	1.4339	2.981	1.59603
AAGATAGAGGTTCTAC-1_1	Cancer_HGSOC1	5195	2204	17.1511	NA	NA	3	3	0.22458	Singlet	Tumor	NK_cell	NK	-0.372263	-0.193508	0.916517	-0.665028	0.0667778	0.0181846	0.00128368	-0.473631	0.713262	0.408957	-0.889108	-0.476842	-0.0295825	0.700074	-0.462626	-0.00760607	-0.227623	0.0966035	0.553219	-0.27919	-0.323336	-0.687048	0.0926413	-0.0271291	-0.17566	-0.0904593	-1.04485	-0.504754	-0.0485596	0.233068	-0.00676989	0.0332533	-0.0549312	0.431907	-0.35435	-0.633191
AAGATAGCAAAGTATG-1_1	Cancer_HGSOC1	13416	3359	21.2209	NA	NA	0	0	0.284704	Singlet	Tumor	Epithelial_cells	epithelial	0.226958	0.035016	-0.931171	0.628587	0.324265	0.711956	1.0582	0.533359	1.18241	0.442466	0.684957	-0.329044	0.0440315	0.462552	-0.290905	1.49023	0.893535	-0.768202	0.336504	0.44161	0.431235	-0.0751891	0.448829	0.50886	0.164162	0.202969	-0.229424	0.433071	-0.299489	-0.111053	0.332375	-0.0772154	0.250424	0.796527	1.01676	0.862182
AAGATAGCAACGTATC-1_1	Cancer_HGSOC1	8023	2826	22.2111	NA	NA	1	1	0.33687	Singlet	Tumor	Macrophage	myeloid	0.979303	-0.110135	0.584871	0.677846	-1.18377	0.296454	-1.16798	-0.0941964	0.246742	0.230161	1.4354	1.06768	-0.35057	-0.101894	0.0117019	-0.288412	0.16547	-0.047413	0.231674	-0.218002	0.152608	0.260032	-0.0466668	0.922271	0.359792	1.20473	-0.425575	-0.227858	-0.440529	1.75617	0.967187	0.0872765	-0.109518	-0.478926	0.0105977	0.668086
AAGATAGCATGATAGA-1_1	Cancer_HGSOC1	5075	1865	11.1921	NA	NA	3	3	0.176835	Singlet	Tumor	NK_cell	NK	-0.87916	-0.503187	0.429134	-0.298715	-0.572083	-0.633231	0.348695	-0.414402	0.26461	-0.36662	-0.936066	-0.440557	-0.448402	-0.51111	-0.299657	-0.861425	-0.623316	0.30212	-0.577473	-0.45484	-1.04811	-0.484391	-0.31676	0.612145	0.281277	-0.0978105	-0.549209	-0.254718	0.259377	0.445716	-0.403238	-0.404545	-0.383949	-0.745609	-0.647392	0.052946
AAGATAGGTTATGTCG-1_1	Cancer_HGSOC1	6330	1902	6.3981	NA	NA	2	2	0.248453	Singlet	Tumor	T_cells	CD4T	-1.17302	-0.167292	0.32575	-0.896749	-0.292066	-0.286823	-0.512744	0.150996	-1.2913	-0.45835	-0.825692	-0.122734	-0.129623	-0.281774	-0.465348	-0.139443	-0.451316	0.099176	-0.644696	-0.108542	-0.50266	-0.174024	-0.0843885	0.155703	-0.172268	0.74545	-0.137094	-0.145905	-0.0493741	0.513797	0.108958	-0.272111	-0.0775612	-0.261147	-0.793954	-0.58893
AAGATAGTCACTCGAA-1_1	Cancer_HGSOC1	4530	1503	22.9581	NA	NA	1	1	0.308576	Singlet	Tumor	Monocyte	myeloid	-1.0111	-0.938475	0.0633879	-0.412324	-0.704194	-1.01755	-0.913692	-0.432858	-0.830163	-0.775077	0.293264	0.0995503	-0.663329	-0.10631	-0.220662	0.00569668	-0.14152	-0.761282	-0.015001	-0.643445	-1.46193	-0.0494459	-0.0621089	0.205088	0.927462	1.02388	-1.30436	-0.688389	1.49194	0.938876	-0.117371	-0.334373	-0.655666	-0.182998	0.147422	1.82898
AAGATAGTCTAACGCA-1_1	Cancer_HGSOC1	3387	1652	11.2194	NA	NA	5	5	0.216622	Singlet	Tumor	T_cells	CD8T	-0.739848	-0.969821	0.80553	-0.779863	0.23565	-0.0775341	-1.46111	-1.16555	0.139822	-0.796036	-0.779926	-0.34755	-0.992428	-0.608835	-0.241589	-0.181048	-0.712403	-1.04882	-0.207531	-0.825056	0.704217	-0.709565	-0.72688	-0.225835	-0.378089	0.228836	-0.36174	0.260627	0.297312	-0.253941	-0.035123	-0.599303	-0.956143	-0.728761	0.122631	-0.424743
AAGATAGTCTGGACCG-1_1	Cancer_HGSOC1	6357	2232	10.3351	NA	NA	3	3	0.236958	Singlet	Tumor	NK_cell	NK	-0.688258	0.242303	0.620885	-0.783362	-0.152639	0.376238	-0.108409	0.382353	0.0861079	0.209949	-0.341713	-0.305415	-0.4398	-0.376503	-0.616211	-0.686027	-0.434276	0.0316254	0.000414375	-0.202885	-0.0739848	-0.11614	-0.367479	-0.331692	-0.0211476	-0.196331	-0.929733	-0.598225	-0.230733	0.637905	0.123521	-0.477228	-0.0885289	-0.480579	-0.153218	-0.682827
AAGCATCAGCATTTCG-1_1	Cancer_HGSOC1	6417	2394	4.48808	NA	NA	3	3	0.151194	Singlet	Tumor	NK_cell	NK	-0.73269	-0.36511	1.15544	-0.189365	-0.373675	-0.217303	0.377428	0.683695	1.26794	0.0368745	-0.891366	0.606269	-0.254511	-0.380272	-0.452253	0.467657	0.580351	-0.059124	0.102785	-0.278016	0.575253	0.0542392	-0.0347733	0.974893	-0.391751	0.397231	1.08121	0.715035	0.663871	0.601165	0.265732	0.524129	0.120829	-0.359656	-0.360158	-0.51852
AAGCATCAGTTGAATG-1_1	Cancer_HGSOC1	23887	4119	10.7506	NA	NA	1	1	0.328912	Singlet	Tumor	Macrophage	myeloid	-1.56627	1.39004	1.49579	0.574304	1.05836	0.935084	-0.582704	1.34351	-0.263409	1.0348	2.23792	2.19552	0.50942	0.516507	0.267062	0.466086	0.511465	1.54414	0.281795	0.261354	-0.191968	0.716619	1.2145	1.3777	2.23402	1.31352	0.805178	0.791925	-1.35476	1.37164	1.1014	0.738985	0.846582	0.0704087	1.0432	-0.0519231
AAGCATCCAAGCGAGT-1_1	Cancer_HGSOC1	5682	2038	8.32453	NA	NA	3	3	0.206897	Singlet	Tumor	NK_cell	NK	-0.191199	0.306599	0.748498	-0.465867	-0.457646	-0.568149	-0.452349	-0.168635	0.77679	-0.587126	-0.887033	-0.476188	-0.507671	-0.232856	-0.477558	-0.537067	-0.25983	-0.256932	-0.186865	-0.314947	-1.0257	-0.701408	0.21346	1.53842	-0.227195	-0.116129	-0.662869	-0.440841	0.135816	0.061077	-0.469088	0.216561	0.0916612	0.341533	-0.729193	-1.1621
AAGCATCCATCTCATT-1_1	Cancer_HGSOC1	25589	5540	18.3555	NA	NA	0	0	0.327144	Singlet	Tumor	Epithelial_cells	epithelial	1.56671	1.16075	1.0542	2.12481	0.523066	1.54956	2.31385	2.09546	1.31448	1.15582	1.04306	1.93098	0.137996	0.466817	0.59181	3.5719	2.44787	0.985935	0.915184	1.00621	0.567237	1.75653	2.01906	1.17784	1.60521	1.5929	0.906876	1.28284	-0.153112	1.48797	1.81456	1.13789	0.846571	0.414807	1.96112	-0.770919
AAGCATCTCACCTTGC-1_1	Cancer_HGSOC1	96194	9371	24.6117	NA	NA	0	0	0.302387	Singlet	Tumor	Epithelial_cells	epithelial	0.445998	2.46796	0.174743	2.55292	0.773759	2.8512	1.95372	1.96419	1.26064	2.58029	1.03589	1.57443	2.0675	1.36471	0.36932	4.25444	3.66787	2.13596	1.6294	2.28751	2.47968	2.70952	2.04517	1.93837	0.946458	0.965103	1.76233	1.56215	-1.12361	-0.316136	2.69571	1.99336	1.6475	2.1864	2.68339	0.857928
AAGCATCTCCTCAGGG-1_1	Cancer_HGSOC1	24988	4406	13.2824	NA	NA	1	1	0.333333	Singlet	Tumor	Macrophage	myeloid	-1.49617	1.13269	1.51484	1.19939	1.37235	0.979149	1.24483	1.76458	-0.0154608	1.1704	1.24084	2.24582	1.80454	1.58546	0.361142	0.172267	0.0699393	0.67943	1.12238	0.733251	2.5534	0.735641	1.48229	2.57826	2.45849	2.8223	0.580574	1.4046	-2.25031	3.97107	0.841945	1.77944	1.44997	1.79433	0.431666	1.84507
AAGCCATAGCGTACAG-1_1	Cancer_HGSOC1	4980	1576	10.6627	NA	NA	2	2	0.221927	Singlet	Tumor	T_cells	CD4T	-0.373862	-0.564798	0.255358	-0.534999	-1.04525	-0.963734	-1.10148	-0.390164	-0.614621	-0.575338	-0.812996	-0.963115	-0.514142	-0.543797	-0.500031	-0.455553	-0.422373	-0.486771	-0.534907	-0.574033	-0.75246	-0.812446	-0.453566	-0.719928	-0.118073	0.00814222	-0.8421	-0.802842	0.492118	-0.322426	-0.785744	-0.544847	-0.560021	0.4001	-0.954146	-0.114926
AAGCCATCATATGAAG-1_1	Cancer_HGSOC1	1179	622	1.35708	NA	NA	0	0	0.259947	Singlet	Tumor	Pre-B_cell_CD34-	epithelial	0.547352	-0.426985	-1.43503	-1.03173	-0.0923702	-1.30019	-0.241701	-0.80981	0.374207	-0.120747	0.0352285	-1.33411	-1.07814	-0.440358	-0.684623	-0.238421	-0.384113	-0.664295	-0.613901	-0.23446	-0.544739	-1.11724	-1.13204	-1.58118	-1.51814	-1.02025	-1.406	-1.59368	1.09527	-1.13171	-0.96722	-1.05896	-0.871006	-0.323276	-0.641534	-1.16027
AAGCCATGTGCCGTTG-1_1	Cancer_HGSOC1	500	307	1.4	NA	NA	0	0	0.230769	Singlet	Tumor	NK_cell	epithelial	1.71829	-1.25638	-1.29678	-0.671192	-0.230736	-1.25091	-0.749076	-1.31045	-0.239461	-0.775529	-0.0839842	-1.80505	-1.2631	-1.06683	-0.642525	-0.839304	-0.881119	-0.998421	-1.19414	-0.782083	-0.85172	-1.22042	-1.27678	-1.55556	-1.29803	-1.2649	-1.71872	-1.90392	1.36267	-1.02205	-1.42748	-1.15743	-1.28348	-0.8578	-0.238568	-0.563041
AAGCCATGTGTGACCC-1_1	Cancer_HGSOC1	758	416	17.4142	NA	NA	4	4	0.225464	Singlet	Tumor	Pre-B_cell_CD34-	T	-0.138604	-1.32802	-1.60457	-1.29214	-0.476795	-1.18298	-0.183234	-1.2406	0.397313	-0.520992	-0.207356	-1.21873	-1.23552	-0.969463	-0.318052	-0.724299	-0.894733	-1.21164	-1.02552	-1.28289	-0.912086	-1.08464	-1.1027	-1.04689	-1.14651	-0.435952	-1.37652	-1.73792	1.02344	-0.724103	-1.03369	-1.2934	-1.60868	-0.870907	-0.217462	0.541408
AAGCCATTCGACCCAG-1_1	Cancer_HGSOC1	15855	3962	13.9767	NA	NA	1	1	0.263484	Singlet	Tumor	Macrophage	myeloid	2.6598	1.43153	2.08547	0.988364	1.86055	0.972516	1.57683	1.57119	2.74185	1.62445	1.30116	1.86645	0.390255	-0.0436122	0.221505	0.694058	0.820218	1.16538	0.386894	0.949791	1.77667	1.90112	1.87218	1.6783	2.33909	3.47965	1.6346	1.78946	-0.721298	3.43382	1.26415	1.54533	0.49696	-0.560465	0.42352	1.36764
AAGCCATTCGCGCTGA-1_1	Cancer_HGSOC1	9411	2582	17.182	NA	NA	1	1	0.267905	Singlet	Tumor	Macrophage	myeloid	0.26606	-0.428518	0.643172	-0.201055	0.162387	0.516434	0.635219	0.872094	-2.29541	0.28548	1.14883	1.90394	-0.484694	-0.119202	-0.114367	0.39943	0.494582	-0.0237856	-0.348075	-0.56504	0.715287	0.233439	1.19716	1.50934	2.2775	2.1096	0.0297195	0.220956	0.290936	2.7169	0.53582	0.192967	-0.439757	-0.395702	-0.22107	0.84848
AAGCGAGAGGGAGGGT-1_1	Cancer_HGSOC1	3392	1294	0.678066	NA	NA	7	7	0.252874	Singlet	Tumor	NK_cell	CD8T	-0.111066	-0.162957	-0.282149	-0.803802	-0.63633	-0.660047	-1.00577	-1.03897	0.665914	0.161636	-0.573541	-0.763657	-0.0696085	1.00308	-0.289457	-0.952981	-0.411849	0.365961	0.0637522	-0.0716566	-0.662366	-0.892868	-0.799912	-0.980318	-1.65207	-0.896282	-1.02338	-0.995465	0.157259	-1.40974	-0.517093	-0.506313	0.738559	0.301116	-0.613008	-0.578497
AAGCGAGCAAAGCGTG-1_1	Cancer_HGSOC1	4104	1739	5.82359	NA	NA	2	2	0.208665	Singlet	Tumor	NK_cell	CD4T	-0.549243	-0.848163	-0.757728	-1.4174	-0.324067	-0.677029	-0.527264	-0.608008	0.878735	-0.129255	-0.946743	-1.01973	-0.444519	-0.344198	-0.815168	-0.386193	-0.611565	-0.518731	-0.14616	-0.0941567	-0.228736	-0.210513	-0.310563	-0.576544	-0.611891	-0.862323	-0.62464	-1.17021	-0.037057	-1.22494	-0.26032	-0.533569	-0.435114	-0.925474	-0.134439	-0.0676066
AAGCGAGGTCCGAAGA-1_1	Cancer_HGSOC1	14648	3547	13.7835	NA	NA	1	1	0.25641	Singlet	Tumor	Macrophage	myeloid	0.38056	0.965019	1.32692	0.61015	0.38493	0.323155	0.210568	1.55621	-0.518673	-0.12771	1.5468	1.6503	0.357954	0.307092	0.122289	0.322656	0.807828	-0.00875241	0.217316	0.210309	0.76243	0.805801	0.647848	1.81168	2.27411	2.20367	0.809268	1.1709	-0.544846	2.04954	0.990577	0.598372	0.360206	0.43676	0.299301	0.942323
AAGCGAGTCCACAGGC-1_1	Cancer_HGSOC1	5326	1998	11.0777	NA	NA	3	3	0.250221	Singlet	Tumor	T_cells	NK	0.644503	-0.299331	0.765146	-0.556396	-0.673917	-1.04146	0.944418	-0.451855	-0.79268	-0.471577	-0.948238	0.0802313	-0.469269	-0.329505	-0.335375	-0.327029	-0.865856	-0.611913	-0.216574	-0.71362	0.0967848	-0.373312	-0.0204562	1.42294	0.872626	-0.605192	-0.619721	-0.151355	-0.267227	-0.0882823	-0.0312037	0.0452573	-0.400453	0.00960453	-0.801827	-0.509915
AAGCGAGTCGTGCTCT-1_1	Cancer_HGSOC1	1478	601	1.55616	NA	NA	0	0	0.300619	Singlet	Tumor	Epithelial_cells	epithelial	0.600296	-0.367314	-1.02514	-1.01949	-0.200898	-0.765562	0.113071	-0.708457	-0.200252	0.411189	0.505341	-0.487939	-1.00931	-0.89552	-0.171067	-0.47966	-0.40077	-0.866637	-0.973829	-0.194871	-0.991107	-0.95887	-0.865297	-1.51476	-0.743875	-0.535604	-1.17971	-1.53324	1.33205	-0.202158	-1.39123	-0.998424	-1.25264	-0.473508	-0.608605	-0.181755
AAGCGTTAGGGTTAGC-1_1	Cancer_HGSOC1	7561	2770	7.59159	NA	NA	3	3	0.233422	Singlet	Tumor	NK_cell	NK	0.849354	0.397046	0.760928	0.760592	-0.101925	0.0982866	1.15248	0.630466	-0.137891	-0.00745942	0.755719	0.326083	-0.425004	0.125062	0.165644	0.570733	0.484431	0.663446	0.0986619	-0.0486967	-0.0767578	0.635977	0.592337	0.840796	0.113767	0.466526	-0.454866	-0.202174	1.18783	0.0029843	0.0890002	0.268639	0.43621	-0.178445	0.543241	0.345543
AAGCGTTAGTGAACAT-1_1	Cancer_HGSOC1	9813	2758	19.8818	NA	NA	1	1	0.330681	Singlet	Tumor	Monocyte	myeloid	-0.554562	-0.329439	0.847734	0.0410229	-0.301467	0.313042	1.13126	0.709486	0.524861	0.813693	1.04507	1.16114	-0.572775	-0.0707595	-0.0880793	0.212013	0.618097	-0.329846	0.252429	-0.100436	0.654303	-0.0461981	0.821828	1.3546	2.56719	1.1329	0.559109	0.841637	0.32319	2.41839	0.247189	0.186904	-0.390917	-0.467385	0.35291	0.256263
AAGCGTTAGTGTCATC-1_1	Cancer_HGSOC1	28325	4932	17.0274	NA	NA	0	0	0.318302	Singlet	Tumor	Epithelial_cells	epithelial	-0.897057	1.25768	-1.42446	1.50209	0.252132	1.61603	0.679396	1.49887	-0.209617	1.64487	0.446853	0.192796	1.4319	1.18726	0.149034	1.86129	2.38481	1.01446	1.07951	1.20839	0.264249	1.13573	0.431373	-0.399579	-0.210865	-0.643098	-0.328966	-0.271555	-0.543726	-1.08043	1.17371	1.09195	1.33795	1.54358	1.06357	0.127321
AAGCGTTAGTTGTCGT-1_1	Cancer_HGSOC1	1643	837	19.1722	NA	NA	4	4	0.189213	Singlet	Tumor	T_cells	T	-0.539031	-1.16829	-0.651495	-1.40457	-0.713694	-1.19088	-0.410273	-1.19547	-0.366211	-1.13241	-0.823873	-1.38255	-0.891069	-0.785129	-0.368867	-0.731161	-0.746649	-1.2966	-1.00646	-1.10379	-1.11687	-0.860764	-1.03424	-1.02687	-1.27696	-0.470843	-1.38284	-1.3198	0.492612	-0.405272	-1.11251	-1.22957	-1.3335	-0.931451	-0.64031	-1.01014
AAGCGTTTCATTTACC-1_1	Cancer_HGSOC1	3445	1413	6.61829	NA	NA	3	3	0.252874	Singlet	Tumor	NK_cell	NK	1.00417	-0.964061	-0.357919	-0.906091	-0.526547	-0.514751	0.352552	-0.335365	-0.861122	-0.654553	-0.348443	-0.0990474	-0.815147	-0.410536	-0.141594	-0.367776	-0.196672	-0.660615	-0.450065	-0.361953	-0.728154	-0.705899	-0.0865481	0.65222	-0.631426	0.447276	-0.932777	-0.871912	0.41054	0.209489	-0.292113	-0.671265	-0.351596	-0.858574	-0.381526	-1.15157
AAGCGTTTCCATCCGT-1_1	Cancer_HGSOC1	18728	4517	13.6213	NA	NA	1	1	0.300619	Singlet	Tumor	Macrophage	myeloid	-0.609331	0.847821	0.861314	0.758359	0.814487	0.334271	0.584382	1.73933	0.192449	0.257363	1.47962	2.11405	1.38944	3.12308	0.0367893	0.0760385	0.670582	0.640213	2.88143	0.543542	0.933086	1.25939	1.07821	0.507494	1.83455	2.4669	0.701526	0.909192	-2.00367	1.94634	2.54756	0.976059	0.905129	0.0609656	0.260932	1.00107
AAGCGTTTCCGGGACT-1_1	Cancer_HGSOC1	5272	1804	23.8619	NA	NA	1	1	0.312113	Singlet	Tumor	Monocyte	myeloid	-0.832998	-0.47501	0.155722	-0.882173	0.49833	-0.352944	0.562246	0.320994	0.375121	-0.502808	0.610341	0.367165	-0.631675	-0.285562	-0.392739	-0.553196	-0.467956	-0.626539	-0.0713688	-0.649643	-0.688083	-0.0944888	-0.169171	1.30094	1.46129	0.830048	0.0849453	0.192218	0.277965	0.764753	-0.125027	-0.58429	-0.624806	-0.701258	-0.198587	1.72617
AAGGAATCAACACGTT-1_1	Cancer_HGSOC1	6457	2303	7.5422	NA	NA	5	5	0.132626	Singlet	Tumor	NK_cell	CD8T	-0.380758	0.212434	1.39793	-0.244543	-0.291532	-0.0200078	0.0689758	-0.119433	-0.34153	0.10802	-0.665393	-0.313863	-0.566448	-0.12579	-0.645038	-0.517706	0.221224	-0.418114	0.120731	-0.682189	0.604779	-0.557255	-0.541159	0.515209	0.11881	-0.210601	-0.544993	-0.470109	-0.189742	0.777494	0.339959	0.170313	0.106824	-0.053236	-0.0412958	0.681155
AAGGAATCAGGCGAAT-1_1	Cancer_HGSOC1	6172	2448	11.3577	NA	NA	3	3	0.217507	Singlet	Tumor	NK_cell	NK	-0.526697	-0.181564	0.492372	-0.830719	-0.178769	-0.233404	0.21138	0.353434	0.841192	0.297656	-0.459766	0.0953663	-0.343517	-0.494273	-0.729536	-0.564245	-0.410217	-0.421331	-0.152986	-0.603662	-0.0466964	0.383424	0.0694455	1.12231	-0.292145	-0.388259	-0.415951	0.0951391	-0.374556	-0.484158	-0.129848	0.413441	-0.0680137	-0.282891	-0.336716	-0.0448756
AAGGAATCATGCGGTC-1_1	Cancer_HGSOC1	5662	2210	8.8308	NA	NA	3	3	0.220159	Singlet	Tumor	NK_cell	NK	-1.32086	-0.127178	0.713382	-0.25016	-1.34949	-0.218916	0.205678	-0.400322	-0.53747	0.436336	-0.673858	0.268468	-0.204517	-0.0477095	-0.402075	-0.482384	-0.496728	0.246814	0.00455643	-0.478164	0.0387376	0.330697	0.272941	0.196169	0.0785224	-0.348058	-0.794453	-0.122103	-0.219754	-1.3069	-0.0732183	0.199175	0.236212	-0.45582	-0.430571	-0.86194
AAGGAATGTATCAAGA-1_1	Cancer_HGSOC1	3605	1456	12.2607	NA	NA	2	2	0.198939	Singlet	Tumor	T_cells	CD4T	-0.992495	-0.34725	-0.0319645	-0.17118	-0.363683	0.078147	-0.829014	-0.375343	0.362419	-0.782147	-0.783945	-0.78055	-0.832435	-0.502389	-0.321353	-0.427761	-0.99867	-0.395845	-0.501981	-0.31288	-0.751298	-1.03438	-0.852224	0.561015	-0.287214	-0.510075	-0.844367	-1.22193	0.12819	0.73429	-0.216585	-0.933046	-0.371676	-0.312306	-0.401949	-0.230672
AAGGTAAAGGGAGGCA-1_1	Cancer_HGSOC1	4134	1768	12.5302	NA	NA	5	5	0.236074	Singlet	Tumor	T_cells	CD8T	-0.371638	-1.10417	0.945824	-0.68127	-0.418257	-0.13108	0.234535	0.089829	-0.657563	-0.742331	-0.48549	-0.226545	-0.634569	-0.325454	-0.189355	-0.0648809	-0.0682981	-1.11472	-0.0814045	-0.973663	-0.0634005	-0.630633	0.0836168	0.947199	0.0532816	-0.0451269	-1.2552	-0.23739	1.13541	0.298751	0.299906	-0.685334	-0.359663	-0.362814	0.072873	-0.644368
AAGGTAACAACATCGT-1_1	Cancer_HGSOC1	21337	4959	11.0887	NA	NA	6	6	0.259063	Singlet	Tumor	Tissue_stem_cells	mesenchymal	1.38547	0.856787	-1.19412	1.02216	1.83892	2.08902	-0.0462356	1.4838	-0.0798432	0.908504	1.99301	0.257656	0.885025	0.382933	3.18872	0.4246	0.456692	0.36977	0.26569	0.934522	0.47665	0.967796	1.59745	0.637033	0.371409	-1.02879	-0.354758	-0.614745	-1.15316	0.387542	1.21842	0.680141	0.910922	1.39794	2.538	1.53777
AAGGTAACAGACACAG-1_1	Cancer_HGSOC1	3536	1498	6.58937	NA	NA	3	3	0.210433	Singlet	Tumor	NK_cell	NK	-0.507209	-1.10021	0.215475	-0.528341	-0.827436	-0.381849	-0.315683	-0.442123	-1.35211	-0.675502	-0.769348	-0.500873	-0.543929	-0.511828	-0.254952	-0.693393	-0.99354	-1.00633	-0.28434	-0.775029	-0.198933	-0.709283	-0.0495363	-0.452928	-0.128905	0.266738	-0.360042	-0.274249	0.450308	0.625308	-0.698878	-0.923199	-0.684925	-0.456533	-0.478845	-0.637384
AAGGTAAGTAGTCGTT-1_1	Cancer_HGSOC1	17210	4667	14.201	NA	NA	1	1	0.343059	Singlet	Tumor	Macrophage	myeloid	2.57952	0.93905	0.876763	1.52036	-0.294927	1.15961	0.62027	1.88501	-1.09894	1.37636	0.958441	1.58564	1.33438	1.72746	0.186925	0.595438	0.663568	0.456802	1.83544	2.12973	-0.233051	1.9324	2.29154	1.93926	1.39648	1.43652	-0.146707	0.532491	-0.110322	1.13854	2.31697	1.36928	0.800367	-0.518527	0.734274	-1.41535
AAGTACCAGCACTTTG-1_1	Cancer_HGSOC1	4998	2112	9.10364	NA	NA	3	3	0.157383	Singlet	Tumor	NK_cell	NK	0.0234805	-0.0321052	0.763499	0.223928	-0.654207	0.0763007	1.63545	-0.0579728	0.0211048	-0.297585	-0.781103	-0.240699	-0.224537	-0.208337	-0.445611	-0.506173	0.180459	0.347717	-0.419805	-0.412084	-0.0574755	0.0322737	-0.407066	0.559239	0.0495994	-0.219522	-0.938659	-0.618523	0.632791	1.05972	-0.130962	-0.327664	0.069552	0.410937	-0.486243	-0.318993
AAGTACCAGCGACTAG-1_1	Cancer_HGSOC1	14176	2704	9.50903	NA	NA	8	8	0.225464	Singlet	Tumor	B_cell	B	-0.431697	-0.279797	0.0774161	0.493316	-0.204051	-0.908179	0.327439	0.158387	-0.488741	-0.116116	-0.526469	-0.536319	-0.0439127	-0.270659	-0.450832	-0.378025	-0.409338	-0.290833	-0.092654	-0.510538	-0.520752	0.733668	0.572511	0.666766	-0.193772	-0.344451	-0.662387	-0.376568	0.575095	0.661943	-0.313337	0.302172	-0.206811	0.28412	0.086861	-0.447636
AAGTACCAGGACAGTC-1_1	Cancer_HGSOC1	45798	2810	2.356	NA	NA	8	8	0.221927	Singlet	Tumor	B_cell	B	-1.10453	0.349876	0.140298	0.286209	-1.12432	-0.292219	-0.785767	0.476941	0.797311	-0.240632	0.396266	0.517704	0.236077	-0.166495	-0.254133	-0.306003	0.0805246	0.250629	0.0807632	0.423549	-0.322872	0.477521	0.656799	0.0457831	0.0586265	0.134397	-0.26607	0.425734	-0.138839	0.0785387	0.166577	0.477697	0.013663	-0.136274	-0.415359	-0.61392
AAGTACCAGGAGTCTG-1_1	Cancer_HGSOC1	2880	1129	8.33333	NA	NA	2	2	0.223696	Singlet	Tumor	T_cells	CD4T	-0.15282	-0.955098	0.183145	-1.16023	-0.546531	-0.635288	-1.22865	-0.392114	-0.36701	-0.92984	-0.485527	-0.798838	-0.793193	-0.458957	-0.379739	-0.0630212	-0.648269	-1.02344	-0.541014	-0.9103	-1.28467	-0.45215	-0.332888	-0.770902	-0.455222	-0.0876139	-0.842865	-0.969524	0.77068	0.0523341	-0.911333	-0.959174	-0.798506	-0.690885	-0.943517	-1.14743
AAGTACCCAATAGTCC-1_1	Cancer_HGSOC1	3635	1336	14.6355	NA	NA	12	12	0.20336	Singlet	Tumor	B_cell	B	0.829523	-0.919962	0.0153849	-0.620733	-0.519726	-0.458297	-0.11477	-1.18546	-0.46493	-0.906293	-1.1412	-1.07294	-0.893694	-0.454403	-0.532048	-0.241217	-0.741134	-0.964612	-0.690376	-1.43357	0.0336868	-0.59134	-0.752791	-0.657949	0.212401	-0.89116	-1.35253	-1.2241	0.60579	0.285836	-0.638749	-0.972976	-0.620975	-0.20271	-0.339765	-1.53298
AAGTACCCATAGGCGA-1_1	Cancer_HGSOC1	4841	1775	22.5573	NA	NA	3	3	0.236074	Singlet	Tumor	NK_cell	NK	-1.50708	-0.585937	0.292523	-0.467831	-0.543303	-0.154732	0.61623	-0.823353	-0.426163	-0.55038	-1.0393	-0.35542	-0.429489	-0.440885	-0.714946	-0.403746	-0.597087	-0.656184	0.0462581	-0.635443	0.863728	-0.432717	-0.755718	-0.429882	-0.34068	-0.78428	-0.908644	-0.736607	-0.0864895	0.230133	0.194834	-0.668658	-0.596168	-0.025195	-0.531787	-0.759766
AAGTACCCATTCGGGC-1_1	Cancer_HGSOC1	26368	5170	15.2154	NA	NA	0	0	0.302387	Singlet	Tumor	Epithelial_cells	epithelial	1.12865	1.20938	-0.549253	0.631624	1.22366	1.39792	1.55062	0.795223	0.0555706	0.823439	0.0197972	-0.5523	0.895081	0.681696	-0.511697	1.64685	1.53034	0.786065	0.879794	0.735934	1.94617	0.824999	0.614421	0.547272	-0.622661	-1.32165	-0.139355	-0.137832	-0.463731	-0.968603	0.794339	0.254957	1.08906	2.33167	1.52555	0.512011
AAGTACCTCACGTCCT-1_1	Cancer_HGSOC1	3534	1559	9.47934	NA	NA	2	2	0.201592	Singlet	Tumor	T_cells	CD4T	-0.434762	-0.715163	0.355269	-0.550433	0.0298877	-0.153067	0.207999	-0.273503	-0.611385	-0.775073	-0.781687	-0.0887812	-0.868306	-0.203598	-0.409953	-0.20441	-0.21259	-0.198942	-0.284311	-0.326657	1.02344	-0.569403	0.10799	0.0516108	-0.411549	0.722913	-0.400812	-0.330076	0.711677	0.571524	0.0767646	-0.526652	-0.92542	-0.845493	-0.76512	-0.847071
AAGTACCTCTTAAGGC-1_1	Cancer_HGSOC1	7506	2296	22.3155	NA	NA	1	1	0.311229	Singlet	Tumor	Macrophage	myeloid	-0.0957765	-0.201691	0.254678	-0.0671998	0.268098	-0.201751	-0.579381	-0.21865	0.877828	0.159611	0.564733	0.618533	-0.584367	0.208336	-0.168031	-0.65814	-0.560355	-0.0910453	0.174497	-0.500808	0.973709	0.311337	0.137426	0.710084	1.05476	1.48627	-0.5655	-0.344705	-0.717129	0.902583	0.225333	0.29384	-0.334697	-0.244532	-0.0152707	-0.253243
AAGTCGTCAAACTAGA-1_1	Cancer_HGSOC1	22425	5153	12.3077	NA	NA	0	0	0.309461	Singlet	Tumor	Epithelial_cells	epithelial	-0.596321	1.26199	0.262054	1.19207	0.64807	1.6211	2.00619	1.66443	0.305545	1.98122	0.979924	0.699497	0.705911	0.745723	0.675396	1.63602	1.59308	0.746767	0.884245	0.927772	1.37358	1.31097	0.831755	1.09141	1.31421	1.297	2.19372	1.67146	-0.468197	-0.00419634	1.55286	1.63253	1.21573	2.03301	1.20028	2.21986
AAGTCGTCAAAGTATG-1_1	Cancer_HGSOC1	6055	2404	4.2114	NA	NA	5	5	0.259947	Singlet	Tumor	T_cells	CD8T	-0.399815	0.0714761	1.44484	-0.493334	-0.990158	-0.497217	-1.38866	0.52081	0.901426	0.270145	-0.454526	0.82497	0.00359516	-0.209378	-0.484153	0.385164	0.148651	-0.399933	-0.142589	-0.2607	0.285265	0.264243	0.351246	0.890872	1.09242	0.0387873	0.711084	0.979224	-0.192346	-0.206861	-0.317509	0.384758	-0.0411069	-0.475182	-0.704805	-0.532205
AAGTCGTCAAATTGGA-1_1	Cancer_HGSOC1	5029	1917	10.4991	NA	NA	3	3	0.191866	Singlet	Tumor	NK_cell	NK	-0.706752	-0.401329	0.382916	0.043836	-0.500346	-0.340929	0.0795573	-0.418971	1.04302	-0.288643	-1.0164	-0.373547	-0.624405	-0.458349	-0.184176	-0.342307	-1.04718	0.158066	-0.35966	-0.697319	-0.442642	-0.4113	-0.691615	-0.0958186	-0.381073	-0.742316	-0.478328	-0.253209	0.208048	0.314176	-0.157166	-0.417548	-0.0893787	-0.0813964	-0.46447	0.605697
AAGTCGTGTGAACTAA-1_1	Cancer_HGSOC1	167598	9814	17.0151	NA	NA	0	0	0.307692	Singlet	Tumor	Epithelial_cells	epithelial	2.20104	2.65623	1.03303	2.59806	1.55387	3.25944	3.79003	2.87891	2.08276	2.3285	2.24704	3.2568	2.14499	1.15049	1.26191	4.74875	4.07451	2.3099	1.49199	2.70827	2.78928	3.04465	2.43587	2.96	2.87967	2.44709	3.53365	3.35059	0.25869	1.90036	2.407	2.2586	1.75537	2.53985	3.07646	2.30119
AAGTCGTTCAGAATAG-1_1	Cancer_HGSOC1	5555	1767	15.8956	NA	NA	1	1	0.296198	Singlet	Tumor	Macrophage	myeloid	-0.124669	-0.590386	-0.169406	-0.120458	0.171821	-0.748767	-0.12229	0.0113873	-1.39316	-0.145599	0.561434	0.150497	-0.762569	-0.611823	0.0884544	0.382046	0.00827861	-0.459103	-0.494756	-0.695443	-0.726402	-0.304241	0.252517	-0.297514	-0.105775	1.0915	-0.878911	-0.757444	0.0482554	2.14558	-0.234112	-0.680549	-1.03475	-0.778526	-0.559339	0.769355
AAGTCGTTCGGTGAAG-1_1	Cancer_HGSOC1	4289	1712	7.62415	NA	NA	2	2	0.234306	Singlet	Tumor	T_cells	CD4T	-1.22673	-0.121448	0.30376	-0.244494	-0.558287	-0.0214662	-0.378442	-0.991121	-1.17535	-0.637563	-1.00808	-0.573546	-0.572163	-0.0890508	-0.409385	-0.160752	-0.466992	-0.580577	-0.249414	-1.08957	-1.03166	-0.563837	-0.512813	-0.470151	-0.356092	0.223867	-0.319775	-0.176116	0.731377	0.666493	-0.439179	-0.584295	-0.143074	-0.569011	-0.713506	-1.08097
AAGTGAAAGGCTAAAT-1_1	Cancer_HGSOC1	5695	1932	7.97191	NA	NA	2	2	0.236074	Singlet	Tumor	T_cells	CD4T	1.86728	-0.168459	0.791178	-0.386871	-0.0145763	-0.0273426	-1.34243	-0.124237	-0.955178	-0.436965	-0.547706	-0.502713	-0.467276	-0.229806	-0.139836	-0.419092	-0.447943	-0.466278	0.00136491	-0.24172	0.291689	-0.369697	0.0930023	0.583044	-0.0487484	-0.00524433	-0.570221	-0.125075	-0.243413	0.70038	-0.157989	-0.602545	-0.157672	-0.422193	-0.153617	-0.499319
AAGTGAAAGTATCCTG-1_1	Cancer_HGSOC1	7241	2689	4.46071	NA	NA	3	3	0.179487	Singlet	Tumor	NK_cell	NK	-1.51806	0.305104	1.39815	0.101949	-0.365598	-0.360553	0.311557	0.270288	-0.402407	0.433291	-0.301935	0.830669	-0.0937971	0.248607	-0.497513	0.135389	-0.0963783	0.625446	0.592336	-0.0341689	-0.298046	0.166033	0.815614	1.15117	-0.0611367	-0.158745	-0.372431	0.208684	-0.369113	0.0603396	0.0928664	0.414128	0.415933	-0.473027	-0.0856232	1.04943
AAGTGAACAGAGGTAC-1_1	Cancer_HGSOC1	1109	537	1.71326	NA	NA	1	1	0.293546	Singlet	Tumor	Monocyte	myeloid	0.434608	-1.20203	-1.16111	-1.03032	-0.189207	-0.614899	-0.957658	-0.821489	-0.0829624	-0.74635	-0.305606	-1.08948	-1.13524	-0.959173	-0.345372	-0.806378	-1.00609	-0.578963	-1.26286	-0.604724	-0.513603	-0.858273	-1.34748	-1.20493	-0.80089	-0.0993713	-1.0565	-1.34166	0.846508	-0.459707	-1.25902	-1.17242	-1.00181	-1.0361	-0.169249	-0.440495
AAGTGAAGTCTAACTG-1_1	Cancer_HGSOC1	5319	1716	11.6939	NA	NA	2	2	0.202476	Singlet	Tumor	T_cells	CD4T	-0.725715	-0.594425	0.352767	0.0459761	0.353478	-0.535557	0.0845214	-0.324663	-0.209042	-0.766181	0.0360899	0.310813	-0.431404	-0.0373475	-0.645444	-0.495422	-0.250907	-0.490874	-0.202073	-0.617034	-1.57531	-0.312557	-0.378064	-0.485057	-0.555701	-0.550427	-1.08076	-0.9027	0.0351679	-0.0431156	-0.530686	-0.93402	0.256594	0.0170042	-0.754372	-0.654983
AAGTGAAGTCTTCATT-1_1	Cancer_HGSOC1	2017	978	2.57809	NA	NA	0	0	0.275862	Singlet	Tumor	Epithelial_cells	epithelial	0.475693	0.0528475	-0.304457	-0.507704	0.156112	-0.569049	0.261451	-0.778457	1.00277	-0.643896	0.0916124	-1.26733	-0.679431	-0.516504	-0.192432	0.00674364	0.126716	-0.552663	-0.588645	0.120225	0.100531	0.0346948	-0.19363	-1.18952	-1.30626	-0.814976	-1.25337	-1.16834	0.852484	0.124213	-0.881042	-0.80062	-0.510295	-0.609093	0.0177398	-0.388506
AAGTTCGAGGATACCG-1_1	Cancer_HGSOC1	7100	2159	21.5493	NA	NA	4	4	0.241379	Singlet	Tumor	T_cells	T	0.248075	-0.151181	0.392796	-0.137988	-0.102674	-0.177575	0.362138	0.313186	0.253695	0.0405512	-0.449336	-0.766811	-0.147471	-0.461529	-0.17082	0.149238	-0.379493	-0.271719	-0.0696231	-0.206619	0.91545	-0.29384	0.264789	1.34481	1.01141	0.955475	0.676633	0.304884	0.748574	0.984623	-0.351243	-0.00985798	0.081667	0.035151	-0.0657069	-1.53954
AAGTTCGAGTAACCTC-1_1	Cancer_HGSOC1	4537	1858	6.54618	NA	NA	2	2	0.234306	Singlet	Tumor	T_cells	CD4T	-0.586448	-0.290892	0.357657	-0.40453	-0.739079	-0.792849	-0.398102	-0.723568	-1.17024	-0.759683	-0.319681	-0.802516	-0.370693	0.133519	-0.401262	-0.351023	-0.61414	-0.684642	-0.0200254	0.0334855	-0.62363	0.0824959	0.357114	0.117881	-0.654062	0.0242303	-0.72062	-0.559499	0.340428	0.137729	-0.830622	-0.158458	-0.271941	-0.221446	-0.174091	-1.16057
AAGTTCGGTCTTACTT-1_1	Cancer_HGSOC1	3789	1496	10.9792	NA	NA	9	9	0.232538	Singlet	Tumor	NK_cell	CD8T	-1.01401	-0.91106	0.011841	-0.237762	-0.161346	-0.726923	-1.29153	-0.51804	-0.0422164	0.0747324	-0.270781	-0.143739	-0.733981	-0.726063	-0.37643	-0.597163	-0.5633	-0.699131	-0.187972	-0.976969	-1.4622	-0.52144	-0.603914	-0.503216	0.357004	-0.20281	1.29312	1.13469	0.844614	0.773276	-0.901072	-0.495331	-0.666885	-0.646051	-0.987638	-0.126153
AAGTTCGGTGTCATTG-1_1	Cancer_HGSOC1	515	373	2.52427	NA	NA	1	1	0.262599	Singlet	Tumor	Monocyte	myeloid	-0.116321	-1.17853	-1.20651	-1.05699	-0.409888	-0.750202	-1.12183	-1.47863	-0.811176	-0.710202	-0.340221	-1.27607	-1.21526	-0.83635	-0.509167	-0.705445	-0.649419	-0.967824	-1.01243	-1.15847	-0.904261	-0.741472	-1.27222	-1.31526	-1.50032	-1.00799	-1.56464	-1.60223	0.982336	-0.391703	-1.19542	-1.25868	-1.51613	-0.987259	-0.611879	-0.8434
AATAGAGAGTAGACCG-1_1	Cancer_HGSOC1	4604	1410	7.23284	NA	NA	2	2	0.225464	Singlet	Tumor	T_cells	CD4T	0.791273	-0.881414	0.113818	0.0924713	-0.814156	-0.387099	-1.69668	-0.598103	1.09771	-0.452964	-0.497929	-0.440888	-0.310766	-0.607547	-0.3477	-0.341659	-0.875399	-1.02739	-0.394014	-0.866471	0.146454	-0.522635	-0.0631503	-0.221085	-0.445886	0.460333	-1.01786	-0.9303	0.29126	0.408441	-0.784171	-0.507099	-0.40901	-0.312164	0.177533	-0.0396577
AATAGAGCAAGCCATT-1_1	Cancer_HGSOC1	15927	3851	19.3759	NA	NA	1	1	0.320071	Singlet	Tumor	Macrophage	myeloid	0.319667	0.840109	1.14559	1.02321	1.01261	0.336918	0.564129	1.20698	1.26871	0.95392	1.512	2.35545	0.311967	0.0723059	0.247955	0.715097	0.748365	0.895295	0.361536	0.427367	-0.0832729	1.50024	0.999568	1.78213	1.98052	1.86565	-0.352476	0.460294	-1.42496	1.92485	1.33019	0.9474	0.539299	0.270026	0.567055	-0.352892
AATAGAGCACCATTCC-1_1	Cancer_HGSOC1	2440	1094	14.0164	NA	NA	4	4	0.229885	Singlet	Tumor	NK_cell	T	0.0561988	-0.746035	-0.322679	-0.846779	-0.426536	-0.714484	-0.17583	-0.590572	-1.35015	-0.674165	-0.675679	-1.2653	-0.943749	-0.689334	-0.205292	0.00634692	-0.393467	-0.65116	-0.436653	-1.0365	-0.266375	-0.453652	-0.0739591	0.0947389	-0.990467	-0.268662	-0.453499	-0.377718	1.38233	0.24972	-0.328115	-1.0032	-1.05179	-0.305594	-0.555699	0.14982
AATAGAGCATGTCTAG-1_1	Cancer_HGSOC1	3289	1531	18.273	NA	NA	3	3	0.221043	Singlet	Tumor	NK_cell	NK	-1.2774	-0.777646	0.159251	-0.446364	0.227965	-0.252245	-0.337615	-0.31654	-0.560872	-1.17018	-0.848936	-0.445362	-0.573093	-0.62366	-0.538123	-0.60099	-1.03971	-1.05488	-0.413896	-0.78178	0.359312	-0.728926	-0.616529	-0.215228	-0.430175	-0.450561	-0.766207	-0.21348	0.836365	0.67491	0.11719	-0.724232	-0.901663	-0.114814	-0.714048	-1.08621
AATAGAGGTCCATACA-1_1	Cancer_HGSOC1	1521	874	14.2669	NA	NA	4	4	0.186561	Singlet	Tumor	T_cells	T	-0.60527	-1.43412	-0.37499	-0.906937	-0.179471	-0.75603	-0.527167	-0.710262	-1.15001	-1.02368	-0.716591	-1.19149	-1.17683	-0.517375	-0.298566	-0.434743	-0.726475	-1.38011	-0.694318	-1.07474	0.212251	-0.438354	-0.718088	-0.22266	-0.190561	-0.514791	-1.34743	-1.51249	0.739264	-0.5709	-0.468447	-1.29667	-1.35419	-0.725042	-0.151366	-0.560621
AATAGAGGTCTCAGAT-1_1	Cancer_HGSOC1	12880	3792	17.0031	NA	NA	0	0	0.282051	Singlet	Tumor	Epithelial_cells	epithelial	0.356622	0.635634	-0.957411	1.71513	1.08569	0.995251	1.94532	0.311007	-0.175093	0.163574	0.776878	-0.017753	-0.263196	0.409686	0.128938	1.29402	0.607602	-0.109708	0.00854613	0.637514	2.23384	0.900328	0.21841	-0.200515	0.173306	-0.601955	-0.113282	-0.228677	-0.606344	0.0505552	0.317327	0.0360441	0.15202	0.236848	1.45666	0.460977
AATAGAGTCACCTTGC-1_1	Cancer_HGSOC1	7662	2965	15.2049	NA	NA	7	7	0.211317	Singlet	Tumor	NK_cell	CD8T	1.20508	-0.23438	0.663175	0.299993	-0.849083	-0.270499	1.03357	0.219894	-1.15609	0.209764	-0.690328	0.0350119	0.161641	2.00484	-0.246293	-0.459721	-0.210331	0.071568	2.12102	-0.180291	-0.368061	-0.0748883	0.325649	0.106765	0.457925	0.204497	-0.728867	-0.156493	-0.706272	1.079	1.6878	0.267116	0.265892	0.186046	-0.186223	0.147132
AATAGAGTCGTTCAGA-1_1	Cancer_HGSOC1	2249	784	9.5598	NA	NA	2	2	0.205128	Singlet	Tumor	T_cells	CD4T	0.21298	-1.11071	-0.837184	-1.13718	-0.685948	-0.773239	-0.861064	-1.18474	-0.676604	-0.294206	-0.846059	-1.51601	-0.946269	-0.800429	-0.471146	-0.493417	-0.951476	-0.82076	-0.836854	-0.942151	-1.08988	-0.948251	-1.15381	-1.2207	-0.838755	-0.747366	-1.55713	-1.41165	0.730877	-0.611952	-1.28688	-0.911036	-0.696171	-0.883413	-0.940834	-0.974727
AATCACGAGTGCACCC-1_1	Cancer_HGSOC1	1955	928	23.8363	NA	NA	4	4	0.212202	Singlet	Tumor	NK_cell	T	0.0744765	-1.13792	-0.375622	-0.96172	-0.564224	-0.405225	0.386034	-0.661379	-1.15349	-0.819905	-0.705951	-0.998575	-0.922781	-0.750133	0.0808528	-0.721012	-0.850721	-0.457358	-0.721917	-0.857773	-0.431919	-0.652605	-0.534075	-0.479341	-0.503474	-0.0401009	-1.31479	-0.835419	0.5495	0.204042	-0.755862	-0.927548	-1.45384	-0.699024	-0.287833	-0.581412
AATCACGCATACAGGG-1_1	Cancer_HGSOC1	8611	2800	20.4622	NA	NA	0	0	0.274094	Singlet	Tumor	Epithelial_cells	epithelial	0.438763	0.29419	-0.976299	0.483105	1.01583	1.18497	0.99471	-0.135396	1.18523	0.52149	0.393505	-0.666734	-0.00699359	0.31812	-0.0403341	0.138496	0.276536	-0.000305771	0.400016	0.261143	0.846257	0.615778	-0.674469	-1.62781	-0.610449	-1.29732	-1.38571	-1.6283	-0.111859	-1.29156	0.41748	0.15564	0.393216	-0.513674	1.12125	0.188871
AATCACGGTCAAACGG-1_1	Cancer_HGSOC1	9455	3177	4.73823	NA	NA	3	3	0.16092	Singlet	Tumor	NK_cell	NK	0.254044	0.0496815	1.80052	0.10828	-0.458114	-0.00404975	0.604972	-0.178283	-1.21463	-0.179836	-0.637435	0.34761	0.50917	0.151226	-0.173357	-0.702633	-0.555062	0.199709	0.222133	-0.142763	-0.249957	0.51634	0.320071	0.745445	0.754615	0.30105	-0.752589	0.20986	-0.869391	0.376955	0.763803	0.898825	0.75301	-0.528076	-0.117722	0.208259
AATCACGGTTGCTTGA-1_1	Cancer_HGSOC1	6921	2059	16.8328	NA	NA	1	1	0.296198	Singlet	Tumor	Macrophage	myeloid	0.945664	-0.298596	0.0250215	-1.06397	-0.0925918	-0.566474	-1.20484	0.281349	-1.97512	-0.441471	0.515308	0.463478	-0.11565	-0.247033	-0.308216	-0.535356	-0.426851	-0.679953	0.0030594	-0.911932	-0.197845	0.162082	0.0655925	0.443113	0.419939	1.21276	-0.500211	-0.30788	0.307823	0.144162	0.42447	-0.729117	-0.625702	-0.770486	-0.539081	-1.00546
AATCGACAGAACTCCT-1_1	Cancer_HGSOC1	2264	1163	15.8127	NA	NA	4	4	0.191866	Singlet	Tumor	NK_cell	T	-0.194634	-1.0755	-1.2272	-0.66472	-0.961441	-0.257057	-0.10467	-1.21758	0.348441	-0.68295	-0.340587	-0.862641	-0.917418	-0.775663	-0.719027	-0.293553	-0.631965	-0.826856	-0.431267	-1.15619	-1.2672	-0.942918	-0.911025	-0.895697	-1.4063	-1.1338	-1.52844	-1.54775	0.836715	-0.669522	-0.490379	-1.13664	-1.46979	-0.680686	-0.659774	-1.15162
AATCGACAGAGCAGCT-1_1	Cancer_HGSOC1	4531	1885	5.47341	NA	NA	3	3	0.166225	Singlet	Tumor	NK_cell	NK	-0.688244	-0.226164	0.885339	-0.535135	-0.572951	-0.194082	0.968686	-0.119207	-0.740447	0.166319	-0.959911	0.109244	-0.326908	-0.410345	-0.33685	-0.725783	-0.626653	0.273125	-0.9067	0.0914889	-0.17161	-0.924862	0.0906405	0.00313249	0.0625143	0.324671	-0.304373	-0.139443	-0.0829029	0.110103	-0.466826	0.0124353	-0.2025	0.216151	-0.588175	-1.38203
AATCGACAGGGAGTTC-1_1	Cancer_HGSOC1	4548	1685	11.4336	NA	NA	3	3	0.198939	Singlet	Tumor	NK_cell	NK	-1.18267	-0.747831	0.130839	-0.197273	-0.167217	-0.0570041	0.412056	-0.305947	-0.815465	-0.0858807	-0.334842	-0.409871	-0.333191	-0.430035	-0.194233	-0.460625	-0.124422	-0.267094	-0.341498	-0.895954	0.240797	-0.662861	-0.0317112	-0.186131	0.0819449	-0.575425	-0.165411	-0.442969	0.218507	-0.000377457	-0.0696565	-0.514438	-0.329497	0.0736262	0.102731	-0.815386
AATCGACCAAACTCTG-1_1	Cancer_HGSOC1	7297	2562	11.8542	NA	NA	2	2	0.190981	Singlet	Tumor	T_cells	CD4T	-2.27972	-0.181865	1.08003	-0.406695	-0.800099	-0.178898	0.83203	0.180784	-0.54227	-1.38391	-0.930216	-0.483306	-0.286842	-0.0823852	-0.633862	-0.644319	-0.616427	-0.260869	-0.192605	0.0354896	-0.545894	-0.0317524	0.0551915	0.458487	-0.122599	0.0286898	-0.825734	-0.211253	-0.0849094	0.597893	0.707946	-0.0559546	-0.101463	-0.434796	-0.663577	-0.802923
AATCGACCACCAACAT-1_1	Cancer_HGSOC1	6367	1840	0.518297	NA	NA	0	0	0.292661	Singlet	Tumor	Epithelial_cells	epithelial	0.316338	0.303864	-0.759818	-0.0392026	-1.01549	-0.517337	-0.371315	-0.403465	-0.578413	-0.035857	-0.0950005	-0.819145	0.145562	0.109434	-0.268807	0.252936	0.163167	0.179026	-0.0491922	0.366663	-1.32589	-0.00675989	0.052648	-1.02795	-0.540644	-1.26339	-1.0275	-1.08945	0.588042	-0.540369	-0.34157	-0.169741	0.462456	0.428595	-0.0774351	0.489967
AATCGACCACGAAGAC-1_1	Cancer_HGSOC1	12431	3522	8.12485	NA	NA	1	1	0.276746	Singlet	Tumor	Monocyte	myeloid	0.769805	0.493469	1.14475	0.524058	0.18017	0.709775	-0.484384	1.02692	-0.132819	0.392664	1.50974	1.43266	0.521267	0.102854	-0.406366	-0.300049	-0.00911977	0.79663	0.68972	-0.264587	1.50232	0.939893	0.405972	0.720261	1.15279	1.02999	2.06453	2.03108	-0.6366	1.66732	0.56941	0.594906	0.46671	-0.307773	0.73548	1.62484
AATCGACCAGTTGAAA-1_1	Cancer_HGSOC1	4885	1864	7.47185	NA	NA	2	2	0.217507	Singlet	Tumor	T_cells	CD4T	0.319549	-0.377188	-0.00248598	-0.349173	-0.229852	-0.621827	-0.0866558	-0.632218	-1.2155	-0.775878	-0.0934863	-0.0930955	-0.435599	-0.250592	-0.556944	-0.647533	-0.430654	-0.649116	-0.23876	-0.737549	-0.553415	-0.0570189	-0.643421	-1.11553	-0.0900107	-0.950216	-0.513696	-0.767274	0.0903093	-0.00512959	-0.633228	-0.568118	-0.321109	-0.46307	-0.0507422	-0.485576
AATCGACTCCCAAGTA-1_1	Cancer_HGSOC1	14125	3452	8.3823	NA	NA	1	1	0.243148	Singlet	Tumor	Macrophage	myeloid	0.223122	0.353937	0.971738	0.152158	0.362399	0.355505	0.72239	1.47786	-0.768849	0.43228	0.901983	1.52696	0.297483	-0.266954	-0.0199834	0.492475	0.386397	0.167549	0.179775	-0.388624	-1.04856	0.191751	0.6692	0.730302	1.61459	1.69946	0.245533	0.824522	-1.47023	2.31858	0.494426	0.248656	0.224952	-0.0988813	0.670712	0.70796
AATCGACTCGAGATGG-1_1	Cancer_HGSOC1	5217	2080	3.25858	NA	NA	5	5	0.236958	Singlet	Tumor	T_cells	CD8T	-0.769591	-0.238646	0.418582	-0.420105	-0.374789	-0.0442336	-1.33497	-0.0576058	1.73261	-0.457762	-0.904099	0.231607	-0.381317	-0.422836	-0.407337	-0.385632	-0.139589	-0.338388	-0.0624079	-0.266509	-0.411566	-0.218872	0.318959	0.832373	-0.428131	0.236824	0.361323	0.34062	0.584068	0.595652	0.0497324	0.172615	0.028704	-0.0976786	-0.478701	0.0610739
AATCGTGAGAACCGCA-1_1	Cancer_HGSOC1	6393	2021	17.4253	NA	NA	1	1	0.298851	Singlet	Tumor	Macrophage	myeloid	0.351998	-0.353079	-0.0774126	0.0113065	0.46771	-0.374823	-0.637676	0.417312	-0.411467	0.628031	0.903977	1.25885	-0.345876	-0.031881	0.0764323	-0.321786	-0.341382	-0.120815	-0.00375713	-0.309049	1.97827	-0.159758	0.689287	0.760873	1.31507	1.34807	0.115304	0.441927	0.372858	1.70051	0.109503	-0.0549391	-0.518542	-0.236189	0.51153	-0.0753677
AATCGTGAGAGTCTTC-1_1	Cancer_HGSOC1	4256	1739	8.95207	NA	NA	3	3	0.208665	Singlet	Tumor	NK_cell	NK	-0.173194	-0.70297	0.576385	-0.658703	-1.05538	-0.752311	0.495654	-0.395525	-0.601278	-0.60512	-0.786357	-0.606842	-0.397145	-0.581441	-0.239894	-0.358983	-0.574609	-0.181071	-0.268498	-0.125116	0.262115	-0.261062	0.221395	0.214511	-0.289932	0.448043	-0.588123	-0.655947	0.448691	-0.563239	-0.37385	-0.49933	-0.0959461	0.0281651	-0.160431	0.466049
AATCGTGAGATGCTAA-1_1	Cancer_HGSOC1	5829	2162	8.28616	NA	NA	3	3	0.214854	Singlet	Tumor	NK_cell	NK	0.9841	-0.174978	0.973973	-0.587149	0.0523943	0.0850794	-0.265126	-0.412158	0.230808	-0.623363	-0.519385	-0.229229	0.0769356	-0.373861	-0.357324	-0.464783	-0.877724	0.12789	-0.0761456	-0.351906	-0.0613197	-0.101491	-0.500281	0.416235	-0.0776346	-0.195178	-0.718781	0.0593203	-0.536494	-0.353733	0.177317	-0.368592	-0.158516	-0.234045	-0.497427	-0.454208
AATCGTGAGCGTGCCT-1_1	Cancer_HGSOC1	2916	1317	12.8601	NA	NA	3	3	0.21397	Singlet	Tumor	NK_cell	NK	-0.325541	-0.971865	0.388224	-1.01843	-0.86953	-0.501113	-0.830734	-0.482778	-1.24138	-0.554882	-0.573508	-0.735641	-0.584747	-0.350993	-0.0953434	-0.599227	-0.370386	-0.343883	-0.375942	-0.653944	-0.096719	-0.677721	-0.760401	-0.366463	0.229002	-0.455733	-0.629332	-0.186825	0.631378	-0.233261	-0.174628	-0.771029	-0.781192	-0.727817	-0.242771	-1.13213
AATCGTGCAAACTAGA-1_1	Cancer_HGSOC1	19726	2993	2.99098	NA	NA	10	10	0.250221	Singlet	Tumor	NK_cell	B	0.543113	0.192369	1.21438	0.374259	-0.772738	0.061025	-0.61379	0.850046	-1.67466	0.265914	-0.468319	0.482081	0.560513	0.0755965	-0.756576	0.0297909	-0.224556	0.0818718	-0.197538	-0.413652	-0.717367	0.840739	0.156149	0.397514	0.905538	0.0456172	-0.144138	0.711888	-1.13949	-0.0354634	-0.469898	0.231894	0.487206	0.141387	0.0895935	-1.26896
AATCGTGCACTTCTCG-1_1	Cancer_HGSOC1	16444	3640	9.80905	NA	NA	1	1	0.282935	Singlet	Tumor	Monocyte	myeloid	0.517188	0.739094	1.71677	0.432279	0.927391	0.792156	1.91867	1.54761	-0.623228	0.938699	0.638723	2.12047	0.447984	0.167008	-0.239296	0.618407	0.602343	0.933259	0.0790733	0.402562	0.376181	0.386716	1.61483	1.53094	2.38926	2.84731	-0.00965449	0.582087	-1.07275	2.59983	0.517403	0.826649	0.591371	-0.330253	0.402033	0.434087
AATCGTGCACTTTAGG-1_1	Cancer_HGSOC1	15934	4157	13.9827	NA	NA	0	0	0.323607	Singlet	Tumor	Epithelial_cells	epithelial	0.102087	0.980772	-1.26719	1.18958	0.699905	1.41747	0.811024	1.36749	0.628187	1.09498	0.801027	-0.224075	0.867685	0.615793	0.392158	1.69038	1.14735	0.632215	0.432552	0.232792	0.507278	0.506022	1.26297	0.182033	-0.692727	-0.895342	0.165687	0.0935922	0.505768	-1.15613	1.19369	0.3219	0.563357	1.18824	2.27422	0.963752
AATCGTGGTCACAATC-1_1	Cancer_HGSOC1	3865	1642	5.09702	NA	NA	3	3	0.19275	Singlet	Tumor	NK_cell	NK	0.211871	-0.649962	0.344028	-0.682737	-0.612143	-0.618156	-0.759641	-0.604526	-0.795423	-0.187013	-0.741528	-0.146438	-0.692622	-0.488819	-0.238901	-0.604932	-0.584832	-0.139846	-0.57085	-0.931504	1.29092	-0.425128	-0.512174	0.91429	-0.379444	0.267741	-0.217098	0.0406856	0.694816	0.771851	-0.319028	-0.24836	-0.421167	-0.42759	-0.00523301	-0.665787
AATCGTGGTGAGAACC-1_1	Cancer_HGSOC1	8041	2033	9.11578	NA	NA	2	2	0.236958	Singlet	Tumor	T_cells	CD4T	-0.777692	-0.53771	0.222924	-0.0845455	-1.25623	-0.473812	0.106457	-0.9294	-0.85327	-0.228241	-0.928278	-1.03474	-0.316586	-0.429107	-0.471005	-0.406084	-0.835642	-0.511299	-0.313399	-0.82438	-0.715199	-0.105375	-0.694357	0.00680823	-0.0576365	0.211282	-1.05476	-0.764008	-0.208659	0.275911	-0.233048	-0.503698	-0.0850728	0.0605964	-0.620975	-0.19246
AATCGTGGTGCAGTGA-1_1	Cancer_HGSOC1	3166	1160	23.4049	NA	NA	1	1	0.342175	Singlet	Tumor	Macrophage	myeloid	0.4103	-0.774189	-0.242717	-0.483892	1.13749	-0.532945	-0.714686	0.0414313	-0.507846	-0.42403	1.27237	0.06337	-1.11139	-0.915431	0.0794796	-0.679741	-0.82762	-0.745062	-0.745302	-0.977158	0.605757	-0.391935	-0.675049	-0.173331	0.415483	0.584409	-1.0503	-0.601585	0.381051	0.529763	-0.0348863	-0.757136	-1.23356	-0.765471	-0.210755	-1.1476
AATCGTGGTTAAACCC-1_1	Cancer_HGSOC1	1408	884	2.69886	NA	NA	4	4	0.179487	Singlet	Tumor	T_cells	T	-0.600397	-1.03016	-0.47677	-0.92133	-0.429104	-1.23955	-1.23326	-1.03362	-0.849106	-0.755058	-0.688731	-1.13235	-1.08015	-1.00028	-0.689953	-0.477588	-0.707687	-1.23277	-0.780011	-1.08867	-0.877489	-0.390529	-0.938264	-0.350317	-0.369629	-0.789036	-0.859783	-0.730369	1.01283	0.212265	-0.641645	-1.14708	-1.54788	-1.08006	-0.630235	-1.28422
AATCGTGTCAGACCTA-1_1	Cancer_HGSOC1	44496	2671	2.13727	NA	NA	8	8	0.221043	Singlet	Tumor	B_cell	B	-0.512588	0.511067	-0.557625	0.503796	-0.48966	-0.73171	-1.16697	-0.3345	-1.01994	-0.0790418	-0.851574	0.301127	0.423576	-0.20169	-0.459719	-0.418662	-0.168392	0.282249	-0.233729	0.519962	-1.04434	0.293713	-0.237042	-0.107573	-0.327387	-0.475141	-0.47363	-0.136764	-0.54915	-0.0731357	-0.515242	0.324458	0.434559	-0.00767313	-0.476667	-0.353314
AATCGTGTCCAACCAA-1_1	Cancer_HGSOC1	11500	3161	11.1478	NA	NA	1	1	0.329797	Singlet	Tumor	Macrophage	myeloid	1.92666	0.835522	1.51636	0.568975	0.766937	0.188685	1.03976	1.08667	0.34196	0.504029	1.34999	2.36708	0.194756	0.102327	0.0886322	-0.479265	-0.27956	1.09704	0.333115	0.52204	0.514186	0.628202	0.87583	0.729279	2.44346	2.86746	0.947594	1.42121	0.0465726	1.55244	0.540522	0.914116	0.533579	-0.341937	-0.107814	-0.591257
AATCGTGTCTGTTCAT-1_1	Cancer_HGSOC1	11774	3898	6.35298	NA	NA	0	0	0.323607	Singlet	Tumor	Epithelial_cells	epithelial	-1.62665	0.81408	-0.707039	0.791979	0.306075	1.31895	0.898623	1.11795	-0.0239756	1.35192	1.01589	0.958488	-0.1528	0.184232	0.0698637	1.37129	1.23438	0.412195	0.186997	0.560738	0.924045	1.3886	0.446753	-0.0372542	0.914941	-0.0865303	0.023066	0.245505	-0.113151	0.263224	1.07084	0.44475	0.259976	0.608006	1.31349	1.11334
AATGAAGAGCATTTGC-1_1	Cancer_HGSOC1	5325	1579	16.6197	NA	NA	1	1	0.285588	Singlet	Tumor	Macrophage	myeloid	1.05468	-0.56701	0.456524	-1.06128	-0.217218	-0.377179	-0.426572	-0.0676123	-0.457507	-0.250189	1.01978	0.733756	-0.548183	-0.310784	-0.16502	-0.257844	-0.301807	-0.733229	-0.511537	-0.459847	-0.734068	-0.817162	-0.113363	0.293948	1.06669	1.50063	-0.622862	-0.256181	1.45175	1.41785	-0.40897	-0.657712	-0.712872	-0.481113	-0.433384	-0.168227
AATGAAGCAAAGACTA-1_1	Cancer_HGSOC1	565	432	7.78761	NA	NA	0	0	0.2458	Singlet	Tumor	NK_cell	epithelial	0.39099	-0.831619	-1.20981	-0.85458	-0.41958	-1.04364	-0.189517	-1.39748	-0.419705	-0.38567	0.220155	-1.03396	-1.12865	-0.946605	-0.215425	-0.402618	-0.692985	-0.694753	-1.25228	-1.03327	-0.170593	-0.677693	-1.05665	-0.901469	-1.03178	-0.582669	-1.23385	-1.77302	1.9301	-1.06618	-1.15601	-0.874737	-1.43287	-0.549799	-0.0948606	-1.05148
AATGAAGCACGAGAAC-1_1	Cancer_HGSOC1	9156	2512	12.6147	NA	NA	1	1	0.244916	Singlet	Tumor	Macrophage	myeloid	2.91766	0.0147802	0.0244697	0.438765	1.42421	-0.336902	-0.188957	0.523971	0.0408799	-0.227155	0.606861	0.935176	0.285356	-0.565795	0.160503	-0.274279	-0.573682	-0.741326	-0.38583	0.0159959	0.325886	-0.376731	0.692052	0.168975	1.13212	1.3929	-0.239632	0.134518	1.16696	1.49982	0.506902	0.122843	-0.21363	-0.0532002	0.404236	-0.191364
AATGAAGGTTGGACTT-1_1	Cancer_HGSOC1	7612	3068	6.97583	NA	NA	11	11	0.209549	Singlet	Tumor	Endothelial_cells	endothelial	-1.46831	0.0401319	-0.902535	1.26786	2.39573	0.630756	1.52865	0.152074	-0.600141	0.0276136	0.680522	-0.0489973	-0.0635974	-0.189507	0.996214	0.610074	0.155049	0.160235	-0.204521	-0.194184	1.1609	0.380062	0.230734	0.259132	0.402584	0.00451763	-0.392833	-0.8222	-0.0657075	0.301019	0.788165	-0.274037	0.358254	-0.124766	1.01093	-0.160016
AATGAAGTCCAAACCA-1_1	Cancer_HGSOC1	7540	1620	6.68435	NA	NA	8	8	0.221927	Singlet	Tumor	B_cell	B	0.114979	-0.577779	-0.989106	-0.177819	-0.87532	-0.870258	-1.14874	-0.772282	-2.05053	-0.479392	-0.637671	-0.434823	-0.199515	-0.360035	-0.392836	-0.661536	-0.929089	-0.864955	-0.157299	-0.410583	-0.943603	-0.13584	-0.790821	-0.255342	-0.319924	-0.227075	-0.900171	-0.550639	0.546154	0.181994	-0.455068	-0.316858	-0.287849	-0.322693	-1.04816	-1.3986
AATGAAGTCGCAAGAG-1_1	Cancer_HGSOC1	4509	1712	5.85496	NA	NA	2	2	0.219275	Singlet	Tumor	T_cells	CD4T	0.282069	-0.619176	-0.224175	-0.581326	-0.311977	-0.496978	-0.208925	-0.146587	-1.23567	-1.00051	-0.844761	-0.48216	-0.489384	0.100331	-0.336874	-0.745771	-0.723625	-0.453775	-0.205656	-0.606689	-0.380288	-0.623627	-0.342974	-0.289124	-0.209881	-0.235284	-0.346405	-0.588527	0.451586	-0.0758396	-0.736109	-0.683083	-0.144617	-0.203245	-0.418592	-0.614018
AATGACCAGCCTCTGG-1_1	Cancer_HGSOC1	1720	846	12.907	NA	NA	4	4	0.202476	Singlet	Tumor	T_cells	T	0.357794	-1.086	-1.10357	-1.02978	-0.421993	-1.00115	-0.121119	-0.604587	-0.0301004	-0.684098	-0.420872	-1.02094	-1.18794	-0.732833	-0.605797	-0.473237	-0.875569	-0.757884	-0.779709	-0.717007	-1.1238	-1.03444	-1.30028	-0.660023	-0.765503	-0.592846	-0.791307	-0.39731	0.957633	-0.318819	0.086222	-1.06069	-1.48792	-0.747249	-0.746228	-1.2647
AATGACCCATCGATAC-1_1	Cancer_HGSOC1	12004	3360	9.37188	NA	NA	1	1	0.274978	Singlet	Tumor	Macrophage	myeloid	0.282933	0.535007	0.640308	0.543347	-0.0506137	-0.0643658	-1.40453	1.00074	0.787318	0.762037	1.62169	1.87987	-0.113643	-0.0217142	-0.282211	-0.284927	-0.167555	0.269838	0.130248	0.113662	-0.211304	0.528105	0.0546397	0.800388	2.06482	1.54616	0.803009	0.950616	-0.889618	2.25127	0.366571	0.504763	0.313671	0.0359813	0.236183	1.70749
AATGACCGTCTCCTGT-1_1	Cancer_HGSOC1	6486	2112	7.9556	NA	NA	2	2	0.244032	Singlet	Tumor	T_cells	CD4T	0.0730165	-0.383513	-0.0702181	-0.437135	-0.340125	-0.277252	0.284658	0.283969	-0.810221	-0.163455	-0.492344	-0.171666	-0.106882	-0.167923	-0.350686	0.00193268	0.0952832	-0.729661	-0.0516256	-0.594132	-0.459285	-0.0358504	0.161781	0.547961	0.796671	0.284117	-0.0974717	0.386153	0.238803	0.381889	0.282955	-0.075981	-0.0844698	-0.0479709	-0.529346	0.0860931
AATGACCGTGGACCTC-1_1	Cancer_HGSOC1	6988	2397	8.37149	NA	NA	9	9	0.227233	Singlet	Tumor	T_cells	CD8T	-0.0208777	-0.342955	0.937993	0.0426746	0.451897	-0.463297	0.352424	0.286109	0.7543	-0.273351	-0.718313	-0.219322	-0.253691	-0.508346	-0.283191	-0.248679	-0.228673	-0.0666964	-0.268599	-0.428935	-1.08907	-0.0223287	-0.0628026	0.830101	0.15918	-0.162064	2.26913	1.83284	0.359087	0.213114	-0.17096	-0.00591853	0.0798084	-0.49968	-0.912769	-0.568502
AATGACCGTGGTCCCA-1_1	Cancer_HGSOC1	16517	4311	7.8949	NA	NA	3	3	0.214854	Singlet	Tumor	NK_cell	NK	0.636673	0.987289	1.39627	0.175188	-0.36779	0.287366	3.05953	0.902037	0.661509	1.19196	-0.912168	0.795136	1.39905	1.52066	-0.950881	-0.219461	-0.0774181	1.08688	1.28682	0.384716	-1.45142	0.85207	0.539694	1.13407	-0.148435	-0.286651	-0.605745	0.373416	-1.7962	0.142574	0.837616	1.42396	1.51941	2.10442	-0.0814925	-0.169701
AATGACCGTTCTTGTT-1_1	Cancer_HGSOC1	22345	4868	22.9626	NA	NA	0	0	0.311229	Singlet	Tumor	Epithelial_cells	epithelial	1.32785	1.46403	-0.871443	1.10187	1.4701	1.4294	0.917368	0.43435	0.757821	0.760165	0.905515	0.37102	1.25434	0.462759	0.204413	2.00723	1.84666	1.07442	0.403709	0.674579	1.8477	1.1915	0.948326	-0.000117981	-0.564386	-0.730158	-0.265765	0.058303	0.00333763	-0.653231	1.08791	0.845565	0.710828	0.72369	1.9218	1.44172
AATGCCAAGATGTTAG-1_1	Cancer_HGSOC1	2156	1010	14.3785	NA	NA	3	3	0.221927	Singlet	Tumor	NK_cell	NK	-0.739727	-1.24432	-0.379038	-1.44554	-0.809552	-0.87561	-0.731506	-1.01908	-0.966188	-0.859984	-0.973631	-1.09638	-0.847102	-0.325258	-0.407837	-0.341777	-0.383414	-1.2353	-0.85217	-1.0241	-1.22406	-0.81971	-0.543915	0.0508419	-0.947453	-0.829971	-1.47675	-1.12963	0.786951	-0.911305	-0.816214	-1.01049	-1.33603	-0.620201	-0.830754	-1.09162
AATGCCAAGGCATCAG-1_1	Cancer_HGSOC1	1930	934	21.1399	NA	NA	4	4	0.17595	Singlet	Tumor	T_cells	T	-0.636435	-1.25715	-0.540751	-0.749843	-0.759528	-0.814027	-1.41729	-1.49667	-0.637893	-1.00174	-0.614405	-0.947804	-0.840431	-0.621741	-0.333458	-0.225177	-0.95683	-0.866987	-0.602744	-1.06674	-1.16715	-0.970687	-0.701839	-1.66149	-1.32274	-0.560028	-1.21518	-1.09512	0.596514	-0.725214	-0.978464	-0.949709	-1.06395	-0.162893	-0.734645	0.414057
AATGCCACATCAGCAT-1_1	Cancer_HGSOC1	6959	2288	0.416727	NA	NA	0	0	0.327144	Singlet	Tumor	Epithelial_cells	epithelial	1.13216	0.680695	-0.6307	0.196438	-0.73997	-0.1947	0.0681819	0.339477	0.098847	0.792936	0.520114	-0.714822	0.435905	-0.340167	-0.494622	0.384457	0.273064	0.233868	-0.604975	-0.0742778	-1.29079	0.368716	-0.279558	-0.898507	-0.580264	-0.825737	-0.474948	-0.93148	1.35059	-1.44731	-0.499604	-0.0320603	0.121819	-0.0570475	0.528355	0.355652
AATGGAAAGAAACTCA-1_1	Cancer_HGSOC1	10369	2887	11.6115	NA	NA	1	1	0.244916	Singlet	Tumor	Monocyte	myeloid	-0.993934	0.395232	1.16587	0.403047	-0.170542	0.859231	0.847319	0.372805	0.810864	-0.152317	0.857062	1.20925	0.491867	-0.201131	0.166537	0.226274	0.20764	0.692316	-0.148187	-0.260494	-0.0368859	0.594314	0.772036	1.1969	2.06722	1.6505	0.918299	1.05797	-0.740548	1.94573	0.119409	0.455099	0.15319	0.105259	0.535661	0.115922
AATGGAACAAATCCCA-1_1	Cancer_HGSOC1	7137	1921	9.13549	NA	NA	12	12	0.229001	Singlet	Tumor	B_cell	B	-1.43006	-0.0728647	0.313671	-0.550382	-1.21328	-0.370722	-1.22822	-0.466652	-1.21494	-0.518135	-0.761179	-0.409423	-0.169898	-0.138298	-0.477803	-0.591944	-0.574722	-0.124305	-0.37677	-0.671345	-0.177152	-0.337246	0.0151501	0.344233	-0.0425893	-0.106014	-0.526554	-0.0975038	0.0766821	0.546915	-0.4413	-0.208327	-0.101859	0.0371276	0.355752	-0.497895
AATGGAACACATATCG-1_1	Cancer_HGSOC1	4219	1711	12.1119	NA	NA	2	2	0.183908	Singlet	Tumor	T_cells	CD4T	-1.40486	-0.933228	0.0178277	-0.314056	-0.132984	-0.630956	0.0331335	-0.352552	-0.274967	-0.305978	-0.5588	0.151028	-0.52687	-0.0187108	-0.365286	-0.478887	-1.07575	-0.716305	0.0231446	-0.642364	-0.985007	-1.11452	0.0860077	-0.547212	-0.430468	0.233579	-0.619635	-0.276235	0.380633	0.0537284	-0.225515	-0.697795	-0.583217	-0.384352	-0.272065	-0.456755
AATGGAACACCCATAA-1_1	Cancer_HGSOC1	8429	2947	7.18946	NA	NA	7	7	0.239611	Singlet	Tumor	NK_cell	CD8T	-0.425106	0.237727	0.747035	0.135704	-0.841249	-0.116506	0.405879	0.442436	-0.980875	0.260313	-0.717294	-0.186187	0.414934	2.56421	-0.646764	-0.767059	0.316548	0.347507	2.65222	0.243551	-0.67625	0.118388	0.17453	0.0828899	-0.0443656	-0.719594	-0.329788	-0.208298	-0.221632	0.196313	1.93105	0.223612	0.431642	0.101532	-0.427959	-0.758982
AATGGAAGTACCGGAA-1_1	Cancer_HGSOC1	1788	820	12.0246	NA	NA	4	4	0.196286	Singlet	Tumor	T_cells	T	-0.551517	-0.815119	-0.650547	-0.862312	-0.305143	-1.00855	-0.484185	-0.698396	-0.594094	-1.06113	-0.282978	-0.862204	-1.06865	-0.862246	-0.26865	-0.593539	-0.467133	-0.927405	-0.691477	-0.751773	-1.12445	-1.12156	-0.62121	-0.657872	0.814445	-0.416024	-0.263323	0.0343287	1.79568	-0.208593	-1.34616	-1.10737	-1.3205	-0.545103	-0.54894	-0.704246
AATGGAAGTCTCGCGA-1_1	Cancer_HGSOC1	2727	1225	19.1419	NA	NA	2	2	0.181256	Singlet	Tumor	T_cells	CD4T	-0.752795	-0.429993	0.369772	-0.724548	-0.492969	-0.955697	-0.959327	-0.572796	-0.421478	-0.273992	-0.464025	-0.749505	-0.722836	-0.789685	-0.354752	-0.510459	-0.0801275	-0.647373	-0.561605	-0.81962	-0.0143569	-0.55479	-0.78088	-0.123433	0.479708	-0.45211	-1.03616	-0.770699	0.172176	0.133167	-0.280641	-0.88311	-0.988703	-0.777445	-0.613455	-1.04601
AATGGAATCAAACCTG-1_1	Cancer_HGSOC1	1675	769	15.403	NA	NA	4	4	0.190981	Singlet	Tumor	NK_cell	T	0.242311	-1.00836	-1.13878	-0.751754	-0.578177	-1.02475	-0.65028	-0.624224	0.0945494	-1.24687	-0.424789	-1.08512	-1.08405	-0.609829	-0.542447	-0.17757	-0.633354	-0.74571	-0.97747	-0.410196	-0.596553	-0.474938	-0.675833	-0.224079	0.0357092	-0.0796528	-1.55234	-1.00621	1.09761	0.349019	-0.594245	-1.13729	-1.12073	-0.61369	-0.820767	-1.2218
AATGGAATCGAGCCAC-1_1	Cancer_HGSOC1	5314	2006	10.0489	NA	NA	3	3	0.20336	Singlet	Tumor	NK_cell	NK	-1.0275	-0.443768	0.799523	-1.1391	-0.666601	-0.789152	0.6952	-0.184986	0.0203778	-0.714157	-0.387174	0.237708	-0.262246	-0.275511	-0.588952	-0.208409	-0.114956	-0.900841	-0.40208	-0.733348	-1.13573	-0.107983	-0.320281	1.03236	0.945293	0.451849	1.10483	0.76062	0.378999	-0.294414	-0.380357	-0.290127	-0.0878259	-0.576751	-0.154766	-0.688223
AATGGAATCTCCTGTG-1_1	Cancer_HGSOC1	2376	1223	4.58754	NA	NA	3	3	0.217507	Singlet	Tumor	NK_cell	NK	-0.936768	-1.19248	-0.13471	-0.275345	-0.255831	-0.579945	0.19326	-0.497529	-0.722667	-0.647918	-0.837997	-0.806737	-1.05457	-0.499573	-0.557747	-0.351702	-0.290723	-1.22164	-0.321586	-0.688199	-0.337751	-0.777219	-0.508056	0.106538	-0.702126	-0.272188	-0.749575	-0.329998	0.596954	0.284262	-0.294674	-1.04015	-0.847242	-0.750898	-0.529491	-0.577224
AATGGAATCTGTAACG-1_1	Cancer_HGSOC1	6882	2188	7.7739	NA	NA	3	3	0.16092	Singlet	Tumor	NK_cell	NK	-0.702784	-0.408996	1.52452	0.0883536	-0.493449	-0.482827	0.272703	-0.419105	-0.535247	-0.267065	-0.167521	0.175414	-0.297817	-0.0709256	-0.325025	-0.419803	-0.630446	0.195453	-0.0903938	-0.437068	-1.14141	-0.435873	0.00193451	0.883342	0.621338	-0.134371	-0.112815	0.0371765	0.38244	0.983593	0.122592	0.159033	0.185863	0.372552	-0.196547	-0.939309
AATGGCTAGAGAATCT-1_1	Cancer_HGSOC1	5436	2022	10.6512	NA	NA	3	3	0.17595	Singlet	Tumor	NK_cell	NK	-1.56806	-0.379062	0.249649	-0.393255	-0.00194595	0.00480705	2.4141	-0.077973	-0.248846	-0.509399	0.092503	0.268719	-0.230857	-0.27531	-0.0812008	-0.930431	-0.854706	-0.447716	-0.561055	-0.415766	0.0390168	-0.15504	-0.262767	-0.559225	-0.728171	-0.175813	-0.65269	-0.824283	-0.110307	0.583018	-0.192106	-0.30375	-0.288153	0.0448602	-0.443861	-0.411053
AATGGCTAGTAGTCTC-1_1	Cancer_HGSOC1	3367	1597	6.53401	NA	NA	5	5	0.212202	Singlet	Tumor	NK_cell	CD8T	-1.3176	-0.844104	0.843127	-0.435966	-0.466648	-0.703249	-0.148202	-0.505236	-0.171248	-0.790879	-0.744205	-0.271991	-0.928222	-0.701582	-0.633832	-0.638494	-0.725872	-0.121901	-0.5241	-0.825642	-0.810398	-1.09437	-0.416876	-0.316168	-0.102934	-0.187579	-0.459542	-0.188035	0.556631	0.0529499	-0.17378	-0.680967	-0.740671	-0.42823	-0.20236	-0.0342941
AATGGCTCACAGCTTA-1_1	Cancer_HGSOC1	4895	1996	6.74157	NA	NA	2	2	0.238727	Singlet	Tumor	T_cells	CD4T	0.406427	-0.441798	0.75433	-0.317704	-0.225674	-0.278032	0.99227	0.28819	-0.000643802	-0.852873	-0.936201	-0.358381	-0.410453	-0.504127	-0.283666	-0.733405	-0.371048	0.296991	-0.375847	0.40843	-0.954929	0.480703	0.407963	-0.113722	0.609325	-0.0747561	-0.387097	-0.0990211	0.157987	0.122356	-0.0961114	-0.223482	-0.375841	-0.033063	-0.219029	-0.628015
AATGGCTCAGACCAGA-1_1	Cancer_HGSOC1	15070	3653	15.6138	NA	NA	0	0	0.305924	Singlet	Tumor	Epithelial_cells	epithelial	-0.111833	0.669727	-1.20929	0.357559	0.736894	0.428833	-1.93894	0.099117	-1.44556	0.580084	0.656086	-0.145442	0.527944	0.478996	-0.361761	1.07917	1.01601	0.741515	0.535931	-0.169881	-0.368406	0.58814	0.0747754	-1.22164	0.181992	-0.415432	-0.33871	-0.594946	-0.262413	-1.26947	0.823943	0.367868	0.808485	0.406094	0.685896	0.160956
AATGGCTGTAGCACAG-1_1	Cancer_HGSOC1	5123	1928	6.51962	NA	NA	2	2	0.231653	Singlet	Tumor	T_cells	CD4T	-0.057707	-0.0362085	0.377736	0.149642	-0.184329	-0.346976	-0.229028	0.287748	-0.976414	-0.575981	-0.62239	-0.403265	-0.269872	-0.541457	-0.249405	-0.595838	-0.416925	-0.530835	-0.201626	-0.679286	0.242047	-0.594222	-0.0925083	0.930103	0.392805	-0.330482	-0.19235	-0.335435	-0.0384576	0.752519	-0.32575	-0.643023	-0.575916	-0.752644	-0.219584	0.073576
AATGGCTGTTCCTAAG-1_1	Cancer_HGSOC1	7423	2396	12.0167	NA	NA	1	1	0.284704	Singlet	Tumor	Macrophage	myeloid	0.357296	-0.396435	0.0980074	-0.383285	0.237277	0.270858	0.524695	0.745942	-1.62701	0.29032	0.958275	0.778476	0.0523915	-0.0467884	-0.0502532	0.325444	0.233077	0.0717183	-0.156592	-0.613129	-1.03734	-0.184209	0.104653	-0.379868	0.876356	1.16831	-0.227801	-0.00539276	0.846384	1.65061	0.114895	-0.318499	0.0686889	-0.325598	-0.32216	1.33927
AATGGCTTCTCGGTAA-1_1	Cancer_HGSOC1	3703	1546	13.3405	NA	NA	3	3	0.195402	Singlet	Tumor	NK_cell	NK	-0.556723	-1.03777	0.48907	-0.763043	-0.557084	-0.650555	0.949119	-0.515278	-0.806798	-0.952303	-0.544724	-0.398082	-0.0981776	-0.305016	-0.533517	-0.7491	-1.07421	-1.21113	-0.200563	-0.769233	0.851942	-0.692304	-1.17495	-0.273649	-0.95979	0.181076	-0.729374	-0.64785	0.132046	0.338809	-0.182009	-0.79863	-0.935912	-1.13867	-0.484789	-0.182397
AATTCCTCAAGGTCTT-1_1	Cancer_HGSOC1	1041	553	17.0029	NA	NA	4	4	0.193634	Singlet	Tumor	NK_cell	T	1.14319	-1.34428	-0.772851	-1.39532	-0.691785	-1.11263	-1.04913	-1.03347	-0.0321589	-0.903651	-0.623145	-1.11044	-1.2164	-0.871492	-0.562567	-0.595008	-0.666083	-1.00705	-0.923784	-1.12284	-0.241708	-0.587077	-1.29683	-1.52054	-1.20696	-0.5052	-1.61553	-1.49612	1.43176	-0.738324	-0.600805	-1.24615	-1.59587	-0.774346	-0.255079	-1.11812
AATTCCTCAATTGCCA-1_1	Cancer_HGSOC1	4300	1371	22.1628	NA	NA	1	1	0.297966	Singlet	Tumor	Monocyte	myeloid	-1.08392	-0.694244	-0.326196	-1.11662	-0.22912	-0.556555	-0.0278171	-0.383604	-1.318	-0.283012	0.242589	0.384557	-0.685209	-0.653344	-0.160718	-0.324442	-0.236743	-0.830474	-0.415837	-0.61648	-1.01659	-0.492083	0.159654	-0.462611	-0.675277	0.736146	-0.838376	-0.684097	0.601365	-0.200602	0.365004	-0.804159	-0.620382	-0.419402	-0.369622	0.0250027
AATTCCTCACTGTGAT-1_1	Cancer_HGSOC1	3008	1365	4.88697	NA	NA	5	5	0.179487	Singlet	Tumor	NK_cell	CD8T	-0.429991	-0.969498	-0.157179	-0.603767	-0.471053	-0.360113	-0.288569	-0.247263	0.218228	-0.535224	-0.617335	-0.778938	-0.956312	-0.994003	-0.271917	-0.263561	-0.625932	-0.742375	-0.633684	-0.722944	-0.62798	-1.09606	-0.348932	-0.736189	-0.458826	-0.00353823	-0.185843	-0.142041	0.852358	-0.591916	-0.549041	-0.879441	-0.966733	-0.82162	-0.329838	-0.94834
AATTTCCAGCTCCCTT-1_1	Cancer_HGSOC1	56911	8201	21.2384	NA	NA	0	0	0.325376	Singlet	Tumor	Epithelial_cells	epithelial	2.13384	2.17029	0.879042	3.18163	1.5361	2.97874	4.12323	2.55985	1.5208	1.59657	1.88037	2.93024	1.83746	2.16577	0.608019	3.48841	3.01125	1.43415	2.5396	1.76224	2.8832	2.62064	2.9283	2.87192	2.30541	2.49617	2.0803	2.16756	-0.993753	2.11877	3.7517	2.16287	1.38914	1.05739	2.48928	2.37427
AATTTCCAGTTTCGGT-1_1	Cancer_HGSOC1	2038	997	13.1501	NA	NA	3	3	0.213086	Singlet	Tumor	T_cells	NK	-0.745767	-1.16753	0.210994	-0.992619	-0.811301	-0.82984	-0.575138	-0.347021	-0.134575	-0.805223	-0.830498	-0.918134	-0.985026	-0.253072	-0.339095	-0.393271	-0.677381	-1.16909	-0.561507	-0.973553	-0.605733	-0.985211	-0.850352	-1.12013	-0.125672	-0.42825	-1.38208	-0.977786	0.602124	-0.018761	-0.487154	-1.04778	-1.09242	-0.256167	-0.404782	-0.936577
AATTTCCCACCCAAGC-1_1	Cancer_HGSOC1	45606	6585	20.9929	NA	NA	0	0	0.30504	Singlet	Tumor	Epithelial_cells	epithelial	0.155838	2.0438	-0.705953	1.41886	1.1372	1.69729	0.690242	1.41596	-0.760918	1.96049	0.518636	0.501909	1.81454	1.22226	-0.129803	2.94228	2.2871	1.21074	1.32232	1.25557	1.86857	1.90896	1.05326	0.900586	-0.531882	-0.426258	0.522325	0.405459	-0.807076	-1.16032	2.21307	1.52143	1.77256	2.27017	1.38254	0.551588
AATTTCCGTCCGTTTC-1_1	Cancer_HGSOC1	3901	1595	7.40836	NA	NA	3	3	0.206012	Singlet	Tumor	NK_cell	NK	-1.3377	-0.768074	0.397683	-0.680958	-0.76229	-0.566593	0.054884	-0.819393	-0.0459023	-0.39262	-0.464992	0.0658737	-0.299475	-0.424171	-0.555271	-0.395794	-0.686652	-0.492497	-0.305659	-0.637099	-0.943411	0.138788	0.120333	-0.567015	-1.06859	0.0637983	-1.09847	-0.682857	0.538989	0.17958	-0.521648	-0.0088907	-0.115018	-0.441518	-0.545771	-1.13643
AATTTCCGTCTGGTTA-1_1	Cancer_HGSOC1	5070	1529	6.64694	NA	NA	2	2	0.217507	Singlet	Tumor	T_cells	CD4T	0.974504	-0.401892	-0.0298108	-0.200979	0.178063	-0.357669	0.925534	-0.437377	-0.0863375	-0.433728	-0.377691	-0.407152	-0.485025	-0.271912	-0.137577	-0.799193	-0.641058	-0.93035	-0.355988	-0.460469	0.2451	-0.185192	-0.293536	-0.363509	0.50685	-0.129142	-0.935131	-0.831667	0.785943	0.827371	-0.910625	-0.404852	-0.376103	-0.697483	-0.516381	-0.695322
AATTTCCTCAAAGACA-1_1	Cancer_HGSOC1	12697	3842	6.28495	NA	NA	7	7	0.216622	Singlet	Tumor	NK_cell	CD8T	-1.4195	0.214631	0.778488	0.615741	-0.334734	-0.0178435	2.50582	0.601112	-0.125943	0.353002	-0.722953	0.907265	0.948326	3.107	-0.676153	-0.478365	-0.00899248	0.751027	2.76765	0.178071	-0.485313	0.70021	0.565325	-0.0229012	-0.435384	-0.166367	-0.467406	0.190823	-1.23505	-0.50442	2.38029	0.954425	1.34878	0.391746	-0.236927	0.259275
AATTTCCTCTTCCAGC-1_1	Cancer_HGSOC1	6938	2470	10.3488	NA	NA	2	2	0.221927	Singlet	Tumor	NK_cell	CD4T	-0.132168	-0.327805	0.763977	0.221661	-0.750982	-0.268552	0.252156	0.281117	0.0169534	-0.346602	-0.474024	0.214521	0.119192	-0.146633	-0.455515	-0.334584	-0.348877	-0.638407	-0.317595	-0.38018	0.365543	-0.262978	0.16035	-0.0176455	0.126593	-0.167864	0.204022	0.339004	-0.0361553	0.730446	0.461526	-0.578026	-0.0460758	-0.640946	-0.14542	-1.09334
ACAAAGAAGCCTGAAG-1_1	Cancer_HGSOC1	2698	1029	17.6056	NA	NA	1	1	0.302387	Singlet	Tumor	Macrophage	myeloid	0.498225	-0.833437	-0.583112	-0.916012	-0.155165	-1.06725	-0.457329	-0.258004	-0.700443	-0.573843	0.328956	0.258368	-1.01473	-0.956384	-0.328523	-0.665035	-0.753342	-1.03442	-0.897962	-1.12156	-0.813445	-0.889819	0.10161	0.0971349	0.166409	1.17921	-0.298547	-0.568707	1.10135	0.955197	-0.678769	-1.06429	-1.12159	-0.467461	-0.310892	-1.11518
ACAAAGACAGCACACC-1_1	Cancer_HGSOC1	6185	1938	18.7389	NA	NA	1	1	0.255526	Singlet	Tumor	Macrophage	myeloid	0.575363	-0.360573	0.474224	-0.197107	-0.297861	-0.306565	-0.181109	0.234261	-0.125854	0.571037	1.15993	0.74946	-0.565248	-0.210518	-0.10203	0.288949	0.401695	-0.483901	-0.152867	-0.576963	-1.32016	-0.274079	0.573826	0.762337	1.51453	1.02616	-0.524316	-0.0413138	0.407864	2.14993	-0.163129	-0.156463	-0.475905	-0.127504	-0.0241814	-0.177417
ACAAAGACATGACAGG-1_1	Cancer_HGSOC1	1859	1057	7.31576	NA	NA	4	4	0.210433	Singlet	Tumor	T_cells	T	-0.800586	-1.07734	-0.201162	-0.947072	-0.948282	-0.899424	-0.981088	-1.07173	-0.832062	-1.03232	-0.912611	-1.00389	-1.08859	-0.635612	-0.744653	-0.148524	-0.347086	-1.0815	-0.534411	-1.16823	0.0671951	-0.553537	-0.436059	-0.945482	-1.06015	-0.443507	-1.0407	-0.625438	0.436193	-0.493186	-0.39006	-1.09857	-1.1383	-0.811	-0.76569	-1.12857
ACAAAGAGTATCACCA-1_1	Cancer_HGSOC1	7191	2231	12.8355	NA	NA	1	1	0.278515	Singlet	Tumor	Monocyte	myeloid	0.0621404	-0.306834	0.49267	-0.236615	-0.880355	0.325379	0.184101	0.465779	-1.81463	-0.372283	0.276271	0.320223	-0.109382	-0.572471	-0.271336	-0.346674	-0.653983	-0.464701	-0.0661835	-0.579711	1.52776	0.0779487	0.459407	0.026889	0.275012	1.39202	-0.153202	-0.23031	-0.269541	1.4297	0.000384376	-0.0956011	-0.103053	-0.396291	-0.0484645	-0.240849
ACAAAGAGTTATGACC-1_1	Cancer_HGSOC1	2727	1245	15.4382	NA	NA	5	5	0.200707	Singlet	Tumor	NK_cell	CD8T	-0.120756	-1.16876	0.317329	-0.377721	-0.149512	-0.368888	0.218966	-0.756474	-1.41351	-0.209237	-0.350017	-0.470612	-1.02877	-0.888621	-0.150885	-0.182583	-0.490561	-1.13435	-0.648914	-0.993057	2.04318	-0.955354	-1.03523	-0.534107	-0.426001	-0.494765	-1.00234	-1.11348	0.722147	-1.16171	-0.517356	-0.84314	-1.11397	-0.798744	-0.371954	-1.08457
ACAAAGATCGATTCCC-1_1	Cancer_HGSOC1	3337	1569	15.2532	NA	NA	3	3	0.229885	Singlet	Tumor	NK_cell	NK	-0.448834	-0.58183	0.677292	-1.24785	-0.008709	-0.928252	1.12199	-0.952689	-1.11007	-0.487221	-0.691023	0.0676366	-1.15202	-1.12851	-0.197962	-0.346465	-0.437372	-0.790033	-0.373122	-0.509848	-0.0096592	-0.708261	-0.140314	0.107289	-0.0553612	0.120052	0.889241	0.443191	0.939417	0.143427	0.0918515	-0.411254	-0.671833	-0.961939	-0.778309	-0.468643
ACAAAGATCGCGGTAC-1_1	Cancer_HGSOC1	8516	3002	15.1832	NA	NA	1	1	0.289125	Singlet	Tumor	Monocyte	myeloid	-0.479183	-0.25989	1.11752	0.896218	0.684532	0.194341	-0.184142	0.83478	0.0575305	0.201998	1.39419	2.22694	-0.320506	-0.0386761	-0.035976	0.0597757	0.155092	-0.0388981	0.210755	-0.235612	1.28731	0.523609	0.813221	1.35646	1.09389	1.60936	0.528313	0.823776	-0.27484	1.93204	0.590315	0.699233	-0.268439	-0.189554	0.477648	-0.121704
ACAACCAAGACTTCAC-1_1	Cancer_HGSOC1	9562	3024	23.9176	NA	NA	0	0	0.257294	Singlet	Tumor	Epithelial_cells	epithelial	-0.148609	0.450182	-1.26551	0.626453	-0.542861	0.474546	-0.040272	-0.00193139	-0.17875	0.696873	0.21923	-0.336454	0.265603	0.296764	-0.269501	0.707748	0.416371	0.0534872	0.0373559	-0.338437	0.593645	-0.139008	0.16959	-0.410903	-0.704314	-0.86933	-0.431535	-0.723566	-0.834845	-1.86415	0.596185	0.195147	0.332256	1.397	0.0280968	0.0532565
ACAACCAAGGGTTAGC-1_1	Cancer_HGSOC1	4563	1715	19.4828	NA	NA	0	0	0.267905	Singlet	Tumor	Epithelial_cells	epithelial	-1.4377	-0.474418	-1.04922	-0.397846	0.0723409	-0.299425	-1.52504	-0.349183	0.466295	-0.668755	0.347989	-0.861629	-0.431272	-0.488437	0.19572	0.549116	-0.0517979	-0.656133	-0.405928	-0.505689	-0.743416	0.269626	-0.385346	-0.438056	-0.415222	-0.642035	-0.717474	-0.959048	0.496184	-0.628449	-0.979044	-0.605622	-0.466978	-0.365219	0.667937	-0.504879
ACAACCAAGTTGCCTA-1_1	Cancer_HGSOC1	18516	4236	5.9138	NA	NA	1	1	0.244032	Singlet	Tumor	Monocyte	myeloid	0.546892	1.33455	1.06624	0.782746	0.0887367	0.394477	-0.53935	1.08214	-0.55539	0.80502	1.6345	1.7568	0.909292	0.0719347	-0.319254	0.147176	0.38727	1.0392	0.680789	0.129048	0.545815	0.774144	0.99856	1.3224	1.96915	3.22974	0.148323	1.01036	-0.0577089	2.20065	0.738788	0.846943	0.782989	0.531712	0.0182562	0.487598
ACAACCACAACAAGAT-1_1	Cancer_HGSOC1	4327	1808	5.45413	NA	NA	3	3	0.218391	Singlet	Tumor	NK_cell	NK	-1.5284	-0.475639	0.339728	-0.528871	-0.490494	-0.309698	2.19106	0.198308	1.41019	0.207698	-0.324212	0.353631	-0.190995	-0.181278	-0.0311222	-0.6776	-0.356094	-0.224129	-0.043516	-0.838209	-0.745587	-0.200723	-0.522695	0.0698762	-0.602329	-0.340602	-0.814469	-0.424964	0.924994	-0.129091	-0.598868	-0.193022	-0.10023	-0.18471	0.0869791	-0.603828
ACAACCAGTCCTGGGT-1_1	Cancer_HGSOC1	15106	3628	8.85079	NA	NA	1	1	0.297966	Singlet	Tumor	Macrophage	myeloid	1.1521	1.05869	0.931436	0.759553	0.738709	0.604517	0.40747	1.34894	1.90525	1.03364	1.09547	2.5835	0.024173	-0.297524	0.156576	0.437343	0.829049	0.614377	0.216522	1.00932	1.19855	1.53935	2.29427	2.1587	1.92935	2.94029	1.07036	1.49403	-0.737496	2.64708	0.628075	1.07606	0.553644	0.261145	0.0729716	-0.356523
ACAACCAGTGAGATAT-1_1	Cancer_HGSOC1	3609	1519	14.1036	NA	NA	0	0	0.244916	Singlet	Tumor	Epithelial_cells	epithelial	0.126751	-0.587103	-1.22484	-0.287327	0.38262	-0.0188463	0.336876	-0.194896	-1.62108	-0.191507	0.428204	-0.629465	-0.377305	-0.216131	-0.205663	0.205989	-0.271679	-0.844038	-0.522827	-0.243291	-0.26423	-0.506697	-0.309816	-0.931067	-0.303752	-0.172328	-1.21324	-1.17677	0.952149	-0.00541854	-0.556815	-0.229511	-0.865586	-0.0176225	0.219837	-1.01166
ACAACCAGTGTGGACA-1_1	Cancer_HGSOC1	25707	5525	15.0115	NA	NA	1	1	0.333333	Singlet	Tumor	Macrophage	myeloid	-0.00359658	2.03094	1.64955	1.40389	1.32478	1.54739	0.147157	1.6478	-0.537447	1.7966	0.845877	1.53375	1.63003	2.09551	0.166315	0.568813	1.03513	1.55746	1.89243	0.820153	1.55162	1.48861	0.917643	1.67735	2.13349	2.62222	0.407093	1.13365	-1.98681	2.85602	1.58934	1.98727	1.93181	2.67323	0.846158	0.718408
ACAACCAGTTCTCTAT-1_1	Cancer_HGSOC1	17567	4433	20.1287	NA	NA	1	1	0.303271	Singlet	Tumor	Macrophage	myeloid	-0.312372	1.27453	1.77135	1.33007	0.941809	0.849208	0.690274	1.35065	0.356913	1.39564	1.09726	2.47834	1.27055	2.34769	-0.174291	0.319624	0.419975	1.00049	1.98053	0.49066	-0.0129336	0.496705	1.00808	1.54114	1.96946	2.24071	1.23958	1.37194	-0.320629	1.94765	1.36359	0.917933	1.30955	1.73462	0.198439	-0.433153
ACAAGCTAGCAATAAC-1_1	Cancer_HGSOC1	1848	925	20.9416	NA	NA	4	4	0.184792	Singlet	Tumor	T_cells	T	-0.637552	-0.739039	-0.290025	-0.685157	0.688483	-0.950903	0.520489	-1.08482	0.183045	-1.21241	-0.564984	-1.34146	-1.00577	-0.794963	-0.352082	-0.208339	-0.325715	-0.923405	-0.909729	-1.16473	-1.16509	-0.474453	-1.06321	-0.323548	-1.12169	-0.475215	-1.61037	-1.2151	0.873124	-0.254865	-0.6463	-1.44107	-1.21989	-1.01111	-0.0117839	-0.766475
ACAAGCTAGCTGGCCT-1_1	Cancer_HGSOC1	3579	1280	16.7645	NA	NA	2	2	0.191866	Singlet	Tumor	T_cells	CD4T	-0.977121	-0.701954	-0.574017	-0.796068	0.0288114	-0.961986	-0.655518	-0.416975	-0.942412	-1.37024	-0.324953	-1.11101	-1.03552	-0.344918	-0.315668	-0.23451	-0.783033	-0.66021	-0.534535	-0.737233	-0.292025	-0.85606	-0.138313	-1.05319	-0.914751	-0.323985	-1.37227	-1.13063	0.3246	0.251631	-0.961579	-1.0541	-0.726178	-0.311863	-0.260662	0.0956989
ACAAGCTAGTCGGGAT-1_1	Cancer_HGSOC1	14598	4159	18.2765	NA	NA	1	1	0.344828	Singlet	Tumor	Monocyte	myeloid	-0.739337	0.301676	2.05187	1.13201	-0.745651	0.872875	0.704998	1.0407	0.540287	0.934576	1.11472	1.90199	0.258742	0.0770346	0.120439	0.889831	0.490605	0.224605	0.580105	-0.0339467	0.704052	0.973803	0.657438	0.638412	2.7304	2.0567	1.8433	1.76493	-0.890263	3.02726	1.09476	0.687943	0.37883	-0.28843	-0.0443763	0.623253
ACAAGCTCACGACAAG-1_1	Cancer_HGSOC1	4366	1785	5.51993	NA	NA	2	2	0.229001	Singlet	Tumor	NK_cell	CD4T	-1.46338	-0.305698	0.246121	0.243817	0.270924	-0.567534	0.467613	-0.296712	-0.777105	-0.384543	-0.20246	-0.495509	-0.217576	-0.265486	-0.579635	0.0501014	-0.420285	-0.524123	-0.229817	0.362025	-0.534007	-0.25304	0.606795	0.20353	-0.538208	0.0609716	-0.672646	-0.656875	-0.0275928	0.481376	-0.190754	-0.21356	-0.032312	-0.786445	-0.199528	0.264
ACAAGCTCATAGCTGT-1_1	Cancer_HGSOC1	4650	1913	11.7634	NA	NA	1	1	0.282051	Singlet	Tumor	T_cells	myeloid	-1.61063	-0.526795	0.225504	-0.357449	0.135845	-0.749323	-0.240926	-0.0475758	-1.0041	-0.127466	0.238479	0.127726	-0.867577	0.147225	-0.0747385	-0.467134	-0.409937	-0.476816	0.188942	-0.760769	0.310735	0.10594	0.84321	0.0464401	0.689717	0.219437	-0.209408	-0.152488	0.293048	1.17349	-0.150728	-0.389486	-0.727846	-0.59196	0.76105	-0.382921
ACAAGCTGTAGGAAAG-1_1	Cancer_HGSOC1	7516	2793	3.10005	NA	NA	1	1	0.31565	Singlet	Tumor	Monocyte	myeloid	-1.51527	0.783674	0.839551	0.55762	0.196573	0.587247	0.367411	0.752853	-0.0273272	0.49682	1.93824	1.19558	0.458178	0.328272	0.216117	0.201191	0.234228	-0.119655	0.272034	-0.299867	0.459866	-0.0108243	0.570442	1.28091	0.401438	2.27764	-0.133008	0.362001	-0.68785	1.97669	0.322253	0.525749	0.282285	0.216333	0.209496	2.28015
ACAAGCTTCCCGAGGT-1_1	Cancer_HGSOC1	6211	2233	13.9913	NA	NA	3	3	0.162688	Singlet	Tumor	NK_cell	NK	-1.2826	-0.811342	1.42203	0.00739294	-0.495473	0.392751	1.51694	0.123828	-0.070065	0.300085	-0.639747	0.234458	-0.220391	0.232299	-0.407113	-0.63647	-0.217208	-0.359355	-0.0712278	-0.879097	0.710378	-0.405919	-0.0606785	0.342951	0.0605224	0.089297	-0.674641	-0.255798	0.186183	0.93919	0.162843	0.0310112	0.0975327	-0.236303	-0.0361677	-0.648562
ACAAGCTTCCCGTAAA-1_1	Cancer_HGSOC1	2021	872	19.7427	NA	NA	4	4	0.214854	Singlet	Tumor	NK_cell	T	0.00545791	-1.0144	-0.164004	-1.31385	-0.744075	-0.533145	-1.39772	-1.00723	-1.41279	-1.19255	-0.740452	-1.18125	-1.27387	-0.673589	-0.535388	0.0522658	-0.438845	-0.788103	-0.836454	-1.03209	-0.423146	-0.888479	-0.444781	-0.869566	-0.570016	-0.32144	-1.35261	-1.22956	1.17081	-0.182826	-0.296748	-0.838865	-1.24682	-0.993774	-0.518353	-0.48632
ACAAGCTTCCTACCAC-1_1	Cancer_HGSOC1	2835	1222	8.32451	NA	NA	3	3	0.242263	Singlet	Tumor	NK_cell	NK	-0.0663534	-1.12255	0.406439	-0.545905	-0.463882	-0.208787	-0.537911	-0.16814	-0.897576	-0.432553	-0.30987	-0.629271	-0.860587	-0.499303	-0.379913	-0.578176	-0.580853	-0.916254	-0.341544	-0.959326	-0.268041	-1.26213	-0.296702	-0.493698	-0.753991	-0.700645	-0.917977	-0.917406	0.46559	0.600162	-0.248006	-0.668456	-0.793002	-0.779187	-0.481386	-0.0954828
ACAAGCTTCGTAGCCG-1_1	Cancer_HGSOC1	5283	1547	18.304	NA	NA	1	1	0.303271	Singlet	Tumor	Monocyte	myeloid	0.198146	-0.52253	-0.173248	-0.184265	0.139288	-0.264207	-0.144596	-0.441485	0.39851	0.174145	-0.183742	0.292246	-0.947339	-0.763621	-0.534773	0.260178	0.137358	-0.691845	-0.393664	-0.866182	0.0865527	0.16077	-0.19543	-0.0449635	0.0305658	0.926707	-0.755974	-0.284065	1.11543	0.933705	-0.332075	-0.449849	-0.764227	-0.213814	-0.152105	-0.303233
ACACAGTAGAACCGCA-1_1	Cancer_HGSOC1	13506	2244	24.9963	NA	NA	8	8	0.217507	Singlet	Tumor	B_cell	B	-0.289166	-0.347209	-0.731808	-0.123489	-0.47925	-0.182584	-1.87172	0.027319	-0.786407	-0.323431	-1.16508	-1.01336	-0.404901	0.179836	-0.535562	-0.716656	-0.491937	-0.402333	1.21601	0.24428	0.323729	0.21236	-0.564033	-0.850574	-0.563472	0.112944	-0.116959	-0.393439	0.0315964	0.0964852	-0.0805096	0.228343	-0.152733	-0.138751	-0.242927	-0.902926
ACACAGTAGCCATGCC-1_1	Cancer_HGSOC1	7170	2246	14.477	NA	NA	1	1	0.276746	Singlet	Tumor	Macrophage	myeloid	0.735795	-0.480713	0.604556	0.030371	-0.196102	-0.185206	-0.0137392	0.323822	-0.993057	-0.803147	0.556226	0.702465	0.164084	-0.302432	0.00269323	-0.464219	-0.41556	-0.365599	-0.437058	-1.06966	-0.647429	-0.0828512	0.208546	0.00122676	1.53673	1.37763	-0.297657	-0.0125127	0.0385537	1.22784	0.555052	0.0910591	-0.362643	-0.151544	0.307292	0.925794
ACACAGTCACAAAGCG-1_1	Cancer_HGSOC1	20703	5317	10.7279	NA	NA	6	6	0.251105	Singlet	Tumor	Tissue_stem_cells	mesenchymal	2.58845	0.922881	-1.26296	1.3177	1.96423	1.70558	2.08053	1.47692	1.39957	0.901547	1.39013	0.452578	1.03346	0.627496	2.23847	1.06626	0.483422	0.744839	0.723799	1.085	0.953016	0.863516	1.21901	0.853125	0.164137	-0.394407	0.163616	-0.122553	-0.664584	-0.00300587	1.82272	1.03079	1.30719	0.66983	2.60633	1.87705
ACACAGTGTTTGAAAG-1_1	Cancer_HGSOC1	92340	8585	16.0656	NA	NA	0	0	0.302387	Singlet	Tumor	Epithelial_cells	epithelial	0.700544	2.29606	-0.49815	2.35675	1.47936	2.82814	4.1707	2.17992	-0.36067	2.26029	1.99332	2.28931	2.18893	2.08308	0.806038	3.25041	3.29238	1.47884	1.70665	2.2711	2.40899	2.53853	2.24298	1.79009	1.06151	0.629262	0.904238	1.06926	-0.321639	-0.470483	2.71589	1.88814	1.61518	1.86062	2.75561	1.66844
ACACAGTTCACAAGGG-1_1	Cancer_HGSOC1	14618	3953	9.91244	NA	NA	3	3	0.185676	Singlet	Tumor	NK_cell	NK	-0.710812	0.577127	0.98249	0.43465	0.433047	-0.167757	0.282945	0.55966	1.21756	0.728579	-0.385594	0.799051	1.21443	1.86625	-0.777707	-0.127119	0.185357	0.728584	1.74348	0.392992	0.360764	0.670345	0.227155	0.643955	0.570202	-0.277127	-0.102216	0.225154	-1.27679	0.356004	1.38297	1.14081	1.46642	2.13865	0.240698	-0.258464
ACACAGTTCCTGGGTG-1_1	Cancer_HGSOC1	1597	878	13.2749	NA	NA	4	4	0.201592	Singlet	Tumor	T_cells	T	-0.583647	-1.30542	-0.988819	-1.00833	-0.271895	-0.64017	-0.289971	-1.3703	-0.861366	-1.0055	-0.667981	-1.00491	-1.08094	-0.596815	-0.362855	-0.793683	-1.12123	-1.1612	-0.799406	-1.23553	0.106518	-0.684309	-1.08285	-1.13237	-1.22375	-0.483669	-1.17242	-1.22464	1.36033	-0.805581	-0.416381	-1.01709	-1.12741	-0.988225	-0.714143	-1.28044
ACACAGTTCGCAGTCG-1_1	Cancer_HGSOC1	4156	1611	11.9586	NA	NA	2	2	0.191866	Singlet	Tumor	T_cells	CD4T	-1.32836	-0.573358	0.607564	-0.68961	-0.76112	0.0367382	-0.0285024	-0.101981	-0.482721	-0.492111	-0.425956	0.074776	-0.740513	-0.781661	-0.252359	-0.168254	-0.271475	-0.596453	-0.190426	-0.660863	-0.821127	-0.452322	0.00222691	0.423271	0.672518	0.582157	0.579848	0.813099	0.57388	-0.097124	-0.200972	-0.642432	-0.464226	-0.250864	-0.276589	-0.00881343
ACACCAAAGACCAGAC-1_1	Cancer_HGSOC1	110572	9157	22.2425	NA	NA	0	0	0.290009	Singlet	Tumor	Epithelial_cells	epithelial	1.61249	2.51222	-0.317514	2.69264	1.51617	2.59915	2.57853	2.08545	0.863121	2.54218	1.62554	1.94526	2.0466	2.65374	0.349241	3.51066	3.05271	2.01923	3.10585	2.13721	2.53301	2.57119	1.56921	1.21625	1.05929	0.330962	0.981626	1.23569	-1.83717	-0.149901	3.50566	2.29412	1.98561	3.32594	2.29931	1.58758
ACACCAAGTACGAGTG-1_1	Cancer_HGSOC1	3894	1763	6.42013	NA	NA	3	3	0.204244	Singlet	Tumor	NK_cell	NK	0.554747	-0.889422	0.46386	-0.687084	-0.00926442	0.124451	0.851257	-0.422315	0.593168	-0.630133	-0.727654	0.0647664	-0.549525	-0.586334	-0.696682	-0.828857	-0.68188	-0.502959	-0.258962	-0.592865	-0.749088	-0.348812	-0.445866	0.231447	0.709036	0.245867	1.13611	1.28128	0.190839	0.0852548	-0.392615	-0.754099	-0.764722	-0.815443	-0.953353	0.780786
ACACGCGAGTGCAGGT-1_1	Cancer_HGSOC1	4972	1882	7.36122	NA	NA	5	5	0.148541	Singlet	Tumor	NK_cell	CD8T	1.29455	-0.631886	0.888286	-0.347522	0.0107241	-0.257082	-0.0210581	-0.476222	0.101037	-0.850752	-0.933818	-0.29117	-0.62862	0.071119	-0.54754	-0.612596	-0.376676	-0.247916	-0.000248641	-0.844076	0.206995	-0.554377	0.0483802	0.422637	-0.688119	-0.209337	-0.527155	-0.431475	0.328468	1.3936	0.116415	-0.270056	0.24744	0.56384	-0.673453	-0.579251
ACACGCGCAAGATCCT-1_1	Cancer_HGSOC1	4195	1903	13.969	NA	NA	0	0	0.248453	Singlet	Tumor	Epithelial_cells	epithelial	-0.89909	-0.180293	-0.307148	0.388906	0.380451	0.0313418	-1.24089	-0.107991	0.457168	0.426379	0.699449	0.142751	-0.821165	-0.549775	-0.153977	-0.101239	0.0952847	-0.658904	-0.0995072	-0.0581575	1.81485	-0.478173	0.119974	-0.399898	-0.0238868	-0.0297061	-0.118992	-0.115959	1.01673	-0.588699	0.0711067	-0.6402	-0.735411	-0.555228	-0.00946583	-0.605866
ACACGCGCAGTCTACA-1_1	Cancer_HGSOC1	5233	2020	4.50984	NA	NA	3	3	0.158267	Singlet	Tumor	NK_cell	NK	-1.08258	0.0357991	1.22701	0.246343	0.164721	-0.185581	0.616149	0.186377	-1.27153	-0.434615	-0.855457	0.163477	-0.250578	0.0219269	-0.367406	-0.792375	-0.68648	-0.133824	0.0198689	-0.242284	-0.985714	-0.949546	-0.06508	0.764244	0.436328	0.0504025	-0.459137	0.105489	0.684142	-0.341214	-0.340664	-0.0829605	0.0505299	0.120367	-0.567073	-0.79997
ACACGCGTCGGTCGGT-1_1	Cancer_HGSOC1	2636	1135	16.3885	NA	NA	3	3	0.216622	Singlet	Tumor	NK_cell	NK	-0.142831	-0.701075	0.099527	-0.422079	-0.5558	-0.869153	0.699122	-0.111468	-0.33208	-0.878388	-0.496215	-1.04844	-1.17062	-0.998409	-0.213624	-0.428921	-0.55092	-1.13555	-0.64582	-0.725373	0.725213	-1.21479	-0.484748	0.384355	-0.0503797	0.232469	-0.806205	-0.75593	1.06862	0.675617	-0.0608563	-0.571724	-0.782972	-1.21224	-0.424468	-0.791359
ACACTGAAGTACGTCT-1_1	Cancer_HGSOC1	13710	4151	13.2969	NA	NA	6	6	0.240495	Singlet	Tumor	Fibroblasts	mesenchymal	-1.70343	0.718597	-1.06122	0.559043	1.38623	1.51618	0.227104	1.04317	1.32505	0.124702	1.44229	0.482843	0.13344	0.0516662	2.26467	-0.0383473	-0.42846	0.848194	0.0429278	-0.0790003	0.382515	0.0825218	0.519664	0.656537	-0.436875	-0.71411	1.26095	0.692422	-1.00394	0.710774	0.916794	0.719399	0.80839	0.472953	2.40803	-0.469287
ACACTGAAGTGCACCC-1_1	Cancer_HGSOC1	6165	2088	12.9765	NA	NA	3	3	0.167109	Singlet	Tumor	NK_cell	NK	0.020816	-0.240047	0.850576	-0.327733	-0.304297	-0.160352	0.105158	0.115905	1.27066	0.0787241	-0.585054	0.134863	0.0251165	-0.0080159	-0.343899	-0.68251	-0.0332363	-0.108774	0.451626	-0.283698	-0.499327	0.10319	-0.114788	-0.161042	0.0827329	-0.230865	-0.945635	-0.482953	0.0455966	0.437822	-0.130192	-0.109325	-0.109433	-0.131697	-0.214563	-0.480537
ACACTGACAACCAGAG-1_1	Cancer_HGSOC1	5276	1608	21.8158	NA	NA	1	1	0.317418	Singlet	Tumor	Monocyte	myeloid	-1.3241	-0.913426	0.31513	-0.00481444	-0.404221	-1.31643	-0.610126	-0.178677	0.417821	-0.236679	0.516083	-0.516764	-0.778232	-0.119638	-0.309853	0.218527	-0.177203	-0.842876	0.112456	-1.27445	-0.985621	-0.557995	-0.0551172	0.147742	1.17832	1.00093	-1.14526	-0.519169	0.103131	1.5254	-0.417251	-0.469344	-0.525021	-0.368208	0.333403	0.16079
ACACTGACACATGTTG-1_1	Cancer_HGSOC1	2415	1122	12.0497	NA	NA	4	4	0.175066	Singlet	Tumor	T_cells	T	-0.533081	-1.08064	-0.40833	-1.04676	-0.183619	-0.549127	-0.459987	-1.02226	-0.606842	-1.01968	-0.327677	-1.20072	-0.969686	-0.679277	-0.411037	-0.793305	-0.512931	-0.81604	-0.854096	-0.5245	-0.977606	-0.573784	-0.689847	-0.740267	-0.317675	-0.727637	-1.42503	-1.42969	0.805716	-0.0476004	-0.752841	-0.807526	-0.844645	-1.08788	-0.419998	-0.229846
ACACTGACATGAGGGT-1_1	Cancer_HGSOC1	566	357	21.5548	NA	NA	4	4	0.212202	Singlet	Tumor	NK_cell	T	0.730856	-1.41894	-1.20896	-1.26535	-0.602149	-1.34093	-0.503754	-1.49832	-0.472776	-0.853948	-0.704276	-1.42923	-1.37435	-1.06575	-0.645072	-0.856356	-1.03816	-1.33117	-1.17286	-1.15857	-0.882394	-0.879226	-1.51962	-1.50243	-1.04863	-0.958556	-1.55882	-1.48158	1.14814	-0.292075	-0.869836	-1.42586	-1.78062	-0.8411	-0.595048	-0.716213
ACACTGACATGTTTGG-1_1	Cancer_HGSOC1	2422	1201	12.2626	NA	NA	4	4	0.207781	Singlet	Tumor	T_cells	T	-0.947275	-1.28551	-0.684756	-1.167	-1.01929	-0.82743	0.596272	-1.08302	-0.88694	-0.181398	-0.588886	-1.38913	-0.98879	-0.223312	-0.389208	-0.548694	-0.850541	-0.887767	-0.507092	-1.0938	0.529166	-0.528776	-0.401744	-0.755944	-1.17952	-0.264035	-1.59435	-1.28089	0.907873	-0.397449	-0.538398	-1.00118	-1.08994	-0.366344	-0.0203573	-1.1884
ACACTGAGTAGGACTG-1_1	Cancer_HGSOC1	5015	1807	16.2114	NA	NA	3	3	0.174182	Singlet	Tumor	NK_cell	NK	-0.241638	-0.521226	1.31885	-0.729837	-0.204517	-0.320146	-1.23215	0.0521354	0.998424	-0.604867	-0.348121	0.90245	-0.537972	-0.344039	-0.327422	-0.476315	-0.152503	-0.204604	-0.313142	-0.199767	0.524827	0.0152428	0.297119	0.649976	0.594838	0.645092	-0.0301188	0.34292	0.30791	1.04786	-0.219149	0.220364	-0.191026	-0.190466	-0.202579	-1.42707
ACACTGAGTCATCCCT-1_1	Cancer_HGSOC1	3702	1564	9.96759	NA	NA	0	0	0.231653	Singlet	Tumor	Epithelial_cells	epithelial	-0.457753	-0.739565	-0.936774	-0.550303	0.87296	-0.215728	1.02325	-0.362694	-0.656874	0.154249	0.338289	-1.29701	-0.768414	-0.252842	-0.145792	0.247703	-0.393167	-0.862937	-0.651768	-1.029	1.28281	-0.15082	-0.800856	-1.25826	-0.741842	-0.493785	-1.25353	-0.859882	0.631213	-0.737296	-0.307368	-0.69601	-0.928301	0.199067	-0.246104	0.208644
ACACTGAGTGAACCGA-1_1	Cancer_HGSOC1	8721	2790	13.737	NA	NA	1	1	0.289125	Singlet	Tumor	Macrophage	myeloid	0.457921	0.790417	0.961975	0.579706	-0.141197	-0.0328725	-0.280932	0.769766	-0.655709	-0.334113	0.721474	1.51258	-0.0778403	-0.283776	-0.188077	0.0155739	0.102227	0.34258	0.0279466	-0.221757	0.808995	0.874086	0.300806	0.0542504	1.94708	2.28622	0.71073	0.372906	-0.158153	0.666311	0.438706	0.464385	0.197598	0.163534	0.0904845	0.421558
ACACTGATCAGATTGC-1_1	Cancer_HGSOC1	3888	1437	0.488683	NA	NA	0	0	0.233422	Singlet	Tumor	Epithelial_cells	epithelial	-0.11379	0.0716363	-1.44784	-0.634883	0.00677884	-0.724294	-0.963579	-0.835254	0.558702	-0.616062	-0.379024	-1.50022	-0.615404	-0.305422	-0.695913	0.341458	0.497437	0.0718048	-0.713483	0.350701	-0.843616	-0.381205	-0.596977	-2.04566	-0.990474	-1.11942	-1.08365	-1.18284	0.56153	-0.874443	-0.54524	-0.577258	-0.142708	-0.266012	-0.111225	-1.0963
ACACTGATCGTGAGAG-1_1	Cancer_HGSOC1	43858	6476	16.957	NA	NA	0	0	0.305924	Singlet	Tumor	Epithelial_cells	epithelial	-0.390399	2.15022	-0.787646	1.96359	1.53636	2.45018	3.10908	1.72187	-0.182169	3.03055	1.7772	1.61785	1.88508	2.29035	0.611316	3.00579	2.90022	1.66495	2.71008	2.1239	2.38042	1.46627	2.02754	1.62673	0.446824	-0.0850206	0.229255	0.546431	-0.308719	0.0494937	2.72289	2.34966	1.63861	2.21468	2.20746	1.71864
ACAGAAAAGCTTTGTG-1_1	Cancer_HGSOC1	5975	2030	8.03347	NA	NA	3	3	0.268789	Singlet	Tumor	NK_cell	NK	0.243624	-0.134797	0.45648	-0.104482	-1.27403	-0.611246	-0.350274	0.253714	0.354008	-0.0314401	-0.511741	0.526652	-0.0598102	-0.162273	-0.506369	-0.355579	0.0414309	-0.318805	-0.667958	-0.806765	-1.05548	-0.595402	-0.169269	0.337275	1.19389	0.553139	0.729004	1.13293	0.493199	0.61679	-0.414555	-0.360893	0.0560144	-0.388142	-0.694333	-0.0135135
ACAGAAAAGTCTTCCC-1_1	Cancer_HGSOC1	11107	3427	10.786	NA	NA	5	5	0.339523	Singlet	Tumor	T_cells	CD8T	1.37442	0.609647	1.86271	0.0887744	1.89518	0.776073	1.87888	1.19086	-0.711355	0.0169616	0.232879	2.09609	0.0825828	-0.0366573	0.336364	0.561157	0.748026	0.206624	0.586074	0.445845	0.638831	1.05253	1.82148	2.53198	1.09089	2.6964	-0.234735	0.842064	-0.447569	1.26378	0.619138	1.00432	0.168143	0.0184141	0.865498	0.470671
ACAGAAACAACCGCTG-1_1	Cancer_HGSOC1	23397	4803	4.65872	NA	NA	1	1	0.285588	Singlet	Tumor	Monocyte	myeloid	-0.701222	1.68481	2.08013	1.63122	0.56073	1.35698	0.735055	1.7896	-0.523306	1.10564	1.77568	2.97344	0.489208	0.585928	-0.0502657	0.409621	0.65528	1.79011	0.687651	0.441343	1.65548	1.81973	1.54842	1.85452	3.02908	2.43105	1.387	2.09935	-1.81792	2.07164	0.952298	1.16722	0.993053	0.220568	0.227345	-0.157701
ACAGAAACACATTGTG-1_1	Cancer_HGSOC1	10060	2709	11.0338	NA	NA	1	1	0.237843	Singlet	Tumor	Macrophage	myeloid	1.10116	0.431285	0.862268	0.215201	0.310352	-0.0797694	-0.377615	0.725003	-0.831265	0.169215	1.14119	1.47209	-0.215123	-0.154705	-0.130362	0.462374	0.0381652	-0.337338	-0.194772	-0.0200204	1.13917	0.149169	0.757806	0.654777	0.927089	1.22111	0.00110348	0.561133	-0.0280391	1.71565	0.0180032	0.0495149	0.112501	-0.192522	0.37999	1.09114
ACAGAAACATCATCCC-1_1	Cancer_HGSOC1	3688	1643	15.6725	NA	NA	4	4	0.198939	Singlet	Tumor	T_cells	T	0.247703	-0.750498	0.640046	-0.72511	-0.810577	-0.970498	-0.9163	-0.636952	-0.776192	-0.0500408	-0.751833	-0.523829	-0.596131	-0.468821	-0.311274	-0.177463	-0.8108	-1.16064	-0.161744	-0.640011	-0.783922	-0.268096	0.0432791	-0.132527	0.548059	-0.0956129	-0.446839	-0.304538	0.422779	-0.137992	-0.133802	-0.297992	-0.900652	-0.594423	-0.804331	-1.68297
ACAGAAATCATGGTAC-1_1	Cancer_HGSOC1	5038	1765	24.8313	NA	NA	1	1	0.318302	Singlet	Tumor	Macrophage	myeloid	-0.704432	-0.525367	-0.247826	-0.547522	-0.342129	-0.935492	-0.136629	-0.996629	-1.84058	-0.626448	0.535774	-0.410396	-0.514462	-0.509914	-0.323265	0.172987	-0.197014	-0.674196	-0.238952	-0.760409	-0.797725	-0.481785	-0.711095	-0.493232	0.134911	1.0806	-1.03386	-0.440133	0.800241	1.19693	-0.563343	-0.820539	-1.04456	-0.47636	-0.489542	0.428595
ACAGAAATCGTGCACG-1_1	Cancer_HGSOC1	4206	1711	5.68236	NA	NA	3	3	0.17153	Singlet	Tumor	NK_cell	NK	-0.0950938	-0.84919	0.808104	-0.112188	-0.720275	0.00936933	0.171662	-0.626361	-0.0925129	-0.666708	-1.17858	-0.433772	-0.0672556	-0.587628	-0.739774	-0.36994	-0.489845	-0.373613	-0.593722	-0.729137	-0.127372	-0.165433	-0.93496	0.00442774	0.243079	-0.368244	-0.655772	-0.569585	0.148952	-0.344394	0.120247	-0.561302	-0.61219	-0.407968	-0.933375	-0.293588
ACAGAAATCTCACTCG-1_1	Cancer_HGSOC1	12303	3558	15.2321	NA	NA	0	0	0.304156	Singlet	Tumor	Epithelial_cells	epithelial	0.345701	-0.0327771	-0.480236	0.48567	-0.317194	0.75046	1.24437	0.654045	0.0737897	0.580101	0.102852	-0.249242	-0.162167	-0.182485	-0.553632	2.19056	0.883844	-0.311705	0.242341	-0.568899	1.38293	0.925559	0.134065	-0.121624	-0.44864	0.083298	0.808839	0.698014	0.937121	-0.537015	0.794606	-0.0202093	-0.0090566	0.320568	2.12751	0.68592
ACAGCCGAGGCCTAAG-1_1	Cancer_HGSOC1	3769	1480	13.5314	NA	NA	3	3	0.222812	Singlet	Tumor	NK_cell	NK	0.124505	-0.849218	0.297174	-0.531333	-0.402824	-0.574502	1.57122	-0.674373	0.704499	-0.00180519	-0.391661	0.0233221	-0.846579	-0.867293	-0.591154	-0.708694	-0.539679	-0.678861	-0.363746	-0.497269	-0.762864	-0.992791	-0.062682	-0.585446	-0.198271	-0.43933	-0.987623	-0.510401	1.01316	0.2734	-0.43849	-0.648908	-0.741856	-0.686472	-0.100657	0.0184584
ACAGCCGGTAGTAAGT-1_1	Cancer_HGSOC1	3840	1612	5.91146	NA	NA	5	5	0.22458	Singlet	Tumor	T_cells	CD8T	0.011058	-0.279626	0.116875	-0.215775	-0.657605	-0.342312	-0.95235	-0.567536	0.0928224	-0.873014	-0.837046	-0.775069	-0.593678	-0.627513	-0.118122	-0.431837	-0.675372	-0.399285	-0.413666	-0.714449	-0.773987	-0.410764	-0.931253	-0.754269	0.0065397	-0.673022	-1.05839	-0.724223	-0.415384	-0.221836	-0.480807	-0.0923321	-0.155499	-0.268194	-0.549104	-1.28147
ACAGCCGGTATACCTG-1_1	Cancer_HGSOC1	31944	5456	12.5877	NA	NA	1	1	0.290009	Singlet	Tumor	DC	myeloid	-0.7794	1.99924	0.508799	1.92644	-1.05137	0.634111	-0.0987984	1.83213	0.650404	1.71769	0.863608	1.39593	1.90741	1.3831	-0.298378	0.905283	1.0809	1.97526	1.85461	0.563281	1.56248	2.12314	0.770766	2.087	1.28291	1.57353	0.351703	0.371114	-1.96607	1.22514	2.04623	1.76669	1.58628	1.1892	0.275946	-0.288518
ACAGCCGGTCCGACGT-1_1	Cancer_HGSOC1	3712	1438	24.0571	NA	NA	4	4	0.190981	Singlet	Tumor	NK_cell	T	0.254109	-1.15069	-0.266085	-0.844381	0.272207	-0.499997	-0.175285	-1.09555	-0.618503	-0.605776	-0.232521	-0.659913	-0.810234	-0.241051	-0.875582	-0.692168	-0.751117	-0.927052	-0.661201	-0.763016	-1.04722	-0.813451	-0.270305	-0.370892	-0.476027	-0.0850701	-1.58553	-1.06168	-0.132356	0.704486	-0.598046	-0.938892	-0.839354	-0.72309	-0.820787	-0.719022
ACAGCCGTCAAGTCTG-1_1	Cancer_HGSOC1	2543	1066	0.668502	NA	NA	0	0	0.328912	Singlet	Tumor	Epithelial_cells	epithelial	0.0124257	-0.22392	-0.779812	-0.689387	-0.118434	-0.734112	-0.336658	-0.603975	0.491684	0.187363	-0.0788169	-0.60917	-0.67083	-0.913692	-0.347183	-0.401334	-0.0842714	-0.468557	-1.02758	-0.0522821	-0.036502	-0.41589	-0.596137	-1.26717	-0.664927	-0.333275	-0.801018	-1.25358	1.02911	-0.864526	-1.28485	-0.545415	-0.505625	-0.499834	-0.437886	-0.451419
ACAGCCGTCCGGACGT-1_1	Cancer_HGSOC1	4592	1825	4.02875	NA	NA	3	3	0.204244	Singlet	Tumor	NK_cell	NK	0.325438	-0.638791	0.844401	-0.773224	-0.66645	-0.409653	-1.11094	-0.277265	-0.460591	-0.531212	-0.731716	0.297775	-0.410992	0.114844	-0.277557	-0.516723	-0.596434	0.0868527	0.21096	-0.785994	1.00244	0.111391	-0.702675	0.0943418	0.199984	0.254113	0.0627481	-0.0485595	-0.327296	-0.115511	-0.356839	-0.200718	-0.088594	-0.641014	-0.678035	-0.519523
ACAGGGACAACAGAGC-1_1	Cancer_HGSOC1	5523	1817	5.16024	NA	NA	2	2	0.233422	Singlet	Tumor	T_cells	CD4T	-0.651958	-0.0992035	-0.242217	-0.444517	-1.14275	-0.0447627	-1.35304	-0.780046	-0.975287	-0.743677	-0.627653	-0.290334	-0.231707	-0.280914	-0.350173	-0.371644	-0.74732	-0.668556	-0.164325	-0.922782	-0.909713	0.0481519	-0.671115	-0.550492	-0.809275	-0.330833	-0.734659	-0.847428	0.251487	-0.314772	-0.473718	-0.463113	0.0112778	-0.465197	-0.935282	-0.746793
ACAGGGAGTACGCTTA-1_1	Cancer_HGSOC1	4396	1407	12.9891	NA	NA	12	12	0.230769	Singlet	Tumor	B_cell	B	1.91198	-0.930186	-0.0892538	-0.534079	-1.11081	-0.152447	-1.35791	-0.497987	-0.773216	-0.239197	-0.529111	-0.784337	-0.673909	-0.612601	-0.431539	-0.782206	-0.820037	-0.742657	-0.808347	-1.03004	-0.671755	-1.08794	-0.786209	-0.498944	-0.409725	-0.518581	-0.878876	-0.673007	0.438428	-0.1347	-0.642184	-0.671608	-0.56394	-0.125599	0.319688	-0.589861
ACAGGGATCCTCGATC-1_1	Cancer_HGSOC1	7993	2727	8.73264	NA	NA	1	1	0.239611	Singlet	Tumor	Macrophage	myeloid	-0.192405	-0.231796	0.963378	0.877532	-0.257857	-0.0341821	-1.02551	0.403879	0.324502	0.615739	0.973038	1.5779	0.419155	-0.319293	-0.148757	-0.390218	-0.272656	-0.0207769	-0.119255	-0.520698	-0.296773	0.351319	-0.389936	0.44655	1.23934	2.28769	0.378469	0.45315	1.17673	1.32897	0.235112	0.333332	0.119416	-0.203942	0.601474	0.635894
ACAGGGATCTGGACCG-1_1	Cancer_HGSOC1	19299	5376	9.11446	NA	NA	6	6	0.229001	Singlet	Tumor	Tissue_stem_cells	mesenchymal	1.60626	1.04926	-0.793242	0.742477	2.36639	2.23711	1.1723	1.08882	3.22268	0.453108	1.70821	0.403112	0.482791	0.328269	2.55049	0.525146	0.191411	1.0493	0.537551	0.983341	1.66931	0.849359	1.08812	0.255753	-0.443459	-1.41399	0.202248	-0.184406	-0.717596	0.412882	1.76331	0.599923	1.04732	0.483347	2.76064	1.39822
ACATCCCAGAATCGAT-1_1	Cancer_HGSOC1	14504	4620	8.71484	NA	NA	11	11	0.229885	Singlet	Tumor	Endothelial_cells	endothelial	-0.267266	0.582532	-0.78606	0.97092	3.33663	2.60844	1.06908	0.468207	-0.32159	1.10659	1.69634	0.684171	0.725505	-0.159567	1.25635	0.514944	0.256282	-0.428143	0.762414	-0.203525	2.48897	1.92691	0.0688437	-0.0382147	0.38913	0.702479	0.473862	0.135161	-0.0195524	0.954365	1.99576	-0.592731	0.151823	-0.796295	1.76986	-0.3716
ACATCCCAGCAGGCTA-1_1	Cancer_HGSOC1	3897	1696	8.03182	NA	NA	9	9	0.205128	Singlet	Tumor	NK_cell	CD8T	0.399384	-0.969506	0.522681	-0.184416	-0.615392	-0.556328	0.0147869	0.5637	0.497201	0.0419191	-0.954486	0.140544	-0.314838	-0.197919	-0.461555	-0.119742	-0.115392	-0.788475	-0.0185322	-0.788093	-0.98575	-0.0308521	-0.26295	0.763159	1.04633	-0.0449576	1.72161	1.38448	0.352938	-0.3532	-0.260548	-1.02758	-0.609139	-0.256155	-0.664778	-1.71579
ACATCCCAGGGCCCTT-1_1	Cancer_HGSOC1	37909	5644	10.2087	NA	NA	8	8	0.334218	Singlet	Tumor	Epithelial_cells	B	3.16531	1.79371	0.0422622	2.11168	0.980762	2.57257	1.72383	1.62466	-0.0904622	1.71243	1.81006	2.00054	0.872755	0.14932	0.277731	2.40447	2.52993	1.01651	0.541386	1.88673	2.68876	2.09803	1.52486	1.87173	1.15347	1.14899	0.507363	0.77336	-0.716041	1.30306	2.24524	1.54298	0.707743	0.360908	2.2529	1.791
ACATCCCCAGTTGGTT-1_1	Cancer_HGSOC1	85921	8457	24.6703	NA	NA	0	0	0.307692	Singlet	Tumor	Epithelial_cells	epithelial	1.24144	2.24694	0.343768	2.66192	1.82366	2.65028	1.26171	2.16805	0.882532	2.95149	1.3717	1.73877	1.29557	1.135	0.960489	3.686	3.09977	1.53606	1.96504	1.8777	2.89484	2.31509	1.97306	2.77924	2.17871	1.35464	0.949161	1.16274	-0.0823524	1.33393	2.84663	2.09985	1.46341	2.36396	2.38333	1.98948
ACATCCCGTACAAACA-1_1	Cancer_HGSOC1	14869	3923	10.9624	NA	NA	1	1	0.251989	Singlet	Tumor	Monocyte	myeloid	-0.650053	0.682965	1.6184	0.210651	-0.1408	0.452694	0.298274	1.24698	-0.764851	1.49097	1.23635	2.05638	0.0202004	-0.111143	-0.00264102	0.268714	0.345309	0.114267	0.23751	0.557707	0.785364	0.246473	0.953457	1.47023	1.61263	2.83367	-0.243962	0.589798	-0.74827	2.05915	0.752665	0.621971	0.147249	0.107432	0.0732745	-0.0815404
ACATCCCGTACAAGCG-1_1	Cancer_HGSOC1	8470	1412	5.02952	NA	NA	10	10	0.218391	Singlet	Tumor	B_cell	B	-0.415516	-1.05687	-0.556531	-0.47339	-0.497182	-0.901813	-0.329362	-0.94379	-0.124639	-0.832683	-0.308808	-1.17652	-0.821159	-0.655901	-0.502717	-0.744011	-0.413269	-1.13183	-0.666652	-1.028	0.342215	-0.211272	-0.598689	-0.648906	-1.24054	-0.764525	-1.27382	-0.901342	0.75002	-0.266193	-0.499232	-0.65243	-0.654649	-0.557548	-0.611406	-0.289399
ACATCCCGTTCTTCAT-1_1	Cancer_HGSOC1	3937	1942	3.65761	NA	NA	5	5	0.220159	Singlet	Tumor	T_cells	CD8T	-0.726306	-0.687269	0.839357	-0.544126	-0.402592	-0.0659879	-0.0790643	-0.806023	-0.294671	-0.521529	-0.457458	0.0760512	-0.687164	-0.236541	-0.524382	-0.737485	-0.559075	-1.04238	0.0891855	-0.769391	-0.462843	0.336688	-1.03675	-0.15089	-0.36364	0.0280822	0.051162	-0.296085	0.247571	0.0687188	0.163973	-0.417406	-0.472942	-0.837489	-0.507553	-1.57013
ACATCCCTCTTGGAAC-1_1	Cancer_HGSOC1	8542	2685	7.82018	NA	NA	2	2	0.217507	Singlet	Tumor	T_cells	CD4T	0.854193	0.287613	1.55643	-0.54732	-0.543019	-0.16135	0.716227	0.70576	-1.56649	-0.0773125	-0.929051	0.193608	-0.209902	0.174788	-0.485193	0.286355	-0.287043	0.0208679	0.363595	-0.163589	-1.30024	0.1887	0.558369	1.19032	0.665608	-0.132909	0.700304	0.54608	-0.465599	0.256255	0.130914	0.502846	0.688347	0.703577	-0.481444	0.0361931
ACATCGACAGAGGCAT-1_1	Cancer_HGSOC1	2283	1070	15.9001	NA	NA	3	3	0.22458	Singlet	Tumor	NK_cell	NK	-0.763837	-1.08144	0.740683	-0.721648	-0.806378	-0.66954	0.420825	-0.888704	-1.53703	-0.848384	-0.785507	-0.430402	-0.695419	-0.551212	-0.256487	-0.727721	-0.832585	-0.953213	-0.665412	-0.870261	0.0761053	-0.765442	-0.847005	-1.10292	-0.307016	-0.330794	-1.56515	-1.23286	0.879003	-0.567764	-0.611599	-1.27314	-0.94998	-0.847046	-0.729122	-1.11313
ACATCGACAGCTCGGT-1_1	Cancer_HGSOC1	3779	1636	5.79518	NA	NA	3	3	0.150309	Singlet	Tumor	NK_cell	NK	-1.34887	-0.588499	0.78351	-0.185372	-0.661156	-0.299965	-0.176442	-0.57997	-1.18206	-0.426768	-0.550413	0.12509	-0.522216	-0.668689	-0.348473	-0.323396	-0.286852	0.030073	-0.689474	-0.505762	-0.402631	-0.299251	-0.092078	0.487284	0.215182	-0.427832	-0.706433	-0.50852	0.75552	0.444492	-0.488599	-0.482113	-0.519112	-0.848899	-0.460986	-0.704576
ACATCGACAGTTTGGT-1_1	Cancer_HGSOC1	7068	2214	19.1143	NA	NA	1	1	0.335102	Singlet	Tumor	Macrophage	myeloid	1.0459	-0.321886	0.296252	0.244672	0.835299	-0.33367	-0.98964	0.345774	0.0779445	-0.00810974	1.32105	0.438757	0.0946499	-0.401618	-0.291915	-0.356569	-0.255379	-0.670638	-0.464751	-0.980081	1.62566	0.0447655	0.222322	0.257654	0.670107	0.803479	-0.727031	-0.14478	0.193592	2.5059	0.392369	-0.0307199	-0.405287	-0.727066	0.31595	-0.290436
ACATCGACATTCTGTT-1_1	Cancer_HGSOC1	6660	2319	13.2432	NA	NA	1	1	0.290893	Singlet	Tumor	Monocyte	myeloid	-1.04118	-0.258903	0.222532	0.169138	0.287101	-0.0272197	-1.10658	0.0876095	-1.06624	-0.457452	0.48906	0.241961	-0.373294	-0.363586	-0.545142	0.182549	-0.191812	-0.51219	0.0412787	-0.701362	0.866511	-0.334737	-0.214422	0.0446335	-0.0817443	0.321534	-0.383388	-0.234409	0.165929	1.79729	0.278439	-0.63778	-0.330312	-0.36916	-0.265306	0.0562489
ACATCGAGTCATGACT-1_1	Cancer_HGSOC1	4886	1833	21.3058	NA	NA	1	1	0.334218	Singlet	Tumor	Monocyte	myeloid	-0.670173	-0.68091	0.673072	-0.521902	-0.118244	-0.177559	-0.0878146	-0.653135	1.00752	-0.589657	0.118374	-0.15525	-0.627847	-0.453305	-0.488381	-0.592182	-0.635855	-0.863459	-0.256995	-0.566945	-0.190629	0.00515812	-0.405315	-0.159413	0.120965	0.382794	-0.691185	-0.420705	-0.0947654	-0.119097	-0.209285	-0.827132	-0.791549	-1.02001	-0.44486	-0.499707
ACATCGAGTGGATCGA-1_1	Cancer_HGSOC1	5779	1675	5.03547	NA	NA	2	2	0.221043	Singlet	Tumor	T_cells	CD4T	-0.702373	-0.375037	0.10211	-0.0954606	-0.881991	-0.0956766	-0.565773	-0.599836	0.274786	-0.231332	-0.804765	-0.393758	-0.458048	-0.454152	-0.375774	-0.525307	-0.587231	-0.386012	-0.53111	-0.745561	0.68527	-0.609846	-0.853105	-0.924339	0.204396	-0.202704	0.408907	0.286103	-0.0705867	-1.06603	-0.584548	-0.911391	-0.186549	-0.321182	-0.36344	-1.1225
ACATCGATCCTATGGA-1_1	Cancer_HGSOC1	3531	1493	10.1105	NA	NA	0	0	0.248453	Singlet	Tumor	Epithelial_cells	epithelial	1.01661	-0.744644	-0.707714	-0.207836	1.00325	0.385096	-0.257665	-0.760516	-1.38672	-0.159621	0.095093	-1.22234	-0.80892	-0.455295	0.170866	0.183869	0.0404847	-0.856276	-0.34149	-0.749747	0.773702	-0.0964446	-0.455075	-0.7291	-0.548944	-0.398471	-1.3388	-0.961206	1.00105	-0.482603	0.0860484	-0.377065	-0.667125	0.123253	0.650246	0.415908
ACATGCAAGAAACTAC-1_1	Cancer_HGSOC1	33298	6443	17.3494	NA	NA	0	0	0.295314	Singlet	Tumor	Epithelial_cells	epithelial	0.0210932	2.08511	-0.0706176	1.79117	1.16704	2.52003	3.63726	2.06032	0.3326	1.54619	2.12741	1.70718	0.886508	0.831911	0.517497	3.80468	3.3077	1.23657	1.03204	1.88702	3.51544	2.30172	2.005	0.672441	0.562959	0.744399	-0.0446587	0.598805	-0.0892291	0.333063	1.80288	1.60711	1.21395	2.13132	2.29343	2.52605
ACATGCAAGACCTTTG-1_1	Cancer_HGSOC1	5949	2247	8.23668	NA	NA	3	3	0.16092	Singlet	Tumor	NK_cell	NK	0.111327	-0.00624481	1.05512	-0.657715	-0.68368	-0.321598	1.16204	0.122375	0.520243	-0.0879681	-0.0547551	0.799705	-0.253349	-0.125379	-0.0712898	-0.652104	-0.149279	0.129536	-0.315685	0.13459	-0.262585	-0.246488	0.78702	0.684116	0.745857	-0.0975656	-0.699341	-0.1278	0.198031	1.06279	0.284383	0.610446	-0.172827	-0.599106	-0.723155	-0.394237
ACATGCAAGCCAAGTG-1_1	Cancer_HGSOC1	2751	1149	11.0505	NA	NA	2	2	0.20336	Singlet	Tumor	T_cells	CD4T	-0.165369	-0.925486	-0.0768145	-1.21281	-0.242825	-1.06719	0.284635	-0.452877	-0.587709	-0.475146	-0.74701	-1.37883	-1.25313	-0.779772	-0.522904	-0.695691	-0.809867	-0.791227	-0.596204	-1.07462	-0.565692	-0.587854	-0.355199	-0.753661	-0.625501	-0.315235	-1.54014	-1.1767	1.06243	0.435659	-0.857475	-0.926207	-0.690746	-0.748043	-0.761385	-0.38762
ACATGCAAGCCTCAGC-1_1	Cancer_HGSOC1	924	672	1.08225	NA	NA	0	0	0.260831	Singlet	Tumor	DC	epithelial	1.18444	-0.795663	-1.05997	-0.302394	-0.0945596	-0.607577	-0.42178	-1.00183	0.0670055	-0.458997	0.327685	-1.346	-1.01742	-0.753298	-0.344961	-0.137246	-0.233531	-0.647159	-0.617317	-0.350904	-1.01253	-0.816029	-1.16718	-1.47009	-0.766672	-0.821687	-1.48711	-1.5787	1.00116	-0.786963	-1.12538	-0.554896	-0.720518	-0.671861	-0.378243	-0.486309
ACATGCAAGGATACCG-1_1	Cancer_HGSOC1	1544	987	4.98705	NA	NA	4	4	0.208665	Singlet	Tumor	NK_cell	T	0.949317	-1.26838	-0.422238	-1.36066	-0.45454	-0.83047	1.09837	-1.55864	-0.015298	-0.633991	-0.909045	-0.683284	-1.17357	-0.629515	-0.687017	-0.935695	-1.08266	-1.26023	-0.4624	-1.24156	-0.573557	-0.797549	-1.08067	-1.06374	-0.175104	-0.553664	-1.51182	-1.10707	0.743015	0.235722	-0.485094	-1.01645	-0.993796	-0.431456	-0.456472	-1.21974
ACATGCACAATCTGCA-1_1	Cancer_HGSOC1	14557	3589	8.83424	NA	NA	8	8	0.249337	Singlet	Tumor	NK_cell	B	-1.75932	0.0257859	1.92282	1.36558	0.119697	-0.267856	2.64669	0.547846	0.00134127	-0.318623	-0.925414	-0.0847034	0.319586	-0.0557419	-0.386347	-0.568488	-0.658575	-0.2629	0.224565	-0.460545	0.741115	0.398828	0.446582	1.24727	1.02407	0.668456	0.255388	0.780898	-0.902964	0.849752	0.402167	0.464371	0.362322	0.211727	-0.57178	-0.166643
ACATGCACAATTCACG-1_1	Cancer_HGSOC1	4843	1653	10.3242	NA	NA	2	2	0.211317	Singlet	Tumor	T_cells	CD4T	-0.644948	-1.14325	-0.144095	-0.549463	-0.770784	-0.00518533	-0.528833	-0.537378	-0.475449	-0.696336	-0.719423	-0.4148	-0.65096	-0.375209	-0.303912	-0.54602	-0.76996	-0.735651	-0.443633	-0.563706	-0.857921	-0.616924	-0.262751	-0.287999	-0.862262	0.282749	-0.336615	-0.431615	0.156884	0.0687226	-0.440962	-0.932933	-0.410151	-0.345449	-0.677545	-0.766144
ACATGCACAGGAGGAG-1_1	Cancer_HGSOC1	4070	1523	12.8501	NA	NA	1	1	0.274978	Singlet	Tumor	Monocyte	myeloid	0.546022	-0.925482	-0.0786043	-0.267106	-0.179449	-0.277539	-1.76463	-0.654185	0.368447	-0.244206	0.762442	0.397917	-1.13817	-0.867972	-0.417686	-0.529164	-0.636371	-0.904937	-0.429765	-0.903871	0.288287	-0.734766	-0.132676	-0.297664	-0.0311822	0.0998726	-0.596676	-0.372153	0.331772	1.57458	-0.423617	-0.576139	-0.834147	-0.392952	-0.124823	-1.19775
ACATGCACATATCTCT-1_1	Cancer_HGSOC1	794	428	1.76322	NA	NA	0	0	0.246684	Singlet	Tumor	DC	epithelial	0.574243	-0.822687	-1.24672	-0.842015	-0.330627	-1.26584	-0.817908	-0.948963	0.0510202	-0.643934	-0.135387	-1.29462	-1.07811	-0.917701	-0.673366	-0.671721	-0.613229	-1.03125	-1.15404	-0.476216	-0.914912	-0.9074	-0.923139	-1.33642	-1.17842	-1.13213	-1.58536	-1.81137	1.58651	-0.939278	-1.27473	-1.18785	-1.38434	-0.813544	-0.599591	-0.798305
ACATGCAGTCCGGTCA-1_1	Cancer_HGSOC1	9329	2765	14.5139	NA	NA	1	1	0.27321	Singlet	Tumor	Macrophage	myeloid	-0.880569	0.166062	0.734969	0.0312338	0.084877	0.603947	-0.715711	0.191813	-0.894299	0.46243	1.99727	1.15128	0.0458205	-0.39196	0.0929651	0.222515	0.234628	-0.00694465	-0.0950668	-0.0889733	1.45524	0.250061	0.441915	0.831121	1.73839	2.29364	0.224441	0.27993	0.22426	2.45606	0.411486	0.0221675	-0.46092	-0.479381	0.100233	-0.106804
ACATGCATCACCTTGC-1_1	Cancer_HGSOC1	1738	706	3.79747	NA	NA	4	4	0.207781	Singlet	Tumor	NK_cell	T	-0.423659	-0.909307	-1.05444	-1.1026	-0.76594	-1.08881	-1.2967	-1.24256	-1.12083	-1.09582	-0.594635	-1.27883	-1.19493	-0.75193	-0.350807	-0.604441	-0.579767	-1.2283	-0.845498	-1.23815	-1.0568	-1.10234	-0.742752	-1.27558	-0.740755	-0.892045	-1.47585	-1.23672	0.909193	-0.541988	-1.28961	-1.11233	-1.48283	-0.559622	-0.799955	-1.19656
ACATGCATCCAGTGCG-1_1	Cancer_HGSOC1	3354	1611	11.0912	NA	NA	4	4	0.215738	Singlet	Tumor	T_cells	T	-1.32786	-0.849789	-0.0757769	-0.432699	-0.77327	-0.428147	-0.421815	0.0354219	0.565263	-0.300992	-0.74887	-0.372615	-0.390315	-0.275707	-0.478399	-0.187143	-0.494085	-0.375288	-0.34786	-1.29494	0.00578669	-0.597729	-0.763457	-0.0744492	-0.406673	-0.132349	-0.62642	-0.258009	0.552888	-0.103819	0.282618	-0.721089	-0.762261	-1.18121	-0.0174966	0.153436
ACATGCATCGACGAGA-1_1	Cancer_HGSOC1	3820	1556	6.5445	NA	NA	9	9	0.19275	Singlet	Tumor	NK_cell	CD8T	-0.572294	-0.682799	0.865946	-0.237329	-0.395486	-0.701874	-1.0668	-0.537924	-1.30342	-0.302883	-0.55982	-0.274893	-0.724787	-0.402384	0.062787	-0.689375	-0.232825	-1.12952	-0.393555	-0.539402	0.298643	-0.743298	-0.282027	-0.254602	0.25531	0.226784	1.20112	1.20907	0.892101	-0.596156	-0.601333	-0.574051	-0.322547	-0.105149	-0.0159513	-0.715832
ACATGCATCGACGATT-1_1	Cancer_HGSOC1	21222	4368	7.89746	NA	NA	1	1	0.310345	Singlet	Tumor	Monocyte	myeloid	-0.745894	1.35185	1.55688	1.33556	1.10605	0.551341	1.62865	1.20216	1.45761	1.06875	0.6449	1.91789	0.924938	0.29952	-0.228491	0.745358	0.43933	0.899572	0.683101	0.647534	1.5133	0.677385	1.21699	0.984549	2.52466	2.49647	-0.0100384	0.690284	-0.858677	2.63882	1.29681	1.25208	0.963495	-0.355867	-0.325739	1.31482
ACATGCATCGAGATAA-1_1	Cancer_HGSOC1	6106	2049	5.40452	NA	NA	2	2	0.230769	Singlet	Tumor	T_cells	CD4T	0.0990094	-0.542366	0.200492	0.25861	-1.04445	-0.0648773	-0.423762	0.30177	-1.20769	-0.437561	-0.467627	-0.116354	-0.441771	-0.233182	0.136139	0.513789	0.0694042	-0.556337	-0.195377	-0.334364	0.679761	-0.0439	0.709728	0.215648	-0.267385	0.264462	-0.311147	-0.239344	-0.0771165	0.89513	0.741228	0.0246	-0.096517	-0.692812	-0.557232	0.348282
ACATGCATCGGCATTA-1_1	Cancer_HGSOC1	5461	1960	12.2139	NA	NA	3	3	0.230769	Singlet	Tumor	NK_cell	NK	0.102645	-0.45951	0.864927	-0.292327	-0.621338	-0.431885	-0.284957	-0.531254	-0.48352	-0.308373	-0.856301	-0.505466	-0.518581	-0.177278	-0.501877	-0.621561	-0.465285	-0.771011	-0.563389	-0.731774	-0.0926242	-0.0203315	-0.220572	0.0606385	-0.406117	-0.175143	-1.39382	-0.588182	0.200404	0.238436	-0.0891221	-0.373159	0.0951209	-0.440326	-0.499844	-1.01923
ACATGCATCGTCTACC-1_1	Cancer_HGSOC1	8097	2749	4.6931	NA	NA	1	1	0.236074	Singlet	Tumor	Monocyte	myeloid	-0.375366	0.412998	1.0374	0.657509	0.0658819	-0.0950279	-0.151458	0.671919	-0.562675	-0.0218287	1.15556	0.849767	-0.357969	-0.206556	-0.478801	0.17772	0.295173	0.0946929	-0.159294	-0.177617	1.44157	0.948514	0.0764132	0.344838	0.727669	1.7018	-0.186302	0.426879	-0.0257368	1.90723	0.366238	0.301226	0.19967	-0.0051123	-0.240489	-0.77402
ACATGCATCTATCGCC-1_1	Cancer_HGSOC1	5195	1854	20.3465	NA	NA	2	2	0.214854	Singlet	Tumor	T_cells	CD4T	-0.888938	-0.568897	0.618013	-0.175292	-0.233054	-0.112772	0.0159141	0.0937144	-0.208945	-0.880751	-0.542262	-0.20917	-0.54618	-0.488433	-0.381325	-0.534956	-0.391253	-0.299198	-0.170276	-0.574196	-0.0135529	0.274032	0.255978	0.227946	0.224577	0.206808	-0.505701	-0.0370194	-0.0583807	0.304785	-0.119566	-0.340582	-0.609739	-0.632973	-0.872439	-0.221953
ACATTTCAGGAAACGA-1_1	Cancer_HGSOC1	20498	4717	24.2999	NA	NA	0	0	0.328028	Singlet	Tumor	Epithelial_cells	epithelial	-0.197735	1.69226	-0.923292	1.07151	0.251007	1.0421	1.36492	1.58423	1.73868	1.77572	0.681283	0.767447	0.789059	0.392581	-0.00251596	2.68371	2.31715	0.917921	1.02296	1.29532	0.343942	1.30851	1.21514	1.15862	1.15527	0.568217	0.422518	0.310688	-0.234047	-0.503977	1.57966	1.22619	0.79246	0.347048	1.36755	0.0751308
ACATTTCCAATGAACA-1_1	Cancer_HGSOC1	8011	2412	12.9073	NA	NA	1	1	0.248453	Singlet	Tumor	Macrophage	myeloid	1.14018	0.0560074	0.427879	-0.252719	0.406341	-0.268198	-0.695122	1.01146	-0.396173	0.176327	1.14005	1.26623	0.0601539	-0.277479	-0.0643763	-0.293618	-0.261582	-0.381361	-0.339511	-0.691747	-0.615735	0.283986	0.119737	0.410384	1.07635	2.11346	0.726378	0.617633	0.461657	2.12643	0.00731275	0.151538	-0.331816	0.00925839	-0.125787	0.1635
ACATTTCCAGCTGTCG-1_1	Cancer_HGSOC1	8631	2603	7.99444	NA	NA	1	1	0.243148	Singlet	Tumor	Monocyte	myeloid	-0.10896	0.12684	0.955306	-0.573699	0.963799	-0.551476	0.28579	0.883653	-0.216191	0.320934	1.06569	0.864105	-0.262385	-0.198683	-0.402812	-0.0473592	-0.0257136	0.316753	0.18507	0.355781	1.57637	0.219302	0.469533	0.781382	1.33279	1.49736	1.01659	0.857129	-0.181425	1.11177	0.13723	0.0921683	-0.0153801	-0.00508817	0.0819994	0.728204
ACATTTCCATGATCTG-1_1	Cancer_HGSOC1	2174	1099	15.7774	NA	NA	4	4	0.195402	Singlet	Tumor	NK_cell	T	-0.798251	-1.02912	-0.481758	-1.26092	-0.52967	-0.522218	0.0179498	-0.651224	-0.32123	-0.941364	-0.271232	-0.909414	-1.1101	-0.659753	-0.807249	-0.355181	-0.671016	-1.08168	-0.757623	-1.36988	-1.25132	-0.6605	-1.08637	-0.772992	-0.285566	-0.179751	-1.16621	-0.623595	0.336697	-0.26272	-0.601531	-1.16169	-1.22085	-0.855632	-0.563149	-1.12089
ACATTTCGTAACGATA-1_1	Cancer_HGSOC1	2296	1040	14.2857	NA	NA	4	4	0.239611	Singlet	Tumor	T_cells	T	-0.317732	-0.986076	-0.73324	-0.378976	-0.920209	-0.533542	-1.09964	-0.694547	0.204152	-1.24021	-0.740473	-0.815696	-1.1288	-0.753177	-0.40267	0.0845538	-0.45443	-0.931725	-0.760946	-1.11135	-1.22228	-0.659891	-0.529741	-0.254728	-0.454723	-0.144299	-0.910021	-0.903745	1.00352	-0.589348	-0.664432	-1.22172	-1.07631	-0.648009	-0.411674	-1.36275
ACATTTCTCCCTTCCC-1_1	Cancer_HGSOC1	7184	2447	14.9916	NA	NA	0	0	0.257294	Singlet	Tumor	Epithelial_cells	epithelial	-0.649763	-0.659586	-1.22364	0.389548	0.973897	-0.250677	0.187012	0.0789747	0.0571575	-0.00756566	0.247847	-0.760336	-0.497695	-0.164566	-0.0659734	0.337112	-0.188743	-0.788759	0.400659	-0.303605	0.457142	0.0385289	-0.22971	-0.374111	-0.449935	-0.867213	-0.558816	-0.450351	-0.363419	-1.03208	0.326503	-0.416772	-0.253707	0.189841	0.361987	0.398829
ACCAAACAGCAGGCAT-1_1	Cancer_HGSOC1	959	723	2.18978	NA	NA	0	0	0.255526	Singlet	Tumor	Epithelial_cells	epithelial	-0.231331	-0.771077	-1.32238	-0.425248	-0.45105	-0.756958	-0.587384	-0.784159	0.121062	-0.442421	0.653936	-0.882778	-1.16226	-0.44635	-0.216946	-0.0227353	0.165492	-0.836796	-0.455857	-0.525967	-0.433772	-1.15079	-1.29364	-1.37091	-1.46704	-0.568302	-1.43957	-1.46336	1.06537	-0.316718	-0.321268	-0.83889	-1.22042	-0.565846	-0.74776	-0.517223
ACCAAACAGGAACATT-1_1	Cancer_HGSOC1	3790	1619	5.93668	NA	NA	5	5	0.221043	Singlet	Tumor	T_cells	CD8T	0.00540617	-0.422554	1.25723	-0.526216	-0.942564	-0.377126	-0.138938	-0.687673	-0.822441	-0.706944	-0.370029	-0.211759	-0.152132	-0.619506	-0.54473	-0.511719	-0.776857	-0.581635	-0.646047	-0.928168	-0.475304	-0.497692	-0.882455	-0.360489	0.582398	-0.373753	-1.37894	-0.678251	-0.125003	-1.11816	-0.432678	-0.492512	-0.524572	-0.576976	-0.835215	-0.945126
ACCAAACAGTACCATC-1_1	Cancer_HGSOC1	14788	3287	17.1626	NA	NA	1	1	0.327144	Singlet	Tumor	Monocyte	myeloid	1.23627	0.525124	1.7802	1.03207	0.631332	0.486187	-0.0239062	0.979439	1.3675	0.238748	0.388206	1.66737	0.48204	0.502183	0.28257	0.132258	0.0730674	-0.196941	0.771791	-0.00935486	1.0332	0.0215626	1.29478	1.16789	2.41985	3.18494	2.26152	2.0738	-0.51582	2.55031	0.605244	1.2888	0.74981	0.395366	-0.0814121	1.62245
ACCAAACAGTAGCAAT-1_1	Cancer_HGSOC1	67357	7784	12.4085	NA	NA	0	0	0.298851	Singlet	Tumor	Epithelial_cells	epithelial	4.3937	2.43285	-0.604563	2.60722	1.83536	1.89827	1.67458	1.94804	-0.00202471	2.16392	1.56759	0.79549	2.10775	2.66889	0.245502	2.78035	2.53108	2.05829	3.24676	2.14097	1.21553	2.78404	1.42703	0.839838	0.82937	-0.0749465	0.406935	0.511869	-1.8163	-0.788648	3.41015	1.93267	1.96997	1.98624	0.955765	2.56053
ACCAAACAGTTACTCG-1_1	Cancer_HGSOC1	10465	2804	7.14763	NA	NA	12	12	0.344828	Singlet	Tumor	GMP	B	0.223267	0.578445	0.567392	-0.209479	1.42423	-0.633439	0.767739	-0.395525	0.345768	-0.561042	-0.354684	0.604403	0.51049	0.0388064	-0.575215	-0.101731	-0.36339	-0.172816	-0.188526	-0.782637	-1.38112	0.309193	-0.305379	0.498317	1.33986	0.412077	-0.430015	-0.0304986	-1.3913	0.213238	-0.173875	0.290039	0.479352	-0.232364	-0.106695	1.16725
ACCAAACGTTGAGAGC-1_1	Cancer_HGSOC1	9675	3067	6.71835	NA	NA	5	5	0.185676	Singlet	Tumor	NK_cell	CD8T	-0.240445	0.160393	1.54725	0.154841	-0.571297	0.140592	-0.00508727	0.882212	-0.140369	0.448122	-0.551	0.89106	0.475862	-0.111798	-0.546852	0.410475	0.366054	0.258457	0.604612	-0.437184	-0.812068	-0.675906	0.00907842	0.56692	0.953649	0.69629	0.718529	1.11067	-0.0459652	-0.054051	0.191915	0.151237	0.169785	-0.52524	-0.358288	-1.15659
ACCAACAAGCAACTCT-1_1	Cancer_HGSOC1	3051	1350	23.8938	NA	NA	4	4	0.204244	Singlet	Tumor	NK_cell	T	1.23652	-1.13815	-0.525749	-0.180131	-0.861934	-0.739573	0.71159	-0.378189	-0.158188	-0.605389	0.076178	-0.128023	-0.634183	0.502271	-0.244039	-0.109384	-0.539938	-1.46451	0.528589	-0.519637	-0.291796	-0.715851	-0.383942	-0.177406	-0.584131	0.112184	-1.33623	-0.959958	0.319479	0.660541	0.909517	-0.498387	-0.945896	-0.551883	0.0192129	-0.111325
ACCAACAAGGTACTGG-1_1	Cancer_HGSOC1	3867	1513	11.5076	NA	NA	1	1	0.305924	Singlet	Tumor	Monocyte	myeloid	0.972255	-0.165566	0.241799	-0.531964	-0.098143	-0.493248	1.09013	-0.14321	-0.232678	0.678769	0.894078	0.455732	-0.428694	-0.627356	-0.121304	-0.350458	-0.51417	0.329343	-0.627022	0.127638	-0.965626	-0.0656985	-0.204761	-0.0833228	0.321906	1.27596	0.382002	0.197704	0.570261	1.51094	-0.790767	-0.208021	-0.309369	-1.02704	-0.314054	-0.037795
ACCAACAAGGTTACCT-1_1	Cancer_HGSOC1	5543	1898	4.6004	NA	NA	2	2	0.232538	Singlet	Tumor	T_cells	CD4T	-1.62646	-0.632544	0.244068	0.570041	-0.48788	-0.528024	0.278937	0.314308	0.336187	-0.228871	-0.500201	0.109317	-0.139071	0.329413	-0.211618	0.0449265	-0.145262	-0.522587	0.00694489	-0.22247	-0.921666	-0.050117	0.0279409	0.110428	-0.428858	0.674205	-0.0893358	-0.1733	-0.116942	-0.275787	-0.505513	-0.172861	0.173826	-0.321236	-0.538696	-0.833437
ACCAACAAGTCATACC-1_1	Cancer_HGSOC1	4636	1960	5.32787	NA	NA	2	2	0.185676	Singlet	Tumor	T_cells	CD4T	-0.648963	-0.518586	0.642364	0.0321301	-1.17666	-0.518343	0.657465	-0.40966	-0.77495	-1.27123	-0.942037	-0.306616	-0.643905	-0.165198	-0.446952	0.232975	-0.246836	-0.606209	-0.279173	-0.395538	-0.326415	-0.299986	-0.119817	-0.602528	-0.300118	0.19531	0.642503	0.387527	-0.154484	0.387182	-0.0656171	-0.500481	-0.180977	-0.490441	-0.53288	-0.00387467
ACCAACACAAAGAACT-1_1	Cancer_HGSOC1	3632	1637	6.0022	NA	NA	3	3	0.229001	Singlet	Tumor	NK_cell	NK	-0.754987	-0.541696	0.310484	-0.942241	-1.07567	-0.260695	0.875724	-0.212058	0.365713	-0.259042	-1.04356	-0.273692	-0.649888	-0.443349	-0.204587	-0.490849	-0.533082	-0.547754	-0.420506	-0.219647	-0.888283	-0.312936	0.343306	-0.361734	0.178221	0.0503257	0.837627	0.871616	0.246249	-0.120727	-0.592681	-0.397137	-1.03051	-0.641754	-0.663273	-0.194986
ACCAACACAAAGTGTA-1_1	Cancer_HGSOC1	6990	2337	18.6123	NA	NA	1	1	0.297966	Singlet	Tumor	Macrophage	myeloid	0.928493	-0.3432	0.549786	-0.454013	1.45906	-0.608617	0.910546	0.155241	-0.400622	-0.246273	0.310423	0.187109	-0.90793	-0.260186	-0.011651	-0.453945	-0.161259	-0.320436	-0.105509	-0.168089	0.722164	0.357765	0.714623	0.779913	0.574496	0.96872	0.0425643	-0.146251	1.03949	1.44832	0.529062	0.0150101	-0.48226	-0.605167	0.318847	0.686621
ACCAACACACTAAACC-1_1	Cancer_HGSOC1	4938	2156	6.64237	NA	NA	3	3	0.183908	Singlet	Tumor	NK_cell	NK	-1.19359	-0.50815	0.900979	-0.531054	-0.350487	-0.313021	-0.0316275	-0.755389	-0.501832	0.363593	-0.654357	0.278976	-0.763283	-0.00514944	-0.527854	-0.347061	-0.357799	-0.125832	0.290252	-0.910436	-0.0399854	-0.178112	-0.38557	0.2454	0.611012	-0.425103	0.10961	-0.0320224	-0.254307	-0.12413	0.0750302	-0.257417	-0.178088	-0.248878	-0.975362	0.00897336
ACCAACAGTCTCTCCA-1_1	Cancer_HGSOC1	5615	2130	9.33215	NA	NA	3	3	0.21397	Singlet	Tumor	NK_cell	NK	0.0535912	-0.535873	0.406741	-0.973975	0.1258	-0.482804	1.66201	0.249372	-0.403158	-0.187676	-0.421127	0.0962336	-0.0342144	-0.377547	-0.627125	-0.588186	-0.586258	-0.182971	-0.138814	-0.745348	0.367799	-0.109768	-0.0534149	0.183365	0.335142	0.064666	1.12456	1.23558	0.35508	0.161404	0.174755	-0.685991	-0.572237	-0.424204	-0.259001	0.146253
ACCAACAGTTCCTAAG-1_1	Cancer_HGSOC1	27567	5368	13.995	NA	NA	7	7	0.318302	Singlet	Tumor	Monocyte	CD8T	-0.28234	1.58356	1.09545	1.26994	1.27385	0.952884	0.647211	1.41573	-0.854938	0.758755	1.35867	2.22019	1.12216	2.58581	0.0505075	0.426713	0.954882	1.18992	3.18241	0.569912	1.43602	1.21464	1.15132	1.25606	1.58633	2.39503	0.146753	0.818288	-1.66355	2.37496	3.09034	1.69749	1.25816	0.0830204	0.408691	-0.0188024
ACCAACATCACTGATG-1_1	Cancer_HGSOC1	27970	4950	10.0286	NA	NA	1	1	0.221927	Singlet	Tumor	Macrophage	myeloid	0.88385	1.00654	1.61769	1.82416	0.418181	1.07294	-0.0780275	1.84682	1.58927	0.616099	1.86662	2.4165	0.842039	0.247819	0.201822	0.655086	-0.262015	1.06472	0.344457	0.513994	0.424647	1.51562	1.19769	1.6281	2.17541	2.69915	0.575617	1.30121	-1.68584	3.1338	0.835615	0.925555	1.03503	1.04169	1.2069	0.78481
ACCAACATCCGGCAAC-1_1	Cancer_HGSOC1	32210	5864	5.92363	NA	NA	1	1	0.247569	Singlet	Tumor	Monocyte	myeloid	-1.1014	1.26315	2.47861	1.72235	0.100256	1.17788	1.66975	2.26113	-1.14063	1.24348	1.86734	3.81998	1.22604	0.7588	-0.0977836	0.605394	0.727845	0.821532	1.20602	0.704093	0.880706	1.65575	1.4785	2.53475	2.45702	2.84281	1.81463	2.4621	-0.641951	2.7663	1.58559	1.49	1.06889	1.19531	0.417629	0.599557
ACCACAAGTAGCCAGA-1_1	Cancer_HGSOC1	6447	2093	5.83217	NA	NA	2	2	0.240495	Singlet	Tumor	T_cells	CD4T	-0.285005	-0.308025	0.160612	-0.456546	-1.10248	-0.260877	0.570563	-0.382895	-0.233876	0.00602109	-0.725026	-0.17978	-0.747131	0.118458	-0.452927	0.0540423	-0.368236	-0.491396	-0.390487	0.161514	-1.01375	-0.34647	0.353539	0.159007	0.893963	-0.162979	-0.922576	-0.369927	0.565066	0.0336718	-0.00185179	-0.268849	0.0804918	-0.0840509	-0.453899	-0.663096
ACCACAATCGCTTGAA-1_1	Cancer_HGSOC1	5285	2037	7.228	NA	NA	3	3	0.183024	Singlet	Tumor	NK_cell	NK	-1.72813	-0.528101	0.271101	-0.0529517	-1.01388	-0.160219	-0.320223	0.120362	0.747238	-0.36579	-0.558078	-0.416506	-0.669096	-0.0723278	-0.326657	-0.0982357	-0.216486	-0.387021	-0.0993968	-0.784887	-0.20234	-0.591783	0.0724083	0.725741	0.0181393	-0.177427	-0.801734	-0.603217	0.320759	0.337292	0.135056	-0.0752807	-0.436928	-0.71262	-0.325825	0.386137
ACCATTTAGCCGCACT-1_1	Cancer_HGSOC1	9316	2688	15.3714	NA	NA	1	1	0.237843	Singlet	Tumor	Macrophage	myeloid	-0.151133	-0.680281	0.518014	0.245177	-0.603145	-0.257475	1.48361	0.815547	-0.0847612	0.0732502	1.09533	1.17367	-0.000968265	0.0818823	-0.277698	0.0942525	-0.402934	-0.33411	0.21291	-0.269759	0.0788531	-0.0996946	0.922379	1.28529	1.37171	1.78543	-0.693975	0.150981	-0.119648	0.866748	0.524509	-0.271778	-0.17271	0.956595	-0.0120673	0.815679
ACCATTTCAGCAATTC-1_1	Cancer_HGSOC1	4378	1851	8.01736	NA	NA	3	3	0.184792	Singlet	Tumor	NK_cell	NK	-0.931223	-0.392561	0.841447	-0.175667	0.958108	0.0882492	1.95842	-0.500888	0.447784	0.578278	-0.746629	0.0965967	0.154581	-0.431075	-0.29405	-0.452501	-0.0376883	-0.184444	-0.0287487	-0.483106	-0.357605	-1.06358	-0.440975	0.670802	-0.480844	0.318339	-1.14659	-0.696313	0.321045	-0.0746583	0.186043	-0.155721	-0.300647	-0.222446	0.142008	-1.06856
ACCATTTGTCGCTTGG-1_1	Cancer_HGSOC1	6263	1942	13.444	NA	NA	1	1	0.29443	Singlet	Tumor	Monocyte	myeloid	-1.00037	-0.849199	0.644088	-0.559304	-0.910406	-1.14647	1.18837	0.33772	0.107519	-0.193368	0.196137	0.468796	-0.860132	-0.631407	-0.592747	-0.42198	-0.165878	-0.552771	-0.189511	-1.1396	0.672299	-0.108613	0.00944846	0.658748	0.972013	1.64596	0.170897	0.535385	0.0726189	1.36342	-0.276938	-0.663555	-0.521707	-0.810896	-0.293411	-0.40021
ACCATTTTCCTTGAAG-1_1	Cancer_HGSOC1	4840	1951	8.11983	NA	NA	3	3	0.20336	Singlet	Tumor	NK_cell	NK	-0.592535	-0.453748	1.18791	-0.080615	0.225535	-0.263236	0.516938	-0.923478	-0.00483093	-0.492543	-0.404179	-0.0812693	-0.623512	-0.249732	-0.349363	-0.415612	-0.0643906	-0.145409	0.00170907	-0.646136	0.0750151	-0.388592	-0.00970508	-0.2615	0.105735	-0.244125	-0.780861	-0.149133	0.0107057	-0.232616	-0.134756	0.427864	-0.108179	-0.112486	-0.724495	-0.785787
ACCCAAAAGGATACAT-1_1	Cancer_HGSOC1	15683	4518	12.8993	NA	NA	0	0	0.325376	Singlet	Tumor	Epithelial_cells	epithelial	-0.294126	1.22276	-0.823229	0.78019	1.25927	0.941643	2.07782	1.45546	2.54039	1.06177	1.0646	0.848222	1.05085	0.531245	0.0242284	2.1883	2.11983	0.627246	0.691776	0.400009	1.16772	1.24845	0.588968	-0.113207	-0.377895	0.136815	0.00522263	0.0729441	-1.09153	-0.216034	1.05866	0.705589	0.978903	0.745356	1.17587	-0.106892
ACCCAAACAACTGGTT-1_1	Cancer_HGSOC1	20159	5092	19.0238	NA	NA	0	0	0.31565	Singlet	Tumor	Epithelial_cells	epithelial	-0.591566	1.17332	-0.506729	1.6094	-0.0184178	1.40341	0.484176	0.879891	0.0606133	1.03911	0.261259	0.494653	1.10421	0.650221	0.160503	1.60261	2.04303	0.858536	0.582703	1.25596	1.48766	1.2421	0.620228	-0.63637	-0.199796	-0.0434799	-0.445198	-0.567806	0.597949	-0.661174	1.42398	0.774585	0.94422	1.7391	1.98417	0.302149
ACCCAAACACAAATCC-1_1	Cancer_HGSOC1	11519	3362	20.3143	NA	NA	0	0	0.28824	Singlet	Tumor	Epithelial_cells	epithelial	0.723761	0.176093	-0.561495	0.144352	0.847711	1.16792	0.171221	0.522058	-1.53213	0.391041	0.365931	-0.655741	0.00490902	0.874586	0.616151	1.59194	1.01736	-0.690588	0.843317	0.464388	-0.204942	0.889786	0.378253	0.135004	-0.807453	-0.668412	-0.866045	-0.720858	-0.263811	0.468359	0.67087	0.139662	0.407527	1.03592	1.04553	-0.583597
ACCCAAACAGTGTACT-1_1	Cancer_HGSOC1	32101	5387	9.51372	NA	NA	1	1	0.32626	Singlet	Tumor	Macrophage	myeloid	-0.386664	1.70866	2.43013	2.15868	1.45049	0.913643	-0.533044	2.1226	0.123052	1.44824	1.34938	2.86792	1.82127	1.55426	0.103426	0.783774	1.12558	1.63266	1.29694	1.88831	1.8169	2.31527	2.10537	2.55952	2.45422	2.60016	0.909965	1.69288	-2.87889	3.14842	1.37453	2.18621	1.84734	2.0858	0.743284	1.23889
ACCCAAATCCGATGTA-1_1	Cancer_HGSOC1	6947	1791	20.0518	NA	NA	1	1	0.282051	Singlet	Tumor	Monocyte	myeloid	-0.417315	-0.517213	0.0907641	-0.808946	-0.168243	0.174289	-0.882491	0.290689	-1.14677	0.603336	0.716485	0.656369	-0.586387	-0.17818	-0.0265713	0.209157	0.345649	-0.839067	-0.152843	-0.765723	0.0464368	0.0814998	0.578617	0.573407	0.649048	2.43654	-0.252215	-0.102316	1.08003	1.07227	0.118326	-0.336395	-1.07404	-0.408283	-0.20513	-0.0610537
ACCCAAATCGGATTAC-1_1	Cancer_HGSOC1	4830	1242	15.8178	NA	NA	10	10	0.217507	Singlet	Tumor	B_cell	B	0.160911	-0.873069	-0.794399	-0.639114	-0.713798	-0.788556	-0.701652	-0.637493	-0.237071	-1.07024	-0.724335	-1.36957	-0.785575	-0.721979	-0.447509	-0.421503	-0.610004	-0.868823	-0.587111	-0.607757	-0.0178574	-0.244172	-0.95199	-1.34064	-1.01455	-0.442828	-1.18553	-0.933079	1.05643	-0.313665	-0.730631	-0.7409	-0.986405	-0.552029	-0.122586	-0.606434
ACCCAAATCTCTGGTC-1_1	Cancer_HGSOC1	8205	2635	18.1597	NA	NA	5	5	0.248453	Singlet	Tumor	T_cells	CD8T	-1.29206	0.335482	1.65747	-0.615072	-0.752247	0.0997953	0.301828	0.336922	0.614041	-0.110538	-0.347065	1.14899	0.232369	0.219862	-0.194684	-0.398514	-0.623481	-0.111178	-0.00593766	-0.071235	0.26802	0.29941	0.505357	0.629066	0.591218	0.547462	0.352298	0.642808	-0.010932	0.88465	0.563375	0.275323	0.509778	-0.355135	-0.489564	1.03267
ACCCTCAAGCATCCTA-1_1	Cancer_HGSOC1	32317	6411	15.0354	NA	NA	0	0	0.321839	Singlet	Tumor	Epithelial_cells	epithelial	-0.131743	1.66648	-1.04477	1.90622	1.93994	1.84995	1.01369	1.86973	1.41824	1.80451	0.574196	0.37966	1.8305	0.981418	0.0591286	2.32592	1.77141	1.34078	0.868671	0.904941	1.68579	2.02282	1.20731	0.207341	-0.236755	0.00577395	0.307572	0.477678	-1.71758	-2.45408	1.65741	1.0769	1.39291	2.12796	2.29237	2.10936
ACCCTCAAGCGTTCAT-1_1	Cancer_HGSOC1	5286	1550	24.6122	NA	NA	1	1	0.316534	Singlet	Tumor	Macrophage	myeloid	-0.544894	-0.742053	-0.246328	-0.636953	1.28674	-0.413789	-0.0861013	-0.209768	-1.10751	-0.0899538	0.442275	0.100885	-0.882534	-0.444756	-0.152993	-0.382052	-0.655941	-0.708239	-0.314531	-0.289946	1.15947	-0.562712	0.528745	0.165234	0.987362	0.845133	-0.896339	-0.164744	0.701596	2.68879	0.725077	-0.339969	-1.20309	-0.917543	0.240187	-0.165673
ACCCTCAAGGCATTTC-1_1	Cancer_HGSOC1	2324	1032	10.5422	NA	NA	4	4	0.237843	Singlet	Tumor	T_cells	T	-0.746021	-1.20761	-0.391821	-0.631423	-0.723375	-0.814936	0.27279	-0.580443	-1.22177	-0.785477	-0.61212	-0.936928	-1.1864	-0.78974	-0.458169	-0.143709	-0.549397	-0.690469	-0.442427	-0.466557	-0.235021	-0.698919	-0.256919	-0.424703	-1.16731	-0.701682	-1.50725	-1.13836	0.744028	-0.370371	-0.693016	-0.747529	-0.895275	-1.05221	-0.473377	-1.09433
ACCCTCAAGTGGGAAA-1_1	Cancer_HGSOC1	3778	1674	7.46427	NA	NA	3	3	0.220159	Singlet	Tumor	NK_cell	NK	1.20464	-0.733831	-0.376249	-0.758368	-0.214338	-0.568717	-0.810633	-0.769396	-1.52027	-0.93952	-0.694448	-0.176161	-0.333309	-0.596895	-0.577504	-0.500288	-0.469116	-0.48278	-0.746008	-0.581659	-0.664479	-0.378303	-0.255415	0.194334	1.11552	0.242292	0.788408	0.736232	0.499594	0.0794229	-0.785907	-0.527794	-0.829246	-0.203185	-0.598736	-0.175995
ACCCTCACAACACGTT-1_1	Cancer_HGSOC1	4112	1692	7.97665	NA	NA	3	3	0.205128	Singlet	Tumor	NK_cell	NK	-1.17175	-0.355084	0.648233	-0.665021	-0.481374	-0.159287	1.07636	-0.266671	-0.500503	-0.562201	-0.976282	-0.282994	-0.7655	-0.389288	-0.460887	-0.691336	-0.564619	-0.531451	-0.623173	-0.694925	-1.28604	-0.493623	-0.395833	-0.506901	-0.331265	-0.326646	-0.529801	-0.521733	0.100454	-0.141075	-0.735086	-0.661822	-0.449057	-0.626765	-0.680296	-0.750945
ACCCTCACAAGCACAG-1_1	Cancer_HGSOC1	3636	1580	10.396	NA	NA	4	4	0.167993	Singlet	Tumor	T_cells	T	-0.640174	-1.40053	0.106119	-0.680413	-1.18527	-0.369848	-0.341003	-0.607371	-0.12184	-0.479757	-0.531896	-0.50644	-0.849637	-0.491952	-0.616915	-0.38414	-0.953158	-1.24613	0.430085	-0.903163	-0.193625	-0.510629	-0.869607	-0.921108	0.262667	0.403467	0.205149	0.130204	0.780387	-0.0717789	0.0771371	-0.854291	-0.497382	-0.537342	-0.652512	-0.302018
ACCCTCACAAGTTGGG-1_1	Cancer_HGSOC1	8838	2492	19.0767	NA	NA	1	1	0.279399	Singlet	Tumor	Macrophage	myeloid	-1.14799	-0.107897	0.743839	-0.453293	-0.427337	0.4838	0.500216	0.507071	-1.03502	0.616758	0.667198	0.515862	0.0900367	-0.249372	-0.167632	-0.903096	-0.842827	0.555334	-0.0484078	-0.0984994	-0.717979	0.316166	0.254489	-0.0523864	0.0282299	0.703024	0.295455	0.377565	-0.429787	1.15854	0.0151503	0.0574762	0.0325577	0.160544	0.0568405	1.07212
ACCCTCACAATGGCAG-1_1	Cancer_HGSOC1	1730	720	13.7572	NA	NA	4	4	0.21397	Singlet	Tumor	NK_cell	T	0.471087	-1.20838	-0.918313	-1.16297	-0.54667	-0.941118	-0.0449666	-0.824062	0.10717	-0.587621	-0.615239	-0.710639	-0.960941	-0.777413	-0.247452	-0.658819	-0.782251	-0.916951	-0.716678	-1.09177	0.382961	-0.65359	-1.2638	-1.10113	-0.233381	-0.476435	0.573613	0.1802	1.36391	-0.0474523	-0.732596	-1.27064	-1.04005	-0.468591	-0.610217	0.227791
ACCCTCACAGCGACCT-1_1	Cancer_HGSOC1	1135	487	1.85022	NA	NA	0	0	0.220159	Singlet	Tumor	NK_cell	epithelial	-0.204081	-0.58996	-1.42228	-1.27552	-0.661881	-1.22876	-0.852347	-1.02183	-0.000161183	-0.653596	0.0985639	-1.75748	-0.897315	-1.11973	-0.538058	-0.771006	-0.804226	-0.936309	-1.37672	-0.822879	-0.948234	-1.03181	-1.40337	-1.81812	-1.29232	-1.03792	-1.39764	-1.75493	1.32931	-0.694994	-1.43652	-1.29904	-1.13742	-0.853615	-0.785601	-0.365249
ACCCTCAGTCATATGC-1_1	Cancer_HGSOC1	9569	3229	7.5243	NA	NA	11	11	0.205128	Singlet	Tumor	Endothelial_cells	endothelial	0.926705	0.0309006	-0.564091	0.949142	1.09264	2.00019	2.70718	0.304177	-0.899034	-0.408615	1.57272	0.0684423	-0.120905	-0.194252	0.979352	0.317826	0.0162189	-0.255806	0.167157	-0.0465499	2.15676	0.655105	0.0897812	1.10684	0.0992182	-0.0604536	-0.44374	-0.815562	-0.378971	1.33187	1.35204	-0.42182	-0.00928743	-0.755398	0.65324	-0.797451
ACCCTCATCGGAAGGT-1_1	Cancer_HGSOC1	3057	1129	0.556101	NA	NA	0	0	0.30504	Singlet	Tumor	Epithelial_cells	epithelial	2.00213	-0.0196698	-1.32966	-0.524939	-0.835969	-0.683207	-0.58884	-0.481484	0.560853	-0.528497	0.250981	-0.615264	-0.641766	-0.544802	-0.407249	-0.291254	0.0750634	-0.530357	-0.78631	-0.205165	-0.784498	-0.635612	-0.953925	-1.67106	-1.67305	-1.30117	-0.647073	-1.2068	1.01534	-1.00581	-1.14737	-0.758494	-0.447953	0.181781	-0.434276	0.241255
ACCCTCATCGTTCCCA-1_1	Cancer_HGSOC1	2766	1214	8.64064	NA	NA	2	2	0.184792	Singlet	Tumor	T_cells	CD4T	-0.245815	-1.06636	-0.50755	-0.197301	-0.685384	-0.656182	-0.68739	-0.790268	-0.592784	-0.629225	-0.484984	-0.708261	-0.525104	-0.637305	-0.372172	-0.0529258	-0.500528	-1.10748	-0.577898	-0.336844	0.153699	-0.691282	-0.00461712	-0.136116	-0.247878	-0.342611	-0.723192	-1.07954	0.71602	-0.607812	-0.771085	-0.682355	-0.741258	-1.01405	-0.483973	-0.525885
ACCCTTGAGCTTCGTA-1_1	Cancer_HGSOC1	1462	729	23.5294	NA	NA	4	4	0.195402	Singlet	Tumor	NK_cell	T	-0.465838	-1.34806	-0.420855	-0.950131	-0.786865	-0.766512	-0.767953	-1.10987	-0.758619	-0.657588	-0.682339	-1.0291	-1.0082	-1.0283	-0.550316	-0.604402	-0.856171	-1.3271	-1.01085	-1.0286	-0.34934	-0.959098	-1.1165	-0.78404	-0.457176	0.0927146	-0.947584	-0.816418	1.3097	0.382066	-0.666608	-1.2671	-1.55899	-0.948338	-0.514086	0.193165
ACCCTTGAGTAAGACT-1_1	Cancer_HGSOC1	1327	690	1.50716	NA	NA	7	7	0.231653	Singlet	Tumor	NK_cell	CD8T	0.979229	-0.85028	-1.26635	-0.884322	-0.772261	-0.818764	-0.98326	-1.10419	-0.514663	-0.546104	-0.638821	-1.31294	-0.787698	0.0723409	-0.564422	-0.758636	-1.05022	-0.521514	-0.071603	-0.954526	-1.06563	-1.34088	-1.394	-1.2406	-1.5164	-1.31485	-1.12996	-1.55186	0.698365	-1.30989	-0.599709	-1.15415	-0.93823	-0.620403	-0.69307	-0.60734
ACCCTTGCAAAGGGTC-1_1	Cancer_HGSOC1	6039	2303	6.54082	NA	NA	3	3	0.200707	Singlet	Tumor	NK_cell	NK	-0.446035	-0.040396	0.317377	-0.0273185	-1.17962	-0.295012	-0.0419292	-0.782877	0.203384	-0.176424	-0.694977	-0.52156	0.0762488	-0.232284	-0.187891	-0.184182	-0.183729	0.22583	-0.308606	-0.0849411	-0.371761	-0.362204	-0.207722	-0.00598101	0.246243	-0.123524	-0.452736	-0.26302	-0.296794	-0.0653057	0.0367782	0.480211	0.379857	-0.0493127	-0.884954	-0.55817
ACCCTTGCACATATGC-1_1	Cancer_HGSOC1	6280	2323	5.39809	NA	NA	1	1	0.306808	Singlet	Tumor	Monocyte	myeloid	-1.12959	0.13449	0.305612	0.2714	0.261777	0.531571	-0.298791	0.466225	0.856165	0.151114	1.17755	1.41848	-0.561985	-0.331118	0.396476	-0.0861753	-0.151499	-0.059213	-0.213566	0.0880816	1.83624	0.314865	1.80668	1.00919	1.22788	2.70488	0.448779	1.01192	0.38396	2.35992	0.212303	0.0864719	-0.403106	-0.452413	0.338887	1.02074
ACCCTTGCAGTCCGTG-1_1	Cancer_HGSOC1	6505	2336	15.8493	NA	NA	1	1	0.337754	Singlet	Tumor	Macrophage	myeloid	0.954459	-0.124918	0.438947	0.460398	0.361949	-0.0496949	-0.000741128	0.371746	0.224095	0.419509	0.921067	0.745583	-0.46509	-0.705966	-0.25663	0.366658	0.312105	-0.135397	-0.451751	0.204785	0.872786	0.813392	0.868344	1.36843	1.99219	1.25381	-0.259754	-0.380592	-0.0161768	1.35317	0.123244	0.178762	-0.358304	-0.560317	-0.0139027	-0.869435
ACCCTTGGTGGTACAG-1_1	Cancer_HGSOC1	5796	1745	4.00276	NA	NA	2	2	0.229885	Singlet	Tumor	T_cells	CD4T	-0.759177	-0.755979	0.0842299	-0.109939	-0.312449	-0.0713212	-1.5142	-0.204355	-0.616563	-1.00031	-0.513796	-0.259339	-0.424924	-0.160903	-0.301045	-0.288215	-0.272459	-0.867796	-0.0194275	-0.616154	-0.889682	-0.0638873	-0.405775	-0.348427	-0.613215	-0.330165	-1.30264	-1.15869	0.0932819	0.312477	-0.107217	-0.229811	-0.217268	-0.0790698	-0.822909	-1.47172
ACCCTTGTCGTCAAAC-1_1	Cancer_HGSOC1	1448	712	1.5884	NA	NA	5	5	0.206012	Singlet	Tumor	NK_cell	CD8T	-0.415233	-0.535445	-0.377439	-1.05626	-0.656157	-0.957575	-0.518789	-1.2319	0.15563	-0.20694	-0.458521	-0.957205	-1.059	-0.958726	-0.507769	-0.662376	-0.579347	-0.209267	-0.972958	-0.678742	-1.05266	-1.28832	-1.47665	-1.16039	-0.495411	-0.640146	-0.51774	-0.85583	0.935425	-0.761802	-1.21925	-1.03135	-0.783322	-0.985416	-0.637009	-0.239162
ACCGTTCAGATGAATC-1_1	Cancer_HGSOC1	4080	1422	24.6814	NA	NA	1	1	0.305924	Singlet	Tumor	Monocyte	myeloid	0.178772	-0.679927	-1.06124	-0.766856	-0.0788601	-0.904019	-0.859924	-0.771367	0.0489879	-0.0923311	-0.0403698	-0.572495	-0.653873	-0.654776	-0.432877	-0.417536	-0.237656	-0.851871	-0.735976	-0.667716	0.040637	-0.278484	-0.443567	-0.331015	-0.0944775	0.966918	-0.939	-0.684356	1.00143	0.488434	-0.579328	-0.847251	-0.815436	-0.797879	0.0916819	-0.150146
ACCGTTCAGTCAGAGC-1_1	Cancer_HGSOC1	10708	3579	14.6526	NA	NA	11	11	0.223696	Singlet	Tumor	Endothelial_cells	endothelial	-0.307449	0.578666	-1.03206	0.51593	1.84458	1.85815	0.465643	0.233993	-1.13781	-0.062001	0.954048	0.46738	0.444396	-0.443796	1.14654	0.0259256	-0.301878	-0.674275	0.0478203	-0.732429	1.60836	0.957003	-0.397148	0.22628	0.509824	0.338883	-0.192976	-0.529845	-0.780964	0.118682	1.0516	-0.0631048	0.298249	0.0405919	0.347992	-1.27743
ACCGTTCCACCTGCAG-1_1	Cancer_HGSOC1	3667	1547	23.3161	NA	NA	3	3	0.18214	Singlet	Tumor	NK_cell	NK	0.117372	-0.919684	0.0832715	-1.07152	-0.556862	-0.621622	1.02138	-0.820545	-0.180352	-0.491724	-0.41393	-0.265504	-0.570892	-0.738738	-0.760669	-0.434862	-0.501942	-0.673335	-0.612714	-0.893209	-0.063209	-0.724968	-0.656245	-0.204497	-0.0281188	-0.566479	-1.12334	-0.339221	0.0711417	-0.360031	-0.310325	-0.927384	-0.924166	-0.859616	0.084842	-0.939865
ACCGTTCCAGCTGTTA-1_1	Cancer_HGSOC1	1904	971	11.9748	NA	NA	4	4	0.170645	Singlet	Tumor	T_cells	T	0.30473	-1.143	-1.20761	-0.724741	-0.896317	-1.29764	-1.32883	-0.829649	-0.409272	-0.942065	-0.210913	-1.15318	-1.24334	-0.727717	-0.482089	-0.647518	-0.635201	-0.82654	-0.720421	-0.8757	-0.171758	-0.321136	-0.845805	-1.10868	-0.715356	-0.423074	-1.1205	-1.07321	0.835898	-0.17095	-0.953882	-1.1993	-1.22233	-0.990968	-0.454533	-0.906175
ACCGTTCCATAGCACT-1_1	Cancer_HGSOC1	3905	1559	8.55314	NA	NA	5	5	0.230769	Singlet	Tumor	NK_cell	CD8T	-1.08708	-0.693479	0.249371	-0.421277	-1.04493	-0.544854	-1.31844	-0.582525	0.551037	-0.605489	-0.761032	-0.522159	-0.408675	-0.604911	-0.420508	-0.428952	-0.90113	-0.805982	-0.383932	-0.731807	0.326354	-0.308408	-0.27188	-0.627882	-0.243281	0.0903467	-0.738811	-0.792712	0.491608	-0.249018	-0.868062	-0.599775	-0.601472	-0.120163	-0.813019	-0.685965
ACCGTTCCATCTGCGG-1_1	Cancer_HGSOC1	12528	3321	7.39144	NA	NA	3	3	0.216622	Singlet	Tumor	NK_cell	NK	-0.821427	0.419513	1.70572	0.463092	-0.592296	0.760316	-0.1768	0.596078	0.435897	0.355269	-0.527475	1.18766	0.797786	0.306834	-0.426969	0.422734	0.47057	0.370709	0.531086	0.278532	-0.393041	0.927787	0.590093	1.44277	-0.628459	0.334023	2.79632	2.29037	-0.38104	0.774336	0.577653	0.826471	0.893804	1.59431	-0.530603	0.163037
ACCGTTCTCAGACTGT-1_1	Cancer_HGSOC1	2019	1082	15.3046	NA	NA	4	4	0.225464	Singlet	Tumor	NK_cell	T	0.328262	-0.878322	-0.0142934	-0.925937	-0.384853	0.333704	0.736645	-0.559444	-0.596688	-0.765505	-0.339144	-0.735534	-0.983321	-0.652054	-0.385061	-0.352581	-0.671221	-1.17359	-0.448733	-1.02973	0.785233	-0.273874	-0.927197	-0.536821	0.241696	-0.0379438	-1.14863	-0.482835	0.604206	-0.400843	-0.0555015	-1.25536	-0.990368	-0.313121	-0.35878	-0.531053
ACCGTTCTCTGCCTGT-1_1	Cancer_HGSOC1	4080	1718	8.79902	NA	NA	3	3	0.209549	Singlet	Tumor	NK_cell	NK	-0.548006	-0.512225	0.376215	-1.05636	-0.157099	-0.713684	0.644766	-1.03164	-0.327531	-1.01687	-0.453947	-0.920025	-0.582463	-0.487445	-0.921873	-0.677641	-0.390699	-0.812742	-0.241977	-0.958773	0.919729	-0.502462	-0.153557	-0.00129081	-0.947229	-0.0165386	-0.811856	-0.553703	0.107578	-0.567393	-0.356418	-0.763828	-0.754673	-0.314044	-0.024023	-0.558861
ACCTACCAGCCTCAAT-1_1	Cancer_HGSOC1	4784	2022	9.51087	NA	NA	3	3	0.183024	Singlet	Tumor	NK_cell	NK	-1.48004	-0.700179	0.219696	-1.33466	-1.12613	-0.471713	1.75663	-0.368236	-0.027461	-1.04736	-0.763939	-0.150821	-0.431996	-0.220903	-0.528596	-0.509525	-0.383876	-0.44491	0.0708277	-0.821372	0.914738	-1.23488	-0.793884	0.789855	-0.842701	-0.542471	-0.481096	-0.0984198	0.739571	0.0316125	0.357148	-0.812535	-0.591903	-0.596329	-0.435915	-0.821206
ACCTACCAGGGTGGGA-1_1	Cancer_HGSOC1	3758	1644	4.47046	NA	NA	5	5	0.221927	Singlet	Tumor	T_cells	CD8T	0.244324	-0.711969	0.298359	-0.852223	-0.79347	-0.00305158	-1.47842	-0.804045	-0.0274502	-1.05934	-0.858515	-0.227388	-0.678162	-0.680086	-0.464173	-0.66536	-0.667251	-0.843148	-0.620433	-0.446649	-0.77647	-0.826816	-0.718416	-0.167439	-0.676868	-0.616345	-0.271814	-0.382879	0.12332	-0.00468303	-0.278691	-0.3322	-0.461378	0.0816702	-0.685023	-0.963691
ACCTACCAGGTGGTTG-1_1	Cancer_HGSOC1	1158	646	15.544	NA	NA	4	4	0.196286	Singlet	Tumor	NK_cell	T	-0.191189	-1.18483	-1.04146	-1.40266	-0.751336	-0.945957	-0.738848	-1.46858	-0.136174	-1.1534	-0.76623	-1.06222	-1.32388	-0.959408	-0.754757	-1.00954	-1.0607	-1.16361	-0.89923	-1.04829	-1.04534	-0.880264	-1.47144	-1.74667	-1.33885	-0.778168	-1.22752	-1.17297	0.66843	-0.935533	-1.08536	-1.34297	-1.50895	-1.13946	-1.07978	-1.17762
ACCTACCAGTTGTAAG-1_1	Cancer_HGSOC1	35346	5855	24.014	NA	NA	0	0	0.324492	Singlet	Tumor	Epithelial_cells	epithelial	-0.536083	1.28244	0.0374903	1.29379	0.187349	1.72432	1.06957	1.67988	0.0396267	0.891865	0.567435	-0.160999	1.22631	0.853017	0.214386	1.6489	1.4215	0.896515	0.843223	0.973383	1.21901	1.18639	0.608795	0.47593	0.4856	0.0505619	0.340647	0.913681	-1.30289	-0.915074	1.17466	0.865578	1.05258	2.08517	2.13648	0.652671
ACCTACCCACAGACGA-1_1	Cancer_HGSOC1	4108	1635	6.06134	NA	NA	5	5	0.217507	Singlet	Tumor	T_cells	CD8T	-0.167681	-0.68838	0.637979	-0.21987	-1.08884	-0.198656	1.13688	-0.48696	-0.342846	-0.168731	-0.735447	0.453258	-0.374942	-0.582965	-0.409497	-0.318251	-0.460762	-0.39755	-0.212856	-0.541084	-0.22099	-0.585855	0.115606	-0.747068	-0.078916	-0.274719	-0.958548	-0.689167	0.711917	-0.398795	-0.116893	-0.425571	-0.764257	-0.928528	-0.8807	-0.57112
ACCTACCGTGCAATAA-1_1	Cancer_HGSOC1	5756	2394	4.82974	NA	NA	3	3	0.153846	Singlet	Tumor	NK_cell	NK	-1.1485	-0.233259	1.31083	0.0590428	-0.555688	-0.571457	-0.0176698	0.12638	0.321323	-0.949305	-0.366797	0.181217	-0.249275	-0.108363	-0.31586	-0.487267	-0.140928	-0.568836	0.0810704	-0.281145	0.486543	-0.0663183	0.00481424	1.99069	-0.0356965	-0.488464	-1.18023	0.301564	0.158516	0.937049	0.31604	-0.27296	-0.202322	-0.546839	-0.340172	-0.677557
ACCTGAAAGCTTAAGA-1_1	Cancer_HGSOC1	5837	1777	20.7298	NA	NA	1	1	0.322723	Singlet	Tumor	Monocyte	myeloid	0.457478	-0.522661	-0.272096	-0.466519	-0.12782	-0.244292	-0.329533	0.1806	-0.901179	-0.588931	0.524381	-0.0942602	-0.74485	-0.47687	-0.170837	-0.492081	-0.558006	-0.694744	-0.289156	-0.648503	0.541701	-0.00796768	0.112669	-0.450255	0.748468	1.13423	-0.480111	-0.452537	0.898728	0.68716	-0.0714834	-0.797627	-0.592964	-0.267679	-0.110172	0.443661
ACCTGAACATTGCTTT-1_1	Cancer_HGSOC1	9751	2877	7.12747	NA	NA	2	2	0.23519	Singlet	Tumor	T_cells	CD4T	-0.0641698	0.135632	1.18191	0.0333657	0.357314	-0.428906	2.12443	0.376571	-0.239553	-0.0269275	-1.0164	0.284234	0.489579	0.105029	-0.406963	-0.065844	0.228726	-0.0759852	0.456601	0.179815	-0.425197	0.587082	0.17725	1.52154	1.41593	0.986485	0.763335	0.78087	-0.41853	0.557541	0.148006	0.316528	0.496361	-0.615948	-0.243524	-0.232981
ACCTGAAGTAGGATAT-1_1	Cancer_HGSOC1	8055	2407	19.2551	NA	NA	0	0	0.310345	Singlet	Tumor	Epithelial_cells	epithelial	0.725	0.281715	-0.68824	0.815601	0.263626	0.584927	0.548469	-0.0950235	0.331452	-0.311813	0.910651	0.0373521	-0.184943	-0.138944	0.544669	0.842186	0.756553	-0.205425	-0.856307	0.273317	-0.386305	-0.268237	0.197532	0.182543	-0.580361	-0.792072	-0.659606	-0.100562	0.824074	0.030701	0.157603	0.0145084	-0.265407	0.439441	0.910541	0.318067
ACCTGAATCAAAGAAC-1_1	Cancer_HGSOC1	29893	5250	7.84799	NA	NA	1	1	0.285588	Singlet	Tumor	Monocyte	myeloid	-0.49829	1.98533	1.49411	1.61164	0.924327	1.04714	0.367492	2.05976	-0.0160464	2.02879	1.2309	2.14106	1.21739	0.496392	0.0556228	0.739824	0.561873	1.38649	0.810647	1.0338	1.54838	1.98136	1.99038	2.30612	2.32095	2.82787	1.55031	2.02014	-1.39409	2.32887	1.60024	1.49256	1.17043	0.427103	0.0893207	0.911657
ACCTGTCAGGTCGTCC-1_1	Cancer_HGSOC1	16837	3956	6.85989	NA	NA	1	1	0.270557	Singlet	Tumor	Macrophage	myeloid	-0.270556	0.811096	1.14778	0.194794	-0.162933	0.484387	0.855774	0.754308	1.17561	0.416844	1.19725	1.43826	0.585408	0.254252	-0.584609	0.133101	0.401305	0.271474	0.478703	0.366254	1.53117	1.26886	0.287461	0.443112	1.47258	2.03789	0.435705	1.03428	-1.38602	1.34024	0.554	0.73088	0.819517	0.196717	0.0216853	0.0927052
ACCTGTCGTTATAGAG-1_1	Cancer_HGSOC1	7310	2936	7.90698	NA	NA	11	11	0.227233	Singlet	Tumor	Endothelial_cells	endothelial	0.068766	0.0733801	-0.805868	-0.26663	0.336043	1.0982	0.719165	0.634303	-0.694105	-1.01561	1.3437	-0.205019	-0.456436	-0.325061	0.889612	0.574013	-0.0938232	0.00407074	-0.031216	-0.436276	1.75416	0.815841	0.442392	0.0884446	0.221825	-0.19475	-0.591367	-0.655803	-0.981236	0.789403	0.979097	-0.00801715	-0.119193	-0.280808	1.3235	-0.697182
ACCTGTCGTTGCACGC-1_1	Cancer_HGSOC1	3820	1810	19.1623	NA	NA	7	7	0.198055	Singlet	Tumor	NK_cell	CD8T	-0.762563	-0.548809	-0.262009	-0.565004	-1.09678	-0.156962	0.417661	-0.0854931	0.329445	-0.443637	-0.743961	-0.374309	-0.254561	1.38961	-0.707954	-0.109865	-0.163773	-0.57672	1.19606	-0.608979	-0.0573797	-0.0717954	-1.2006	-0.869907	-1.27943	-0.0106251	-0.148694	0.228868	0.884218	-0.476051	0.737286	-0.604566	-0.440815	-0.226084	-0.845461	-1.76941
ACCTGTCTCCGTGTCT-1_1	Cancer_HGSOC1	3688	1543	5.99241	NA	NA	0	0	0.312997	Singlet	Tumor	Epithelial_cells	epithelial	1.03022	0.515192	-0.854305	-0.260426	0.0537452	-0.192095	0.465702	-0.0147746	-0.779911	-0.0521121	-0.325159	-0.557799	-0.39797	-0.397484	-0.360261	0.309276	0.302453	0.073617	-0.0911694	0.234434	0.382412	0.222334	-0.324157	-1.54419	-0.694997	-0.846681	-0.145443	-0.486903	1.21911	-1.2249	-0.103423	-0.757271	-0.0664538	-0.153858	0.151492	1.334
ACCTGTCTCGTCGATA-1_1	Cancer_HGSOC1	7411	2564	6.15302	NA	NA	5	5	0.219275	Singlet	Tumor	T_cells	CD8T	-0.569176	0.16975	1.19266	-0.0987754	-0.431507	-0.142603	-0.00381749	0.296549	1.32932	-0.363107	-0.736833	0.601118	0.395817	-0.183918	-0.437576	-0.27907	-0.198063	0.226359	-0.13202	-0.562893	-0.804147	0.25059	-0.0784479	1.30019	0.852119	-0.329074	-0.140265	0.434631	-0.339597	0.264727	0.696895	-0.0668075	0.159215	0.35621	-0.239392	0.255682
ACGATCAAGACCTGGA-1_1	Cancer_HGSOC1	2216	1140	10.3339	NA	NA	2	2	0.178603	Singlet	Tumor	T_cells	CD4T	-0.679316	-0.922985	-0.488548	-0.783817	-0.43273	-0.542674	-0.0969716	-0.430537	-0.288287	-0.860918	-0.835254	-0.619035	-1.08098	-0.634382	-0.262699	-0.124972	-0.38228	-1.1931	-0.314306	-1.22588	-0.0136832	-0.281076	-0.419626	0.396861	-0.03284	-0.0927817	-1.10518	-0.739802	0.42675	0.569019	-0.420991	-1.10444	-0.955901	-0.52338	-0.519981	-0.745272
ACGATCAAGCACTAGG-1_1	Cancer_HGSOC1	65547	6992	16.5896	NA	NA	0	0	0.312997	Singlet	Tumor	Epithelial_cells	epithelial	-0.820253	2.27674	-0.783914	1.79599	1.51945	2.04732	2.61974	1.68362	1.35767	2.59493	1.53808	0.898879	1.75889	1.10137	-0.168155	2.73429	2.79971	1.95181	1.33402	1.60048	1.06352	2.66731	1.4905	1.1812	0.401287	-0.511239	0.372232	0.502296	0.124727	-0.436315	1.91024	1.76062	1.78329	2.57314	1.97804	0.937064
ACGATCACATGACGAG-1_1	Cancer_HGSOC1	12518	2892	14.4272	NA	NA	8	8	0.286472	Singlet	Tumor	Macrophage	B	0.729917	0.0050024	0.993951	-0.058224	-0.236291	0.658509	-0.271782	0.835884	0.0617216	0.00996598	1.0462	0.733818	-0.135543	-0.366604	-0.122877	0.139681	0.158278	0.0826949	0.340404	0.053472	1.37546	0.305415	1.47361	1.72532	2.15448	2.40681	0.102603	0.389762	-0.143133	2.6793	0.575366	0.414176	-0.187875	0.0756608	0.13223	2.4106
ACGATGTAGGGAGATA-1_1	Cancer_HGSOC1	3482	1627	8.67318	NA	NA	3	3	0.22458	Singlet	Tumor	NK_cell	NK	0.347786	-0.550319	1.0742	-0.532919	0.601205	-0.687119	-0.093462	-0.901401	-1.00467	-0.534801	-0.797038	-0.621461	-0.64018	-0.416079	-0.334089	-0.494547	-0.581029	-0.654465	-0.448362	-0.949565	-0.294457	-0.393382	-0.331928	-0.0481305	0.035336	-0.00389979	-0.639638	-0.515084	0.696398	-0.298095	-0.79224	-0.291715	-0.120971	-0.426675	-0.799379	-1.39733
ACGATGTAGGGTATAT-1_1	Cancer_HGSOC1	6341	2111	22.0785	NA	NA	9	9	0.333333	Singlet	Tumor	DC	CD8T	0.324175	-0.622485	1.32673	-0.379641	-1.1128	0.377237	-0.541665	0.268291	-1.43877	-0.304341	0.462782	0.603246	-1.15647	-0.602133	-0.153168	0.380988	-0.329481	-0.767823	-0.000947855	-1.14287	2.10051	0.177735	-0.199986	0.420537	1.97192	1.7651	0.815772	1.65558	0.779962	1.04591	0.25269	-0.0720841	-0.664875	-0.666494	0.240883	-0.583322
ACGCACGCAGGACGAT-1_1	Cancer_HGSOC1	3101	1403	21.8962	NA	NA	3	3	0.212202	Singlet	Tumor	NK_cell	NK	0.128423	-1.17168	-0.226689	-0.242098	0.43188	-0.811281	2.58252	-0.410279	-0.00421349	-0.570672	-0.501206	-0.934726	-0.911622	-0.401325	-0.772841	-0.359738	-0.62954	-0.674728	-0.63344	-1.0465	-0.492982	0.0842399	-0.261568	0.00973373	-0.0153832	-0.389867	-1.05542	-0.818787	0.590823	-0.136821	-0.258314	-0.962331	-0.670291	-0.593736	0.22509	-0.858931
ACGCACGGTTATTCCT-1_1	Cancer_HGSOC1	93400	8214	17.3908	NA	NA	0	0	0.297966	Singlet	Tumor	Epithelial_cells	epithelial	0.76982	2.08892	-0.180596	2.55485	1.23267	2.68705	3.30268	2.06317	0.74806	2.7427	1.54882	1.74625	1.73918	2.04694	0.472417	3.46131	3.55443	2.0748	2.39676	2.10532	1.74872	2.13448	1.75088	1.81214	1.19268	0.737226	0.27366	0.795838	-1.25512	-0.490498	3.22814	2.18858	1.89177	2.66372	2.16284	2.27721
ACGCACGTCACCTTAT-1_1	Cancer_HGSOC1	36519	6877	15.8137	NA	NA	0	0	0.300619	Singlet	Tumor	Epithelial_cells	epithelial	1.35752	1.42489	-1.11591	1.68956	1.27495	1.75297	0.647444	1.4205	2.56968	1.5781	1.73849	1.11347	1.09285	0.774563	-0.405168	2.63534	2.28078	0.843423	1.17117	0.607053	1.6473	2.99263	1.23398	0.308036	-0.0273829	-0.825015	-0.0048871	0.230479	-0.76847	0.191647	2.23632	1.10369	1.01467	0.534765	2.46486	1.70776
ACGGAAGCAATGAGCG-1_1	Cancer_HGSOC1	5435	1554	18.4545	NA	NA	1	1	0.293546	Singlet	Tumor	Macrophage	myeloid	0.150252	-0.692558	0.561603	-0.703839	1.32334	-0.601956	-0.429708	0.291049	-0.151753	-0.19976	0.208431	0.228767	-0.383908	-0.675975	-0.268379	-0.383469	-0.446759	-0.840354	-0.626942	-0.841948	-0.0631464	-0.0107049	-0.329576	0.285439	0.164644	1.36923	-0.835835	-0.586581	0.158166	0.508598	-0.435882	-0.553979	-0.697118	-0.474383	-0.314942	1.17397
ACGGAAGCACCTGATA-1_1	Cancer_HGSOC1	5187	1674	20.1658	NA	NA	1	1	0.290009	Singlet	Tumor	Macrophage	myeloid	-0.184846	-0.6844	0.537493	-0.425415	-0.326603	-0.558724	-0.808126	0.089304	-0.134104	0.290691	-0.0110907	0.377194	-0.692567	-0.39585	-0.488179	-0.526738	-0.129199	-1.17678	-0.504435	-0.979231	0.953873	-0.3013	-0.214104	0.309373	1.87246	2.27291	-0.73243	-0.24455	0.658419	1.46847	0.168658	-0.567772	-0.970822	-0.744434	0.0739975	0.674524
ACGGGTCCAATGGGTG-1_1	Cancer_HGSOC1	9225	2852	17.2791	NA	NA	1	1	0.335102	Singlet	Tumor	NK_cell	myeloid	-0.599943	-0.315114	1.64783	-0.32801	-0.0273925	-0.131721	1.92689	0.397972	-0.885237	-0.097524	0.109946	1.10915	-0.179769	-0.0381915	-0.157284	0.145239	-0.160756	0.0605409	0.328054	-0.435473	1.21252	0.592156	0.587649	1.27018	1.7001	1.86298	0.886314	1.1266	0.278289	1.09744	0.722133	-0.140882	-0.456882	0.169585	0.547417	0.687727
ACGGGTCCACAATCTG-1_1	Cancer_HGSOC1	17222	3707	10.3821	NA	NA	1	1	0.30504	Singlet	Tumor	Macrophage	myeloid	1.25033	1.05507	1.6518	0.314172	1.18741	1.18978	0.25981	1.11157	0.825467	0.917819	1.42633	3.06656	0.467616	-0.165749	0.0923674	0.056104	0.522143	0.253347	0.154477	0.252009	1.54541	0.875077	0.93114	1.0618	2.72061	2.5976	-0.237588	1.00788	-1.20692	2.42363	1.12767	0.911249	0.327517	-0.261109	0.139124	2.47501
ACGGGTCGTACCTAAC-1_1	Cancer_HGSOC1	2274	1283	7.21196	NA	NA	5	5	0.198055	Singlet	Tumor	T_cells	CD8T	-0.0658592	-1.08048	0.567593	-1.15496	-0.499394	-0.946884	-0.728476	-0.531124	-1.45701	-0.834743	-0.809953	-0.586744	-1.06636	-0.49426	-0.684291	-0.916012	-0.788383	-1.24078	-0.25412	-0.938439	0.02597	-0.764858	-0.969704	-0.59739	0.1274	-0.270369	0.598513	0.464749	0.74149	0.162787	-0.0586524	-0.727949	-0.740828	-0.774899	-0.710927	0.245868
ACGGGTCGTACTGTTG-1_1	Cancer_HGSOC1	28265	3970	1.86096	NA	NA	0	0	0.250221	Singlet	Tumor	Epithelial_cells	epithelial	-0.0595812	0.683652	-1.03164	0.644993	0.233425	-0.0130315	-1.05073	0.0182218	-0.808449	0.456369	-0.336196	-0.438461	1.00825	1.02974	-0.536544	0.248306	-0.068924	0.195041	0.932049	0.46215	0.137771	0.827765	0.164207	-0.204093	0.164803	-0.62481	-0.494259	-0.648895	-1.60208	-1.02181	-0.183738	1.47789	1.62967	2.05331	-0.812082	0.161198
ACGGGTCGTAGCACGA-1_1	Cancer_HGSOC1	17047	3278	0.838857	NA	NA	0	0	0.318302	Singlet	Tumor	Epithelial_cells	epithelial	1.68089	0.84733	-1.13213	-0.114187	-1.04724	-0.363912	0.141506	-0.351847	0.914134	0.614533	0.630071	-0.388261	1.01303	0.620785	-0.755639	0.480072	0.867232	1.03536	0.301264	0.722452	-0.857563	0.366856	-0.43399	-1.24081	-1.8712	-1.06376	-1.20346	-1.21921	-1.00922	-1.74149	-0.0448069	0.675301	1.1184	0.509577	0.554495	0.416629
ACGGGTCGTCGTGGAA-1_1	Cancer_HGSOC1	2707	1236	20.1699	NA	NA	3	3	0.204244	Singlet	Tumor	NK_cell	NK	-0.258481	-0.858595	-0.588708	-0.551851	-0.489363	-0.941797	-1.15605	-1.10138	-1.37036	-0.939483	-1.05007	-0.712082	-1.07565	-0.401009	-0.723107	-0.812781	-1.06065	-0.402292	-0.799683	-0.822284	-0.937204	-0.717605	-0.618459	-0.0842291	-1.32698	-0.406584	-1.03065	-0.918966	0.275354	-0.721479	-0.239625	-0.968308	-0.781773	-0.388862	-0.327213	-1.21421
ACGGGTCTCGAAACAA-1_1	Cancer_HGSOC1	12041	3077	7.48277	NA	NA	3	3	0.189213	Singlet	Tumor	NK_cell	NK	0.130623	-0.158497	1.3359	0.736937	-0.180831	0.0793927	0.834971	0.516492	0.439786	-0.0360121	-0.50622	-0.172387	0.415121	0.132074	-0.379984	0.268393	0.429108	-0.135036	0.0685986	-0.148165	-0.0753488	0.162236	0.00327705	1.68273	0.107309	0.480589	-0.486838	-0.0288189	-1.22037	-0.0760681	0.274881	0.68819	0.736975	0.605913	-0.332333	0.100409
ACGGGTCTCGGTCTAA-1_1	Cancer_HGSOC1	1469	726	3.74404	NA	NA	3	3	0.250221	Singlet	Tumor	NK_cell	NK	-0.469442	-0.954093	-0.991031	-1.25352	-0.48457	-1.0685	-1.00658	-1.20914	-0.543579	-0.11448	-0.402641	-0.897099	-0.805923	-0.861695	-0.541377	-0.699112	-0.717938	-0.530522	-0.961957	-0.912676	-0.344279	-1.20744	-0.771797	-1.0282	-0.886117	-0.767864	-1.64931	-1.4854	0.654242	-1.33972	-1.3693	-1.18973	-0.971677	0.09463	-0.916149	0.574502
ACGGTCGGTCACAGTT-1_1	Cancer_HGSOC1	19722	4515	6.37866	NA	NA	7	7	0.197171	Singlet	Tumor	NK_cell	CD8T	-1.59406	0.664346	1.40977	1.07496	-0.440446	-0.1398	1.39419	1.03107	-1.91977	0.816849	-0.924168	1.51176	0.52732	2.13807	-0.845895	0.0558467	0.396305	1.4372	3.30902	0.500686	0.563773	0.99866	0.415467	2.2823	0.768807	-0.00745676	0.0658178	1.00452	-1.83974	-0.820878	3.16419	1.31197	0.918448	-0.217809	-0.298594	0.111207
ACGGTCGGTCCACACG-1_1	Cancer_HGSOC1	1486	675	21.1978	NA	NA	4	4	0.218391	Singlet	Tumor	NK_cell	T	0.299213	-1.2047	-1.02277	-0.984579	-0.760186	-0.807068	-0.619948	-0.860023	-1.10838	-0.53508	-0.530238	-1.39267	-1.2289	-0.604357	-0.589211	-0.616555	-0.656959	-1.11877	-0.617178	-0.734193	0.241386	-0.875228	-1.05857	-0.886313	-0.432978	-0.521693	-1.53801	-1.33057	0.643706	-0.750964	-0.656545	-1.07851	-1.42072	-0.833583	-0.741703	-0.922244
ACGGTCGGTGCCTTCT-1_1	Cancer_HGSOC1	28596	6263	3.89565	NA	NA	0	0	0.303271	Singlet	Tumor	Epithelial_cells	epithelial	-0.668582	1.43444	0.267116	1.29022	1.58305	2.10433	2.06946	1.48962	0.103704	1.06417	1.41417	1.65417	1.14399	0.907288	0.358596	1.67696	1.96897	1.33699	0.710061	1.36543	2.74321	1.81767	1.14134	0.341642	1.32629	0.477908	2.73023	2.2938	-1.25781	0.404284	2.00974	1.48189	1.22704	0.369404	2.08159	0.47772
ACGGTCGGTTATAGAG-1_1	Cancer_HGSOC1	3312	1401	9.69203	NA	NA	3	3	0.208665	Singlet	Tumor	T_cells	NK	-1.11239	-1.02031	-0.0407373	-0.93017	-0.745549	-0.034537	0.123955	-0.77545	-0.0933114	-0.532869	-0.69024	-0.0475419	-0.972418	-0.574284	-0.436058	-0.352246	-0.65548	-1.21365	-0.779208	-0.872228	-0.328224	-0.423983	-0.499607	-1.24563	-0.180869	-0.215544	-1.05451	-0.945327	1.10783	-0.0361386	-0.62415	-1.14972	-0.674356	-0.321187	-0.495211	-1.55492
ACGGTCGTCACGAGGA-1_1	Cancer_HGSOC1	4154	1479	17.5494	NA	NA	3	3	0.179487	Singlet	Tumor	NK_cell	NK	0.734613	-0.744513	0.755101	-0.470496	-0.172111	-0.6208	0.111022	-0.20256	-0.200637	-0.809429	-0.836619	0.102985	-0.564766	-0.233371	-0.172248	-0.558116	-0.684214	-0.920543	-0.566285	-0.900994	-1.05043	-0.969191	-0.70402	-0.150433	0.0147371	-0.341837	-1.189	-0.49534	0.321524	0.500416	-0.277889	-0.774972	-0.475972	-0.589528	-0.196537	-0.328896
ACGGTCGTCCACGGGT-1_1	Cancer_HGSOC1	9697	3266	17.6549	NA	NA	0	0	0.26702	Singlet	Tumor	Epithelial_cells	epithelial	0.0645062	0.23177	-1.08974	0.927379	1.34192	1.1287	2.09987	0.346437	0.545886	-0.375281	0.301956	-0.0512171	-0.0315087	0.242707	-0.223278	0.927086	0.789584	-0.0651832	0.101826	-0.24649	1.15875	-0.129601	-0.214126	-0.521373	-0.755501	-0.457625	-0.688548	-0.51323	-0.594448	-0.408887	0.285446	-0.305325	0.331204	0.771607	0.922983	0.605041
ACGGTCGTCCGTGTCT-1_1	Cancer_HGSOC1	32391	6249	11.7564	NA	NA	0	0	0.298851	Singlet	Tumor	Epithelial_cells	epithelial	1.31769	1.82524	-0.793235	2.00933	0.854578	2.14294	1.48965	1.67805	2.94018	2.33398	0.88756	0.782364	1.53494	1.20347	-0.123288	2.20094	2.16389	2.20534	1.08155	1.23647	2.14988	2.44069	0.673621	-0.187582	1.05996	0.179184	1.155	0.819646	-0.494888	-0.340675	1.86314	1.72962	1.49632	0.862264	1.08976	0.83135
ACGGTCGTCGAGCACC-1_1	Cancer_HGSOC1	2765	1153	7.05244	NA	NA	9	9	0.221927	Singlet	Tumor	NK_cell	CD8T	-0.854033	-0.810549	-0.0859991	-0.640357	-0.764801	-0.940701	-0.387441	-0.449258	-1.07468	-0.7176	-0.737144	-0.506427	-1.1256	-0.870676	-0.503599	-0.604497	-0.598754	-0.606133	-0.448097	-0.841036	-0.338862	-0.714666	-0.327495	0.111962	-0.487854	-0.0775598	1.5126	0.895786	1.39967	-0.368288	-0.701112	-0.625316	-0.956235	-0.664206	-0.75362	-0.214954
ACGGTCGTCTCACCCA-1_1	Cancer_HGSOC1	2542	1148	12.6279	NA	NA	3	3	0.208665	Singlet	Tumor	NK_cell	NK	0.241288	-1.22841	-0.165826	-1.26502	-0.395862	-0.729019	-0.557145	-0.915744	-0.748704	-0.292161	-0.518525	-0.79771	-0.968014	-0.976642	-0.379449	-0.372114	-0.666024	-0.736698	-0.548305	-1.17232	-0.570007	-0.794048	-0.985382	-0.971883	-1.02785	-0.290881	-1.5033	-1.2384	0.580152	-1.0851	-0.987872	-0.884575	-1.17938	-1.06466	-1.10731	-0.631063
ACGGTTAAGCGACCCT-1_1	Cancer_HGSOC1	7328	2665	17.2353	NA	NA	1	1	0.290009	Singlet	Tumor	Macrophage	myeloid	-0.57029	0.13542	0.145858	0.426604	0.312186	0.28983	0.0341273	0.203714	-0.946129	0.0546428	1.71326	1.60092	0.011784	-0.115614	0.0270896	-0.251637	-0.0510608	-0.180803	0.294268	-1.04761	0.541906	0.845012	-0.427323	0.555057	1.48852	0.996748	0.695913	0.4099	0.0271934	1.70783	0.0474362	-0.484061	-0.184999	-0.60048	0.0845247	0.268095
ACGGTTACAGACCAAG-1_1	Cancer_HGSOC1	5395	2311	4.85635	NA	NA	3	3	0.19275	Singlet	Tumor	NK_cell	NK	-1.79099	-0.269425	0.757688	0.275131	-0.925109	0.106483	0.634263	-0.22606	-0.0794038	-0.144975	-0.924969	0.198887	-0.0251185	-0.0497709	-0.515511	0.0795097	-0.149573	-0.277092	-0.107417	-0.316095	-0.85336	-0.774272	-0.0186177	1.16395	0.569961	0.241621	-0.122708	0.234247	0.238374	0.53187	0.0727095	-0.104492	-0.13571	-0.513265	-0.228572	-0.00512076
ACGGTTACAGATGCGA-1_1	Cancer_HGSOC1	4526	1690	5.05966	NA	NA	2	2	0.217507	Singlet	Tumor	T_cells	CD4T	-0.466712	-0.184751	0.220835	-0.781892	-0.886574	-0.609077	-1.15547	-0.753086	0.768836	-0.783866	-0.991202	-0.729294	-0.549322	-0.298526	-0.67586	-0.460293	-0.506474	-1.03436	-0.514059	-0.585234	-0.0308682	-0.0321489	-1.17802	-0.891729	-0.647827	-0.658768	-1.1443	-0.975284	0.741565	0.130934	-0.396302	-0.225583	-0.0742131	-0.294726	-0.917725	0.848792
ACGGTTACATAAGCAA-1_1	Cancer_HGSOC1	8123	2362	6.40158	NA	NA	2	2	0.238727	Singlet	Tumor	T_cells	CD4T	0.0577695	0.264535	0.605444	-0.266358	-0.756764	-0.229942	-0.0911798	-0.263392	-0.597778	-1.15142	-0.734481	-0.578259	-0.206352	-0.0298859	-0.63085	0.072644	-0.247344	-0.0857028	-0.145433	0.178658	-0.232774	0.188784	0.318475	0.595543	0.793168	0.251269	-0.892755	-0.629134	0.204816	0.828894	-0.220759	0.0943436	0.351874	-0.128671	-0.352005	0.233433
ACGGTTAGTCGCAGTC-1_1	Cancer_HGSOC1	3175	1284	13.7638	NA	NA	3	3	0.204244	Singlet	Tumor	NK_cell	NK	-1.03945	-0.807008	0.40428	-0.528845	-0.265092	-0.120832	1.42313	-0.276307	-0.847437	-0.826252	-0.907329	-0.946359	-0.623162	-0.519666	-0.435238	-0.3342	-0.284527	-0.886645	-0.365178	-0.376152	-0.107049	-0.592345	-0.899052	-0.225018	0.0450355	-0.01352	-1.14739	-0.524551	0.867493	0.0897109	-0.593599	-0.558556	-0.658273	-0.592395	-0.285429	-1.02196
ACGGTTAGTGCTCTCT-1_1	Cancer_HGSOC1	4762	1610	14.3007	NA	NA	4	4	0.219275	Singlet	Tumor	T_cells	T	-1.07695	-0.697236	-0.714006	-0.10875	-0.0529094	-0.239543	0.201934	-0.56893	-1.84369	0.726374	-0.377857	-0.462781	-1.09495	-0.499206	-0.296154	-0.310383	-0.439833	-0.388095	-0.382753	-0.504611	-0.974443	-0.510652	-0.114935	-0.500267	0.0656419	-0.298234	-1.17508	-0.548037	-0.0107609	0.368822	-0.294029	-0.415903	-0.762512	-0.0169428	-0.404159	-1.03734
ACGGTTAGTGTGTTTG-1_1	Cancer_HGSOC1	8965	2903	15.9621	NA	NA	1	1	0.265252	Singlet	Tumor	Macrophage	myeloid	0.362874	0.0251868	1.02834	-0.0528842	0.353466	0.238923	-0.217542	1.57043	-1.39011	0.829562	1.42228	1.93305	-0.261344	-0.252036	0.0894456	0.014182	0.0346543	-0.0445541	-0.369118	-0.0193738	1.38373	0.3656	0.359632	0.904371	1.57112	2.20597	0.299192	0.515049	-0.569461	3.08878	0.0794893	0.191822	-0.179333	-0.144958	0.844272	-0.16456
ACGGTTATCAAATGCC-1_1	Cancer_HGSOC1	4339	1858	6.70661	NA	NA	5	5	0.236958	Singlet	Tumor	T_cells	CD8T	-0.292849	-0.169451	0.664762	-0.39733	-0.34378	-0.731203	-0.783199	0.00959856	-0.166543	-0.828263	-0.86007	-0.17971	0.115943	-0.1967	-0.524111	-1.11153	-0.599589	-0.909279	0.178902	-1.21399	-1.64202	-0.393898	-1.03255	0.0520582	0.251184	0.0798776	0.0668234	0.306985	0.190378	0.0926754	-0.229313	-0.526395	-0.156542	-0.584928	-0.835146	-0.0886103
ACGTAACAGATTGATG-1_1	Cancer_HGSOC1	1353	842	10.2735	NA	NA	4	4	0.201592	Singlet	Tumor	NK_cell	T	-0.366521	-1.42029	-1.09219	-0.702616	-0.40559	-1.10619	-1.05122	-1.11774	-0.825033	-0.829536	-0.419422	-0.743668	-1.0768	-1.07233	-0.418449	-0.451572	-0.654415	-1.50014	-0.841434	-1.34095	-1.12106	-0.8739	-0.998945	-0.679611	-0.970227	-0.521389	-1.678	-1.18357	1.29939	-0.326973	-0.887683	-1.26482	-1.53236	-0.717087	-0.814141	-0.821949
ACGTAACAGTACCGGA-1_1	Cancer_HGSOC1	4596	1841	8.33333	NA	NA	3	3	0.221927	Singlet	Tumor	NK_cell	NK	0.504711	-0.609825	0.0165841	-0.191449	-0.817807	-0.46676	0.476505	-0.468773	0.0772841	-0.759459	-0.904976	-0.23273	-0.141467	-0.436676	-0.470526	-0.569122	-0.391884	-0.466538	-0.757846	-0.541231	-0.763743	-0.0551403	-0.245267	-0.138525	-0.0392147	0.0690146	-0.659945	-0.530813	0.29291	0.720846	-0.697071	-0.389297	-0.0973204	0.320907	-0.569511	-0.772956
ACGTAACCACAAATAG-1_1	Cancer_HGSOC1	4541	1981	12.1779	NA	NA	3	3	0.213086	Singlet	Tumor	NK_cell	NK	-1.02213	-0.537462	1.43038	-0.0250918	-0.805007	0.123903	0.932137	-0.322775	-1.20604	-0.228834	-0.614669	0.276828	-0.492908	-0.345946	-0.323908	-0.384735	-0.7953	-0.263155	-0.506749	-0.354267	-0.124727	-0.861525	0.327302	1.18966	0.954457	0.198861	-0.806491	-0.289563	0.525878	0.415718	-0.0519777	0.19112	-0.351758	-0.12245	-0.0821858	-1.33638
ACGTAACCATGGGAAC-1_1	Cancer_HGSOC1	3573	1723	4.39407	NA	NA	5	5	0.242263	Singlet	Tumor	NK_cell	CD8T	-0.1042	-0.766747	0.180512	0.0769405	-0.514026	-0.257849	0.164731	-0.411565	-0.207555	-0.470715	-0.364916	0.131429	-0.5188	-0.336807	-0.495958	-0.838306	-0.731239	-0.480945	-0.465918	-0.74902	-1.23818	-0.334234	-0.815076	-0.270348	-0.660084	-0.102941	-0.896775	-0.459171	0.235797	-0.472848	-0.414418	-0.219722	-0.60979	-0.603398	-0.770521	0.0368949
ACGTAACGTACCCGAC-1_1	Cancer_HGSOC1	63039	7733	24.3659	NA	NA	0	0	0.321839	Singlet	Tumor	Epithelial_cells	epithelial	-0.0987435	1.59409	-1.12555	1.61202	1.37585	2.09323	-0.371321	1.76159	0.490967	1.46531	0.94642	1.21475	1.56596	1.20816	0.020074	2.75884	2.41887	1.63875	1.3779	0.687786	0.805843	1.93498	1.26022	0.897269	0.789625	0.20838	0.796313	0.887477	-1.08543	-0.682198	2.39613	1.20935	1.31131	1.79381	1.98083	0.294285
ACGTAACGTGTCATGT-1_1	Cancer_HGSOC1	3460	1422	8.90173	NA	NA	5	5	0.221043	Singlet	Tumor	T_cells	CD8T	-0.19964	-0.713743	0.192529	-1.09216	-0.549973	-0.827823	-0.435465	-1.0956	-0.314034	-0.889855	-1.04965	-0.879815	-0.742058	-0.579118	-0.380444	-0.352134	-0.510578	-0.32866	-0.611358	-0.163934	-0.641505	-0.955952	-0.355543	-0.458399	-0.919128	-0.206938	-0.607877	-0.564203	0.349161	-0.0696177	-0.741779	-0.599959	-0.513096	-0.566893	-0.392177	-0.820293
ACGTAACTCCTTATCA-1_1	Cancer_HGSOC1	4544	1843	10.4974	NA	NA	2	2	0.217507	Singlet	Tumor	T_cells	CD4T	-0.138031	-0.356331	1.1498	0.00788243	-0.857109	-0.790347	1.14149	-0.227508	0.17341	-0.373752	-0.276579	-0.0814188	-0.276878	-0.381672	-0.336282	-0.362724	-0.474753	0.210066	-0.276694	-0.230468	0.103433	-0.090755	0.0351645	1.16802	0.397618	0.247964	-0.703629	-0.0273978	0.364086	0.748053	-0.107731	-0.225972	-0.612148	-0.918838	-0.149224	-0.748664
ACGTAACTCGAGATAA-1_1	Cancer_HGSOC1	3494	1574	9.33028	NA	NA	3	3	0.196286	Singlet	Tumor	NK_cell	NK	-1.26527	-0.741401	0.829403	-0.585323	-0.209597	-0.662671	0.924921	0.299043	-1.04421	0.161873	-0.842925	-0.223673	-0.283548	-0.531033	-0.229834	-0.618666	-0.688853	-0.551647	-0.507693	-0.839344	-0.31847	-0.34321	-0.207143	0.518361	-0.363165	-0.0812374	-0.658983	-0.745474	0.577617	0.388398	-0.672449	-0.376532	-0.698824	0.24151	-0.730206	-0.56931
ACGTAACTCGTCGATA-1_1	Cancer_HGSOC1	4773	1879	7.35387	NA	NA	2	2	0.209549	Singlet	Tumor	T_cells	CD4T	-1.62281	-0.664633	0.439361	-0.174734	-0.269902	0.321832	0.643035	-0.30117	-1.38134	-0.105211	-0.212344	-0.199975	-0.267072	-0.573131	-0.347153	-0.0721595	-0.580859	-0.631048	-0.0498312	-0.736022	-0.228301	-0.00262811	-0.60017	0.126505	-0.188872	0.00529711	-0.988516	-0.855783	-0.174479	0.43844	0.292813	-0.401503	-0.304918	-0.529417	-0.158553	0.487145
ACGTACAAGAGTCAGC-1_1	Cancer_HGSOC1	3421	1614	12.9494	NA	NA	3	3	0.207781	Singlet	Tumor	NK_cell	NK	-0.635449	-0.995266	0.0545538	-0.466326	-0.205905	-0.47301	-0.28038	-0.635113	-0.758571	-1.04105	0.250636	-0.379696	-0.628327	-0.388868	-0.558401	-0.740346	-0.68618	-1.19197	-0.346227	-0.66373	-1.53348	-0.417409	-0.827952	-0.130433	-0.740933	-0.803133	-1.26285	-0.669254	-0.169778	0.347272	0.0562552	-1.22717	-0.668598	-0.835078	-0.888861	-1.07297
ACGTACAAGATTGACA-1_1	Cancer_HGSOC1	27589	5413	24.0386	NA	NA	0	0	0.318302	Singlet	Tumor	Epithelial_cells	epithelial	-0.169053	1.27734	-0.563162	2.07463	0.562545	2.05987	0.917193	1.64944	0.0501992	1.87694	1.07774	0.328313	0.599589	0.921287	-0.351396	1.82156	2.27135	0.374049	1.02173	0.939886	1.1682	1.98986	0.837111	1.12481	0.378458	-0.0417927	0.420521	0.786988	0.974542	0.311928	1.50648	0.963723	1.04123	0.177068	1.15773	1.54568
ACGTACAAGTGCCAGA-1_1	Cancer_HGSOC1	3766	1286	24.2167	NA	NA	4	4	0.207781	Singlet	Tumor	Epithelial_cells	T	0.720478	-1.01144	-1.5651	-0.949268	-0.273486	-0.880167	-1.26747	-0.945456	0.504692	-0.464756	-0.586618	-1.63338	-0.878091	-0.517835	-0.377917	-0.503217	-0.656966	-1.04377	-0.718187	-0.601919	0.302415	-0.507903	-0.742584	-1.66901	-1.87486	-1.35875	-1.56246	-1.7723	0.436265	-1.08096	-0.0468455	-1.2628	-1.01182	-0.1603	-0.241941	0.00105234
ACGTACACAATCGAAA-1_1	Cancer_HGSOC1	5615	2128	6.30454	NA	NA	5	5	0.236958	Singlet	Tumor	T_cells	CD8T	-0.903261	-0.0297291	1.26271	-0.343024	-0.552011	-0.571572	0.779123	0.265683	0.544466	-0.277425	-1.06317	0.0951688	-0.0812675	0.322	-0.191103	-0.455696	-0.556363	-0.600358	-0.225201	-0.482803	-0.599852	0.386335	0.0775646	1.09847	0.178752	-0.104262	-0.797302	-0.0248906	0.151017	0.0761942	-0.245451	-0.0416041	-0.190222	0.0655973	-0.605053	-1.05263
ACGTACACATCTGTTT-1_1	Cancer_HGSOC1	2095	1101	13.0788	NA	NA	4	4	0.198055	Singlet	Tumor	T_cells	T	0.216269	-1.09036	-0.839717	-1.24485	-0.0682374	-1.15737	-0.406338	-1.00623	0.133904	-0.720898	-0.559585	-1.17654	-0.944778	-0.836583	-0.502262	-0.22165	-0.276999	-0.978302	-0.802455	-1.30464	-0.0223112	-1.02021	-0.75536	-1.02724	-0.320357	-0.552103	-1.08145	-0.967093	0.6548	0.0680203	-0.381669	-0.920024	-1.44198	-0.684511	-0.691952	-1.39275
ACGTACACATTAAGCC-1_1	Cancer_HGSOC1	1986	1016	15.6596	NA	NA	4	4	0.206897	Singlet	Tumor	NK_cell	T	-0.0156779	-0.99766	-0.238858	-0.837737	0.213199	-0.549895	-0.0767153	-0.849056	0.925125	-0.263149	-0.764386	-0.844561	-1.24549	-0.943581	-0.572088	-0.772641	-0.845062	-1.07663	-0.908379	-0.900772	0.40574	-0.494883	-0.658921	-0.493808	-0.710219	-0.648338	-0.646241	-0.784026	0.446806	0.417758	-0.973244	-1.09603	-1.30667	-1.10253	-0.633605	-0.726061
ACGTACAGTAAGGTCG-1_1	Cancer_HGSOC1	5197	2066	22.1666	NA	NA	0	0	0.243148	Singlet	Tumor	Epithelial_cells	epithelial	0.519085	-0.6943	-1.07572	-0.194861	1.17975	0.18232	0.243067	-0.671693	0.342827	-0.0321169	0.466309	-0.863814	-0.654092	-0.218879	-0.012683	-0.29281	-0.184323	-0.600739	0.0941437	-0.898436	-1.13414	0.451775	-0.485594	-0.09808	0.343268	-0.531832	-1.69831	-1.12716	0.701822	0.112658	-0.322052	-0.410211	-0.730565	-0.109465	0.299688	0.414137
ACGTACATCCCTCGAT-1_1	Cancer_HGSOC1	2651	1162	17.7669	NA	NA	4	4	0.225464	Singlet	Tumor	NK_cell	T	-0.143212	-1.1078	-0.42555	-0.79744	-0.971452	-0.86193	-0.410225	-0.85847	0.0405076	-0.723086	-0.690412	-0.772084	-1.10628	-0.552035	-0.468707	-0.631434	-0.589701	-0.962042	-0.620197	-0.595173	-0.289368	-1.09198	-0.380203	-0.0460568	-0.429094	-0.712432	-1.34776	-1.1972	1.54367	0.235885	-0.343821	-0.956218	-0.975214	0.0402082	-0.314497	-1.1612
ACGTACATCGACGAGA-1_1	Cancer_HGSOC1	8865	2599	16.0632	NA	NA	1	1	0.314766	Singlet	Tumor	DC	myeloid	1.75678	-0.177123	0.849687	0.467167	-0.392161	0.381882	0.875895	0.606274	-1.80647	0.564571	0.320632	1.50349	0.0203197	-0.297412	-0.203131	0.0852638	0.402032	-0.295831	0.130204	-0.331914	0.31286	-0.310936	0.804376	0.84623	0.923135	1.9296	0.249226	0.980886	0.5089	1.2615	0.066985	0.687005	-0.0815242	0.222754	0.327449	1.76249
ACGTAGTAGGTGCCTC-1_1	Cancer_HGSOC1	41420	6917	14.5558	NA	NA	0	0	0.34748	Singlet	Tumor	Macrophage	epithelial	1.91186	1.95941	0.796694	1.79361	0.948783	1.77988	1.36741	2.25268	-0.679908	1.3156	1.11447	1.6576	1.33257	1.05679	-0.205985	2.92571	2.64676	1.13961	1.44461	1.15795	1.91236	1.99169	1.65258	2.08977	1.4606	1.66264	0.669317	1.08703	-1.31191	1.97027	1.84843	1.71613	1.48508	2.26264	2.18218	1.50914
ACGTAGTAGTACCCTA-1_1	Cancer_HGSOC1	4501	1376	7.99822	NA	NA	2	2	0.219275	Singlet	Tumor	T_cells	CD4T	-1.11132	-0.625896	-0.172164	-0.561006	-0.326136	-1.09051	-0.264373	-0.808031	-0.502305	-0.701877	-0.584785	-0.447846	-0.665276	-0.565008	-0.65887	-0.59198	-0.700025	-0.679691	-0.783067	-0.829347	-0.943124	-0.63643	-0.201365	-0.504779	-0.628364	-0.522522	-0.807562	-0.783898	0.40498	-0.53862	-0.661978	-0.669635	-0.483407	-0.68016	-1.09141	0.0318253
ACGTAGTCAACCGCTG-1_1	Cancer_HGSOC1	8152	2235	9.35967	NA	NA	12	12	0.228117	Singlet	Tumor	B_cell	B	-1.10177	-0.0540114	0.0556096	-0.47342	-1.19899	-0.794712	-1.03635	-0.842807	-0.488656	-0.833182	-1.25836	-0.382278	0.235624	0.196659	-0.676152	-0.11655	-0.114543	-0.14579	-0.116575	-0.349481	0.193307	-0.468159	-0.187703	-0.177021	-0.341648	0.39268	-0.858981	-0.595328	-0.122834	-0.858079	0.143528	-0.280926	0.242036	-0.417478	-0.472965	-0.553963
ACGTAGTCAATTCGTG-1_1	Cancer_HGSOC1	4147	1811	6.19725	NA	NA	3	3	0.167109	Singlet	Tumor	NK_cell	NK	-0.196874	-0.232613	0.391564	-0.461416	-0.531889	-0.0680558	0.0268753	-0.302295	-0.210565	-0.996441	-0.469089	-0.142574	-0.43817	-0.691974	-0.485996	-0.098827	-0.348976	-0.615732	-0.289173	-0.386904	-0.137612	-0.17387	-0.125302	0.565383	1.06524	-0.0025065	-0.826417	-0.676012	0.231066	-0.142609	-0.330013	-0.633641	-0.233437	-0.627169	-0.250703	-0.723054
ACGTAGTGTCATATGC-1_1	Cancer_HGSOC1	1687	836	22.9401	NA	NA	4	4	0.20336	Singlet	Tumor	NK_cell	T	-0.528169	-1.29912	-0.808729	-0.495397	-0.814163	-1.01828	-1.35667	-0.670717	0.600573	-0.852816	-0.941969	-1.40379	-0.919075	-0.704507	-0.546593	-0.327466	-0.593826	-1.21702	-0.752446	-0.860546	-0.381023	-1.25127	-0.765236	-0.844474	-0.471944	-0.556307	-1.19446	-1.17218	1.02289	-0.114244	-0.44414	-1.22956	-1.2277	-0.824273	-0.685309	0.0477999
ACGTAGTTCAAAGCCT-1_1	Cancer_HGSOC1	7617	2253	13.8375	NA	NA	1	1	0.306808	Singlet	Tumor	Macrophage	myeloid	-1.02599	-0.400288	1.07419	-0.426402	-0.29176	-0.162538	0.25124	0.184136	-1.69111	-0.760607	0.970625	0.540942	-0.26269	0.126022	-0.0899075	-0.192431	-0.414023	-0.613327	-0.0304226	-0.631191	-0.654399	-0.203897	0.133462	0.285093	1.44816	1.76479	1.13127	1.64505	-0.122195	1.47298	-0.325927	0.0786982	-0.141569	-0.988317	-0.0947661	0.560817
ACGTAGTTCTTACTGT-1_1	Cancer_HGSOC1	3897	1509	9.39184	NA	NA	2	2	0.249337	Singlet	Tumor	T_cells	CD4T	-1.20167	-0.563412	0.378368	-0.762611	-0.36673	-1.09283	0.651685	-0.142416	0.0737367	-0.635984	-0.998339	-0.057772	-0.308969	-0.492338	-0.460571	-0.55043	-0.473742	-0.49576	-0.186912	-0.684256	-0.866029	-0.61286	-0.371689	0.477391	0.0577127	0.274025	1.03247	0.794188	0.234365	0.406728	-0.424186	-0.777342	-0.280492	-0.377188	-0.805027	-0.247731
ACGTCCTCACGAAAGC-1_1	Cancer_HGSOC1	4173	1933	10.52	NA	NA	3	3	0.195402	Singlet	Tumor	NK_cell	NK	-0.333442	-0.819487	0.675591	-0.55645	-0.330907	-0.0234406	-0.519802	-0.189675	-1.20665	0.0496135	-0.367229	0.0898259	-0.640724	-0.299247	-0.700019	-0.713546	-0.583645	-0.509234	-0.140605	-0.834158	-0.356455	-0.744826	-0.0316541	0.0879987	-0.0142961	-0.591543	-0.209216	0.0351431	0.643528	-0.579524	0.811829	-0.410772	-0.311654	-0.806614	-0.0950749	-0.417295
ACGTCCTCACGGTGAA-1_1	Cancer_HGSOC1	3493	1466	13.9708	NA	NA	3	3	0.253758	Singlet	Tumor	NK_cell	NK	-1.14107	-0.655562	-0.177358	-0.544721	-0.256874	-0.743702	1.00672	-0.1758	-0.189736	-0.380272	-0.324388	-0.456113	-0.775532	-0.47738	-0.209924	-0.557683	-0.482379	-0.707759	-0.566125	-0.907709	-1.42173	-0.856437	-0.424995	-0.439429	-0.549035	-0.275536	-1.04879	-0.84255	0.225963	0.0101107	-0.394772	-0.648537	-0.65655	-0.765467	-0.378631	0.0543551
ACGTCCTCATGACTAC-1_1	Cancer_HGSOC1	85693	9403	13.4433	NA	NA	0	0	0.30504	Singlet	Tumor	Epithelial_cells	epithelial	1.60996	2.85979	-0.242747	2.32453	0.438932	2.94448	2.77559	1.87837	2.27289	3.13247	1.62249	1.50969	2.51191	2.37672	0.29973	3.67932	3.12887	2.33676	2.77255	1.87222	1.65496	2.73508	1.51446	1.37944	1.11816	0.216991	0.755853	1.10216	-0.325266	-0.711486	2.7916	2.23125	1.9311	3.26266	3.35567	2.14916
ACGTCCTGTCGATTAC-1_1	Cancer_HGSOC1	9067	2564	15.6612	NA	NA	1	1	0.240495	Singlet	Tumor	Macrophage	myeloid	-0.875599	-0.108996	1.04013	-0.254192	0.134357	0.272772	-0.231303	0.0637776	0.102756	-0.0184957	0.6066	0.591401	-0.0528525	-0.128238	-0.0644601	-0.225291	-0.114897	-0.584428	-0.276002	-0.435389	-0.671781	0.129228	-0.10292	-0.183636	1.17126	1.31034	0.0789695	0.269589	0.0644762	1.99963	-0.239552	-0.0536883	-0.241611	-0.0877655	-0.107992	0.110966
ACGTCCTTCACCTGTC-1_1	Cancer_HGSOC1	29548	5365	5.31339	NA	NA	1	1	0.313882	Singlet	Tumor	Macrophage	myeloid	0.520531	1.77273	1.74394	1.48954	2.60686	1.80761	2.25684	1.99015	0.0289862	1.62624	1.67963	3.19363	1.62804	0.0135193	0.479453	1.21939	1.43119	1.44721	0.572692	1.52364	2.93419	2.56133	2.42914	2.92914	3.3539	4.19428	2.7682	2.98	-0.421935	3.4962	1.71771	1.47758	0.838513	-0.851752	1.36106	1.99493
ACGTCCTTCTGAGAAA-1_1	Cancer_HGSOC1	878	457	1.93622	NA	NA	0	0	0.258179	Singlet	Tumor	NK_cell	epithelial	0.533761	-0.943706	-1.19907	-0.919962	-0.5462	-0.909075	-0.835522	-1.39259	-0.881843	-0.45424	-0.148739	-1.11514	-1.0975	-1.15303	-0.429827	-0.600698	-0.895599	-0.950424	-1.23047	-0.705592	-0.930948	-1.20579	-1.03867	-1.66548	-1.17911	-1.24485	-1.12645	-1.60194	1.08851	-0.649322	-1.37382	-1.21372	-1.32653	-0.783838	-0.75801	-0.600168
ACGTTCCAGCCTATTG-1_1	Cancer_HGSOC1	6586	1860	15.7759	NA	NA	1	1	0.301503	Singlet	Tumor	Macrophage	myeloid	0.94357	-0.487872	0.131566	-0.424498	0.387032	-0.438009	-1.04221	0.396155	-1.01625	-0.390696	1.15265	0.45204	-0.802577	-0.620036	-0.175341	-0.273216	-0.278571	-1.08613	-0.518447	-0.835914	2.02205	-0.0249869	0.0977326	0.712975	1.55865	1.91204	-0.393024	-0.248112	0.166126	0.582549	0.200493	-0.344104	-0.719781	-0.441859	0.256283	1.45738
ACGTTCCAGCCTGAGA-1_1	Cancer_HGSOC1	1549	740	16.0103	NA	NA	4	4	0.202476	Singlet	Tumor	T_cells	T	-0.256016	-1.4753	-0.845535	-1.09953	-0.199545	-0.858778	-1.01908	-0.979652	-0.561286	-1.34241	-0.58289	-1.16221	-1.038	-0.927106	-0.426487	-0.885511	-0.779151	-1.07734	-0.502656	-0.988231	0.223617	-1.24444	-0.957244	-1.22833	-0.865873	-0.814484	-1.17281	-0.903478	1.05514	-0.626601	-0.773655	-1.42839	-1.60393	-1.09033	-0.510788	-1.0789
ACGTTCCAGTGACCTT-1_1	Cancer_HGSOC1	5104	2154	3.72257	NA	NA	2	2	0.234306	Singlet	Tumor	T_cells	CD4T	-0.151342	-0.0884428	0.629862	0.0656856	-0.9673	-0.340819	-0.34761	-0.0844617	0.901013	-0.236398	-0.724803	-0.112432	0.288468	-0.0104522	-0.536729	0.146893	0.00426184	-0.22341	0.108867	-0.26965	-0.102868	0.400243	-0.33715	-0.271601	0.567031	0.348231	0.25547	0.3359	0.572036	-0.198391	-0.0982198	-0.0612004	-0.365634	-0.273614	-0.629624	-1.38309
ACGTTCCCAACACGTT-1_1	Cancer_HGSOC1	8274	2898	17.0776	NA	NA	0	0	0.289125	Singlet	Tumor	Epithelial_cells	epithelial	-0.35905	0.0921258	-0.980653	0.035517	0.652573	1.26599	0.24113	0.0889431	-0.451483	0.49397	0.931833	-0.322868	-0.425068	-0.191416	0.21659	0.251482	0.40556	-0.334973	-0.0346238	-0.378941	0.510464	0.283327	-0.327296	-0.397827	-0.541301	-0.513148	-0.671889	-0.480772	-0.174467	-1.02959	1.00708	-0.551243	0.110136	-0.442227	0.383566	-1.98426
ACGTTCCCACCGTACG-1_1	Cancer_HGSOC1	12742	3419	7.2987	NA	NA	1	1	0.27321	Singlet	Tumor	Monocyte	myeloid	0.805354	0.664083	1.22571	0.351502	-0.474881	0.385109	-1.56866	1.08828	-0.449806	0.215385	0.71662	1.39399	0.915667	0.302775	0.0870996	-0.355955	-0.38916	-0.12972	0.10353	-0.276643	2.08966	1.0549	0.256921	0.471759	1.92341	1.64359	0.459811	0.620599	-0.377714	1.29804	0.0241169	0.746637	0.647736	0.514299	0.64736	0.268022
ACGTTCCCACTGTGAT-1_1	Cancer_HGSOC1	11030	3329	6.29193	NA	NA	1	1	0.259947	Singlet	Tumor	Macrophage	myeloid	-1.46619	0.904517	0.727526	0.670008	0.133511	-0.0107409	0.325106	0.810539	-0.189127	0.804549	1.69231	1.38484	1.00917	-0.0725575	0.154694	-0.0847747	0.467094	0.250574	-0.0334094	0.0754043	0.864877	1.05056	0.294392	0.0808511	1.82301	1.53843	-0.0246008	0.457797	0.13243	1.48229	0.177271	0.354644	0.189341	-0.61966	0.87312	-0.241842
ACGTTCCCAGCTCATA-1_1	Cancer_HGSOC1	11661	3082	18.8234	NA	NA	0	0	0.243148	Singlet	Tumor	Epithelial_cells	epithelial	0.909557	-0.402387	-1.49102	0.243521	1.15477	0.162022	0.428679	-0.302835	0.239812	-0.18452	0.142965	-0.819858	-0.0216644	0.530336	-0.214287	0.958932	0.22708	-0.41932	0.917567	-0.380693	0.634431	0.105055	0.205119	-0.0802991	-0.704179	-0.4795	-1.0416	-0.836027	1.21215	-1.23679	0.931122	-0.439017	0.0426072	0.361769	0.663918	0.909788
ACGTTCCCATCGAAGG-1_1	Cancer_HGSOC1	3197	1595	15.5145	NA	NA	3	3	0.190981	Singlet	Tumor	NK_cell	NK	-0.307727	-0.983364	1.01254	-0.0536771	-0.731405	0.0310716	0.907782	-0.915735	-1.02931	-0.255028	-1.00081	-0.613747	-1.16934	-0.706519	-0.447435	-0.0883503	-0.649178	-0.54689	-0.486142	-0.657629	-0.377619	-0.214105	-1.22449	0.526411	-0.43907	-0.0812792	-1.0733	-0.902168	0.101255	0.374263	0.168599	-0.620684	-0.705289	-0.603509	-0.48598	-1.2269
ACGTTCCGTGAGACCA-1_1	Cancer_HGSOC1	31210	5912	18.9138	NA	NA	0	0	0.311229	Singlet	Tumor	Epithelial_cells	epithelial	3.76384	1.7629	-0.242517	0.845293	-0.0935029	2.60129	1.19129	1.54488	0.626761	1.25165	1.02069	0.658886	1.0918	0.928596	0.235543	2.66511	2.16689	0.753293	1.47381	0.946208	2.85002	1.46477	1.06797	1.02944	0.811824	-0.0687472	1.08406	0.912763	1.02972	-0.324695	1.55282	1.17103	1.102	1.44071	1.77412	1.22697
ACGTTCCGTGGCTGAA-1_1	Cancer_HGSOC1	63834	3789	2.79318	NA	NA	8	8	0.218391	Singlet	Tumor	B_cell	B	0.353546	0.389977	0.399097	0.64015	-0.597266	-0.0808282	-0.993667	0.823165	-0.250968	0.716866	-0.642407	0.495039	0.808242	0.445821	-0.570565	0.174689	0.00222853	0.0276528	0.573713	0.99226	-1.80392	-0.0493861	0.76753	-0.751423	-0.172831	0.244381	0.589431	0.811929	-1.39421	-0.287004	0.320912	0.883248	0.702468	0.575206	-0.281183	-0.47673
ACGTTCCGTGTCATGT-1_1	Cancer_HGSOC1	1693	768	21.0278	NA	NA	4	4	0.202476	Singlet	Tumor	T_cells	T	0.302521	-1.18258	-0.986612	-1.42973	-0.810964	-1.28881	-1.34547	-0.868957	-0.489822	-0.799415	-0.366642	-0.965869	-1.13152	-0.154586	-0.507287	-0.082454	-0.525442	-1.10114	-0.316342	-1.25505	-1.10601	-0.986466	-0.479898	-0.472394	-0.184024	-0.526806	-1.36612	-1.20833	0.857287	-0.785165	-0.840275	-1.00572	-1.08397	-0.496384	-0.728498	-0.376995
ACGTTCCGTTACACAC-1_1	Cancer_HGSOC1	4307	1705	19.4567	NA	NA	0	0	0.304156	Singlet	Tumor	Epithelial_cells	epithelial	0.746192	-0.160436	-1.04377	0.635302	0.623089	0.636856	-0.983995	0.0256633	-0.866936	1.34649	0.553021	-0.368811	-0.797916	-0.767659	0.103642	0.638837	0.6745	-0.178335	-0.521917	0.0248361	0.34436	0.117342	-0.317415	-0.549068	-0.752392	-0.827392	-1.19003	-1.25937	0.146067	-0.320928	-0.281435	-0.0602362	-0.0799171	0.261196	0.438487	0.339394
ACGTTCCTCAAGTCTG-1_1	Cancer_HGSOC1	5027	2138	5.76885	NA	NA	3	3	0.237843	Singlet	Tumor	NK_cell	NK	0.318675	-0.474759	0.600893	-0.737003	-0.374241	-0.626916	0.564624	0.403232	-0.648814	-1.15417	-0.639343	0.0190906	-0.381699	-0.0562058	-0.326551	-0.675382	-0.306771	-0.289905	-0.218526	-0.683879	0.303166	-0.281268	-0.0997665	-0.0556137	0.153279	0.557821	0.724769	0.72671	0.702706	0.741414	-0.0457732	-0.411796	-0.151242	-1.00737	-0.599817	-0.98349
ACGTTCCTCTTCGCTG-1_1	Cancer_HGSOC1	9143	2986	15.5638	NA	NA	3	3	0.278515	Singlet	Tumor	NK_cell	NK	1.09803	-0.39247	1.42851	0.197157	-0.331918	-0.0472809	0.239467	0.684173	0.397322	-0.515444	-0.48962	0.787545	-0.0508935	-0.0746586	-0.665161	-0.365963	-0.13649	0.000158386	0.524447	-0.194817	0.724711	0.383569	0.915819	0.952828	0.786497	0.496019	0.251086	0.760668	-0.231901	1.13751	0.974108	-0.0874002	0.323488	-0.202535	-0.49077	-0.196939
ACTACGAAGCCTGTCG-1_1	Cancer_HGSOC1	1672	945	17.1651	NA	NA	4	4	0.217507	Singlet	Tumor	NK_cell	T	0.344574	-1.28648	-0.254675	-0.64545	0.270731	-0.45825	0.592105	-0.699144	-0.719784	-0.624143	-0.944933	-0.655593	-1.04805	-0.750499	-0.706564	-0.665647	-0.609023	-0.688538	-0.405987	-1.05832	-0.0405581	-0.572722	-0.814732	0.202153	0.0502259	-0.0938396	0.180189	0.333679	0.885909	-0.376249	-0.652981	-1.29007	-1.26055	-1.00225	-0.504347	-0.156605
ACTACGAAGCGAACTG-1_1	Cancer_HGSOC1	6146	2133	6.55711	NA	NA	5	5	0.231653	Singlet	Tumor	T_cells	CD8T	-0.61699	-0.576269	0.958128	-0.107451	-0.687812	-0.23394	-0.132601	-0.25555	0.14156	-0.357218	-0.823526	-0.292992	-0.263333	0.0609089	-0.338523	-0.578208	-0.483249	-0.147471	0.25953	-0.772736	0.443326	0.260048	-0.580443	-0.23617	-0.0513091	-0.510587	-0.291168	0.172855	0.0711025	-0.385403	0.0694707	-0.13515	0.271669	-0.13133	-0.327629	-1.60276
ACTACGACAGGTACGA-1_1	Cancer_HGSOC1	5768	1819	11.7545	NA	NA	8	8	0.201592	Singlet	Tumor	B_cell	B	-0.677616	-0.598321	-0.908883	0.286334	-0.959297	-0.696462	-1.56396	-0.581999	-0.966544	-0.750085	-1.31196	-0.325316	-0.656704	-0.491852	-0.617793	-0.299187	-0.262345	-0.554863	-0.34391	-0.891706	-0.55079	-0.156539	-0.739416	-0.452728	0.0866718	-0.412633	-0.569344	-0.692038	-0.108623	-0.933886	-0.174934	-0.036011	-0.572246	-0.747064	-0.73365	-0.828155
ACTATCTAGGAACATT-1_1	Cancer_HGSOC1	7702	2448	11.4256	NA	NA	1	1	0.248453	Singlet	Tumor	Macrophage	myeloid	-0.731293	0.18829	0.487514	0.628369	0.186063	-0.531919	-1.13104	0.602205	1.61395	-0.382608	0.962164	0.822789	-0.541871	-0.220154	-0.384213	-0.0638912	-0.0909607	-0.689101	-0.427785	-0.0526763	-0.901588	0.460779	0.784146	0.69337	0.645672	1.76192	-0.263191	0.0628506	-0.123278	1.8127	-0.0528295	0.112412	-0.203889	-0.255398	0.37494	-0.206
ACTATCTCAAGGCTTT-1_1	Cancer_HGSOC1	12082	1889	7.36633	NA	NA	15	15	0.217507	Singlet	Tumor	B_cell	B	-0.636591	-0.700821	-0.138127	0.133221	-0.222452	-0.79856	-1.09917	-0.0173679	-1.46764	-0.719752	-0.855208	-0.952374	-0.513343	-0.456222	-0.365426	-0.674474	-0.48092	-0.434487	-0.426953	-0.434003	-0.9734	-0.230696	-0.447616	-1.16417	-0.132425	-0.0999182	-0.702457	-0.547941	1.24833	-0.507003	-0.351388	-0.62225	-0.466122	-0.362544	-0.297216	-0.947176
ACTATCTGTCGCACAC-1_1	Cancer_HGSOC1	973	577	2.36382	NA	NA	0	0	0.269673	Singlet	Tumor	NK_cell	epithelial	1.33578	-0.628141	-1.38363	-0.668042	-0.367856	-0.940025	-0.0424042	-0.909787	0.448296	-0.497786	0.476297	-0.980066	-1.13311	-1.03164	-0.344537	-0.431177	-0.387124	-0.828185	-1.28349	-0.75472	-0.322753	-0.671934	-0.837948	-1.2965	-1.18623	-1.06418	-1.4354	-1.59903	1.66022	-0.717087	-1.0997	-1.02568	-1.17552	-0.603125	-0.716888	-0.665837
ACTATCTTCACGATAC-1_1	Cancer_HGSOC1	10266	3556	10.4033	NA	NA	0	0	0.242263	Singlet	Tumor	Epithelial_cells	epithelial	-0.0882876	0.538777	-1.0401	0.638887	1.20498	0.828692	0.15929	0.20096	0.508783	-0.159766	-0.0116304	-0.0804844	0.0886695	0.260469	-0.156115	1.44429	0.218285	-0.557036	0.229756	0.310537	1.01526	0.589118	0.46508	-0.507236	-0.237807	-0.521557	-0.830829	-0.850189	0.146714	-1.45388	0.804926	0.303748	0.301889	1.08741	0.789962	0.848187
ACTATCTTCCTATTTG-1_1	Cancer_HGSOC1	8527	3016	7.9864	NA	NA	2	2	0.232538	Singlet	Tumor	T_cells	CD4T	-1.0138	0.452123	1.40455	-0.062539	-0.628266	-0.225717	-0.833855	0.384661	0.315601	-0.5955	-0.596557	0.497781	0.760507	0.345218	-0.509017	0.546101	0.584602	0.7318	0.420506	-0.156539	-1.14941	-0.0185152	0.494288	2.15269	0.0273064	1.19755	-0.0195442	0.609311	-0.620434	1.29274	0.577692	0.68018	0.682693	0.836191	-0.149993	-0.975389
ACTATCTTCGCTACGG-1_1	Cancer_HGSOC1	6032	1954	8.48806	NA	NA	2	2	0.233422	Singlet	Tumor	T_cells	CD4T	-1.42123	-0.28217	0.429522	-0.153408	-0.486365	-0.0653266	-0.258055	-0.00959317	-0.0565575	0.0514394	-1.06784	-0.121898	-0.369934	-0.331406	-0.223744	-0.544944	-0.481168	-0.00399781	0.0768201	-0.880754	-0.736943	-0.666621	-0.150911	-1.00948	0.257742	-0.326957	-0.35399	-0.506426	0.350285	-0.17317	-0.161043	-0.356855	-0.180542	-0.39982	-0.33199	-0.353108
ACTATCTTCGGACAAG-1_1	Cancer_HGSOC1	8942	2612	9.00246	NA	NA	2	2	0.251989	Singlet	Tumor	T_cells	CD4T	-1.41667	-0.0310723	0.9	-0.163922	0.762753	0.028511	-0.718611	0.571617	0.437802	-0.571418	-0.19998	0.0310071	0.191654	-0.428878	-0.553698	-0.0588158	-0.294508	0.397385	0.153859	-0.324509	-0.381576	0.0739938	0.200313	0.812983	-0.0285313	0.436612	0.0301113	0.560543	-0.654663	0.889643	0.287294	0.0111735	-0.0176006	-0.248065	-0.788345	0.980491
ACTATCTTCTTGCAAG-1_1	Cancer_HGSOC1	3792	1792	5.8808	NA	NA	3	3	0.208665	Singlet	Tumor	NK_cell	NK	0.113781	-0.820649	0.48713	-0.201156	-0.351901	-0.14027	-0.837275	-0.866057	-0.704924	-0.856746	-1.14543	-0.401704	-0.468116	-0.301036	-0.544439	-0.580415	-0.795929	-0.624691	-0.200732	-0.879399	-0.409857	-0.916664	-0.580999	0.0978433	-0.710767	-0.392858	-1.12183	-0.698484	-0.0866811	0.15535	0.0643604	-0.485649	-0.549592	-0.650186	-0.306639	-1.08264
ACTATGGAGGTTAAAC-1_1	Cancer_HGSOC1	16396	3791	14.5645	NA	NA	7	7	0.248453	Singlet	Tumor	Macrophage	CD8T	0.597043	0.154608	1.03743	-0.809077	0.336259	0.755739	-0.78587	1.64234	-0.570705	0.461882	0.747317	1.70586	0.127863	1.73351	-0.0941144	-0.0589818	0.615684	-0.0417087	2.99462	-0.610863	1.60226	0.763014	0.37444	1.3305	1.10624	1.77868	1.10132	1.05049	0.119705	2.40872	2.11023	0.44329	0.555236	0.68472	0.0983295	-0.712237
ACTATGGCAAGCGATG-1_1	Cancer_HGSOC1	2417	1219	10.0538	NA	NA	5	5	0.215738	Singlet	Tumor	NK_cell	CD8T	-0.928038	-1.1322	0.16849	-0.229183	-0.142626	-0.261045	0.409474	-0.83556	-1.74122	-0.655241	-0.335868	0.255463	-1.24123	-0.804351	-0.0613845	-0.612235	-0.996447	-0.814776	-0.545612	-1.07511	0.945688	-0.528623	-1.6917	-1.14397	-0.963484	0.117331	-1.26559	-0.900635	0.271032	-0.42218	-0.522074	-0.892319	-0.613388	-0.72944	-0.467312	-1.46062
ACTATGGCAATTTCGG-1_1	Cancer_HGSOC1	8624	3138	18.9239	NA	NA	11	11	0.209549	Singlet	Tumor	Endothelial_cells	endothelial	0.365043	-0.209369	-0.868661	0.352505	1.318	0.768294	-0.196373	0.184526	-0.466943	0.689199	1.23249	-0.316679	-0.25178	-0.304742	0.836787	0.0928408	-0.689781	-0.517877	0.362042	-1.1461	2.37773	0.480122	0.270729	0.822433	-0.613544	-0.775234	-0.779123	-0.813037	-0.810191	0.375125	1.26522	-0.551788	-0.302877	-0.183558	1.26379	-0.245254
ACTATGGCAGAAGCTG-1_1	Cancer_HGSOC1	1062	569	10.8286	NA	NA	4	4	0.183024	Singlet	Tumor	T_cells	T	-0.259914	-1.30651	-1.40288	-1.1762	-0.347339	-1.02156	-0.548644	-1.13825	0.326297	-0.970711	-0.563254	-1.1276	-1.29804	-1.00069	-0.38425	-0.844296	-1.08124	-1.00625	-0.880764	-1.15592	-0.235578	-0.91195	-1.17068	-0.880851	-1.13964	-0.837636	-1.57822	-1.65224	0.910745	-0.619542	-0.795309	-1.28312	-1.45191	-0.485097	-0.0625515	-1.11523
ACTATGGGTCCAGAAG-1_1	Cancer_HGSOC1	13508	3442	10.9491	NA	NA	1	1	0.236074	Singlet	Tumor	Macrophage	myeloid	0.123259	0.633908	1.70884	0.556683	0.486462	0.0991909	-0.262298	0.76411	0.637474	0.626489	2.0562	1.84054	0.184497	0.0264539	0.244344	0.38818	0.339924	0.187023	0.54784	-0.113029	0.54986	0.859712	0.638037	0.53712	2.44707	2.88612	0.0411526	0.523616	0.129136	1.97718	0.712497	0.116761	0.465731	-0.13261	0.409192	0.466116
ACTATTCAGAGAAGGT-1_1	Cancer_HGSOC1	35250	6112	24.6667	NA	NA	0	0	0.296198	Singlet	Tumor	Epithelial_cells	epithelial	-1.88922	1.17791	-0.090199	1.43205	0.592203	1.87945	2.46581	1.90397	0.390744	1.26486	-0.160957	0.406702	1.39284	0.816505	-0.200623	1.82692	1.56668	1.1336	0.595473	0.725659	2.80192	1.70275	0.688524	0.822941	1.6309	-0.215512	1.75879	1.95322	-1.48457	0.183614	1.4752	0.738307	1.10491	0.922516	1.89715	-0.526159
ACTATTCCACGATTCA-1_1	Cancer_HGSOC1	11677	3559	13.9591	NA	NA	0	0	0.291777	Singlet	Tumor	Epithelial_cells	epithelial	-0.705937	0.177087	-1.26346	0.756402	1.1761	0.523624	-0.492943	0.101669	-0.384304	-0.247221	0.128098	-1.34758	0.127377	0.218336	-0.00314728	1.12677	0.777588	0.195955	0.534406	0.482701	1.03675	0.43529	0.186118	-0.111801	-0.752649	-0.918493	-0.975352	-0.944035	-0.480715	-0.579174	0.615927	0.0432442	0.297491	0.54244	1.53823	-1.27314
ACTATTCGTTGCCGCA-1_1	Cancer_HGSOC1	10896	3111	16.9236	NA	NA	0	0	0.297082	Singlet	Tumor	Epithelial_cells	epithelial	-0.749127	0.838962	-0.800828	0.892176	0.028062	0.545554	1.17469	0.823937	0.0163084	0.404401	0.552296	-0.442799	0.00693109	0.397002	0.0321795	0.531435	0.490036	0.108578	0.259823	-0.785213	1.11006	0.312797	-0.145326	-0.653889	-0.538043	-0.93112	-0.346649	-0.585575	1.60128	-0.884324	0.519535	-0.550807	0.0387636	0.715026	1.486	-1.3739
ACTATTCTCATGCATG-1_1	Cancer_HGSOC1	9693	2859	22.2222	NA	NA	1	1	0.330681	Singlet	Tumor	Monocyte	myeloid	-0.246998	0.191565	0.627579	0.273606	-0.328703	0.167666	-0.331976	0.80981	-0.218643	0.0266823	0.413659	0.295543	-0.388081	0.898784	-0.200512	0.0236443	0.253909	-0.0776541	1.31819	-0.656864	1.45922	-0.0568887	0.256882	1.14505	0.888918	1.20214	-1.07141	-0.38861	-0.10154	1.85626	1.12448	0.433772	0.685206	1.06838	0.177804	0.736543
ACTATTCTCGGTATGT-1_1	Cancer_HGSOC1	5569	1964	8.67301	NA	NA	3	3	0.184792	Singlet	Tumor	NK_cell	NK	-1.0422	-0.63228	0.93639	-0.74703	-0.5746	-0.423541	0.613292	0.0884426	-1.09705	-0.29285	-1.18377	-0.0119647	-0.265726	-0.544383	-0.343302	-0.471764	-0.531086	-0.482112	-0.591622	-0.776455	0.174506	-0.585985	-0.126372	0.853976	0.871885	-0.210858	0.660471	0.470136	0.431234	0.178378	-0.585285	-0.402937	-0.408702	-0.458325	-0.0012184	-0.652316
ACTCCCAAGATTAGAC-1_1	Cancer_HGSOC1	3643	1401	17.5954	NA	NA	1	1	0.311229	Singlet	Tumor	Monocyte	myeloid	-0.912533	-0.714113	0.0260398	-0.582932	0.0813666	-0.966914	-0.704038	-0.703383	-0.262844	-0.979048	-0.281267	-0.170781	-0.693802	-0.739918	-0.266873	-0.145517	-0.324228	-0.906195	-0.327493	-0.857713	0.473434	-0.664552	-0.0134166	-0.234449	0.543282	1.07267	-0.323042	-0.081365	0.66351	0.755679	-0.166277	-0.633146	-1.13501	-0.534641	-0.399248	-0.184102
ACTCCCACACAAACGG-1_1	Cancer_HGSOC1	27155	2887	2.38262	NA	NA	8	8	0.221927	Singlet	Tumor	B_cell	B	-0.215557	0.654704	0.198903	0.634383	-0.495913	-0.843196	-0.187583	0.31705	0.482624	-0.148275	-0.396684	-0.0160198	0.428262	0.157856	-0.507483	0.0948482	0.360347	0.14561	-0.238879	0.211339	-0.152988	0.754266	0.366794	0.29958	0.0518833	-0.422103	-0.582781	-0.00112428	-0.0328413	-0.0114939	0.269355	0.511185	0.588434	0.199058	-0.598731	0.111891
ACTCCCACACCAGTTA-1_1	Cancer_HGSOC1	20086	5219	6.0938	NA	NA	0	0	0.297966	Singlet	Tumor	Epithelial_cells	epithelial	0.738517	1.46694	-0.683566	1.01274	0.915004	1.77278	0.45904	1.57547	0.183023	1.53108	0.322892	-0.287052	0.7916	0.741935	-0.19651	2.62008	2.18786	0.674224	0.70796	0.996187	1.43265	1.70338	0.968021	0.694789	0.221001	-0.181198	0.420829	0.396153	0.352339	-0.348012	1.03583	1.00232	1.18176	1.62848	1.43919	-0.225713
ACTCCCACATTGTGCA-1_1	Cancer_HGSOC1	5668	2094	9.9506	NA	NA	3	3	0.190981	Singlet	Tumor	NK_cell	NK	-0.988071	-0.380428	0.690472	-0.727798	-0.0241713	0.100799	-0.273375	-0.372276	0.0644001	0.193363	-0.727724	0.122092	-0.909637	-0.44842	-0.232096	-0.38256	-0.552587	-0.112385	-0.147194	-0.430587	-0.786545	-0.677935	-0.232156	-0.067471	0.335825	0.0455533	-0.488992	-0.328038	-0.0108936	0.315397	0.223198	-0.210981	-0.195759	-0.163253	-0.414582	-0.703297
ACTCCCAGTAGTAAGT-1_1	Cancer_HGSOC1	806	576	4.96278	NA	NA	0	0	0.229001	Singlet	Tumor	Pre-B_cell_CD34-	epithelial	0.609556	-0.925715	-1.04133	-1.30854	-0.692043	-1.12779	-0.27092	-1.60176	-0.150391	-0.952696	-0.073295	-1.05645	-1.29162	-0.934246	-0.449603	-0.22316	-0.425533	-0.874891	-1.18725	-0.81235	-0.97635	-0.947218	-1.27307	-1.66628	-1.03196	-0.798848	-1.19465	-1.11664	1.45193	-0.407395	-1.34916	-1.11162	-1.37447	-0.683142	-0.657331	0.161728
ACTCCCAGTCCGGTGT-1_1	Cancer_HGSOC1	9150	2567	14.612	NA	NA	1	1	0.262599	Singlet	Tumor	Monocyte	myeloid	-0.901885	-0.425113	0.294094	0.824087	-1.02711	0.0473655	-0.803333	0.275602	-0.83785	0.244554	1.28391	0.735273	-0.329144	-0.135841	0.108901	0.108944	-0.118214	-0.158849	0.0669786	-0.626441	0.171196	0.268051	0.207586	0.990168	1.66465	1.92248	0.0820311	0.222309	-0.324838	2.04249	0.533917	-0.0146342	-0.395077	0.322188	0.47789	1.10511
ACTCCCAGTGTTCGAT-1_1	Cancer_HGSOC1	1250	699	17.2	NA	NA	4	4	0.209549	Singlet	Tumor	NK_cell	T	-0.423608	-1.40019	-0.79513	-1.4264	-0.298092	-0.906544	-0.931497	-1.30463	-0.0845728	-1.02353	-0.633691	-1.16201	-1.13116	-0.599591	-0.584252	-0.497505	-0.636044	-1.25108	-0.758186	-0.760621	-1.06028	-0.963458	-1.28746	-0.81774	-0.583726	-0.596703	-0.37887	-0.273307	0.778137	-0.450789	-0.75493	-1.29285	-1.35469	-0.883452	-0.655288	-0.76695
ACTCCCAGTTACCCAA-1_1	Cancer_HGSOC1	12742	3893	15.0604	NA	NA	0	0	0.285588	Singlet	Tumor	Epithelial_cells	epithelial	-0.475144	0.946171	-1.45113	0.995168	1.1743	0.707124	0.951078	0.310442	-0.0333578	0.395646	-0.0671825	-1.08377	0.284304	0.860814	-0.575333	1.02031	0.766485	0.143907	0.404512	-0.131153	0.939254	1.275	0.524088	0.163644	-0.370652	-0.948663	-0.217807	-0.529522	-0.0992009	-2.23651	0.526285	0.57644	0.900529	1.01248	1.31639	0.611414
ACTCCCATCCGTTGGG-1_1	Cancer_HGSOC1	7579	1625	0.60694	NA	NA	0	0	0.268789	Singlet	Tumor	Epithelial_cells	epithelial	-0.338129	0.199304	-1.35376	-0.774628	-0.348199	-0.63815	-0.86745	-0.596159	0.196801	-0.381287	-0.215555	-0.824274	0.115792	-0.691491	-0.650202	-0.495103	-0.526709	-0.0210947	-1.04011	-0.0192539	-1.11191	-0.198995	-0.794281	-1.30681	-1.55514	-1.55679	-1.19299	-1.43355	0.55444	-1.78861	-1.25679	-0.64312	0.183904	-0.333475	-0.607237	-0.279631
ACTCCCATCTTCGGTC-1_1	Cancer_HGSOC1	8034	2696	12.945	NA	NA	1	1	0.346596	Singlet	Tumor	NK_cell	myeloid	0.558495	-0.340362	0.897907	0.218691	-0.696359	0.369552	0.11123	0.223358	0.385359	-0.168428	0.206786	1.41072	-0.776929	-0.202196	-0.311486	-0.362626	-0.550399	-0.693897	-0.00722512	-0.651687	0.856597	0.35989	0.544011	0.736326	1.20386	0.963332	-0.0426511	0.37973	0.0617412	1.71049	0.372452	-0.0940509	-0.61975	-0.410337	-0.197358	1.58263
ACTCCCATCTTGCAAG-1_1	Cancer_HGSOC1	508	353	15.1575	NA	NA	0	0	0.223696	Singlet	Tumor	Pre-B_cell_CD34-	epithelial	0.633851	-1.08587	-1.36309	-1.06791	-0.243835	-1.14027	-0.0957726	-1.45934	-0.757851	-1.0993	-0.0354143	-1.23324	-1.16171	-1.06805	-0.29932	-0.520297	-0.896288	-1.2135	-1.08117	-1.04162	-0.876473	-0.927039	-1.15583	-1.17793	-0.827672	-0.842096	-1.74969	-1.78364	1.3157	-0.970381	-1.21569	-1.44297	-1.63138	-0.81123	-0.366533	-1.01418
ACTCTCGAGCGACTGA-1_1	Cancer_HGSOC1	7425	2321	21.9259	NA	NA	2	2	0.274094	Singlet	Tumor	T_cells	CD4T	0.140979	-0.539593	1.36333	-0.427094	0.911783	-0.738313	0.581738	0.829876	-0.487927	-0.0635839	0.279015	1.07834	-0.0760606	-0.25365	-0.339417	-0.247046	-0.18117	-0.346117	-0.0601596	-0.515737	-1.10916	1.02405	0.684677	1.33041	1.01465	1.47045	-0.731156	-0.0195309	-0.502721	1.853	0.331227	0.0376065	-0.118863	-0.146177	-0.305268	-0.367212
ACTCTCGAGGAAGTGA-1_1	Cancer_HGSOC1	5221	1803	16.9125	NA	NA	1	1	0.330681	Singlet	Tumor	Macrophage	myeloid	-0.809162	-0.0716093	0.252087	-0.811654	-1.0293	-0.902314	-0.579426	0.0583799	-1.07767	-0.23741	0.0195636	0.28883	-0.323748	-0.447466	-0.0976515	-0.603762	-0.66853	-0.442829	-0.29104	-0.550505	0.388173	-0.39732	0.182334	0.137644	0.648151	0.563554	-0.348497	-0.345474	0.9492	0.0723561	-0.238378	-0.470679	-0.706374	-0.184468	-0.0370757	0.250724
ACTCTCGGTAATGATG-1_1	Cancer_HGSOC1	5955	1771	7.18724	NA	NA	2	2	0.237843	Singlet	Tumor	T_cells	CD4T	0.949321	-0.39771	0.0360281	-0.57896	-0.168343	-0.039186	-0.911114	-0.10279	-0.107837	-0.690359	-0.458479	-0.22361	-0.621989	-0.245902	-0.142161	-0.307096	-0.860684	-0.382782	-0.666937	-0.715466	-0.862894	-0.592781	0.073629	0.336326	-0.691025	-0.456552	-1.054	-0.846811	0.291861	0.499691	-0.663698	-0.483233	0.0593201	-0.480403	0.0900151	-0.864701
ACTCTCGTCCGATGTA-1_1	Cancer_HGSOC1	33331	2522	1.18508	NA	NA	10	10	0.219275	Singlet	Tumor	B_cell	B	-1.19687	0.0111679	-0.214816	0.660725	0.159539	-0.646856	-1.08162	0.302609	0.0504931	-0.150372	-0.382258	-0.276323	0.711348	-0.289072	-0.261642	-0.506608	-0.352791	0.541166	-0.243756	-0.00390701	-0.0833765	0.270439	0.264936	0.0958546	0.237619	-0.397417	0.0141515	0.171957	-0.459261	0.314459	-0.24496	0.482322	0.402201	0.349792	-0.101835	0.591133
ACTCTCGTCTGCATAG-1_1	Cancer_HGSOC1	5675	1794	15.2247	NA	NA	1	1	0.303271	Singlet	Tumor	Macrophage	myeloid	-0.222007	-0.597129	-0.0636908	-0.161371	0.336605	-1.07751	-0.0530327	-0.0324999	-0.248755	-0.329617	0.727905	0.118741	-0.929146	-0.910624	-0.391853	-0.478761	-0.58238	-0.728545	-0.0879626	-0.96463	0.36114	-0.432808	-0.207362	-0.747837	0.837536	0.861294	-0.289309	0.0309227	0.834883	0.525596	-0.173622	-0.589914	-0.759142	-0.45297	-0.477968	0.523201
ACTGATGCAAATAGCA-1_1	Cancer_HGSOC1	4275	1749	4.21053	NA	NA	2	2	0.225464	Singlet	Tumor	T_cells	CD4T	0.844552	-0.262359	-0.162264	-0.86569	-0.344345	0.156727	-0.227102	0.147246	-0.266034	-0.987849	-0.497905	-0.175458	0.110232	-0.184658	-0.591027	-0.245589	-0.323415	-0.461495	-0.143929	-0.457625	-0.396019	-0.405605	0.110069	0.852851	0.141584	-0.807606	-0.243662	-0.242591	0.407833	0.800048	-0.249716	-0.393077	-0.447821	-0.575498	-0.238514	-0.692977
ACTGATGGTTCCACAA-1_1	Cancer_HGSOC1	4492	1872	8.19234	NA	NA	2	2	0.212202	Singlet	Tumor	T_cells	CD4T	-1.35426	-0.471742	0.0693007	-0.603598	0.252262	-0.404109	-0.799713	0.436315	-1.02262	-0.370368	-0.730563	-0.400335	0.150617	-0.033501	-0.152958	-0.545448	-0.388586	-0.281336	-0.0659554	-0.484851	-0.703029	-0.762307	-0.496007	-0.548918	0.0686851	0.388404	-0.618971	-0.591907	0.234395	0.455325	0.25489	-0.19925	0.107018	-0.818698	-0.681582	-0.851199
ACTGATGGTTCTATCT-1_1	Cancer_HGSOC1	9400	2708	6.70213	NA	NA	2	2	0.205128	Singlet	Tumor	T_cells	CD4T	-1.12631	-0.557225	0.386923	0.352563	-0.0566215	0.0477957	0.634783	0.742882	-0.259674	-0.607503	-0.797091	-0.646659	0.0881624	0.357237	-0.397355	-0.306319	-0.0902377	-0.647083	0.545476	-0.95509	-0.0995801	0.875527	0.0978878	0.253257	0.00161535	0.598285	-0.100484	0.143952	0.274991	0.97936	0.75619	-0.0820375	0.0361202	-0.702579	-0.836427	0.319583
ACTGATGTCACCACAA-1_1	Cancer_HGSOC1	4324	1649	14.2923	NA	NA	2	2	0.210433	Singlet	Tumor	T_cells	CD4T	-0.632307	-0.979557	-0.183229	-0.715512	0.193974	0.174982	-0.253718	-0.273749	0.677177	-0.900478	-0.780085	0.192219	-0.706347	-0.286013	-0.339814	-0.512925	-0.80086	-0.840838	-0.34198	-0.365553	-0.367442	-0.405218	-0.721823	-0.457491	-0.394845	-0.210813	-0.0994442	-0.464998	0.783172	0.474853	0.255775	-0.840844	-0.759306	-0.515019	-0.370102	-1.67043
ACTGCAAAGCGCTTCG-1_1	Cancer_HGSOC1	2391	1044	21.6228	NA	NA	4	4	0.168877	Singlet	Tumor	T_cells	T	-0.125853	-1.20045	-0.240681	-0.128393	-0.937342	-0.674749	-0.462596	-0.866799	-0.98331	-0.929951	-0.263814	-0.683067	-1.22633	-0.653666	-0.36397	-0.21105	-0.767192	-1.0611	-0.846007	-0.574833	-1.24171	-0.995409	-0.427732	0.00560197	-0.30462	-0.563082	-0.975311	-0.771681	0.613516	0.188185	-1.07901	-0.868086	-0.858255	-0.677653	-0.533991	-1.11854
ACTGCAAAGGTTGACG-1_1	Cancer_HGSOC1	4470	1797	4.51902	NA	NA	5	5	0.221043	Singlet	Tumor	T_cells	CD8T	-0.610317	-0.571447	0.597798	-0.40218	-0.69335	-0.323157	-1.38014	-0.269182	0.391822	0.0041867	-0.645566	-0.271317	-0.0713864	-0.392852	-0.413675	-0.691677	-0.595048	-0.928087	-0.257178	-0.553969	-1.06973	-0.841913	-0.40669	-0.071412	-0.175129	-0.457946	-0.612008	-0.623309	0.562029	0.181542	-0.625738	-0.457302	-0.0967387	-0.227846	-0.685837	0.387933
ACTGCAACACTCAAGT-1_1	Cancer_HGSOC1	6239	2320	8.20644	NA	NA	3	3	0.26702	Singlet	Tumor	T_cells	NK	-0.296894	-0.789998	0.635396	-0.294079	-0.74642	-0.574846	0.712984	0.443242	0.553368	-0.352991	-0.309306	0.470449	0.00468223	-0.24281	-0.112878	0.114155	0.132374	0.0130699	-0.16352	-0.383931	-0.283499	-0.257095	0.561972	0.2215	0.98021	-0.230071	1.09516	0.790271	0.900085	0.188256	0.196131	0.253106	0.122849	-0.468103	-0.439447	0.203224
ACTGCAAGTACTAGCT-1_1	Cancer_HGSOC1	71735	7298	15.5949	NA	NA	0	0	0.305924	Singlet	Tumor	Epithelial_cells	epithelial	-0.734303	1.95961	-0.486112	1.65614	0.268668	1.93457	2.01135	1.81476	-0.201387	2.22063	1.01204	0.762833	2.14194	3.11046	0.18358	2.5647	2.73894	1.67411	3.62606	1.82533	0.572324	2.09582	1.12403	0.843173	0.671429	-0.384768	-0.0400575	0.067897	-2.02349	-0.788601	3.48769	2.02105	1.99576	3.05311	1.73924	0.862591
ACTGCAAGTCACTGAT-1_1	Cancer_HGSOC1	3746	1541	8.2488	NA	NA	3	3	0.214854	Singlet	Tumor	NK_cell	NK	-0.573195	-0.386976	0.731839	-1.1956	-0.199945	-0.38068	0.829201	-0.199124	-0.44841	-0.126494	-0.354976	-0.260945	-0.305525	-0.614663	-0.083935	-0.699612	-0.787111	-0.421524	-0.70856	-0.358022	-0.326794	-1.14768	-0.0917469	-0.168661	-0.132857	0.225588	-0.112604	-0.201484	0.242487	1.12745	-0.370274	-0.611503	-0.755359	-0.740651	-0.357586	-0.0603333
ACTGCAATCACCACAA-1_1	Cancer_HGSOC1	109261	9961	16.0826	NA	NA	0	0	0.300619	Singlet	Tumor	Epithelial_cells	epithelial	4.4953	2.44341	0.215672	2.91495	2.91005	3.54676	2.78061	2.5263	0.444619	3.11284	2.77239	2.66223	2.06925	3.17659	1.69333	4.4092	4.23499	1.81564	3.64439	3.46909	3.1437	2.74071	3.50011	3.02805	1.86568	1.98673	1.13191	1.62928	-1.50683	2.12652	3.80494	3.12318	1.83781	3.23695	2.64619	2.12534
ACTGTCCAGGGATCAC-1_1	Cancer_HGSOC1	10693	3007	7.86496	NA	NA	1	1	0.330681	Singlet	Tumor	Macrophage	myeloid	-0.514802	0.125108	0.292735	0.827457	0.630382	-0.308974	1.44857	0.521159	0.741154	0.426427	0.639451	1.33012	0.261804	-0.0288164	0.167195	0.219617	0.561892	-0.571467	-0.00991503	0.163092	0.375273	0.117529	1.08908	0.650523	2.24397	1.49588	0.15193	0.349394	-0.419696	0.471452	1.0446	0.263778	0.307263	-0.515226	-0.373464	-0.620817
ACTGTCCCAACACACT-1_1	Cancer_HGSOC1	3944	1690	2.99189	NA	NA	3	3	0.180371	Singlet	Tumor	NK_cell	NK	-0.702354	-0.746397	0.627431	-0.695235	-0.385821	0.0490446	0.247029	-0.0185438	-0.611679	-0.417929	-0.311052	-0.0739361	-0.398435	-0.283903	-0.409796	-0.462296	-0.320823	-0.482034	0.0383757	-0.296777	0.0397637	-1.26337	-0.243748	0.461985	-0.540945	-0.196748	-1.21	-0.234538	0.583522	0.172615	-0.408804	-0.190626	-0.381701	-0.615713	-0.314883	-1.55614
ACTGTCCCAGTGTGCC-1_1	Cancer_HGSOC1	1508	778	20.8223	NA	NA	4	4	0.199823	Singlet	Tumor	NK_cell	T	1.65505	-1.1346	-0.841295	-1.21569	-0.494921	-1.0171	-0.807201	-1.49591	-1.08465	-1.35881	-0.596806	-1.42602	-0.951831	-0.44442	-0.654618	-0.290223	-0.696166	-1.13488	-0.590421	-1.25961	-1.10041	-1.04395	-1.27094	-1.54339	-0.679616	-0.966933	-1.45152	-1.20842	0.824406	-0.144753	-0.502072	-1.10859	-1.53718	-0.70908	-0.56969	-0.807529
ACTGTCCGTCACTAGT-1_1	Cancer_HGSOC1	4388	2032	6.44941	NA	NA	2	2	0.270557	Singlet	Tumor	T_cells	CD4T	0.472753	-0.580496	0.885345	-0.528667	-0.381043	-0.15477	-0.659811	-0.304884	0.236041	-0.613904	-1.23526	-0.861813	0.104847	0.185494	-0.538424	-0.127003	-0.0869902	-0.413627	0.138421	-0.961306	0.275982	0.159058	-0.273843	0.862195	0.17947	-0.250863	0.116397	-0.0810026	0.105164	-0.123364	0.450436	0.0536399	-0.177207	0.0303196	-0.298624	-0.321315
ACTGTCCGTCTGATAC-1_1	Cancer_HGSOC1	5371	2114	6.442	NA	NA	5	5	0.240495	Singlet	Tumor	T_cells	CD8T	-0.212632	-0.773134	0.887322	-0.752874	-0.0330934	-0.144277	-0.603803	-0.356614	-0.424669	0.569015	-0.864443	0.514969	-0.0347004	-0.250437	-0.43136	-0.0633951	-0.486489	-0.238016	-0.0290785	-0.462936	-0.565615	0.0391717	-0.517237	0.153393	0.170988	-0.450348	-0.670441	-0.353983	0.0311282	0.516635	-0.533164	-0.0948981	-0.331394	-0.822128	-0.504233	-0.156843
ACTGTCCGTGTTGACT-1_1	Cancer_HGSOC1	4117	1473	11.3918	NA	NA	1	1	0.309461	Singlet	Tumor	Macrophage	myeloid	0.972542	-0.530862	-0.253892	-0.821732	-0.0361198	-0.781364	-0.720746	-0.216733	-0.893618	-0.166569	0.929292	0.438863	-0.94925	-0.553666	-0.0871251	-0.513059	-0.739272	-0.883337	-0.32962	-0.722663	0.370836	-0.358283	-0.32292	-0.0295433	0.547324	0.643535	-0.611372	-0.537529	0.606113	1.04912	-0.454745	-0.249957	-0.569199	-0.725741	-0.585755	-0.0459528
ACTGTCCTCACTGTCC-1_1	Cancer_HGSOC1	4216	1737	8.5389	NA	NA	3	3	0.198055	Singlet	Tumor	NK_cell	NK	0.376116	-0.802201	0.047951	-0.0480139	-0.340705	-0.430628	-0.256847	-0.0233953	-0.525042	-0.607438	-0.819691	-0.0709688	-0.360531	-0.32056	-0.153887	-0.508401	-0.444449	-1.3133	-0.198414	-0.820408	0.518572	-0.542893	0.13942	0.644639	0.238409	0.319273	-0.665753	-0.483616	0.93058	0.597584	-0.334813	-0.381805	-0.712039	0.0865381	-0.0468289	0.624382
ACTGTCCTCCCATAAG-1_1	Cancer_HGSOC1	1199	754	16.8474	NA	NA	0	0	0.221043	Singlet	Tumor	NK_cell	epithelial	0.239196	-1.20665	-1.22746	-0.400612	-0.447874	-0.582829	-0.645847	-1.14145	0.262216	-0.321359	-0.24353	-1.42702	-0.907811	-0.415582	-0.484424	-0.395196	-0.455433	-0.797657	-0.534563	-0.978463	-1.08622	-1.04648	-0.85966	-1.2378	-0.486382	-0.709221	-1.33673	-1.4596	0.827973	-0.836344	-0.510121	-1.07035	-1.43028	-0.726417	-0.0372389	-0.74842
ACTGTGAAGATAACGT-1_1	Cancer_HGSOC1	11885	3276	9.63399	NA	NA	1	1	0.257294	Singlet	Tumor	Macrophage	myeloid	0.320893	0.970234	0.9264	1.23829	0.209825	0.0783572	-0.528527	0.942924	0.145909	0.222028	1.67367	1.58471	0.347997	-0.225473	0.257644	0.398374	0.772487	0.6287	-0.147379	-0.0661296	0.792582	1.14987	0.836866	1.13239	1.29087	1.17298	0.510813	0.597205	-0.350901	2.16089	0.208449	0.362078	0.00660356	-0.161547	0.66744	0.578492
ACTGTGAAGTGCTCAT-1_1	Cancer_HGSOC1	5818	2060	24.2179	NA	NA	1	1	0.314766	Singlet	Tumor	Monocyte	myeloid	0.190793	-0.315984	-0.291755	0.556761	1.07697	-0.245775	-0.22075	0.123772	1.23163	0.430252	1.8664	0.791559	-0.456011	-0.410844	0.200927	0.594643	0.128713	-0.667965	-0.479019	-1.00194	0.0687122	0.447046	0.129055	0.4279	-0.51011	1.55363	-0.622553	-0.513914	1.11316	0.339919	0.0349646	-0.454387	-0.973862	-0.425148	0.0928363	1.20446
ACTGTGACACCTCTGT-1_1	Cancer_HGSOC1	5688	2275	4.18425	NA	NA	3	3	0.150309	Singlet	Tumor	NK_cell	NK	-0.595775	-0.254127	0.751497	-0.236885	-0.108394	-0.0755998	0.346528	0.427792	1.53005	0.276366	-0.648576	-0.159814	-0.0432787	0.324456	-0.381082	-0.337982	-0.0202678	0.221973	0.164621	-0.716069	-0.332557	-0.469342	-0.0514138	0.898056	0.752922	-0.325269	-0.378455	-0.0462977	0.0533618	0.248299	0.59221	-0.131526	0.301348	0.0195946	-0.306367	-0.35051
ACTGTGACACTGGAAG-1_1	Cancer_HGSOC1	617	400	15.8833	NA	NA	4	4	0.204244	Singlet	Tumor	NK_cell	T	-0.103479	-1.33411	-1.42502	-1.20709	-0.611515	-0.973912	-0.51031	-1.44304	-0.448116	-1.15381	-0.525246	-1.54507	-1.03376	-0.815861	-0.593793	-0.755176	-1.00782	-1.30418	-1.0685	-0.963231	-0.892063	-1.16256	-1.68188	-1.09527	-1.08841	-0.989758	-0.343207	-0.564697	1.44014	-0.686793	-0.981322	-1.55355	-1.59924	-1.0496	-0.795814	-1.03199
ACTGTGACATGGGAAC-1_1	Cancer_HGSOC1	3193	1207	20.4823	NA	NA	1	1	0.272325	Singlet	Tumor	Monocyte	myeloid	-0.924282	-0.627139	-0.226546	-0.692471	-0.0935497	-0.885265	0.123256	-0.0179871	0.78217	-0.275752	0.441026	0.359239	-0.884754	-0.506983	-0.358628	-0.179462	-0.160431	-0.918461	-0.438248	-0.904103	-0.462786	-0.37931	0.177472	0.0895937	0.15546	0.744163	-1.17473	-0.909545	0.561775	0.0259939	-0.657879	-0.414427	-0.889955	-0.0137745	-0.147968	0.2981
ACTGTGAGTTAAGTCC-1_1	Cancer_HGSOC1	7233	1992	21.4296	NA	NA	1	1	0.289125	Singlet	Tumor	Macrophage	myeloid	-0.490572	-0.323848	0.201546	-0.721258	-1.17884	-0.265207	-0.503306	0.341642	0.784837	-0.0386446	0.571578	0.631605	-0.470523	-0.573307	0.215062	-0.124478	0.0526298	-0.782639	-0.0735493	-0.78027	-0.573138	-0.0888723	0.21514	0.656719	0.468423	1.32949	-0.793294	-0.307982	0.583786	1.77626	0.166534	-0.572932	-0.7157	-1.03504	0.338857	0.0403323
ACTGTGATCTAGCCTC-1_1	Cancer_HGSOC1	14482	4036	11.3037	NA	NA	1	1	0.259947	Singlet	Tumor	Macrophage	myeloid	-1.29547	1.02801	1.42071	1.30173	-0.789899	0.228563	-0.911235	1.31722	0.12337	1.0343	1.52843	2.10538	0.521774	0.40024	0.155503	0.213333	1.00445	0.620738	0.480807	0.48538	-0.814734	0.388968	0.797734	0.761831	1.92117	3.15393	0.625155	1.00065	0.125461	2.03248	1.08617	0.527526	0.816867	0.0864401	-0.000458739	1.44407
ACTGTGATCTATACTC-1_1	Cancer_HGSOC1	15135	3847	5.64255	NA	NA	1	1	0.2458	Singlet	Tumor	Macrophage	myeloid	-1.2842	1.06366	0.638057	0.920548	0.429354	0.368055	-0.613104	1.23746	-0.537945	0.999045	1.94299	2.02602	0.693249	-0.0356215	0.125149	0.267737	0.472687	0.723754	0.424535	0.49768	0.498256	1.08694	1.33584	1.07864	2.29027	2.8636	0.690129	0.878175	-0.642635	2.09291	0.868779	0.544223	0.87915	1.10249	0.675807	0.0527144
ACTTAGGAGAACGCGT-1_1	Cancer_HGSOC1	33491	3731	2.46036	NA	NA	8	8	0.231653	Singlet	Tumor	T_cells	B	-0.650975	0.606122	1.72488	0.863628	-0.885859	-0.224154	0.197184	0.768255	-0.470189	-0.0489279	-0.348373	0.956062	0.698916	0.264598	-0.424331	-0.10034	0.0080243	-0.269456	0.507779	0.37793	-0.128274	0.819249	0.903269	1.50288	1.18654	0.806743	0.517507	0.958619	-1.46059	1.41003	0.647247	0.877986	0.623168	0.451702	-0.102226	-0.10511
ACTTAGGCAACCGTAT-1_1	Cancer_HGSOC1	12357	3287	9.54924	NA	NA	2	2	0.215738	Singlet	Tumor	T_cells	CD4T	-1.13305	0.479412	1.17064	0.455748	-0.605108	-0.225174	0.945195	0.604353	-0.00550201	0.104946	-0.768529	0.524517	0.863771	0.455668	-0.944407	0.118504	0.177284	0.744276	0.65434	0.334128	0.325624	0.297766	0.605808	0.661672	-0.213531	0.305743	0.856901	1.02813	-0.307045	0.128392	0.589053	0.779872	0.987604	0.898559	-1.0405	-1.01185
ACTTAGGCATGTCGTA-1_1	Cancer_HGSOC1	6509	2348	5.26963	NA	NA	5	5	0.246684	Singlet	Tumor	T_cells	CD8T	0.608596	0.181581	1.27964	0.218486	-0.633068	-0.58848	1.37243	-0.0181586	0.0824141	-0.602019	-0.965784	0.262052	-0.435998	-0.290754	-0.399048	-0.0197684	-0.193778	0.0617679	0.0947412	-0.30505	0.071881	0.0953173	-0.0659941	0.40334	-0.714666	-0.0303696	-0.183636	0.371044	-0.597633	-0.0163671	0.123623	-0.1182	-0.0285562	-0.921192	-0.394646	-0.731835
ACTTAGGGTGCCTGCA-1_1	Cancer_HGSOC1	5613	2033	19.1876	NA	NA	0	0	0.261715	Singlet	Tumor	Epithelial_cells	epithelial	0.407766	-0.43414	-1.29731	-0.179769	0.842333	0.0959493	0.619828	-0.364377	-0.420389	-0.116805	0.0279774	-0.676401	-0.413621	-0.2579	-0.316147	0.642676	0.288448	-0.645012	-0.27617	-0.198769	0.250416	-0.190743	0.201799	-0.912853	-0.0245959	-0.861884	-1.01133	-1.28737	0.10448	-1.69119	-0.0853822	-0.591352	-0.36595	-0.0129629	0.411158	-0.411211
ACTTATCAGGAACGAA-1_1	Cancer_HGSOC1	68293	8284	18.1043	NA	NA	0	0	0.316534	Singlet	Tumor	Epithelial_cells	epithelial	2.25788	2.11225	-0.805395	1.82384	1.46275	2.88622	2.24016	1.85544	3.02535	2.22637	1.14759	0.646592	2.00228	1.48286	0.213496	3.94261	2.82598	2.28848	1.78971	1.58287	2.86303	1.94431	1.41088	1.07522	-0.254786	-0.312466	0.100491	0.170041	-1.25431	-1.58613	2.34071	1.83427	1.76566	3.16159	1.42288	0.979493
ACTTATCAGGGCTTCC-1_1	Cancer_HGSOC1	13014	3408	7.56109	NA	NA	1	1	0.236958	Singlet	Tumor	Macrophage	myeloid	-2.29496	0.485521	0.670582	0.487962	-0.0999911	0.0632953	-0.884197	0.833139	-0.0329043	-0.0357143	0.559829	0.607652	-0.0897779	-0.201486	-0.63677	0.199033	0.242	0.148625	0.224778	-0.00183282	1.33448	0.354931	0.463347	1.12245	0.941819	1.4424	0.618068	0.393243	-0.810251	1.25858	0.692203	0.613515	0.602892	0.18118	-0.26457	-0.241603
ACTTATCGTTGAGGAC-1_1	Cancer_HGSOC1	6564	1925	16.1792	NA	NA	1	1	0.282051	Singlet	Tumor	Macrophage	myeloid	0.524047	-0.0540072	0.0601047	-0.173373	1.21267	0.555948	1.26327	0.371663	0.449139	-0.0555805	0.563254	-0.0341394	-0.916799	-0.586045	-0.122099	-0.0115054	0.00374345	-0.411491	-0.305777	-0.456202	1.33429	0.913609	0.475259	0.750867	0.620092	1.54057	-1.00241	-0.395869	0.36321	2.13402	0.0676207	0.0245425	-0.60421	0.077001	0.568216	0.219781
ACTTATCTCCGTTTCG-1_1	Cancer_HGSOC1	1800	936	21.1667	NA	NA	4	4	0.206012	Singlet	Tumor	NK_cell	T	-0.652018	-1.13775	-0.0167897	-0.460317	-0.262583	-0.52271	-0.895384	-1.28192	-0.478925	-1.04631	-0.937189	-1.01653	-1.23852	-0.725438	-0.584659	-0.371947	-0.628207	-1.08585	-0.737737	-0.993078	-0.420002	-0.497381	-0.538991	-1.01721	-0.74504	-0.513317	-1.36968	-1.49385	0.86098	0.240248	-0.453051	-1.29551	-0.878844	-0.703325	-0.549419	-0.55879
ACTTATCTCCTTCAGC-1_1	Cancer_HGSOC1	4343	1704	9.57863	NA	NA	3	3	0.225464	Singlet	Tumor	NK_cell	NK	-0.690007	-0.926587	-0.12926	-0.521809	0.0290896	-0.810436	0.233836	-0.647578	-1.19781	-0.531633	-0.846223	-0.302903	-0.547119	-0.556676	-0.417894	-0.466386	-0.361726	-0.749081	-0.33588	-1.04747	-0.361719	-0.853811	-0.484454	-0.0815727	-0.606614	-1.09944	-1.04954	-0.814826	-0.044659	0.338715	-0.614703	-0.721646	-0.293012	-0.408188	-0.523962	-0.102825
ACTTCCGGTACCGGCT-1_1	Cancer_HGSOC1	4643	1774	10.1443	NA	NA	3	3	0.272325	Singlet	Tumor	NK_cell	NK	0.0562365	-0.453885	-0.199122	-0.0841288	0.0756197	-0.683866	-0.395908	-0.336553	-0.690879	0.103718	-0.540758	0.141835	-0.312424	-0.394227	-0.368376	-0.0682039	-0.258544	-0.493836	0.0307986	-0.421796	-0.854901	-0.842871	0.690991	0.703427	-0.0419098	-0.0826206	-0.897271	-0.822259	0.223832	0.192189	-0.38413	0.120488	-0.516875	-0.941005	-0.28423	-0.0430021
ACTTCGCAGTGGAATT-1_1	Cancer_HGSOC1	7825	2435	9.78914	NA	NA	1	1	0.247569	Singlet	Tumor	Macrophage	myeloid	1.57172	0.24333	0.540405	0.164043	-0.150695	0.0757431	-0.929156	0.129806	-1.56625	0.307348	0.683132	-0.0344538	0.133254	-0.227154	-0.284501	-0.617275	-0.212395	-0.0237517	-0.134181	-0.832595	0.882598	0.424688	0.261035	0.675575	1.71135	1.86817	1.04947	0.592437	-0.112925	2.42101	0.442449	0.136131	0.0203233	-0.0804041	-0.346445	0.362082
ACTTCGCCACATCCCT-1_1	Cancer_HGSOC1	12820	3587	16.9735	NA	NA	7	7	0.241379	Singlet	Tumor	GMP	CD8T	1.22024	-0.0578552	0.44052	0.442117	-0.243843	0.346193	1.19155	0.340251	-0.351556	-0.590177	-0.998394	0.000988324	0.468617	2.39425	-0.19994	-0.164286	0.475152	-0.735786	2.21559	-0.285912	0.143196	0.115971	-0.0951046	1.01351	0.207079	-0.264921	0.229719	0.420098	-0.498471	0.220341	2.35294	0.699733	0.781328	0.597711	-0.126633	-1.19046
ACTTCGCCACGCTTAA-1_1	Cancer_HGSOC1	5417	1516	15.2668	NA	NA	2	2	0.229001	Singlet	Tumor	T_cells	CD4T	-1.22624	-1.01991	-0.173993	-0.338199	-0.41495	-0.32031	-0.662779	-0.546145	-0.605485	-0.22109	-0.330018	-0.78476	-0.260202	-0.285866	-0.587266	-0.363349	-0.626772	-0.563629	-0.34418	-0.852753	0.338718	-0.599499	-0.0858627	0.0459627	-0.338764	-0.22222	-1.24512	-0.962398	0.119349	-0.231963	-0.5557	-0.675596	-0.356015	-0.158676	-0.581654	0.0252471
ACTTCGCCAGACCTAT-1_1	Cancer_HGSOC1	7011	2657	7.21723	NA	NA	5	5	0.244916	Singlet	Tumor	T_cells	CD8T	-0.726564	0.0870086	1.05613	-0.283141	-0.565099	-0.490774	-1.0996	-0.317092	-0.272135	-0.227158	-0.893232	0.542635	-0.139179	0.0351385	-0.59205	-0.462093	-0.338028	-0.133854	0.37597	-0.429027	0.537589	-0.108228	-0.416498	0.0654088	-0.244394	0.610891	1.15876	0.879675	-0.0452079	-0.225788	0.532752	-0.169447	0.0980752	-0.118199	-1.00599	-0.278426
ACTTCGCGTGAACCGA-1_1	Cancer_HGSOC1	7183	2082	23.848	NA	NA	1	1	0.322723	Singlet	Tumor	Macrophage	myeloid	0.526998	-0.0183468	-0.0395643	0.43819	0.191306	-0.128915	-0.0875958	0.195686	-1.00768	0.077643	1.08606	0.854641	-0.541464	-0.257068	-0.209559	-0.0212023	0.118756	-0.985233	-0.544445	-0.27212	0.30413	-0.0969941	0.610795	0.231458	0.102266	1.16006	-0.209504	-0.202334	0.419244	0.398603	0.167555	0.227352	-0.368923	-0.0196195	0.0421442	-1.05343
ACTTCGCTCCCGTGTT-1_1	Cancer_HGSOC1	1817	892	14.9697	NA	NA	4	4	0.183908	Singlet	Tumor	T_cells	T	0.404542	-0.932365	-0.954205	-0.999197	-0.638546	-0.264484	-1.04879	-1.25927	-0.755131	-0.924842	-0.517638	-1.17718	-1.09835	-0.671537	-0.751863	-0.501443	-0.811327	-1.02581	-0.714008	-0.855554	-0.41888	-0.675507	-1.05019	-0.880032	-0.878582	-0.876161	-1.29436	-1.34526	0.785524	-0.068389	-0.533526	-1.20037	-1.15207	-0.867781	-0.453623	-1.01674
ACTTTCAAGACCAGAC-1_1	Cancer_HGSOC1	13341	3492	6.23641	NA	NA	1	1	0.238727	Singlet	Tumor	Monocyte	myeloid	0.517932	0.916741	1.09731	0.906164	0.35249	0.537716	0.559038	1.21666	0.0340898	0.495609	1.58523	1.70621	0.454664	0.0854295	0.082772	0.0545234	0.36415	0.685061	0.343048	0.596592	0.931331	0.609494	1.53088	0.866437	2.38514	2.45345	0.655295	0.826649	-0.606353	2.06106	0.581267	0.662198	0.160432	0.424407	0.86787	0.156264
ACTTTCAAGTTAACGA-1_1	Cancer_HGSOC1	4228	1528	7.89972	NA	NA	2	2	0.199823	Singlet	Tumor	T_cells	CD4T	-1.01012	-0.724512	-0.00110693	-0.992535	-0.62437	-0.367163	-0.480464	-0.385068	-0.398642	-0.575978	-0.757248	-0.561994	-0.294541	-0.462847	-0.428411	-0.146436	-0.395943	-0.328648	-0.450299	-0.782537	-0.737538	-0.318421	-0.222127	-0.0741498	-1.10471	-0.167891	-0.931357	-0.992184	-0.130351	-0.247889	-0.469141	-0.297591	-0.249951	-0.16263	-0.741752	-0.946235
ACTTTCACAAATCAGA-1_1	Cancer_HGSOC1	6913	2168	8.75163	NA	NA	1	1	0.254642	Singlet	Tumor	Monocyte	myeloid	0.00819329	-0.204283	0.472395	-0.28827	0.0756253	-0.505781	0.205511	0.0403919	-1.40357	-0.159074	1.43873	1.36575	-0.11374	-0.364885	-0.121841	-0.171861	-0.55612	-0.733786	-0.0369952	-0.421115	0.505988	-0.234477	0.788947	-0.141287	0.639858	1.06265	-0.401458	-0.111291	-0.0389252	1.14101	0.0449779	-0.298582	-0.646293	-0.863879	0.420379	0.470326
ACTTTCACACCTTCGT-1_1	Cancer_HGSOC1	1048	602	4.10305	NA	NA	4	4	0.214854	Singlet	Tumor	NK_cell	T	-0.304124	-1.26242	-0.455558	-0.861136	-0.27811	-0.799917	0.457921	-0.795513	-0.810332	-0.769601	-0.399144	-0.867175	-1.36839	-0.99289	-0.574438	-0.71228	-0.886006	-1.16984	-0.989258	-1.22968	-0.657745	-0.98425	-1.2062	-0.94763	-1.51086	-0.658549	-1.56445	-1.66032	0.971581	-0.418004	-0.819643	-1.05328	-1.43056	-0.885475	-0.657903	-1.13798
ACTTTCACACGGAAGT-1_1	Cancer_HGSOC1	1617	759	24.428	NA	NA	4	4	0.218391	Singlet	Tumor	NK_cell	T	0.548154	-1.1144	-0.507566	-0.955438	-0.373933	-0.989559	-0.315942	-0.535821	-0.934804	-0.66283	0.0200024	-0.680513	-1.08798	-0.785635	-0.428263	-0.589094	-0.936659	-1.10254	-0.625652	-0.941595	-1.08759	-0.682298	-0.4468	-0.427467	-0.90621	-0.174654	-1.02955	-0.933585	1.13168	0.477074	-1.12405	-1.129	-1.73965	-0.518066	-0.528483	-0.61386
ACTTTCAGTTATGGTC-1_1	Cancer_HGSOC1	26236	4748	11.5528	NA	NA	0	0	0.305924	Singlet	Tumor	Epithelial_cells	epithelial	0.157137	0.949843	-0.057481	1.58218	0.518544	1.74896	2.90252	1.68138	0.76461	1.87042	0.283231	1.29893	0.88028	1.03078	0.452459	2.49023	2.23944	1.02675	1.18986	1.30479	1.10284	1.02591	1.81882	1.43448	1.6979	1.34128	0.433593	0.999764	-0.386162	0.536093	0.828583	1.33461	1.30769	2.86802	2.40546	0.708213
ACTTTCATCAAACCCA-1_1	Cancer_HGSOC1	9580	2711	6.48225	NA	NA	12	12	0.312113	Singlet	Tumor	Monocyte	B	-0.0407205	-0.22613	0.463135	-0.543487	-0.00952289	-0.687809	1.43805	-0.0909936	-0.142367	-0.671433	-0.539051	0.498621	0.129144	-0.0415099	-0.458302	-0.0981639	-0.310076	0.043935	0.318922	0.0605613	-1.4225	0.260836	0.843732	-0.236495	1.53814	0.133308	0.429321	0.910978	0.717115	0.417784	0.223639	0.493877	0.372114	-0.316788	-0.526515	0.580668
ACTTTGTAGATGCCGA-1_1	Cancer_HGSOC1	57045	7695	18.9377	NA	NA	0	0	0.340407	Singlet	Tumor	Epithelial_cells	epithelial	-0.605434	1.74545	-0.323706	2.10548	1.25942	2.38663	-0.147824	2.06621	0.694512	1.80269	0.811231	0.943994	1.05321	1.0701	0.421691	3.24547	2.4179	1.0406	1.20526	1.08247	1.46967	2.47946	1.52038	1.78395	1.66021	0.428415	0.920293	1.10225	-1.67561	-0.829283	2.25846	1.92555	1.53447	2.22506	2.12043	1.21573
ACTTTGTAGCACTCCG-1_1	Cancer_HGSOC1	108566	8603	18.4993	NA	NA	0	0	0.301503	Singlet	Tumor	Epithelial_cells	epithelial	1.96521	2.55449	-0.384098	2.65627	1.51992	2.14259	2.27	2.18999	2.00762	2.23639	1.39546	1.40287	1.96171	1.18945	0.359671	3.18431	3.01855	2.20394	1.47367	2.84237	1.49356	2.91256	2.05317	0.837653	1.34787	0.263412	0.977197	1.44267	-0.768994	-0.419412	2.42552	2.11269	1.76246	2.38407	1.96704	1.24128
ACTTTGTAGGTTCTTG-1_1	Cancer_HGSOC1	7917	2287	20.9928	NA	NA	0	0	0.282051	Singlet	Tumor	Epithelial_cells	epithelial	1.36858	-0.154034	-0.280201	0.25038	0.614781	0.194463	-1.08589	0.318871	-0.913051	-0.310651	0.208277	-0.936156	-0.283004	-0.381833	0.00725054	0.7663	0.419241	-0.48842	-0.279874	-0.424297	-1.09992	0.779883	0.00314445	0.020504	0.555434	0.840207	-0.603983	-0.273539	0.613445	-1.23377	-0.0565436	-0.191362	-0.383152	0.317179	0.149845	-0.298883
ACTTTGTGTCGCTTGG-1_1	Cancer_HGSOC1	1379	786	14.6483	NA	NA	4	4	0.206012	Singlet	Tumor	NK_cell	T	1.34867	-1.05491	-0.560944	-1.09256	-0.550538	-0.582756	0.490551	-1.25039	0.0987706	-0.566541	-0.701449	-1.44421	-1.27	-0.733527	-0.598965	-0.455207	-0.939417	-1.18436	-0.530233	-0.987618	0.714432	-0.820694	-0.716622	-0.820587	-1.12519	-0.294013	-1.26605	-1.23731	1.4678	-0.32538	-0.503089	-1.07838	-1.2138	-0.243337	-0.503034	-0.0416115
ACTTTGTGTGAGATAT-1_1	Cancer_HGSOC1	4621	1580	6.83835	NA	NA	2	2	0.236958	Singlet	Tumor	T_cells	CD4T	1.12427	-0.421502	0.121617	-0.775277	-0.541397	-0.422974	-0.886107	-0.955723	0.114872	-1.27681	-0.631842	-0.386688	-1.00115	-0.434497	-0.434647	-0.319941	-0.247741	-0.243322	-0.330004	-0.216891	-0.809764	-0.368158	-0.0369679	0.189812	-0.708734	-0.0048356	-0.978115	-0.906752	-0.239108	-0.522483	-0.501334	-0.447702	-0.121168	-0.0031232	-0.212822	-0.654075
ACTTTGTTCACCATCC-1_1	Cancer_HGSOC1	4394	1905	13.7233	NA	NA	7	7	0.241379	Singlet	Tumor	T_cells	CD8T	-1.23624	-0.202902	0.592355	0.159302	0.87911	-0.387835	-0.632153	-0.0649287	-0.878682	0.595442	0.132383	0.481189	-0.246201	0.45791	-0.36242	-0.0738065	0.308438	-0.322167	0.880525	-0.047022	-1.27724	-0.111734	-0.124608	0.313584	-0.163647	-0.0464952	-1.22911	-0.711308	0.223328	-0.0316325	0.193408	0.191485	0.15599	0.348921	-0.931254	-1.6911
ACTTTGTTCCTCAGGG-1_1	Cancer_HGSOC1	4262	1569	7.69592	NA	NA	5	5	0.197171	Singlet	Tumor	NK_cell	CD8T	-0.221249	-0.677746	0.392147	-0.872197	-0.847288	-0.519485	0.120425	-0.439176	0.132142	-0.596203	-0.994347	-0.137721	-0.201045	-0.51955	-0.296024	-0.564476	-0.746198	-0.385241	-0.43162	-0.172914	-0.187966	-0.316289	0.00534411	-0.454996	0.596828	-0.302422	0.580865	1.05261	0.97414	0.203976	-0.360235	-0.61772	-0.527548	-0.747421	-0.399874	0.0584087
AGAAATGCACATTCGA-1_1	Cancer_HGSOC1	2415	1114	16.2319	NA	NA	3	3	0.21397	Singlet	Tumor	NK_cell	NK	-0.86718	-1.00752	0.135057	-1.01945	-0.156547	-0.9782	0.0989253	-0.901393	0.0972661	-0.308731	-0.629783	-0.627336	-0.836845	-0.735034	-0.529983	-0.580245	-0.900497	-0.908936	-0.545346	-1.17212	-0.539227	-0.452258	-0.774345	0.425777	0.347876	-0.031345	-1.50838	-0.643405	0.453627	-0.193853	-0.551402	-0.860319	-0.669722	-0.571944	-0.508876	-1.15291
AGAAATGCATGGAATA-1_1	Cancer_HGSOC1	14264	3423	23.654	NA	NA	0	0	0.316534	Singlet	Tumor	Epithelial_cells	epithelial	1.53388	0.498129	-0.847336	1.29338	-0.184005	0.928688	1.01118	0.875856	0.174345	0.843289	0.529805	0.12029	-0.0908161	-0.166799	0.0982453	1.61721	1.6875	-0.106565	0.228778	0.0260915	0.196457	1.13338	0.564458	0.306839	-0.0346016	0.414599	0.355105	0.383308	1.32807	-0.389449	0.506285	0.366515	0.177899	0.131754	0.744361	-1.24651
AGAAATGGTTGCTCCT-1_1	Cancer_HGSOC1	32870	5736	18.6127	NA	NA	0	0	0.298851	Singlet	Tumor	Epithelial_cells	epithelial	-0.423218	1.82947	-0.773843	2.05546	0.877869	1.62855	1.61219	1.5336	0.161324	1.87966	0.703677	0.485263	0.946381	1.50312	-0.268883	2.43524	2.29359	1.25047	1.76197	0.523138	1.4695	1.90048	0.855755	0.955577	0.0228801	-0.0400218	0.2049	0.0805943	-1.29704	-0.798271	2.14325	1.57899	1.45859	1.50541	0.889866	-0.252313
AGAAATGTCGATACAC-1_1	Cancer_HGSOC1	10995	2960	12.5239	NA	NA	1	1	0.238727	Singlet	Tumor	Macrophage	myeloid	-0.454404	0.252898	1.15989	0.341898	0.20831	-0.192051	-0.526994	0.751832	-0.223213	0.39772	1.68447	1.49604	0.277913	-0.189181	0.0863763	-0.325483	-0.122235	0.210311	0.108177	0.177496	0.797461	0.663404	1.07665	1.19062	2.13303	1.41245	0.605125	0.975391	0.292927	1.8191	0.0740387	0.243534	0.39017	0.00996304	0.0729442	1.48031
AGAAATGTCGTTCCCA-1_1	Cancer_HGSOC1	4355	1798	8.47302	NA	NA	5	5	0.236074	Singlet	Tumor	T_cells	CD8T	0.988684	-0.400346	0.369163	-0.779379	-1.14882	-0.0915371	-0.593106	-0.331158	-0.580349	-0.405407	-0.739399	-0.45267	-0.176932	-0.551737	-0.29247	-0.419191	-0.425673	0.0240139	-0.12956	-0.246952	-0.649639	0.361424	0.0409487	0.355439	-0.434119	0.789653	-0.391494	-0.549619	0.165896	0.121969	-0.220635	-0.0886894	-0.465711	-0.414809	-0.218478	0.180713
AGAAATGTCTACGCGG-1_1	Cancer_HGSOC1	16707	2378	3.5554	NA	NA	15	15	0.219275	Singlet	Tumor	B_cell	B	-0.00113601	-0.0407416	-0.0140604	0.513592	-0.0768874	-1.02651	-0.690759	-0.257981	0.791239	-0.244798	-0.0953878	-0.537795	-0.0127908	-0.405608	-0.289699	-0.310834	-0.179373	-0.218616	-0.164855	-0.050099	-0.161249	0.443963	-0.042246	-0.860418	0.297972	-0.180049	-0.278568	0.11482	-0.25044	0.0995787	0.383865	0.102017	0.0119904	-0.275075	-0.307608	1.29405
AGAACAAAGCTACTGT-1_1	Cancer_HGSOC1	3518	1434	8.30017	NA	NA	3	3	0.216622	Singlet	Tumor	NK_cell	NK	-0.539361	-0.588736	-0.212108	-0.349407	-0.159557	-0.445856	-0.598616	-0.194565	-1.36925	-1.00345	-0.646495	-0.366814	-0.62278	-0.640859	-0.229011	-0.640861	-0.275101	-1.02461	-0.292291	-0.666527	0.36746	-0.929427	-0.175335	0.213124	-0.122921	0.438114	-0.633316	-0.398457	0.547893	-0.43179	-0.431931	-0.910115	-0.711645	-0.79559	-0.171904	-0.136167
AGAACAAAGTGAGCCA-1_1	Cancer_HGSOC1	33088	3410	5.11666	NA	NA	15	15	0.215738	Singlet	Tumor	B_cell	B	-1.23126	0.626345	0.0677417	0.236043	-1.09475	-0.264475	-0.729562	0.431448	-0.854717	0.53887	-0.512967	-0.233279	0.859661	0.196964	-0.647568	-0.464625	-0.147059	0.584347	0.805732	0.683956	-1.15624	1.17683	0.460373	-0.669989	0.146336	-0.265894	0.202545	0.420016	-0.211463	-1.31967	0.0956227	1.24396	0.917031	0.735443	-0.571653	0.334149
AGAACAACAAACACGG-1_1	Cancer_HGSOC1	5549	2045	7.15444	NA	NA	3	3	0.173298	Singlet	Tumor	NK_cell	NK	-0.0714244	-0.104559	0.693364	0.521818	-0.45686	-0.163445	-0.403415	-0.423612	-0.00249742	0.494406	-0.844255	-0.66356	0.388226	-0.406137	-0.613343	-0.223086	-0.25268	0.0981567	-0.0434745	-0.756169	0.147559	-0.761369	-0.212244	0.638663	0.0143813	-0.0986211	-0.564754	-0.464487	-0.0577702	-0.257395	-0.135906	-0.285247	-0.100738	-0.38229	-0.0673468	-0.130745
AGAACAACACACACGC-1_1	Cancer_HGSOC1	4669	2073	9.42386	NA	NA	3	3	0.191866	Singlet	Tumor	NK_cell	NK	1.60231	-1.13056	0.498429	-0.527867	-0.136093	-0.335873	0.0901921	-0.584533	0.197293	-0.620046	-0.604287	0.532924	-0.0274587	-0.44068	-0.497188	-0.369908	-0.350734	-0.712718	-0.336827	-0.380936	-0.550216	-0.455502	-0.0443159	0.211155	0.191121	-0.23506	-1.23891	-0.500211	-0.187513	-0.141075	0.0309271	-0.0152347	-0.436	0.340028	-0.239783	0.753411
AGAACAACACTTGTGA-1_1	Cancer_HGSOC1	3471	1334	17.8623	NA	NA	5	5	0.213086	Singlet	Tumor	T_cells	CD8T	-0.366505	-1.02854	0.161161	-1.25421	-0.66324	-0.00749053	0.0945467	-0.46002	-0.422264	-0.850201	-0.674057	-0.364027	-0.790794	-0.590742	-0.362054	-0.161667	-0.420171	-0.855158	-0.437478	-0.84886	0.502533	-0.539395	-0.805906	-0.822509	-0.441222	-0.589151	-0.73804	-1.00906	0.33258	-0.283257	-0.327518	-0.727573	-0.61644	-0.103091	-0.435444	-0.280671
AGAACAACAGAGGAAA-1_1	Cancer_HGSOC1	8022	2514	13.7248	NA	NA	1	1	0.306808	Singlet	Tumor	Monocyte	myeloid	-0.671963	0.401692	1.22732	0.173314	0.289594	0.311241	0.9364	0.0213599	-1.8713	0.0792166	1.10504	1.20996	-0.352532	-0.364381	0.253233	-0.270704	-0.151475	-0.160789	-0.260649	-0.00444995	1.89725	0.298694	1.01426	1.51425	1.76729	2.82983	-0.942235	0.240064	0.508835	3.00402	0.470377	0.0662185	0.0366054	-0.792613	0.673519	0.665656
AGAACAACAGATTCGT-1_1	Cancer_HGSOC1	9753	1923	7.22855	NA	NA	8	8	0.227233	Singlet	Tumor	B_cell	B	0.272856	-0.466945	-0.19999	-0.501739	-0.640872	-0.885282	-1.61563	-0.236003	-0.460035	-0.49716	-0.113284	-0.0601628	-0.15977	-0.584821	-0.12973	-0.699965	-0.314359	0.19306	-0.520372	-0.226465	-1.47558	-0.341601	0.0986923	-0.322598	0.447109	0.381639	-0.487394	-0.0151945	-0.459712	-0.730196	-0.534675	-0.155314	-0.124386	-0.670805	-0.264968	-0.207474
AGAACAAGTATTGACC-1_1	Cancer_HGSOC1	6612	2403	6.53358	NA	NA	2	2	0.251105	Singlet	Tumor	T_cells	CD4T	-1.8841	0.374618	1.21956	-0.278055	-0.428678	-0.557212	0.595845	-0.0756882	1.28232	0.108107	-1.16462	-0.154729	0.250257	-0.0797841	-0.465701	-0.409172	0.120413	-0.449128	0.394799	-0.319172	-1.26972	0.40931	0.138306	0.644928	0.881973	0.775255	-0.33646	-0.109786	-0.478339	1.08958	-0.172294	0.374694	0.375512	-0.62186	-1.49264	-1.17299
AGAACAAGTGCGGCTT-1_1	Cancer_HGSOC1	1664	720	20.613	NA	NA	4	4	0.221043	Singlet	Tumor	NK_cell	T	-0.42975	-1.08192	-1.37652	-1.3668	-0.493496	-1.0694	-1.30189	-0.623223	0.314192	-1.17382	-0.740305	-0.959029	-1.26963	-0.796187	-0.253903	-0.593806	-0.593531	-1.15819	-0.776946	-0.693659	0.131645	-0.943054	-0.922179	-0.730464	-1.2056	-0.716934	-1.25701	-1.29201	1.2797	-0.764551	-1.20585	-1.13689	-1.18666	-0.675142	-0.466753	-1.2011
AGAACAAGTGGTCCGT-1_1	Cancer_HGSOC1	1669	700	1.55782	NA	NA	3	3	0.2458	Singlet	Tumor	NK_cell	NK	0.758144	-0.616602	-0.359072	-1.1214	0.0147402	-0.579148	0.0252463	-1.1616	-0.312569	-0.738783	-0.377188	-0.974392	-0.590278	-0.685441	-0.363379	-0.861594	-0.735318	-0.889468	-1.18764	-0.900666	-1.08471	-0.683037	-1.40886	-1.42445	-1.54269	-0.531646	-1.06538	-1.53556	0.836382	0.124465	-1.29599	-1.08045	-0.769186	-0.40548	-0.977348	-0.52745
AGAACAATCATACAGC-1_1	Cancer_HGSOC1	29698	5894	15.8226	NA	NA	0	0	0.292661	Singlet	Tumor	Epithelial_cells	epithelial	-0.452992	1.95573	-0.194358	1.98396	1.05491	2.14684	0.431619	1.37162	2.3251	1.78463	1.66629	1.60622	0.45599	0.660009	0.0669545	2.084	2.4637	1.5251	0.807975	1.3819	0.845011	2.46335	1.03703	0.472969	0.37973	-0.0902755	-0.0986856	0.345759	-0.31424	-0.839571	1.72202	1.10141	1.01756	1.70564	2.05565	1.13992
AGAACAATCATTTCCA-1_1	Cancer_HGSOC1	5116	2088	6.07897	NA	NA	3	3	0.176835	Singlet	Tumor	NK_cell	NK	-0.497594	-0.0263455	1.10538	-0.172369	-0.643526	-0.618958	1.70885	0.0956176	-0.929286	-0.446075	-0.744682	-0.136832	-0.57899	-0.146637	-0.260161	-0.331115	-0.445779	0.0278594	0.28399	-0.566237	0.375571	0.11237	-0.336316	0.407022	0.45033	0.208493	0.488131	0.91061	0.714084	0.229536	0.0980743	-0.310699	-0.0184339	0.379129	-0.457556	0.905462
AGAACCTCAAATGATG-1_1	Cancer_HGSOC1	8664	2967	3.48569	NA	NA	3	3	0.156499	Singlet	Tumor	NK_cell	NK	-1.72672	-0.0687077	0.915162	-0.45805	-1.04395	-0.360434	0.164913	-0.307517	-0.413456	0.699164	-0.602026	0.466337	-0.0228102	0.243603	-0.672429	-0.45622	0.14403	-0.226388	0.453785	-0.516485	-0.558776	0.805291	0.1496	0.24284	0.667426	0.376801	1.21015	0.931466	0.534734	-0.286292	-0.100071	0.24228	0.118934	0.211063	-0.880312	-1.02824
AGAACCTGTGCGGCTT-1_1	Cancer_HGSOC1	1023	622	9.57967	NA	NA	5	5	0.251105	Singlet	Tumor	NK_cell	CD8T	-0.315494	-1.11428	-0.427012	-0.631133	0.212714	-0.630996	-1.23355	-0.841622	-0.167655	-0.500717	-0.234936	-0.46265	-1.04062	-0.740389	-0.363178	-0.496745	-0.458002	-0.695338	-0.910893	-0.908018	-0.371707	-1.04396	-0.989085	-0.610838	-0.609663	-0.336782	-1.59765	-1.2822	1.27068	0.0672008	-1.00475	-0.992065	-1.25246	-0.671124	-0.67036	-0.145347
AGAACCTTCATGAAAG-1_1	Cancer_HGSOC1	17403	5260	6.21157	NA	NA	1	1	0.33687	Singlet	Tumor	Epithelial_cells	myeloid	1.05526	0.963584	0.508617	1.8732	0.893362	1.72734	3.61878	1.76325	1.07447	0.737259	1.01581	1.62392	0.767349	0.429236	0.40436	2.05908	2.02604	0.426527	0.864434	0.878726	1.56662	2.3629	1.62235	1.42042	1.11068	1.43918	0.344655	0.262122	-0.707579	1.70193	1.43438	1.31013	0.841905	-0.261513	1.16234	0.284411
AGAACCTTCTCGGTCT-1_1	Cancer_HGSOC1	7278	2060	8.7524	NA	NA	2	2	0.234306	Singlet	Tumor	T_cells	CD4T	-0.442828	-0.496388	0.49635	-0.220018	-0.209002	-0.110675	0.129338	-0.393442	-0.853952	-0.670772	-0.698749	-0.504418	-0.412245	-0.109706	-0.55046	-0.0759253	-0.823615	-0.144182	-0.0627012	-0.278781	-0.0703827	-0.161233	-0.64647	-0.295843	-0.747735	-0.113943	-0.810659	-0.440774	0.46113	-0.295668	-0.464868	-0.561096	-0.132954	-0.328935	-0.34621	1.25126
AGAAGCGAGACCTTTG-1_1	Cancer_HGSOC1	20521	4852	9.95566	NA	NA	1	1	0.239611	Singlet	Tumor	Monocyte	myeloid	0.920823	1.05577	1.58136	0.967159	-0.566958	0.638407	-0.377552	1.85569	-1.08234	0.342643	1.29393	2.4713	1.1266	0.397073	-0.15462	0.138064	0.565602	0.826007	0.775409	0.37894	1.05348	1.7023	0.872999	1.43742	2.5341	3.21091	1.99243	2.31589	-1.26026	1.53809	0.880196	1.12788	0.920062	0.741749	0.747969	0.723478
AGAAGCGCAACGTTAC-1_1	Cancer_HGSOC1	6532	2168	12.4005	NA	NA	0	0	0.330681	Singlet	Tumor	Epithelial_cells	epithelial	-0.771832	0.141497	-1.0688	0.0361118	0.724594	-0.345488	-0.101515	0.50815	-0.0779266	-0.198673	0.439087	0.16408	-0.469887	-0.502486	-0.432497	0.590834	0.736215	-0.297623	-0.646719	-0.602311	0.454008	-0.258177	-0.209082	-0.376258	-0.15841	-0.246323	-0.636298	-0.705635	0.13977	-1.25311	-0.370334	-0.403574	-0.67373	-0.286957	0.661084	-0.543186
AGAAGCGCACTTGTGA-1_1	Cancer_HGSOC1	4101	1662	10.8022	NA	NA	3	3	0.177719	Singlet	Tumor	NK_cell	NK	-0.47538	-0.956939	0.0923154	-0.210278	-0.886004	-0.632382	0.30598	-0.277006	0.276168	-0.717417	-0.570607	-0.311497	-0.673887	-0.373468	-0.648758	-0.754922	-0.141758	-0.595088	0.147947	-0.503454	-1.21221	-0.416543	-0.465356	0.444177	0.199218	0.353059	-0.387291	-0.206867	0.542573	-0.193282	-0.509429	-0.715032	-0.12989	-0.959981	-0.634555	-0.0965869
AGAAGCGGTACAGGTG-1_1	Cancer_HGSOC1	18071	4019	7.29899	NA	NA	1	1	0.253758	Singlet	Tumor	Monocyte	myeloid	-0.434616	0.861594	1.32134	0.534355	-0.428165	0.126542	1.29161	1.43694	-0.331573	0.577703	1.33798	2.04805	1.16801	0.793449	-0.156128	0.199028	0.637432	0.38583	1.19353	0.244296	0.038731	0.915259	0.745873	0.972421	2.00583	2.83547	3.03052	2.77085	-1.19272	1.85514	0.976047	0.579087	0.844086	-0.025016	-0.0236444	0.715649
AGAAGCGGTCAGCGTC-1_1	Cancer_HGSOC1	3946	1248	18.9052	NA	NA	1	1	0.307692	Singlet	Tumor	Monocyte	myeloid	0.325744	-0.664098	-0.68693	-0.903317	0.0829905	-0.684193	0.449886	-0.109391	0.0744972	-0.0594736	0.232337	0.127847	-0.812594	-0.61205	-0.111401	-0.495559	-0.755232	-1.26478	-0.587828	-0.864476	0.332512	-0.348347	-0.0340962	-0.29023	0.446038	0.850019	-0.654758	-0.238889	0.703177	0.454575	-0.409746	-1.05137	-1.37707	-0.884568	0.0757328	-0.880965
AGAAGCGGTTCATCGA-1_1	Cancer_HGSOC1	3137	1498	4.81352	NA	NA	3	3	0.233422	Singlet	Tumor	NK_cell	NK	-1.01466	-0.630356	0.213458	-0.242361	-0.936386	-0.524102	0.257625	-0.359479	0.072261	-0.812287	-0.581298	-0.594163	-0.518418	-0.737372	-0.196387	-0.248821	-0.220958	-0.448349	-0.593434	-0.892467	-0.38514	-0.415768	-0.139418	0.327278	0.625944	0.348645	-0.417479	-0.105174	0.970881	0.147901	-0.579682	-1.09941	-0.656146	-0.570728	-0.419241	-0.989376
AGAAGCGTCAACTGAC-1_1	Cancer_HGSOC1	3755	1687	7.61651	NA	NA	3	3	0.228117	Singlet	Tumor	NK_cell	NK	0.48551	-0.436034	0.2902	-0.688835	-0.722009	-0.515052	-0.0880678	0.0405025	-1.38537	-0.383274	-0.639454	0.0830733	-0.283599	-0.371091	-0.298036	-0.523449	-0.360217	-0.497961	-0.445653	-0.435734	0.0626695	-0.470059	-0.495178	0.00350763	-0.965413	-0.284501	-0.138485	0.0555923	0.397394	0.0590316	0.102927	-0.411712	-0.269014	-1.12207	-0.521406	-0.677522
AGAAGCGTCTACCACC-1_1	Cancer_HGSOC1	3883	1318	17.332	NA	NA	12	12	0.222812	Singlet	Tumor	B_cell	B	-1.05173	-0.892383	-0.445806	-0.337624	-0.943573	-0.14284	-0.663157	-1.10125	0.594607	-0.853813	-0.614318	-1.11337	-0.919691	-0.639962	-0.460179	-0.588145	-0.796181	-1.33667	-0.666513	-0.969368	-1.04315	-0.37032	-0.57017	-0.396867	-0.0962021	-0.919326	-1.13397	-1.09198	1.03686	-0.689062	-1.01305	-0.972778	-0.742733	-0.375537	-0.73489	-0.835519
AGAAGTAAGCATTTCG-1_1	Cancer_HGSOC1	1399	694	5.21801	NA	NA	2	2	0.232538	Singlet	Tumor	NK_cell	CD4T	0.288272	-0.461531	-0.266388	-1.0279	-0.653175	-1.28541	-0.940423	-0.977592	-0.0684381	-1.02631	-0.55896	-0.969794	-0.50546	-0.947966	-0.474134	-0.725001	-0.71063	-0.893328	-0.807646	-0.726694	-1.0532	-0.300472	-1.0663	-1.53385	-1.06313	-0.913399	-1.50458	-1.42399	0.703363	-0.669551	-1.18177	-1.08675	-0.833519	-0.294757	-0.603502	-0.230367
AGAAGTAAGCGCCCAT-1_1	Cancer_HGSOC1	3541	1693	10.6467	NA	NA	3	3	0.220159	Singlet	Tumor	NK_cell	NK	0.255988	-0.720095	0.276137	-0.357887	0.120863	0.0785892	-0.011186	-0.689205	-0.842914	-0.792006	-1.02846	-0.125584	-0.667791	-0.150116	-0.401914	-0.236563	-0.532746	-0.573815	-0.13963	-0.704591	0.103725	-0.470879	-0.982143	-0.290359	-1.04441	-0.444438	0.00387184	0.150113	0.403382	-0.515796	0.0619959	-0.745843	-0.232805	-0.687872	-0.32656	-0.355821
AGAAGTAAGTGCAGCA-1_1	Cancer_HGSOC1	3291	1503	13.3698	NA	NA	3	3	0.180371	Singlet	Tumor	NK_cell	NK	0.312651	-0.487316	0.294858	-0.757814	-0.427219	-0.246259	0.149309	-0.202951	1.38669	-0.439908	-0.513925	-0.482314	-0.694982	-0.634269	-0.697784	-0.626222	-0.467176	-0.608619	-0.874693	-0.701046	0.520716	-0.268737	-0.129946	0.80577	-0.31787	-0.649237	-0.979719	-0.348128	0.344318	0.154871	-0.377441	-0.643625	-0.740477	-0.726988	-0.414826	-0.888779
AGAAGTACACGAAAGC-1_1	Cancer_HGSOC1	4840	2022	5.2686	NA	NA	3	3	0.153846	Singlet	Tumor	NK_cell	NK	-0.748813	-0.302261	0.0901243	0.22347	-0.47586	0.0261233	-0.573717	-0.455826	1.95642	-0.155082	-1.22419	0.210987	-0.693753	-0.234354	-0.315634	-0.241771	-0.422551	-0.334462	-0.174112	-0.412152	0.39973	-0.442368	0.117511	0.247431	0.202515	-0.487799	-0.469857	-0.701344	0.331791	-0.373104	0.0139616	-0.334235	-0.152206	0.0840475	0.23718	0.224577
AGAAGTAGTGTTTGCA-1_1	Cancer_HGSOC1	4570	1585	15.3611	NA	NA	1	1	0.306808	Singlet	Tumor	Monocyte	myeloid	0.422357	-0.562951	0.0386355	-0.479266	-0.774482	-0.311167	-0.531508	0.156322	-0.755372	-0.350195	0.105382	-0.253182	-0.847286	-0.596092	-0.317979	-0.0438656	-0.190442	-0.246957	-0.442719	-0.545795	-0.949965	-0.438894	-0.132939	-1.01178	0.162997	1.04622	-0.351443	-0.0813287	1.12492	1.1558	-0.197968	-0.569801	-0.960796	-0.420661	-0.106159	-0.678316
AGAAGTATCCATTTCA-1_1	Cancer_HGSOC1	11482	3811	16.1296	NA	NA	0	0	0.32626	Singlet	Tumor	Epithelial_cells	epithelial	-0.475453	1.18977	-0.868103	1.43411	0.574458	1.32649	0.733033	1.20851	-0.407213	1.09859	0.911971	0.772935	0.336068	0.514819	0.805992	1.57918	1.19083	0.508953	0.365836	0.907944	1.08537	1.45106	1.88684	-0.00696251	-0.0610484	0.244653	0.00537231	-0.0106576	0.0264152	0.7051	0.740816	0.336837	0.673164	0.0280941	2.05606	0.609981
AGACAAACATGGAATA-1_1	Cancer_HGSOC1	21875	5361	6.42286	NA	NA	0	0	0.30504	Singlet	Tumor	Epithelial_cells	epithelial	0.794667	1.61888	-1.10622	1.5205	1.34076	1.99243	0.664533	1.47655	0.914039	1.65249	1.49428	0.511093	0.840426	0.77127	0.341819	3.10142	2.54504	1.13092	0.488518	1.355	1.30197	1.7154	1.57746	0.246382	-0.0707616	-0.997494	0.909408	0.723283	0.860346	-0.23737	1.14424	1.32938	0.963324	1.29976	2.12428	1.25795
AGACACTAGGTCCCGT-1_1	Cancer_HGSOC1	4145	1671	8.56454	NA	NA	3	3	0.21397	Singlet	Tumor	NK_cell	NK	0.666689	-0.858716	0.604315	-0.633006	-0.715318	-0.685561	-0.475753	-0.400949	-0.55117	-0.56678	-0.600023	-0.251665	-0.624064	-0.378411	-0.27582	-0.469336	-0.729771	-0.522659	-0.309631	-0.972902	0.297924	0.123319	-0.357493	0.200957	0.77008	-0.0614792	-0.803797	-0.544798	0.189787	-0.308381	-0.195103	-0.618081	-0.38539	-0.499533	-0.457313	-1.30197
AGACACTAGTTGAATG-1_1	Cancer_HGSOC1	5251	2024	3.86593	NA	NA	3	3	0.158267	Singlet	Tumor	NK_cell	NK	0.00491741	-0.314781	0.868545	-0.364353	-0.820876	-0.202366	-0.554907	0.181467	-0.0045904	-0.465907	-0.874856	0.332576	-0.748213	-0.128699	-0.316873	-0.714264	-0.197252	-0.0994182	-0.227238	-0.334219	0.321789	-0.128138	0.0590475	0.470704	-0.225358	-0.429723	-0.60902	0.028291	-0.212638	1.21711	0.0739543	-0.425371	-0.53866	-0.678697	-0.524918	-0.749155
AGACACTGTAGTGGCA-1_1	Cancer_HGSOC1	4340	1746	11.8203	NA	NA	3	3	0.190097	Singlet	Tumor	NK_cell	NK	-0.466881	-0.805673	0.555697	-0.369829	-0.512728	-0.442481	0.354551	-0.766375	-0.831991	-0.550707	-0.640427	-0.440225	-0.673014	-0.414764	-0.27459	-0.353323	-0.438762	-0.905674	-0.257611	-0.826235	1.63225	-0.465556	-0.275738	0.267945	0.0936301	0.208866	-0.658648	-0.406997	0.153277	0.317381	-0.129255	-0.516017	-0.701144	-0.108313	-0.19659	1.07549
AGACACTTCAGAGCAG-1_1	Cancer_HGSOC1	2971	1240	16.6611	NA	NA	2	2	0.205128	Singlet	Tumor	T_cells	CD4T	-0.074485	-0.954766	-0.168574	-0.755567	-0.318754	-0.703112	-0.129824	-0.622719	-1.3218	-0.792526	-0.368183	-0.667027	-1.21812	-0.690942	-0.532562	-0.73987	-0.806092	-0.501524	-0.563242	-0.646421	0.0391316	-0.61025	-0.383833	-0.551358	-0.179031	-0.820247	-1.10104	-0.992577	1.0837	-0.772507	-0.707499	-0.812629	-0.903724	-1.031	-0.520869	-1.17559
AGACACTTCCAAACCA-1_1	Cancer_HGSOC1	7392	2446	18.5335	NA	NA	1	1	0.342175	Singlet	Tumor	Macrophage	myeloid	1.29073	-0.046239	0.883067	1.18536	0.361465	0.391609	2.38962	1.13889	-0.608535	1.37702	0.900171	1.91952	-0.407655	-0.149509	0.167072	0.126072	-0.0495619	-0.556263	0.253078	0.180546	1.2852	0.616773	0.624515	0.39013	2.02391	3.06481	-0.34613	0.461446	-0.0191051	2.07792	0.272165	0.686517	-0.505074	-0.581351	0.13679	0.728496
AGACAGGCACTGCATA-1_1	Cancer_HGSOC1	3181	1391	1.57183	NA	NA	5	5	0.213086	Singlet	Tumor	T_cells	CD8T	-1.08732	-1.00837	-0.0856883	-0.899593	-1.08875	-0.621026	-0.708038	-1.10457	-0.249862	-0.81273	-0.457929	-1.00251	-0.596383	-0.09427	-0.682671	-0.521129	-0.824854	-0.804693	-0.370469	-0.72796	-0.353857	-0.321214	-0.400528	-1.09058	-0.134517	-1.29608	-1.15751	-0.999776	0.560672	0.16361	-0.730177	-0.727143	-0.467211	-0.548076	-0.492161	-0.844311
AGACAGGGTCCGATCG-1_1	Cancer_HGSOC1	13558	3648	22.5402	NA	NA	9	9	0.320955	Singlet	Tumor	NK_cell	CD8T	1.05152	-0.183167	1.97456	0.477238	0.179991	0.270541	0.793854	1.90542	0.29159	0.971379	1.04148	2.51043	0.0473041	-0.0988919	0.21988	0.21415	0.474894	-0.202194	0.595652	-0.265251	1.09945	1.2249	0.778262	1.69892	2.20348	2.129	2.58815	2.77806	-0.174826	1.37338	1.02212	0.569972	0.185733	-0.920697	0.497395	0.346749
AGACAGGGTGGAACCA-1_1	Cancer_HGSOC1	2956	1305	18.3694	NA	NA	3	3	0.229001	Singlet	Tumor	NK_cell	NK	-1.05239	-0.915498	0.0772942	-0.623701	-0.531534	-0.453813	0.0526552	-0.893822	-0.474581	-0.847447	-0.639747	-0.578103	-0.691374	-0.538424	-0.725052	-0.558731	-0.566933	-0.941297	-0.540433	-1.12326	-0.77502	-0.481579	-0.795038	-0.168413	-0.498562	-0.804124	-0.993678	-0.83455	0.262717	0.0338459	-0.141091	-1.07258	-0.917517	-0.233594	-0.63184	-1.08691
AGACAGGGTGTCTCCT-1_1	Cancer_HGSOC1	5400	2175	23.8704	NA	NA	4	4	0.206897	Singlet	Tumor	NK_cell	T	0.0603012	-0.611111	0.869077	-0.653086	-0.757292	-0.459857	0.801795	0.326328	-0.588786	-0.570755	-0.719293	-0.293107	-0.662195	0.0725748	-0.39879	-0.422264	-0.541744	-0.417875	0.491275	-0.688433	0.239177	-0.956823	-0.323201	0.523545	-0.425195	0.00683039	-0.682566	-0.285805	-0.310805	0.0355492	1.36376	-0.286129	-0.603148	-0.384128	-0.174546	0.469684
AGACAGGGTTCGAGCC-1_1	Cancer_HGSOC1	8001	2371	15.5731	NA	NA	1	1	0.274978	Singlet	Tumor	Monocyte	myeloid	2.85533	-0.266271	0.885845	-0.277445	0.540797	-0.595399	0.462677	0.446939	-0.607835	0.0705408	0.849153	1.15017	-0.21888	-0.407939	-0.0450461	-0.179402	-0.0219627	-0.168192	0.380816	-0.292025	0.675504	0.308434	0.561708	1.71792	2.1694	2.77965	0.904378	1.02208	0.685539	2.30418	0.311015	-0.27483	-0.514174	-0.285718	-0.0143392	1.57666
AGACAGGTCGAACGGA-1_1	Cancer_HGSOC1	9986	2925	7.5005	NA	NA	1	1	0.260831	Singlet	Tumor	Macrophage	myeloid	-0.350106	0.609473	1.18543	0.440459	0.483181	0.22706	0.20705	1.03352	-1.37297	0.392737	1.0991	1.86714	0.0235098	-0.128684	0.309637	0.229634	0.39095	-0.166656	-0.172524	0.490705	1.32089	0.21173	0.826772	0.908042	1.94374	1.58023	0.0580482	0.465333	0.192656	2.668	0.647384	0.327569	0.512178	0.598648	0.348252	2.44629
AGACAGGTCGACATTG-1_1	Cancer_HGSOC1	4162	1803	8.26526	NA	NA	5	5	0.204244	Singlet	Tumor	NK_cell	CD8T	-0.827302	-0.566685	1.03503	-0.55048	0.392776	0.00267112	1.45932	0.135254	1.27374	-0.472395	-0.910353	0.0308498	-0.712316	-0.836622	-0.449546	-0.461841	-0.42889	-0.386329	-0.421265	-0.622073	0.0179156	-0.0648905	-0.201185	0.309022	0.387471	-0.210613	-1.07212	-0.368132	0.491633	0.457824	0.114523	-0.138988	-0.684673	-0.725108	0.156873	-0.716497
AGACCATAGTCTTCCC-1_1	Cancer_HGSOC1	3848	1515	13.8514	NA	NA	5	5	0.251989	Singlet	Tumor	NK_cell	CD8T	0.435465	-0.772039	0.116993	-0.306026	-0.380265	-0.376067	-0.848419	-0.329059	0.0542145	-1.12914	-0.693656	-0.0377145	-0.51909	-0.528248	-0.23996	-0.403219	-0.793167	-0.505823	-0.282669	-0.504351	0.544466	0.349058	-0.668666	-0.0860756	-0.664656	-0.166242	-0.930603	-0.839401	0.0979852	-0.15064	0.120699	-0.94585	-0.760693	-0.727152	-0.148045	0.131212
AGACCATCAGTTCCAA-1_1	Cancer_HGSOC1	3371	1441	19.5194	NA	NA	4	4	0.209549	Singlet	Tumor	Epithelial_cells	T	-0.543873	-1.20606	-1.31364	-0.203155	0.350313	-0.567705	-1.70329	-0.759521	-0.626762	-0.0864793	-0.67259	-1.6344	-1.27	-0.671644	-0.612019	0.0291026	0.155567	-1.22204	-0.776065	-0.560859	-1.11984	0.0226321	-1.43777	-1.7859	-1.40945	-0.572081	-1.06499	-1.03651	0.825707	-1.40014	-0.456208	-0.846414	-1.22086	-0.504859	0.156801	-0.276577
AGACCATCATCCGGCA-1_1	Cancer_HGSOC1	4113	1530	20.107	NA	NA	1	1	0.335102	Singlet	Tumor	Macrophage	myeloid	0.655897	-0.809102	-0.0545039	-0.479362	-1.16063	-0.713705	-0.231894	-0.623832	-1.61493	-0.949195	0.0883567	-0.169704	-0.953962	-0.390286	-0.534658	-0.235783	-0.149891	-0.877067	-0.562907	-0.780222	-0.0364312	-0.51056	-0.372807	-0.768504	0.114464	0.329879	-1.18765	-0.92775	0.378812	0.541988	-0.331879	-1.0535	-0.941738	-0.620664	-0.338194	-0.566306
AGACCATTCAGATGCT-1_1	Cancer_HGSOC1	17765	4326	24.3569	NA	NA	0	0	0.327144	Singlet	Tumor	Epithelial_cells	epithelial	-1.57476	1.14743	-0.425959	1.27767	0.334479	0.972573	2.04878	0.993311	0.652475	0.731028	0.787406	0.227806	0.253594	0.249543	0.125217	1.85705	1.59272	0.579118	0.478781	0.538656	-0.102882	0.928497	0.674151	0.693721	0.472824	0.365685	-0.519127	0.178233	0.265505	-0.372452	1.12921	0.569935	0.361371	0.772341	0.640628	0.79989
AGACCATTCTATACGG-1_1	Cancer_HGSOC1	17958	3988	5.51286	NA	NA	1	1	0.328912	Singlet	Tumor	Macrophage	myeloid	0.0189587	1.0961	1.1254	1.54313	1.49926	1.20032	0.308709	1.94116	-0.0110898	1.4003	1.46209	3.05724	0.812102	0.777875	0.85963	0.935794	0.770754	1.07998	0.747955	1.05003	1.38651	1.6842	2.55254	2.46618	2.80417	3.57995	0.329706	0.72835	-1.27439	1.99062	1.05237	1.92567	1.15339	0.226505	1.02655	1.71566
AGACCCGAGACAAGCC-1_1	Cancer_HGSOC1	6706	2215	12.377	NA	NA	1	1	0.258179	Singlet	Tumor	Macrophage	myeloid	-0.516453	-0.157218	0.6226	-0.000556707	0.385434	-0.430307	-0.43524	0.544491	0.855247	0.551151	1.27174	1.46503	-0.509508	-0.52415	-0.11373	0.296157	0.107937	-0.186793	-0.517515	-0.676511	1.29936	0.084046	0.40225	0.116225	0.710883	1.92089	-0.388522	-0.0861774	-0.130117	1.61033	0.264749	0.110134	-0.934448	-0.177744	0.0541896	0.780608
AGACCCGAGCATCCCG-1_1	Cancer_HGSOC1	1779	786	19.2805	NA	NA	4	4	0.200707	Singlet	Tumor	T_cells	T	-0.488832	-1.19349	-1.2275	-0.876464	-0.798579	-1.10247	-1.33175	-0.784182	0.0325983	-0.422762	-0.825068	-1.22268	-1.19483	-0.648512	-0.51203	-0.41137	-0.791847	-0.975672	-0.537601	-1.11693	-0.108579	-0.74446	-0.920405	-0.731853	-0.696891	-0.758614	-1.21223	-1.23224	0.710347	-0.138517	-1.3332	-1.18968	-1.28966	-0.694598	-0.69704	-0.359712
AGACCCGAGCCTCAGC-1_1	Cancer_HGSOC1	8857	2548	12.3067	NA	NA	1	1	0.280283	Singlet	Tumor	Monocyte	myeloid	-0.687738	-0.317177	0.758352	0.0506238	0.158029	-0.285469	0.971233	0.975878	-1.45562	-0.393928	0.393178	1.03256	-0.115138	-0.317626	-0.206951	0.368819	0.409411	-0.586927	0.298381	-0.873465	-0.205041	0.588292	0.549284	0.167535	1.17169	1.42095	0.239943	0.458356	-0.349924	1.27303	0.413104	0.0444191	-0.230247	0.116793	-0.483716	0.0328481
AGACCCGAGGATATAC-1_1	Cancer_HGSOC1	26639	4035	18.3303	NA	NA	1	1	0.320955	Singlet	Tumor	Macrophage	myeloid	0.602831	1.49906	0.784208	1.41868	0.601789	0.565948	-1.19219	1.22507	-0.36156	0.123867	0.608986	1.21219	0.750349	0.149013	0.179094	0.180048	0.186362	1.06108	0.304364	0.54177	0.29201	1.24158	0.498124	1.07578	1.14606	1.19147	-0.475591	0.170924	-1.93767	0.7728	1.07139	0.541256	1.36342	1.86379	0.653621	0.62285
AGACCCGCAAGAGATT-1_1	Cancer_HGSOC1	3379	1432	14.0278	NA	NA	3	3	0.177719	Singlet	Tumor	NK_cell	NK	-0.436464	-0.695043	0.209685	-0.439033	-0.0102456	-0.288936	-0.0795509	-0.655361	0.041735	-0.0260502	-0.647786	-0.558554	-1.11661	-0.57107	-0.457122	-0.507443	-0.593389	-0.792089	-0.512584	-0.966343	-0.101282	-1.11528	-0.463374	-0.117174	-0.682401	0.247972	-0.928862	-0.540909	0.492205	0.613227	-0.164045	-0.211375	-0.950005	-0.195088	0.0731409	0.275991
AGACCCGCAGGATGAC-1_1	Cancer_HGSOC1	3720	1358	21.371	NA	NA	1	1	0.320071	Singlet	Tumor	Monocyte	myeloid	-1.1033	-0.59036	-0.367656	-0.0840656	-0.656921	-0.688649	-0.989934	0.232608	-0.533378	-0.144294	0.406524	0.424678	-0.93901	-0.677733	-0.155377	0.136944	-0.13729	-1.15221	-0.697797	-1.0164	-0.436059	-0.456519	0.325083	0.441425	0.0146405	1.25971	0.232905	0.323984	0.58385	0.772436	-0.261377	-0.753102	-0.896325	0.115369	0.0334282	-0.107727
AGACCCGGTAGTGTGG-1_1	Cancer_HGSOC1	42558	5760	22.5927	NA	NA	1	1	0.341291	Singlet	Tumor	Macrophage	myeloid	0.350365	1.74494	0.77569	1.84785	0.58191	1.70526	1.12462	1.51005	-0.0301261	1.55368	1.6012	2.05126	1.26084	0.468476	0.412694	1.87209	1.55285	1.68428	0.15582	0.950171	0.99446	1.83344	2.0577	1.77672	1.3985	1.31413	0.219333	0.880038	-1.38503	2.19616	1.84071	1.19062	0.852408	1.03851	1.07843	0.994237
AGACCCGGTGACTGTT-1_1	Cancer_HGSOC1	3849	1665	7.19667	NA	NA	5	5	0.205128	Singlet	Tumor	NK_cell	CD8T	-0.634996	-0.415336	-0.0764541	-0.302395	-0.383379	-0.459594	-0.126844	0.466393	0.415238	-0.42246	-0.740696	-0.405806	-0.00799751	-0.319911	-0.204856	-0.0214883	-0.0913618	-0.679979	0.161876	-0.525528	-1.24405	-0.521275	-0.373777	0.447758	-0.887275	0.50664	-0.356136	-0.367356	0.247792	-0.308039	-0.903479	-0.184853	-0.242037	-0.61271	-0.425552	-0.485687
AGACCCGTCAACCTTT-1_1	Cancer_HGSOC1	8235	2987	7.38312	NA	NA	5	5	0.238727	Singlet	Tumor	T_cells	CD8T	0.862461	0.00141363	1.62575	-0.135684	-1.00172	-0.161341	-0.272809	0.74497	0.0131688	0.293056	-1.22981	0.246297	0.238957	0.495887	-0.476755	0.145132	0.214424	0.510541	-0.0952654	-0.329082	-1.48167	-0.0904401	0.610111	1.54404	0.710771	0.337452	-0.0450758	0.223951	-1.178	0.223545	0.279862	0.545209	0.561772	0.360072	-0.673231	-0.0507806
AGACCCGTCGCAGAGA-1_1	Cancer_HGSOC1	8828	3562	9.18668	NA	NA	7	7	0.250221	Singlet	Tumor	NK_cell	CD8T	-1.50945	-0.0207529	0.614525	0.0677208	-1.08236	-0.305965	1.70782	1.41457	0.423904	0.0866523	-0.993273	0.453112	1.3541	3.15497	-0.702083	-0.191028	-0.239856	-0.102538	2.74715	-0.51076	-0.537726	0.236649	0.0195417	0.168016	-0.822918	-0.00427324	-0.212016	-0.0504957	-1.02836	0.2576	2.00149	-0.0152405	0.825775	-0.281463	-0.433271	-1.01527
AGACCCGTCTATGTGG-1_1	Cancer_HGSOC1	6157	2154	10.8494	NA	NA	3	3	0.266136	Singlet	Tumor	NK_cell	NK	-1.88589	-0.18714	1.26478	-0.508443	-0.0896554	-0.373413	1.65482	0.535117	-0.0626336	-0.703834	-0.179023	0.0504882	-0.449897	-0.232439	-0.401835	0.24695	-0.118688	-0.257363	-0.0589739	-0.207233	-0.82198	0.0413887	0.273486	0.822693	0.256723	0.220895	-0.393643	-0.589323	-0.619304	0.19701	-0.178235	-0.112629	0.0125393	0.459793	-0.411962	-0.400171
AGACTCAAGGTTTACC-1_1	Cancer_HGSOC1	4787	1898	24.9008	NA	NA	1	1	0.319187	Singlet	Tumor	Macrophage	myeloid	-0.719004	-0.482409	0.551375	-0.524875	0.212332	0.0594393	-0.487666	-0.753686	-0.785368	-0.535217	0.644878	-0.307115	-0.686307	-0.751582	-0.414656	-0.613742	-0.596755	-1.09666	-0.802755	-0.778322	-0.199786	-0.446937	-0.611025	-0.12466	0.550314	0.318762	-0.605958	-0.790527	0.360404	0.985352	0.0804178	-0.469669	-0.859055	-1.15632	0.408512	-0.0962923
AGACTCAAGTCTTGGT-1_1	Cancer_HGSOC1	9514	2928	23.6178	NA	NA	1	1	0.338638	Singlet	Tumor	Macrophage	myeloid	-0.733298	0.259997	0.439246	0.14548	1.39549	0.467224	0.306758	0.313074	-0.289075	0.372393	1.73503	1.53586	-0.294919	-0.201552	0.195115	0.741489	0.584356	0.0400209	0.0789315	0.113903	1.37582	0.573445	0.126819	0.884633	0.0668798	0.874539	-0.0247182	0.022321	0.107803	2.10341	0.542556	0.00351783	-0.265437	-0.697046	0.983372	-0.526006
AGACTCACAGAAATCA-1_1	Cancer_HGSOC1	28263	4469	4.89332	NA	NA	8	8	0.259947	Singlet	Tumor	NK_cell	B	1.45343	0.596525	1.97321	1.01913	-1.6822	0.318877	-0.152972	1.07048	-0.721618	0.584012	-0.43475	1.04689	0.942777	0.330539	-0.674844	-0.206691	-0.0132683	0.0160366	0.443566	0.204261	-0.18218	1.08509	0.897687	2.09889	1.24804	1.05822	0.470148	0.904451	-1.29582	0.393157	1.01266	1.28518	1.02989	0.644426	0.314235	0.178638
AGACTCACAGCATGCC-1_1	Cancer_HGSOC1	5195	1987	8.89317	NA	NA	2	2	0.214854	Singlet	Tumor	T_cells	CD4T	-0.51096	-0.176572	0.459714	-0.179938	-0.790293	0.423767	1.00539	0.359321	0.14725	0.10763	-0.733215	0.151669	-0.551975	-0.0509276	-0.318634	-0.116644	-0.33987	-0.416934	-0.220061	-0.769843	1.03473	-0.268335	-0.221806	0.259798	-0.519591	0.111476	-0.392773	-0.139222	0.045524	-0.89352	-0.26169	-0.434478	-0.129901	-0.405551	-0.153438	-0.226626
AGACTCAGTGGTCTGC-1_1	Cancer_HGSOC1	17083	3896	2.81566	NA	NA	1	1	0.332449	Singlet	Tumor	Macrophage	myeloid	0.241272	1.4357	1.48318	1.59407	2.19724	0.851912	0.0668485	1.64346	-1.27302	0.534782	1.07687	1.77251	1.09252	1.17721	0.0643432	0.382178	0.78454	1.11361	0.979609	1.25574	0.900478	0.746376	1.51071	1.33435	0.574221	1.8733	-0.117535	0.471544	-1.48945	2.75944	0.679569	1.60535	1.57795	0.763299	0.530025	-0.287471
AGACTCATCACGATCA-1_1	Cancer_HGSOC1	2816	1231	16.4773	NA	NA	1	1	0.343059	Singlet	Tumor	Macrophage	myeloid	-0.719012	-0.812789	-0.023785	-1.04225	0.320011	-0.328751	0.174342	-1.09101	-1.01624	-0.42957	1.02209	0.369287	-1.0055	-0.812552	-0.384402	-0.690796	-0.992287	-0.944103	-0.616902	-1.26643	-1.30656	-0.426736	-0.809844	-0.384186	0.154949	0.667902	-0.548593	-0.315409	0.950368	-0.330562	-0.444017	-1.01295	-0.963895	-0.661372	0.286596	1.06992
AGAGAATAGGCCCACT-1_1	Cancer_HGSOC1	4162	1717	9.80298	NA	NA	3	3	0.210433	Singlet	Tumor	NK_cell	NK	-0.72903	-0.335254	0.920924	-0.556465	-0.928455	-0.882825	0.446255	-0.628636	-0.324218	-0.472045	-0.596516	-1.03732	-0.0464123	-0.434216	-0.726432	-0.691462	-0.489084	-0.408018	3.72796003956756e-05	-0.6496	-0.837154	-0.712715	-0.907862	-0.327672	0.16168	0.0375286	1.27067	0.971459	1.3304	0.0353607	-0.298254	-0.90513	-0.432877	-0.531086	-1.02352	-0.185516
AGAGAATCAAAGGTTA-1_1	Cancer_HGSOC1	5756	2254	4.58652	NA	NA	3	3	0.23519	Singlet	Tumor	NK_cell	NK	0.336749	-0.24761	0.80889	-0.28773	-0.373798	0.0266382	0.466866	0.297145	0.451187	-0.0961417	-0.0975707	0.144941	0.25392	-0.0223089	-0.65765	-0.44093	-0.393932	0.467857	0.00372348	-0.55315	-0.276157	-0.927121	-0.354205	0.38667	-1.11229	0.131576	0.154145	-0.0165991	0.410988	0.38128	0.0372439	0.185524	0.226518	-0.0273634	-0.636063	-0.75395
AGAGAATCACCCAATA-1_1	Cancer_HGSOC1	8056	2835	6.77756	NA	NA	11	11	0.234306	Singlet	Tumor	Endothelial_cells	endothelial	1.52162	0.41791	-1.03173	0.376965	1.25842	0.893782	-0.221839	0.820713	-0.934006	-0.0222943	0.944932	-0.159711	0.246455	-0.239707	0.402518	-0.490248	-0.143652	0.549327	-0.0870816	-0.177689	1.87836	0.15486	0.561079	0.190967	-0.146916	-0.445705	-0.635346	-0.68507	-0.192343	0.0349841	0.337403	-0.29773	0.124361	0.0570977	0.977329	1.92031
AGAGAATCAGACTGCC-1_1	Cancer_HGSOC1	3360	1597	4.82143	NA	NA	3	3	0.210433	Singlet	Tumor	NK_cell	NK	0.0117467	-0.931228	0.38015	-0.49538	-1.06058	-0.284908	-0.408698	0.0482577	-0.0126821	-0.369831	-0.543201	-0.663731	-0.618087	-0.591006	-0.38103	-0.109869	-0.412556	-0.438768	-0.322391	-0.982193	-0.602867	-1.01414	-0.541978	-0.227014	0.397257	0.118497	-0.241671	-0.145588	0.27424	0.00388988	-0.0692566	-0.22982	-0.147376	-0.273245	-0.424868	-0.0584635
AGAGAATGTGCCCACA-1_1	Cancer_HGSOC1	11906	3507	19.8471	NA	NA	0	0	0.333333	Singlet	Tumor	Epithelial_cells	epithelial	0.514385	0.40591	-1.1618	0.998482	1.15058	1.22167	0.448582	0.667993	0.441279	0.67837	1.1435	0.206587	0.154226	0.380225	0.409343	1.58256	0.980327	0.512135	0.271728	0.907962	3.13081	0.445963	1.00594	0.0271677	-0.799926	-0.716285	-0.169597	-0.261695	0.290365	-0.386499	0.960235	0.268041	0.556516	0.374032	1.37529	2.29533
AGAGAATTCGCAATTG-1_1	Cancer_HGSOC1	7036	2425	17.5526	NA	NA	1	1	0.26702	Singlet	Tumor	Monocyte	myeloid	0.059058	-0.278529	0.731969	-0.449742	0.016161	0.317668	0.377903	0.565521	-0.935328	-0.0744415	1.17232	1.33317	-0.416608	-0.378665	-0.0766641	0.427308	-0.22895	-0.432757	-0.027052	-0.293479	2.37454	-0.0869473	0.709631	0.857989	1.32217	1.52992	0.618404	0.657718	-0.466776	2.01396	0.483906	-0.309482	-0.2603	0.579722	-0.250309	1.54178
AGAGAGCGTGAGTTTC-1_1	Cancer_HGSOC1	4399	1400	13.7531	NA	NA	2	2	0.222812	Singlet	Tumor	T_cells	CD4T	-1.13812	-0.628128	0.502338	-0.761458	0.547094	-0.480359	-0.337244	-0.45059	-1.34816	-0.736825	-0.884212	-0.927801	-0.666928	-0.498891	-0.36517	-0.463719	-0.351742	-0.766854	-1.10768	-1.01407	-0.719713	-0.263464	-0.0527985	-0.416396	-0.0918923	-0.337816	-0.927216	-1.04609	0.486788	-0.144424	-0.575237	-0.427422	-0.119536	0.176754	-0.398997	0.382183
AGAGAGCTCATCAGTG-1_1	Cancer_HGSOC1	1522	790	21.8791	NA	NA	4	4	0.204244	Singlet	Tumor	NK_cell	T	-0.532788	-1.13686	-0.667835	-0.688668	-0.294211	-1.05902	0.374975	-1.17388	-0.473826	-0.951188	-0.422071	-1.01471	-1.10284	-0.708201	-0.428197	-0.627497	-0.721188	-0.665165	-0.696366	-1.03828	-0.845615	-0.860745	-0.808199	-0.446434	-0.203864	-0.184995	-0.872544	-0.989916	0.743812	-0.281471	-0.486932	-1.44087	-1.31736	-0.43594	-0.709719	-0.991633
AGAGAGCTCCCTCTAG-1_1	Cancer_HGSOC1	28789	5416	11.5982	NA	NA	0	0	0.312997	Singlet	Tumor	Epithelial_cells	epithelial	1.66784	1.53423	0.0800028	1.12747	2.26577	1.47515	1.53871	1.70079	-1.06407	1.63637	1.02669	1.23767	1.1318	-0.188195	0.130323	2.41859	2.3446	1.06204	0.12671	1.09285	0.920308	1.65485	0.833048	1.53469	1.07992	0.676512	2.87067	2.51192	-0.0813269	0.577453	1.25256	0.807728	0.927443	1.43019	1.96336	2.77255
AGAGCAGAGGCATGCA-1_1	Cancer_HGSOC1	8693	2682	10.4912	NA	NA	1	1	0.306808	Singlet	Tumor	Macrophage	myeloid	0.679731	0.353413	1.15747	0.512748	0.480212	0.420208	0.983497	1.30076	0.00455485	0.729553	1.02662	2.20758	-0.333802	-0.518292	0.451461	0.406996	0.210046	0.431351	-0.406262	0.493652	2.13493	0.467478	1.53337	0.914795	1.89476	2.74425	0.724589	1.33138	-0.0857867	2.2288	0.192045	0.313406	-0.2347	-0.893892	0.522506	0.97662
AGAGCAGCAAGGCTTT-1_1	Cancer_HGSOC1	47221	6760	13.4876	NA	NA	0	0	0.299735	Singlet	Tumor	Epithelial_cells	epithelial	1.50897	1.9748	-0.514216	1.55608	0.324966	1.78869	2.97259	2.11314	0.956879	2.10739	1.44876	1.38515	1.71192	2.28317	0.371218	3.21656	2.53977	1.86223	2.85645	2.20989	2.43219	2.08357	1.68264	1.24828	0.676226	0.557767	2.56931	2.1125	-1.06556	-0.844584	2.87207	1.94664	1.79946	1.66045	1.55176	1.36658
AGAGCAGCACCAGTTA-1_1	Cancer_HGSOC1	1653	796	5.86812	NA	NA	4	4	0.222812	Singlet	Tumor	NK_cell	T	-0.49406	-1.19498	-1.90874	-1.43418	-0.527977	-0.989366	-1.02292	-1.53156	-0.557337	-1.07944	-0.0311588	-1.08058	-1.22243	-0.978198	-0.17987	-0.113376	-0.486201	-1.3773	-0.96826	-1.00908	-0.0454438	-0.902246	-0.59535	-1.10329	-0.706821	-0.891634	-1.35072	-1.4767	1.05821	-0.606194	-0.659056	-1.01995	-1.64093	-0.811851	-0.294488	0.72596
AGAGCAGCATCGCTGG-1_1	Cancer_HGSOC1	4557	1734	8.44854	NA	NA	3	3	0.215738	Singlet	Tumor	NK_cell	NK	-1.42105	-0.778738	-0.0466381	-0.593535	-0.910591	-0.510592	-0.174057	-0.576825	-0.232826	-0.768793	-0.793536	-0.574728	-0.238371	-0.420098	-0.566563	-0.508781	-0.4848	-0.576346	-0.3235	-0.176858	-1.5638	-0.440169	-0.439877	-0.752098	-0.385635	-0.747642	-0.763457	-0.528592	-0.296424	0.288782	-0.673423	-0.504111	-0.551669	-0.373868	-0.221746	-1.13136
AGAGCAGTCCAGTGTA-1_1	Cancer_HGSOC1	10863	1668	6.7937	NA	NA	10	10	0.219275	Singlet	Tumor	B_cell	B	-0.447809	-0.613021	-0.179457	-0.379161	-0.807771	-0.655173	-0.510065	-0.455725	-0.470496	-0.813981	-0.932699	-0.878275	-0.450619	-0.477925	-0.580356	-0.488316	-0.109763	-0.765278	-0.400921	-0.808784	-1.01197	-0.63568	-0.833936	-0.593262	0.0737875	0.0648366	-0.0743377	-0.115616	0.10752	-0.425936	-0.829668	-0.475823	-0.502628	-0.48251	-0.171458	0.0599351
AGAGCAGTCCTCAGGG-1_1	Cancer_HGSOC1	11189	3246	12.0654	NA	NA	0	0	0.300619	Singlet	Tumor	Epithelial_cells	epithelial	0.528244	0.686253	-1.24532	0.361374	0.658687	0.686084	1.70852	0.663153	-0.458956	1.31935	0.975709	0.113376	0.549401	0.07873	-0.057764	1.13604	1.00637	-0.366129	-0.196051	0.245953	2.44691	0.277466	0.804215	0.315878	-0.283038	-0.654089	-0.480228	-0.447588	0.453109	-0.982373	0.138365	0.04594	0.508949	0.422666	2.31344	1.07885
AGAGCAGTCTCTATAC-1_1	Cancer_HGSOC1	3881	1625	8.37413	NA	NA	3	3	0.162688	Singlet	Tumor	NK_cell	NK	-0.913979	-0.664572	1.09292	-0.604068	-0.162145	-0.564133	-0.728902	-0.281287	-1.54666	-0.453446	-0.211194	0.0119229	-0.36233	-0.342862	-0.395866	-0.394913	-0.469768	-0.611876	-0.273768	-0.855732	-0.0761492	-1.06492	-0.507211	0.784356	0.0793455	-0.0655074	-1.11252	-0.622586	0.579138	0.849957	-0.0671461	-0.326701	-0.702241	-0.752126	0.267848	-0.0717938
AGAGCAGTCTGGCCGA-1_1	Cancer_HGSOC1	7243	1630	16.2088	NA	NA	8	8	0.211317	Singlet	Tumor	B_cell	B	0.451655	-0.914077	-0.570608	-0.536289	-0.896119	-1.01608	-0.945383	-0.984353	-0.606945	-0.738727	-0.803663	-0.541529	-0.356275	-0.639647	-0.605576	-0.322432	-0.59954	-0.593601	-0.126514	-0.507721	-1.53794	-0.10387	-0.679436	-0.757755	-0.877695	-0.576944	-0.545354	-0.224393	0.343597	-1.09604	-0.710914	-0.059086	-0.435303	-0.424861	-0.643914	-0.938012
AGAGCCCAGTACCATC-1_1	Cancer_HGSOC1	3119	1308	23.3408	NA	NA	4	4	0.189213	Singlet	Tumor	T_cells	T	1.71534	-1.1083	-0.416007	-1.14734	-0.592533	-0.796026	0.537709	-0.168079	0.0242319	-0.46373	-0.50721	-0.680295	-0.842241	1.17686	-0.775503	-0.430755	-0.693413	-0.930532	0.912825	-0.720395	0.525579	-0.657043	-0.710409	-1.14896	-0.764276	-0.438591	-1.2539	-0.934306	0.676128	-0.539696	0.242286	-0.900913	-0.856076	-0.755554	-0.595806	-0.519464
AGAGCCCCACATTCTT-1_1	Cancer_HGSOC1	1225	657	21.7143	NA	NA	4	4	0.199823	Singlet	Tumor	NK_cell	T	0.312887	-1.26856	-0.852274	-1.28576	-0.304049	-0.971849	-1.24493	-1.07477	0.0601869	-0.825783	-0.64224	-1.42057	-1.18157	-1.059	-0.426865	-0.760138	-0.909735	-1.06883	-1.10008	-0.862255	-0.404862	-0.813785	-1.0182	-1.18353	-1.15473	-0.944721	-1.57137	-1.28149	1.30133	-0.30345	-1.15822	-1.48604	-1.55027	-1.05932	-0.621454	-1.15375
AGAGCCCCACTATCCC-1_1	Cancer_HGSOC1	8273	2513	15.7863	NA	NA	1	1	0.268789	Singlet	Tumor	Macrophage	myeloid	-0.0965018	-0.314814	1.06089	0.255201	0.0218449	-0.545019	-0.388337	0.666529	-0.266238	-0.543292	1.49225	1.21101	-0.413712	-0.456355	0.17602	-0.205772	-0.409205	-0.954874	-0.730497	-0.393596	-0.244368	0.0755992	0.0645774	0.731835	0.95011	2.5584	-0.428066	0.310056	-0.203466	1.81089	0.536635	0.196936	-0.296795	-0.696883	0.0827046	-0.184191
AGAGCCCCACTCATAG-1_1	Cancer_HGSOC1	4901	1919	6.67211	NA	NA	3	3	0.157383	Singlet	Tumor	NK_cell	NK	-0.760998	-0.540431	0.489448	-0.416413	-0.780592	-0.812581	1.26799	-0.0052911	0.457647	0.0368062	-0.784429	-0.471254	-0.293325	-0.389428	-0.542819	-0.681879	-0.419959	0.0529013	-0.445703	-0.467494	-1.33841	-0.287306	-0.0819244	0.681671	0.423516	0.519608	-0.662138	-0.257453	0.577371	0.743656	-0.0822233	0.0777633	-0.394506	-0.602328	-0.0171087	-0.285728
AGAGCCCGTCGAATGG-1_1	Cancer_HGSOC1	6797	2272	24.3196	NA	NA	2	2	0.183024	Singlet	Tumor	T_cells	CD4T	-0.754302	-0.217421	0.316132	-0.0792731	0.106018	-0.0485618	0.373328	0.224477	-0.456088	-0.445794	0.0543165	0.199451	-0.498315	-0.264607	-0.191338	-0.273775	-0.590232	-0.374344	-0.0772801	-0.105647	-1.18698	0.125502	0.572463	0.0133093	0.590838	-0.088505	-0.468484	-0.469781	-0.366649	1.16983	0.0144402	-0.0058133	-0.224087	-0.126166	-0.0143077	0.114824
AGAGCCCGTTTGAAAG-1_1	Cancer_HGSOC1	3965	1728	7.28878	NA	NA	3	3	0.173298	Singlet	Tumor	NK_cell	NK	-0.994535	-0.317446	0.813087	-0.0120069	-0.650413	-0.609921	-0.299824	-0.501074	-0.911558	0.378008	-0.413343	0.337039	-0.28422	-0.468731	-0.493947	-0.400067	-0.454252	-0.331653	-0.457381	-0.220414	-0.661007	-0.321939	-0.294323	0.160841	-0.119348	0.533327	0.327208	0.366709	0.614057	0.654873	-0.137966	-0.330321	-0.436319	-0.653994	-1.12862	0.0624828
AGAGCCCTCTAGTCAG-1_1	Cancer_HGSOC1	3060	1311	11.5359	NA	NA	3	3	0.205128	Singlet	Tumor	NK_cell	NK	-1.0628	-0.847528	0.0361136	-0.453266	-0.120512	-0.683775	-0.155638	-1.17502	-0.893413	-0.276757	-0.830886	-0.442358	-0.741758	-0.715484	-0.553176	-0.432599	-0.611298	-0.212608	-0.37326	-1.16057	-0.780227	-0.240124	-0.516794	-0.111614	0.406422	-0.38753	-1.08279	-0.539295	0.38858	-0.906456	0.251507	-0.900652	-1.02612	0.10655	-0.523204	-0.654206
AGATAGAAGCAAGGAA-1_1	Cancer_HGSOC1	20217	4103	6.5341	NA	NA	1	1	0.322723	Singlet	Tumor	Monocyte	myeloid	-1.37744	1.20872	1.65895	1.13794	0.385532	0.745237	-0.280503	1.45765	0.341157	0.802385	0.930197	2.14394	1.09182	1.20229	0.0236901	0.41333	1.38485	1.72529	1.42147	0.445829	1.61777	1.15278	1.06143	2.38884	1.88003	2.52262	-0.173033	0.755707	-1.23223	2.39012	0.622313	1.74018	1.45962	1.75761	0.0447888	0.464152
AGATAGAAGCACAAAT-1_1	Cancer_HGSOC1	25033	4582	22.5982	NA	NA	8	8	0.328912	Singlet	Tumor	Epithelial_cells	B	-0.458473	0.877724	0.0634904	1.21297	0.396301	1.40561	1.80291	1.12858	2.06989	0.728148	1.84189	1.40853	0.525276	0.435161	0.550249	1.41844	1.43279	0.66585	0.710328	0.919453	1.67398	1.78695	0.90862	0.385457	0.602641	-0.269833	1.77771	1.64878	0.883296	0.554308	0.964148	0.706064	0.404728	0.45364	1.5556	-0.0503123
AGATAGAAGCCGGAAT-1_1	Cancer_HGSOC1	5767	1819	17.3574	NA	NA	1	1	0.311229	Singlet	Tumor	Macrophage	myeloid	-1.2454	-0.740604	-0.358613	-0.729331	-0.0725574	-0.349704	-0.823677	0.134404	-1.41764	0.0585211	0.448053	0.104667	-0.178315	-0.300649	-0.272692	-0.973232	-0.557574	-0.659017	-0.0651184	-0.873718	0.817528	-0.45519	-0.285648	-0.708413	-0.115101	0.388606	-0.115249	-0.110596	0.584212	0.758097	-0.394607	-0.220695	-0.522728	-0.905946	0.0280382	0.408815
AGATAGAAGTGGATTA-1_1	Cancer_HGSOC1	1807	869	1.66021	NA	NA	0	0	0.314766	Singlet	Tumor	Epithelial_cells	epithelial	0.302833	-0.372561	-0.89293	-0.243337	-0.529821	-0.669114	0.28074	-0.284921	0.294623	-0.581315	0.0701209	-1.07672	-0.925973	-0.702888	-0.342461	0.0175589	-0.0216091	-0.30221	-1.18267	-0.454982	0.076016	-0.58673	-1.14337	-1.41628	-1.16442	-0.657126	-1.19562	-1.3971	1.24132	-1.19752	-0.893081	-0.891535	-1.0419	-0.317616	-0.0936381	-1.27524
AGATAGAAGTTCATGC-1_1	Cancer_HGSOC1	60433	8358	4.61999	NA	NA	0	0	0.301503	Singlet	Tumor	Epithelial_cells	epithelial	2.0073	2.29587	-0.394621	2.58568	0.579238	2.81321	3.1959	2.16717	0.380404	2.37249	1.74724	1.9014	1.71185	1.49468	1.00286	3.82266	3.48453	1.21442	1.17238	2.13769	2.56258	2.7078	1.865	1.6354	1.34112	0.6932	2.15067	2.01868	-0.152272	-0.327508	2.89716	1.98452	1.49148	1.98959	2.91076	2.06019
AGATAGATCCGTATGA-1_1	Cancer_HGSOC1	9600	2712	13.2188	NA	NA	8	8	0.219275	Singlet	Tumor	T_cells	B	-1.75809	-0.439286	-0.208111	0.292534	-0.0626704	-0.320031	-0.600499	0.41688	-0.450126	0.755107	-0.67446	-0.402969	-0.305238	0.408842	-0.322996	-0.251375	-0.165756	-0.09108	1.4749	-0.712013	0.54132	-0.0680459	0.249293	0.219742	-0.104392	0.360262	-1.15175	-0.173829	-0.188657	0.350423	0.976717	-0.0745209	-0.321754	-0.849757	-0.625181	-0.501431
AGATCCAAGCTCCGAC-1_1	Cancer_HGSOC1	4414	2101	5.32397	NA	NA	3	3	0.222812	Singlet	Tumor	NK_cell	NK	-0.485822	-0.482995	0.216029	-0.103123	-0.336505	-0.127505	-0.70471	-0.590463	-1.4018	-1.10699	-0.747908	-0.578086	-0.630289	-0.279958	-0.514339	-0.489813	-0.289932	-0.749369	-0.464907	-1.11605	-1.07394	0.0777554	-0.843437	0.699957	-0.662699	-0.564405	-1.07376	-0.446171	0.0263966	-0.0323467	0.16113	-0.249995	-0.0544384	0.168856	-0.613538	-1.28096
AGATCCAAGGAGCAAA-1_1	Cancer_HGSOC1	1613	857	11.2833	NA	NA	4	4	0.242263	Singlet	Tumor	T_cells	T	-0.577455	-1.33688	0.340503	-1.29243	-0.42444	-0.740184	-0.256573	-0.697459	-0.0760229	-0.779091	-0.507913	-0.568067	-1.01024	-0.936444	-0.311495	-0.629177	-0.880499	-0.962088	-0.545818	-1.1602	-1.14031	-1.3302	-1.17849	-0.68661	-0.497526	-0.599881	-0.840199	-0.851971	0.915642	-0.852801	-0.610395	-1.34221	-1.08775	-0.742141	-0.242137	-1.01007
AGATCCAAGGCCCAAA-1_1	Cancer_HGSOC1	3587	1464	16.058	NA	NA	1	1	0.320955	Singlet	Tumor	Macrophage	myeloid	-1.14447	-0.358618	-0.520989	-0.864475	0.354639	-0.351383	0.22028	0.158876	-1.42726	0.330135	0.761336	0.537765	-0.933872	-0.618151	-0.104599	0.0943023	-0.0458379	-0.725787	-0.222588	-0.713187	2.05832	-0.114214	-0.0756078	-0.23427	-0.466806	0.0602992	-0.911943	-0.825185	0.525046	0.681753	-0.257118	-0.663952	-1.13263	-0.905377	0.043188	-0.26044
AGATCCAAGTAGAATC-1_1	Cancer_HGSOC1	5521	2192	2.35465	NA	NA	3	3	0.253758	Singlet	Tumor	T_cells	NK	1.31848	-0.418009	0.305075	-0.447884	-0.701779	-0.576844	1.51339	0.0807218	0.62598	-0.10671	-1.00752	0.216406	-0.410546	-0.269584	-0.765877	-0.12092	0.0198561	-0.00863574	-0.630966	-0.476787	-0.503921	-0.394056	-0.148604	-0.0686569	-0.21885	0.115227	0.726078	0.541213	0.356161	0.882111	-0.397815	-0.123225	-0.171672	-0.318403	-1.2093	-0.595032
AGATCCAAGTGGTGAC-1_1	Cancer_HGSOC1	5642	2106	7.58596	NA	NA	3	3	0.19275	Singlet	Tumor	NK_cell	NK	-0.467663	-0.0326077	0.894406	-0.262399	-0.90104	-0.145825	0.558958	-0.336101	-0.176598	0.34026	-0.782701	0.96673	-0.482874	-0.152309	-0.616348	-0.356998	-0.407366	-0.381505	-0.222325	-0.248729	-1.4208	-0.105492	-0.485646	0.627106	0.288633	0.24951	-0.39051	-0.124548	-0.221282	-0.317483	-0.351884	-0.29271	-0.209464	-0.621522	-1.0057	-0.0708781
AGATCCAAGTGTTGTC-1_1	Cancer_HGSOC1	1473	858	14.5282	NA	NA	4	4	0.211317	Singlet	Tumor	NK_cell	T	-0.552025	-1.13433	0.0931475	-0.855024	0.595676	-0.284545	-1.02734	-0.499405	1.06495	-0.557645	-0.320214	-1.29678	-1.14255	-0.954313	-0.432206	-0.669225	-1.05578	-1.29606	-0.906435	-1.13194	0.776031	-0.921915	-1.22414	-0.692534	-1.15812	-0.498405	-0.359183	-0.308671	1.23166	-0.0962749	-0.499178	-0.975996	-1.60794	-1.06893	-0.39915	-0.447543
AGATCCACAAGGTTGG-1_1	Cancer_HGSOC1	17259	4146	16.2118	NA	NA	1	1	0.317418	Singlet	Tumor	Macrophage	myeloid	1.07389	0.565685	1.09596	1.71044	1.26584	1.20778	0.706439	1.59567	0.0368996	1.02366	1.76285	2.44378	0.551914	-0.0252859	0.417809	0.0421387	0.413119	0.315025	0.227345	1.63319	0.644097	1.91281	2.03948	2.31985	1.77308	2.74315	0.609409	0.746235	-0.427344	2.1264	1.17788	1.49732	0.63899	0.390151	0.727818	1.16849
AGATCCACACAGAGCA-1_1	Cancer_HGSOC1	11805	3289	16.3829	NA	NA	0	0	0.289125	Singlet	Tumor	Epithelial_cells	epithelial	1.20241	0.725576	-1.25689	0.346584	0.699787	0.522581	0.0318071	0.804605	-0.502356	0.426902	-0.197582	-0.458816	0.972352	0.61873	-0.239531	0.769126	0.37808	0.177793	0.258761	-0.0649757	-0.318891	0.0364654	0.272813	-0.117552	-0.350888	-0.493361	0.100282	-0.199528	0.0744455	-1.47017	0.181872	0.221212	0.543806	1.25017	0.950523	0.20562
AGATCCAGTGCCGTAC-1_1	Cancer_HGSOC1	2231	1021	11.1609	NA	NA	0	0	0.265252	Singlet	Tumor	Epithelial_cells	epithelial	1.4354	-0.350358	-0.797502	-0.646964	-0.902844	-0.803941	-0.550343	-0.97309	0.0614941	0.245733	0.416961	-0.941045	-0.454986	-0.872995	-0.553849	-0.233744	-0.121912	-0.0490847	-0.906794	-0.818263	-0.551539	-0.646517	-0.93434	-1.57391	-1.33853	-0.25261	-0.873041	-1.30283	1.39998	-1.23872	-0.812075	-0.766237	-0.47893	-0.604072	-0.666176	-0.443052
AGATCCAGTTCGGACC-1_1	Cancer_HGSOC1	17305	3496	10.2456	NA	NA	1	1	0.260831	Singlet	Tumor	Macrophage	myeloid	0.618224	1.43861	1.2638	0.874345	0.908835	0.50648	-0.831639	1.45681	1.58207	0.263625	1.37923	1.93132	0.422428	0.396342	0.3668	0.223996	0.108887	0.368637	0.274316	0.411376	0.33682	0.142951	1.1332	1.30632	2.18736	3.49718	0.213851	0.623245	-0.195565	2.99469	0.325947	0.768932	0.755641	0.0418916	0.339535	1.72054
AGATCCATCATCGACA-1_1	Cancer_HGSOC1	1511	785	2.18398	NA	NA	0	0	0.313882	Singlet	Tumor	Epithelial_cells	epithelial	0.627629	-0.780578	-1.21274	-0.547799	0.707284	-0.810899	0.22604	-0.738454	0.672875	-0.22962	0.29129	-0.666998	-1.03843	-0.67283	-0.334275	-0.422565	-0.231342	-0.713958	-0.962785	-0.501303	-0.0466493	-0.781924	-1.20879	-1.80422	-1.02654	-0.722943	-0.913546	-1.05489	1.35963	-0.159219	-0.96606	-1.06907	-1.08876	-0.585109	-0.484824	-1.21816
AGATCGTAGATTGTGA-1_1	Cancer_HGSOC1	8314	2951	20.4955	NA	NA	4	4	0.249337	Singlet	Tumor	NK_cell	T	1.6553	-0.00305057	0.611546	0.727032	0.404424	1.08205	1.38539	1.08865	0.258166	-0.0551349	0.617596	0.685833	0.174334	-0.096576	0.348482	1.26367	0.314797	-0.430123	0.170166	-0.0624151	1.20582	-0.101288	0.530112	0.814099	0.0480107	0.803283	-0.392531	0.105519	1.32758	-0.116106	1.0394	0.207728	0.141423	-0.0596262	1.06572	-0.0211362
AGATCGTAGCCTTTGA-1_1	Cancer_HGSOC1	2500	1020	20.36	NA	NA	3	3	0.166225	Singlet	Tumor	NK_cell	NK	-0.734854	-0.830091	0.105284	-0.969804	0.163493	-0.405196	1.72376	-0.149326	-0.846574	-0.829864	-0.379889	-0.172027	-1.20052	-0.767765	-0.321137	0.615423	0.0931599	-0.987184	-0.825122	-0.744248	-0.0633748	-0.679718	-0.148151	1.02264	-0.0833751	0.339125	-0.803907	-0.663654	0.701775	0.784025	-0.264016	-0.492541	-1.47779	-0.926832	-0.657538	-0.846304
AGATCGTAGCTCCACG-1_1	Cancer_HGSOC1	22556	4526	10.7377	NA	NA	1	1	0.319187	Singlet	Tumor	Monocyte	myeloid	-1.31013	1.29787	1.67034	0.958181	-0.384168	0.766798	-0.730995	1.40515	-0.424795	0.523531	1.11607	2.35297	1.36424	0.249886	-0.137191	-0.388711	0.0985788	0.880956	0.736521	0.506272	0.561042	1.18479	0.83316	0.898014	1.09911	3.03146	0.994433	1.30047	-0.889265	1.69502	1.01022	1.28915	1.25398	0.820267	0.333549	1.576
AGATCGTCAACCGATT-1_1	Cancer_HGSOC1	3924	1787	4.89297	NA	NA	3	3	0.204244	Singlet	Tumor	NK_cell	NK	0.260609	-0.254149	0.990481	-0.568956	-0.508483	-0.326653	0.0208251	-0.53563	-0.187292	-0.466576	-0.412286	0.280648	-0.153545	-0.468957	-0.521779	-0.756584	-0.935518	-0.628213	-0.803935	-0.672854	-0.441309	-0.19412	-0.141621	0.0852984	0.341005	0.244682	-0.253397	-0.256739	0.407015	0.0335349	-0.395756	-0.683667	-0.382462	-0.339982	-0.193517	-0.851525
AGATCGTCACCGTGAC-1_1	Cancer_HGSOC1	4444	1748	4.72547	NA	NA	3	3	0.145889	Singlet	Tumor	NK_cell	NK	0.43313	-0.393345	0.981407	-0.707282	-0.713549	-0.121813	-0.489843	-0.0544637	0.0990903	0.223429	-0.538009	-0.179882	-0.726819	-0.91452	-0.500657	-0.281976	-0.876934	-0.259099	-0.798348	-0.979374	0.0766191	-0.752347	0.112322	0.42175	0.547177	0.317625	-0.456482	-0.144705	0.505833	1.57363	-0.303573	-0.483177	-0.697955	-0.899556	-0.125971	0.0945563
AGATCGTCATGTGTCA-1_1	Cancer_HGSOC1	2877	789	24.0181	NA	NA	0	0	0.253758	Singlet	Tumor	Epithelial_cells	epithelial	0.422297	-0.58836	-0.470296	-0.58994	-0.270438	-0.254531	0.0271152	-0.857682	-0.246508	-0.385318	0.611665	-0.498729	-1.0325	-0.711118	0.378163	-0.606165	-0.512483	-0.548012	-0.840413	0.600477	-1.08179	-0.28642	0.147396	-1.76992	-0.867434	-0.116804	-1.21529	-1.11342	0.896248	0.348203	-0.884149	-0.419264	-0.888935	-0.184865	-0.318103	-0.964503
AGATCGTGTCAGGCAA-1_1	Cancer_HGSOC1	8446	2530	13.2252	NA	NA	1	1	0.259063	Singlet	Tumor	Monocyte	myeloid	-1.97126	0.336147	0.538671	0.0535328	-0.563025	-0.595638	0.703094	0.129226	0.213448	0.119727	0.755296	1.0821	-0.0370659	-0.510499	-0.215164	-0.39809	-0.165096	-0.297508	-0.238463	0.0104411	-0.616499	-0.0217824	0.542787	-0.142427	-0.0618952	0.970314	-0.105477	-0.272979	-0.340665	2.21511	-0.199477	0.10124	-0.0686151	-0.379476	-0.109879	0.448687
AGATCGTTCTCTGGTC-1_1	Cancer_HGSOC1	2255	894	16.7627	NA	NA	4	4	0.202476	Singlet	Tumor	T_cells	T	-0.613949	-0.958181	-0.735126	-1.12511	-0.485011	-0.947753	-0.138776	-0.345769	-0.697923	-1.0063	-0.811391	-0.484428	-1.17768	-0.640047	-0.456235	-0.506707	-0.360926	-0.986163	-0.736281	-0.808781	-0.849895	-0.933128	-0.366079	-0.0927258	-0.802081	-0.291811	-1.15232	-0.603383	0.659613	0.00285696	-0.716522	-0.997763	-1.24463	-0.568399	-0.631068	-1.29834
AGATCGTTCTTTCAGT-1_1	Cancer_HGSOC1	3584	1729	4.6875	NA	NA	3	3	0.196286	Singlet	Tumor	NK_cell	NK	-0.353079	-0.38331	0.508477	-0.847813	-0.187501	-0.186677	0.545333	-0.669421	-0.990523	-0.717321	-0.217939	0.333577	-0.653014	-0.229093	-0.862483	-0.887952	-0.464058	-0.594002	-0.0202023	-0.879065	0.27734	-0.125351	-0.675577	-0.841327	-0.0321385	-0.0493773	-0.105915	0.0229402	0.899547	-0.833657	-0.553512	-0.764447	-0.383474	-0.606554	-0.550856	-1.72061
AGATGAAAGCTAGAAT-1_1	Cancer_HGSOC1	7869	2557	16.3045	NA	NA	1	1	0.259947	Singlet	Tumor	Macrophage	myeloid	-0.965477	-0.0642056	0.771453	-0.40576	-0.483698	0.0574521	0.507747	0.433609	-0.647095	0.270184	1.03034	1.55832	-0.0217134	-0.176339	-0.284994	-0.0523604	-0.0592127	-0.729919	-0.125877	-0.978976	-0.799592	-0.12888	0.0157089	0.927511	0.232578	1.78035	0.172795	0.458863	0.658004	2.11605	0.245	0.185854	-0.435995	-0.410953	-0.145028	0.785597
AGATGAAAGGTGCTAG-1_1	Cancer_HGSOC1	61621	4315	1.87598	NA	NA	8	8	0.221043	Singlet	Tumor	B_cell	B	-2.28384	0.483141	1.35971	1.05206	-0.0380909	0.477402	2.14799	1.17988	1.52984	0.199437	-0.403495	1.50428	0.864942	0.576937	-0.527179	0.562146	1.02829	0.681078	0.750445	0.484339	-1.08571	1.13435	0.819263	1.5217	1.33168	0.702944	1.14205	1.85159	-2.14618	-0.430256	0.921502	0.909333	0.718463	0.359241	-0.171667	-0.753379
AGATGAACAGCAGGAT-1_1	Cancer_HGSOC1	15949	3872	22.1268	NA	NA	10	10	0.225464	Singlet	Tumor	NK_cell	B	0.798703	0.515451	1.56958	1.05876	0.399661	0.846013	1.13207	0.793572	-0.722393	1.43342	-0.0763476	0.533794	0.331696	0.665743	-0.449135	0.552757	0.88434	0.157773	0.931072	0.0527564	1.61989	0.4462	0.797349	1.02271	1.37206	0.401203	0.684998	1.06879	-0.640662	0.769467	0.518037	0.937912	0.894606	-0.11997	0.055318	-0.183771
AGATGAACAGGCATGA-1_1	Cancer_HGSOC1	7452	2260	11.3392	NA	NA	1	1	0.268789	Singlet	Tumor	Monocyte	myeloid	0.365768	0.0512532	0.263258	0.536013	-0.233272	-0.284745	0.10836	0.849068	-0.780075	0.13382	0.756427	0.652758	0.0483843	-0.262897	0.0370605	0.0500377	0.0843174	-0.438698	-0.345738	0.122669	0.503526	-0.00218921	0.709423	0.855776	1.27508	1.89002	-0.206827	0.0433653	0.184141	2.18989	0.217588	-0.468614	-0.337305	-0.467491	0.678071	0.0733145
AGATGAAGTCGCATGC-1_1	Cancer_HGSOC1	23679	4556	8.86862	NA	NA	1	1	0.344828	Singlet	Tumor	Monocyte	myeloid	-1.57675	1.32417	1.68989	1.23756	1.96498	0.433145	-0.530371	1.35112	-1.08672	0.513061	0.928027	1.66438	1.88461	1.81045	0.286412	0.569702	0.849892	1.27416	1.40888	0.996201	0.535971	-0.261837	0.995418	1.67363	1.77292	2.40951	-0.863552	0.197836	-1.84471	2.70867	0.751586	1.97026	1.8532	3.26659	-0.0481006	1.36572
AGATGAAGTGGTTTGT-1_1	Cancer_HGSOC1	10114	2873	23.9272	NA	NA	1	1	0.290009	Singlet	Tumor	Macrophage	myeloid	-1.09718	0.677194	1.27336	0.684862	1.94997	0.78076	1.14299	1.2489	0.0432092	1.33026	2.19479	2.03758	-0.0240964	0.229331	0.507362	0.439246	0.53908	0.00667906	0.163904	-0.0303608	0.705383	0.213263	1.40203	1.40585	1.19311	2.50419	-0.456008	0.265799	-0.540184	2.67006	0.879955	0.513646	0.07496	-0.150431	0.446347	0.543926
AGATGAATCTCTTCAA-1_1	Cancer_HGSOC1	8712	2875	9.21717	NA	NA	1	1	0.269673	Singlet	Tumor	Monocyte	myeloid	-1.1017	0.0461133	0.970348	0.0360508	1.2772	0.343409	-0.116966	0.600578	-0.804436	0.0698542	0.727498	1.2811	0.0311665	-0.00647589	-0.0600069	0.00648891	0.195927	-0.115531	0.465597	-0.511123	1.83261	0.521285	-0.0400808	0.554766	1.35494	2.14656	0.80679	0.999631	-0.156087	1.0462	0.312634	-0.110965	0.0737571	0.38587	-0.452068	0.839886
AGATGCTAGCGAAACC-1_1	Cancer_HGSOC1	9256	2882	12.6729	NA	NA	1	1	0.259063	Singlet	Tumor	Macrophage	myeloid	0.194522	0.653785	0.903311	0.0209055	0.489371	-0.0757106	0.346183	1.1685	0.0847262	0.0291532	1.26923	1.27359	0.182426	-0.256781	0.168379	-0.533666	-0.671582	0.364574	-0.102736	-0.468723	0.539431	0.762095	0.0936219	0.931254	0.95234	1.89742	-0.110042	0.210525	-0.266615	1.57551	-0.0538979	-0.174715	0.0682982	0.360731	0.183335	-0.1678
AGATGCTAGCGATGAC-1_1	Cancer_HGSOC1	2542	1082	21.6365	NA	NA	4	4	0.214854	Singlet	Tumor	NK_cell	T	-0.807945	-1.19083	-0.526201	-1.40246	-0.841059	-0.679601	0.464049	-0.97806	-0.618774	-0.680842	-0.58168	-0.746885	-1.22445	-0.645325	-0.465905	-0.809405	-0.675998	-1.12396	-0.522688	-1.06833	-0.536185	-0.495424	-0.565665	0.343236	0.210889	-0.369157	-0.806227	-0.653934	1.23471	-0.648824	-0.705917	-0.894504	-1.0978	-0.601563	-0.7363	-1.13893
AGCATCAAGCCGATAG-1_1	Cancer_HGSOC1	7635	1833	23.4316	NA	NA	1	1	0.29443	Singlet	Tumor	Monocyte	myeloid	-0.0719159	-0.425413	0.228009	-0.214271	0.162572	0.026672	-1.21702	0.518071	-0.881209	-0.245605	1.09218	0.635804	-1.03011	-0.429303	0.0824103	0.318035	0.360985	-0.804557	-0.584747	-1.09062	0.642722	-0.683332	0.310577	0.853299	1.00045	1.323	-0.309084	0.188984	0.536573	1.30026	-0.20096	-0.226282	-0.867549	-0.539197	0.567375	-0.287873
AGCATCAAGGCTCACC-1_1	Cancer_HGSOC1	6533	1697	10.0719	NA	NA	12	12	0.223696	Singlet	Tumor	B_cell	B	-1.4112	-0.185685	0.281143	-0.624247	-1.24578	-0.719967	-1.12909	-0.893698	-0.503658	-0.870186	-0.544872	-0.931333	-0.387814	-0.350022	-0.714452	-0.665889	-0.428762	-0.472204	-0.511869	-0.959619	-0.86343	-0.205471	-0.145513	-0.498633	0.14537	-0.457974	-1.09042	-0.828109	-0.116632	-1.15811	-0.336347	-0.569252	-0.0736941	-0.404973	-0.207687	-1.13017
AGCATCACAAAGGATT-1_1	Cancer_HGSOC1	16061	4085	22.8504	NA	NA	1	1	0.345712	Singlet	Tumor	Macrophage	myeloid	-1.04026	0.121002	1.95542	0.953459	0.588833	0.998535	0.966027	1.37807	-0.323605	0.696803	1.2077	2.29425	0.771254	3.00934	0.333661	0.116515	0.652298	0.401955	2.64607	0.342431	2.37936	0.240889	0.52219	1.43554	3.24635	2.38774	2.04999	2.32152	-0.701869	2.70675	2.50392	1.13629	1.15483	0.714742	0.09613	1.2719
AGCATCACAAAGGCGT-1_1	Cancer_HGSOC1	4255	1634	7.49706	NA	NA	3	3	0.20336	Singlet	Tumor	NK_cell	NK	-1.36709	-0.55046	0.195717	-0.751118	-0.179509	-0.222673	-0.427827	-0.311676	-0.293267	-0.539162	-0.717348	-0.87291	-0.614805	-0.631966	-0.218571	-0.701911	-0.543062	-0.148502	-0.226941	-0.411505	-0.425748	-0.926932	-0.344529	-0.187557	-0.33899	-0.328623	-0.875016	-0.597603	-0.230947	-0.579067	-0.0417582	-0.37195	-0.0608609	-0.718045	-0.0905704	-0.144186
AGCATCACACTTGGGC-1_1	Cancer_HGSOC1	5904	2244	20.7825	NA	NA	1	1	0.343943	Singlet	Tumor	Macrophage	myeloid	-0.344339	-0.526809	-0.0100086	0.0973876	-0.142932	-0.102523	-1.25309	-0.0355834	-0.51478	0.05845	0.895822	0.627916	-0.0870987	-0.370672	0.00621161	-0.415053	-0.160845	-0.0960361	-0.604784	-0.317748	0.252407	0.133139	-0.170694	-0.109662	-0.232715	0.250845	-0.0753145	-0.23254	0.553463	0.66674	0.360589	0.19287	-0.281833	-0.193565	0.406474	-1.0474
AGCATCAGTTCCTAAG-1_1	Cancer_HGSOC1	57187	8264	12.5868	NA	NA	0	0	0.303271	Singlet	Tumor	Epithelial_cells	epithelial	1.81057	1.96035	-0.693506	2.09095	0.52924	2.37798	1.84746	2.3518	-0.138223	1.95512	1.76119	1.27155	1.97205	3.52556	0.39631	2.76657	2.61427	1.69889	4.01512	2.0908	2.88866	2.0365	1.41414	1.03607	0.792255	-0.365285	1.05519	1.35289	-1.7768	-0.963188	4.20211	1.88821	1.72253	1.82459	2.67067	1.34871
AGCATCATCCGCAGTG-1_1	Cancer_HGSOC1	3134	1263	14.1034	NA	NA	4	4	0.219275	Singlet	Tumor	NK_cell	T	-0.976461	-1.22446	0.0501733	-0.700121	0.124397	-0.549484	1.35317	-0.228573	-0.279383	-0.701176	-0.242954	-0.377728	-0.896641	-0.587959	-0.41394	-0.628541	-0.605824	-0.879952	-0.689284	-0.876416	-0.0221874	-1.02161	-0.317969	-0.25352	0.017909	-0.0506019	-1.32994	-0.960985	0.239377	0.247659	-0.640117	-0.569245	-0.81129	-0.738524	-0.100346	-0.526738
AGCATCATCCGTCACT-1_1	Cancer_HGSOC1	575	380	16.1739	NA	NA	1	1	0.267905	Singlet	Tumor	Monocyte	myeloid	-0.094292	-1.23019	-1.29322	-0.957756	0.27867	-1.1215	-0.793559	-1.43346	-0.609861	-0.872965	-0.101836	-1.016	-1.31887	-1.0532	-0.347961	-0.599336	-0.760361	-1.23427	-0.88029	-1.10047	-0.583407	-1.11953	-1.18825	-1.04624	-0.971906	-0.274927	-1.4906	-1.64024	1.18673	-0.0128509	-1.01195	-1.36737	-1.71273	-1.04599	-0.283536	-0.41671
AGCATCATCCTACACC-1_1	Cancer_HGSOC1	1959	626	0.918836	NA	NA	1	1	0.296198	Singlet	Tumor	Macrophage	myeloid	0.375641	-0.707967	-0.901408	-0.95771	-0.615272	-0.90473	-0.920385	-0.994415	-0.55497	-0.559712	-0.149934	-0.839593	-1.0915	-0.998903	-0.4082	-0.918182	-0.908642	-0.805388	-1.10746	-0.681419	-0.644091	-1.05083	-0.920325	-0.809458	-1.21768	-0.859915	-0.998212	-1.25451	1.33259	-0.64468	-1.28993	-1.12476	-1.0451	-0.642563	-0.880522	-0.832831
AGCCAATGTCCGGATC-1_1	Cancer_HGSOC1	46479	6886	17.1023	NA	NA	0	0	0.325376	Singlet	Tumor	Epithelial_cells	epithelial	0.215911	1.28676	-0.807993	1.29811	0.445559	2.0233	1.7043	1.75293	0.543119	1.24645	0.941465	0.97874	1.31698	0.482119	0.292817	2.43073	1.96295	1.01519	0.710091	1.35491	2.2513	1.92414	1.34535	0.881099	0.321511	-0.517883	0.696209	0.838892	-0.867663	-1.31889	2.1146	0.745671	1.20166	1.07089	2.19853	-0.249589
AGCCAATTCAGTGCGC-1_1	Cancer_HGSOC1	3506	1407	14.8317	NA	NA	3	3	0.23519	Singlet	Tumor	NK_cell	NK	-0.124676	-0.427685	-0.130086	-0.73046	-0.475	-0.26353	0.157529	-0.776351	-1.10547	-0.839292	-0.36659	-0.900798	-0.786673	-0.373996	-0.485727	-0.691765	-0.782237	-0.81054	-0.133846	-0.884113	-0.495737	-0.695327	-0.430076	-0.148544	-0.907418	-0.506785	-1.28977	-1.1845	0.728006	-0.966972	-0.226829	-0.770936	-0.55952	-0.675173	-0.500773	-0.47368
AGCCAATTCATCGCCT-1_1	Cancer_HGSOC1	11294	3373	12.5819	NA	NA	1	1	0.330681	Singlet	Tumor	NK_cell	myeloid	-1.23377	-0.247287	1.64717	1.0321	0.6643	0.475257	2.19084	0.286993	0.149289	0.552146	0.331717	2.33812	-0.0437448	0.231471	0.16167	-0.0931301	-0.197064	-0.444517	0.584836	-0.631108	0.269095	0.101509	0.607883	1.66951	1.01227	1.58616	-0.0210345	0.778455	-0.425192	2.1749	0.990241	0.18632	0.304906	-0.355448	0.203718	0.370324
AGCCAATTCCAGCACG-1_1	Cancer_HGSOC1	5193	1547	3.52397	NA	NA	0	0	0.297082	Singlet	Tumor	Epithelial_cells	epithelial	1.77401	-0.0412447	-1.4863	-0.571358	-0.446448	-0.758339	-1.24678	0.02249	0.854622	-0.0347841	-0.219961	-0.408701	-0.26489	-0.586682	-0.348285	-0.103365	-0.012826	0.202036	-0.840095	-0.166963	-1.06564	-0.576438	-0.535841	-1.1231	-1.02578	-1.26957	-0.489356	-1.33289	0.498958	-1.52038	-1.46502	-0.555602	0.255148	-0.431129	-0.210703	0.526514
AGCCAATTCGAGTTGT-1_1	Cancer_HGSOC1	5890	2143	7.97963	NA	NA	3	3	0.220159	Singlet	Tumor	NK_cell	NK	-1.16606	-0.0791853	0.404795	-0.671688	0.150175	-0.249742	1.81609	-0.0894314	-0.193441	-0.139492	-0.659616	-0.11493	-0.299955	-0.247936	-0.530182	-0.853438	-0.396555	-0.0855078	-0.274542	0.117741	-1.79997	-0.936667	0.246145	0.232487	0.15902	-0.214211	-0.50943	-0.424032	-0.859095	0.255442	-0.108876	0.145717	-0.260875	-0.195714	-0.298968	-0.270879
AGCCAATTCGGACTGC-1_1	Cancer_HGSOC1	2139	1098	17.1108	NA	NA	4	4	0.217507	Singlet	Tumor	NK_cell	T	-0.81292	-0.681029	-0.445715	-0.716183	-0.0902133	-0.839267	-0.0576979	-0.25534	-0.197551	-0.878605	-0.431278	-0.734766	-1.17552	-0.974972	-0.59169	-0.294427	-0.677384	-0.654629	-0.583789	-0.894782	-0.201584	-0.746858	-0.876216	0.311825	-0.46545	0.254087	-0.97934	-0.593977	0.499259	-0.266157	-0.246524	-1.29852	-1.44665	-1.02881	-0.0310625	-0.809463
AGCCACGAGCATGCGA-1_1	Cancer_HGSOC1	3797	1742	7.32157	NA	NA	5	5	0.225464	Singlet	Tumor	T_cells	CD8T	-0.136348	-0.18997	0.92168	0.352657	-0.5044	-0.547595	-0.984101	-0.457129	0.0404482	-0.179132	-0.76861	-0.520154	-0.573179	-0.6668	-0.269935	-0.0280415	-0.148488	-0.395571	-0.516174	-0.0529163	0.428576	-0.966277	-0.469608	-0.914925	0.172017	0.36384	-0.525116	-0.169811	-0.0619002	-0.25598	-0.416722	-0.14067	-0.372896	-0.233834	-0.468709	-1.49151
AGCCACGAGGTCGACA-1_1	Cancer_HGSOC1	17376	4055	3.27463	NA	NA	1	1	0.333333	Singlet	Tumor	DC	myeloid	-0.231098	1.05378	1.68299	1.04172	0.739236	0.938936	0.965835	1.39483	0.289582	1.01374	1.26188	2.02566	0.876325	0.963825	-0.10696	0.399988	0.602045	0.651766	1.03972	1.62051	1.3033	1.5381	1.8526	1.62971	1.85247	3.11947	1.64511	1.80707	-1.74898	3.62343	0.348695	1.4322	1.28112	0.924166	0.471803	0.834917
AGCCACGAGGTGAGAA-1_1	Cancer_HGSOC1	18545	4325	5.21434	NA	NA	1	1	0.240495	Singlet	Tumor	Macrophage	myeloid	1.37996	1.50095	1.52383	0.973252	0.375124	0.472499	1.14118	1.67813	1.10492	0.347455	1.69991	2.78257	0.79867	0.448804	0.285994	0.615107	0.821324	0.953564	0.573401	0.332411	2.40683	1.66747	1.4049	1.64878	2.6894	3.47842	2.47222	2.42226	-0.495645	3.10566	1.0288	1.44258	0.696087	0.634121	0.614779	1.92439
AGCCACGCACAGCATT-1_1	Cancer_HGSOC1	6768	2469	7.63889	NA	NA	3	3	0.160035	Singlet	Tumor	NK_cell	NK	-1.1403	-0.546925	1.17392	0.318822	-0.375812	-0.585209	0.369672	0.239317	0.0928765	-0.447553	-0.580285	0.787007	-0.0576132	-0.0838865	-0.475902	0.0675702	0.149608	-0.209061	-0.0359273	-0.027774	-0.167365	-0.368796	0.355829	0.752953	0.560143	0.256964	0.161592	0.176999	-0.200106	0.934198	0.137169	-0.0259939	0.194778	-0.267134	0.716497	-0.104062
AGCCACGCAGTTGCGC-1_1	Cancer_HGSOC1	2648	1229	9.7432	NA	NA	4	4	0.221927	Singlet	Tumor	NK_cell	T	0.7425	-1.04637	-0.0914816	-0.238564	-0.905045	-0.702367	0.805719	-0.682202	0.289143	-0.295876	-1.04258	-1.14285	-0.411884	-0.18034	-0.365244	-0.288922	-0.66686	-0.798352	-0.605639	-0.916928	-0.608014	-1.24854	-0.509419	0.04225	-0.965369	-0.0488805	-1.34395	-0.945404	0.76263	-0.298775	-1.04489	-0.843259	-0.969351	0.0379543	-0.825498	-0.777089
AGCCACGGTTACCTGA-1_1	Cancer_HGSOC1	1464	568	13.2514	NA	NA	4	4	0.221927	Singlet	Tumor	NK_cell	T	-0.28372	-1.13607	-1.20826	-1.08037	-0.69888	-0.806389	-1.21716	-1.41432	-0.0344353	-0.9563	-0.360871	-1.31892	-1.2098	-0.723335	-0.212243	-0.415652	-0.746585	-0.64193	-1.00123	-0.973633	-0.985692	-0.849935	-1.21233	-1.52503	-1.01921	-0.644453	-1.19017	-0.892992	0.839952	-0.542778	-0.871196	-1.31674	-1.31671	-0.69932	-0.138315	-0.868559
AGCCACGTCTAACGGT-1_1	Cancer_HGSOC1	10599	3041	10.8406	NA	NA	1	1	0.287356	Singlet	Tumor	Macrophage	myeloid	0.0699677	0.366067	0.572939	-0.28583	-0.583191	-0.0776677	-1.10125	0.700345	0.183925	0.38337	0.535682	0.916654	0.731133	0.204601	-0.230613	-0.175434	0.327279	0.276884	0.134283	-0.349115	1.1128	0.881511	0.0399806	0.539417	1.95266	1.25307	0.36421	0.644047	-0.53137	1.32203	0.33999	0.398616	0.258485	-0.55831	-0.673181	0.651498
AGCCACGTCTCGGCTT-1_1	Cancer_HGSOC1	5048	1996	7.23059	NA	NA	3	3	0.191866	Singlet	Tumor	NK_cell	NK	-0.192509	-0.523432	0.704499	-0.408494	-0.537038	-0.434219	-0.229792	-0.322516	-1.31628	-0.609521	-0.790958	-0.133529	0.181006	-0.102632	-0.431628	-0.57786	-0.483379	-0.613814	-0.308729	-0.64218	-1.03951	-0.554072	-0.43634	1.00945	0.0837453	-0.0940508	-0.963288	-0.676543	0.601165	0.611525	-0.302646	0.0775376	-0.024317	-0.0319637	-0.267758	-0.312842
AGCCAGCAGCTCCGAC-1_1	Cancer_HGSOC1	1952	1005	15.2152	NA	NA	4	4	0.20336	Singlet	Tumor	NK_cell	T	-0.0757603	-1.0543	-0.53782	-0.772182	-0.496822	-0.540953	0.116121	-0.957517	-0.794972	-1.0284	-0.888062	-1.1073	-1.02364	-0.891994	-0.474026	-0.515144	-0.82907	-0.997932	-0.903419	-1.24811	-0.338395	-1.02653	-1.40749	-0.21711	-0.0535664	-0.240047	-0.847163	-1.01443	1.18217	-0.136685	-0.544266	-1.22258	-1.31849	-0.577533	-0.193671	-0.203309
AGCCAGCAGTTGGAAT-1_1	Cancer_HGSOC1	1745	790	23.3811	NA	NA	4	4	0.199823	Singlet	Tumor	NK_cell	T	0.123909	-0.999944	-0.229189	-1.00559	-0.404272	-0.848133	1.03599	-1.1962	-1.10341	-1.1634	-0.686673	-0.873841	-1.30195	-0.652248	-0.587093	-0.503616	-0.813955	-1.22116	-0.733701	-1.20286	0.213226	-0.639908	-0.961311	-0.494768	-1.59308	-0.406625	-1.55554	-1.34345	1.09469	-0.479773	-0.758592	-1.06702	-1.21851	-0.730756	-0.411731	-0.985673
AGCCAGCCAGAAACCG-1_1	Cancer_HGSOC1	1740	982	13.4483	NA	NA	4	4	0.20336	Singlet	Tumor	NK_cell	T	0.309431	-1.29764	-0.790814	-1.00723	-0.782037	-0.914856	-0.676963	-0.76456	0.149453	-0.821735	-0.422681	-1.16186	-1.01472	-0.707259	-0.456779	-0.529213	-0.667347	-0.794155	-0.640424	-1.31632	-1.19312	-0.711862	-0.572154	-1.06671	-1.31271	-0.599662	-1.47898	-1.46006	0.922334	0.271152	-0.524037	-1.1041	-1.39523	-0.278182	-0.852904	-0.221576
AGCCAGCCAGCTACTA-1_1	Cancer_HGSOC1	5717	2160	6.96169	NA	NA	3	3	0.2458	Singlet	Tumor	NK_cell	NK	0.763034	-0.12668	1.06183	0.287217	-0.0969451	-0.131305	1.41331	0.145386	0.227633	-0.030398	-0.449675	0.308812	0.120728	-0.389157	-0.231177	-0.662762	-0.155866	-0.945307	-0.0473236	-0.721337	-0.213716	-0.325308	0.0229229	-0.0914817	-0.238813	-0.429641	-0.776203	-0.12632	-0.0106749	-0.590478	0.22946	-0.261773	0.113831	-0.70527	-0.605705	0.318121
AGCCAGCGTGATGAAT-1_1	Cancer_HGSOC1	4577	1206	19.9257	NA	NA	10	10	0.226348	Singlet	Tumor	B_cell	B	-0.93083	-1.13252	-1.02615	-0.857286	0.372119	-1.03137	-1.24337	-0.690391	-0.571339	-0.872917	-0.675923	-1.46246	-0.642153	-0.877911	-0.50031	-0.736573	-0.688908	-0.783041	-0.580177	-0.966528	-0.677303	-0.576673	-0.419648	-0.40543	0.00730137	-0.00394034	-0.110896	-0.373765	0.907842	-0.854572	-0.782807	-0.694891	-0.865963	-0.629961	-0.511043	-1.19178
AGCCAGCGTTTGGCTA-1_1	Cancer_HGSOC1	3114	1368	14.0976	NA	NA	4	4	0.19275	Singlet	Tumor	NK_cell	T	0.809183	-0.479661	-0.60305	-0.360871	-0.175446	-0.588092	-1.02048	-0.516842	0.253622	-0.840072	-0.34489	-0.759349	-0.691931	-0.41164	-0.364829	-0.126277	-0.146561	-0.141637	-0.566809	-0.722214	-1.42873	0.0552013	-0.127676	0.226956	-0.526764	-0.492248	-0.718802	-1.07661	0.903723	0.217687	-0.327116	-0.747519	-0.593909	-0.45088	-0.785798	-1.28165
AGCCAGCTCATTGAGC-1_1	Cancer_HGSOC1	4889	1982	4.21354	NA	NA	3	3	0.173298	Singlet	Tumor	NK_cell	NK	1.52619	-0.31326	0.663491	-0.553146	-0.789493	-0.461152	0.706173	-0.00449029	0.105218	0.0765035	-0.728224	0.0594357	-0.267763	0.13651	-0.384068	-0.81942	-0.87566	-0.585133	0.21915	-0.398306	-1.02092	0.0539113	0.0668875	0.397606	0.614282	-0.323046	-0.453298	-0.323415	0.443852	0.500244	-0.30624	0.00504011	-0.0624707	-0.0493103	0.0511685	1.57711
AGCCAGCTCCTAGCCT-1_1	Cancer_HGSOC1	3267	1691	3.67309	NA	NA	5	5	0.207781	Singlet	Tumor	T_cells	CD8T	-0.657337	-0.805464	0.334227	-0.512198	-0.400077	-0.721332	-0.997607	-0.0550137	-0.480086	-0.513138	-0.877645	-0.321367	-0.500008	0.146119	-0.3946	-0.029861	-0.350229	-1.14425	0.166237	-0.81427	-0.51659	-0.630649	-0.196278	0.228831	-0.127661	-0.0341589	0.868863	0.515124	0.590163	-0.944186	0.0179715	-0.418456	-0.707924	-0.26802	-0.306472	-1.11219
AGCCAGCTCTAGTGAC-1_1	Cancer_HGSOC1	18540	3916	15.3506	NA	NA	1	1	0.320955	Singlet	Tumor	Macrophage	myeloid	-0.271093	0.921065	1.3876	0.223072	0.724462	1.07637	0.357003	1.57393	-0.0487093	1.06669	1.27395	2.21017	0.563297	0.308294	0.21295	0.534323	0.689093	0.881075	0.673382	0.464304	1.51002	1.08122	2.0233	2.2188	2.7972	3.38715	2.30897	2.16147	-1.43526	2.83423	0.830776	1.25524	0.637814	0.645243	-0.291674	1.74721
AGCCAGCTCTTCTGGC-1_1	Cancer_HGSOC1	5829	2220	7.15389	NA	NA	3	3	0.15473	Singlet	Tumor	NK_cell	NK	-0.505013	0.00826716	1.19792	0.353927	-0.744259	-0.23951	0.602975	-0.00169097	-0.490274	0.322475	-0.93243	0.339011	0.0331755	-0.130273	-0.375203	-0.169038	-0.333228	0.243397	-0.331	-0.0791513	-1.5419	-0.447978	0.108757	1.55728	0.0450224	0.433699	-0.458451	-0.123984	0.0213699	-0.410837	0.0590556	-0.0247784	0.39653	0.0541643	-0.14097	0.913794
AGCGATTAGTGATTCC-1_1	Cancer_HGSOC1	17036	4725	11.3113	NA	NA	14	14	0.220159	Singlet	Tumor	Smooth_muscle_cells	mesenchymal	-1.40482	0.937638	0.0563814	1.42324	2.7172	1.82519	1.41538	1.7113	-0.00799197	0.181476	0.942613	0.163518	0.635558	0.487035	2.40746	0.967058	0.34115	0.614719	0.639552	1.01163	1.17627	0.674901	1.56758	2.14055	0.459896	0.185159	-0.412804	-0.345039	-1.08625	1.02842	1.64052	0.958614	1.10164	0.459876	1.47409	3.01018
AGCGATTAGTGTAGAT-1_1	Cancer_HGSOC1	34524	2718	2.46495	NA	NA	15	15	0.217507	Singlet	Tumor	B_cell	B	-0.47765	0.283764	-0.273147	0.536126	-0.800033	-0.150482	-1.0212	-0.409499	-0.660132	-0.192639	0.0886881	-0.0474591	0.392106	-0.468111	-0.270086	-0.0481182	-0.247542	0.895148	-0.39378	1.09763	-1.06848	0.579106	-0.123993	-0.561458	-0.671067	-0.448957	-0.354659	-0.171465	-0.741123	-0.868753	-0.443518	0.606983	0.293853	0.179732	-0.215919	-0.728729
AGCGATTCAGCCGGTT-1_1	Cancer_HGSOC1	2990	964	18.9632	NA	NA	1	1	0.304156	Singlet	Tumor	Monocyte	myeloid	0.0241497	-0.952281	-0.828719	-0.961754	0.564536	-1.22731	0.294905	-0.51028	-1.39442	-0.616559	-0.320274	-0.620567	-0.926508	-0.517424	-0.309134	-0.189892	-0.590876	-1.00088	-0.683429	-0.917804	-0.532956	-1.1803	-0.467861	-0.36799	-0.825131	0.483545	-0.989362	-1.12474	0.59983	0.806583	-0.663801	-1.04609	-1.17622	-0.377218	-0.389503	-1.05801
AGCGATTGTTTCCATT-1_1	Cancer_HGSOC1	82745	6540	5.54958	NA	NA	15	15	0.219275	Singlet	Tumor	NK_cell	B	-1.05438	1.44413	2.06714	2.07308	-0.291191	1.08684	1.73855	1.6457	0.30385	2.12331	0.000492565	1.92585	2.34428	2.99584	-0.384669	1.02877	1.12123	1.44347	2.97258	0.993667	-0.615455	1.76961	0.919196	1.76617	1.57639	0.508552	0.578153	1.23827	-1.21854	0.117716	2.13287	1.99229	1.91907	1.83095	0.282579	-1.15556
AGCGATTTCGGCATAT-1_1	Cancer_HGSOC1	4216	1625	12.1679	NA	NA	3	3	0.181256	Singlet	Tumor	NK_cell	NK	0.324765	-0.595303	0.551843	-0.357633	0.286547	-0.448411	0.637287	-0.266907	-1.02424	-0.761736	-0.969812	-0.579572	-0.719265	-0.582429	-0.325855	0.160648	-0.215497	-0.449962	-0.417428	-0.899387	-0.976665	-0.667978	-0.845278	0.176857	-0.0689689	0.196074	-0.41058	-0.542368	-0.0227919	0.228961	-0.159607	-0.46323	-0.448722	-0.509222	0.0497143	-0.994281
AGCGCCAAGTAAGCAT-1_1	Cancer_HGSOC1	12425	3142	14.3903	NA	NA	12	12	0.313882	Singlet	Tumor	Monocyte	B	0.846208	0.267747	0.809034	1.1208	0.792672	0.220172	-0.186758	0.108785	1.04376	0.628216	-0.031851	0.532389	0.510025	0.189224	-0.616593	-0.482535	-0.432996	0.381464	-0.0529719	-0.56129	-0.362465	0.139562	0.165171	1.22479	2.10031	0.110807	0.208983	0.246259	-0.562419	1.09504	-0.106708	0.63344	0.589028	-0.307723	0.219577	0.497692
AGCGCCACAGAGTCAG-1_1	Cancer_HGSOC1	8447	3131	6.92554	NA	NA	11	11	0.222812	Singlet	Tumor	Endothelial_cells	endothelial	2.71596	0.147486	-0.895124	0.217465	1.95232	1.44376	1.83465	0.0685044	0.0502485	0.145235	1.66594	0.411388	0.473916	-0.153493	0.870745	0.181768	-0.118716	-0.228382	0.34796	0.115105	2.12555	0.892238	0.662209	0.882647	0.53939	-0.464169	-0.523273	-0.739999	-0.862459	-0.0173519	0.502386	0.190188	-0.368898	-0.843565	1.63902	0.265602
AGCGCCACAGATACTC-1_1	Cancer_HGSOC1	44655	6412	18.7079	NA	NA	0	0	0.299735	Singlet	Tumor	Epithelial_cells	epithelial	0.110535	1.95349	-0.87703	1.61214	-0.177828	1.41753	1.88667	1.69545	0.852048	2.47587	1.21611	0.595851	1.55359	0.82948	0.231845	2.79791	2.44188	1.46167	1.02457	0.663233	0.0619642	2.28295	0.89504	1.24366	0.105503	0.381308	0.194376	0.146776	-1.30136	-0.690995	1.45704	1.40903	1.56892	2.59256	1.41776	0.534022
AGCGCCAGTGTTACAC-1_1	Cancer_HGSOC1	4576	1608	19.7334	NA	NA	1	1	0.303271	Singlet	Tumor	Macrophage	myeloid	-1.08105	-0.820801	-0.15115	0.125924	-0.765597	-0.864585	0.0396855	-0.537599	-1.06981	-0.619742	-0.25178	-0.272456	-0.776302	-0.512591	-0.703953	-0.315132	-0.78852	-1.12234	-0.109487	-0.812709	1.53481	-0.310734	-0.0589069	-0.483624	0.0473735	1.13439	-0.360243	-0.068637	1.28776	0.422003	-0.125694	-0.548268	-0.931368	-0.903961	-0.445732	0.331221
AGCGCTGAGAAGAACG-1_1	Cancer_HGSOC1	10525	3103	13.9287	NA	NA	1	1	0.28824	Singlet	Tumor	Monocyte	myeloid	0.272415	0.236692	1.85519	-0.423482	-0.298675	-0.112496	0.60671	0.995096	-0.57952	-0.210326	0.46326	1.23188	0.434715	0.134441	-0.25862	0.00777454	0.0383719	-0.0851804	0.155364	-0.388345	0.86426	0.129233	0.845619	1.41429	0.627811	1.62041	0.619713	1.26926	0.17966	1.90925	-0.307633	0.165071	0.146454	-0.161888	0.289735	0.0708117
AGCGCTGCAGTGAGCA-1_1	Cancer_HGSOC1	7291	2571	13.0298	NA	NA	3	3	0.167993	Singlet	Tumor	NK_cell	NK	-0.394018	-0.0634675	1.49054	0.120356	-1.06103	0.152293	0.274356	-0.549497	-0.974183	-0.699436	-0.983736	-0.205968	0.021977	0.224787	-0.846127	-0.146032	-0.549725	-0.683458	0.382319	-0.450457	-1.2656	-0.656363	-0.00401008	1.13886	0.0456773	0.421114	-0.724052	0.0994709	-0.181216	0.745951	0.248097	0.0723883	0.575739	1.98477	-0.796078	-0.399878
AGCGCTGGTATCGTGT-1_1	Cancer_HGSOC1	22314	5839	9.29013	NA	NA	0	0	0.305924	Singlet	Tumor	Epithelial_cells	epithelial	-0.992738	1.47373	-0.563118	1.88461	0.881009	1.8554	1.4309	1.36469	0.622728	1.52631	0.764916	0.764712	1.14958	0.969997	-0.184418	2.12921	2.05456	0.993961	1.00855	0.954152	1.5883	0.840162	1.5547	0.566384	0.902942	-0.199206	0.503955	0.772629	-1.28527	0.0106647	1.84421	1.47939	1.37686	0.771419	1.29432	2.07538
AGCGCTGGTGACCGTC-1_1	Cancer_HGSOC1	4239	1340	18.0939	NA	NA	1	1	0.29443	Singlet	Tumor	Monocyte	myeloid	0.133551	-0.909173	-0.046256	-0.696908	-0.639837	-0.606092	-1.32119	0.0889139	-0.454173	-0.746244	0.305741	-0.263955	-1.18589	-0.428332	-0.348175	-0.124973	-0.300017	-0.924111	-0.196494	-0.807265	-0.465178	-0.32849	-0.489892	-0.119546	0.536722	1.40793	-0.934218	-0.476895	0.685208	-0.0193231	-0.843156	-0.412724	-0.927711	-0.280296	-0.266965	-0.996276
AGCGCTGGTGGCTAGA-1_1	Cancer_HGSOC1	7504	2381	24.6935	NA	NA	1	1	0.298851	Singlet	Tumor	Macrophage	myeloid	-0.489144	-0.176522	0.766712	0.106932	0.131102	-0.298217	-0.801449	-0.201646	-2.13788	0.124828	1.04178	0.423489	-0.677925	-0.692952	-0.0852973	-0.50024	-0.291572	-0.539176	-0.407799	-0.631059	-0.813433	0.550662	-0.195105	0.210314	0.683989	1.19464	-0.847159	-0.400435	-0.41666	2.07533	-0.328596	-0.337218	-0.769749	-0.920973	0.0561258	-0.645375
AGCGCTGTCACCCTGT-1_1	Cancer_HGSOC1	4359	1655	13.1911	NA	NA	2	2	0.249337	Singlet	Tumor	T_cells	CD4T	0.437674	-0.00334905	0.0926166	-0.982544	-0.441917	-0.562544	-0.294102	-0.301066	1.05825	-0.292775	-1.05706	-1.11516	-0.0729588	-0.262348	-0.527776	-0.658805	-0.830831	-0.125939	0.0417206	-0.383404	1.30465	-0.524749	-0.0672751	-0.0110219	-0.474085	-0.0289808	-0.682984	-0.425345	0.764254	0.21262	-0.298458	-0.37274	-0.1732	-0.176332	-0.423247	-0.794267
AGCGTATAGACGATAT-1_1	Cancer_HGSOC1	3642	1608	8.64909	NA	NA	5	5	0.229001	Singlet	Tumor	NK_cell	CD8T	-0.36269	-0.688513	0.319721	-0.992591	-0.542362	-0.443397	-0.12266	-0.548966	-0.247525	0.211605	-0.696539	-0.174284	-0.547112	-0.402482	-0.47186	-0.982589	-0.885995	-0.85778	-0.537596	-1.14227	-0.20586	-0.727416	-0.824482	-0.114275	0.309918	0.0630768	-0.643628	-0.323275	0.590946	0.148559	-0.0685891	-0.808798	-0.674849	-1.03273	-0.654293	0.0253047
AGCGTATAGGTAGGCT-1_1	Cancer_HGSOC1	10820	4008	12.366	NA	NA	0	0	0.300619	Singlet	Tumor	Epithelial_cells	epithelial	0.524745	0.871848	-0.859841	0.948809	0.489487	0.889022	1.93809	0.904473	-0.000627886	1.32721	0.933021	-0.0700194	0.645042	2.53659	0.196037	0.725736	1.41323	0.215544	2.16432	0.184454	-0.12762	0.83654	0.0877081	-0.907703	-1.08995	-0.447774	-0.631557	-0.84724	-0.291594	-1.11286	2.10638	0.811799	0.652382	0.338764	0.770828	1.68293
AGCGTATAGTCTACCA-1_1	Cancer_HGSOC1	10397	2836	11.2052	NA	NA	1	1	0.265252	Singlet	Tumor	Macrophage	myeloid	1.62327	0.645197	0.660207	1.12853	0.634467	0.50428	-0.0443372	0.756514	-0.501397	1.25411	2.1374	2.33556	0.0561757	-0.14317	0.0167941	0.207765	0.322332	0.315867	0.276663	-0.196105	1.39361	0.356028	1.14176	1.59692	1.02869	2.22899	1.36442	1.41451	-0.432539	1.44509	0.210348	0.702491	0.276518	-0.052685	-0.174743	1.23249
AGCGTATGTATGTCCA-1_1	Cancer_HGSOC1	7599	2479	18.2261	NA	NA	1	1	0.218391	Singlet	Tumor	Macrophage	myeloid	0.531992	-0.237874	0.862408	-0.179448	-0.038484	-0.173703	-0.907829	0.324765	-0.54669	0.416673	1.13223	1.25031	-0.423069	-0.656057	-0.481993	0.161689	0.0911911	-0.669225	-0.14686	-0.282432	-0.426492	0.153749	0.422947	0.528107	0.991268	2.27367	0.362501	0.262035	0.330898	2.37709	0.745204	0.179913	-0.060079	-0.559539	-0.722919	0.27568
AGCGTATGTTGTAAAG-1_1	Cancer_HGSOC1	13414	4143	18.1079	NA	NA	0	0	0.30504	Singlet	Tumor	Epithelial_cells	epithelial	1.55658	0.467586	-1.22559	0.677429	1.22521	1.02704	-0.606896	0.875629	0.882599	0.657107	1.09752	-0.138703	0.629556	0.504845	-0.221869	1.45495	0.985926	0.17294	0.638009	0.274503	1.52378	1.22272	0.36566	0.271043	-0.283432	-0.701538	-0.369804	-0.595013	-1.43357	-1.45719	0.953541	0.410504	1.03989	0.661549	0.909992	1.15974
AGCGTCGAGATCCTAC-1_1	Cancer_HGSOC1	1824	946	10.6908	NA	NA	3	3	0.197171	Singlet	Tumor	NK_cell	NK	0.0121909	-1.07071	-0.262845	-1.42207	-0.895904	-0.707685	0.958995	-1.42401	-0.323946	-1.1272	-0.631884	-0.669222	-0.482758	-0.577675	-0.550216	-0.721112	-1.05835	-1.06048	-0.910832	-0.876364	-1.19901	-0.606515	-1.00074	-0.97338	-1.23003	-0.461209	-0.485477	-0.812814	1.28237	-0.289309	-0.821541	-0.839585	-0.759042	-1.05217	-0.490491	-0.384545
AGCGTCGAGGCTGGAT-1_1	Cancer_HGSOC1	754	405	1.19363	NA	NA	0	0	0.228117	Singlet	Tumor	Pre-B_cell_CD34-	epithelial	0.767747	-0.858768	-1.32093	-1.12258	-0.309076	-1.22978	-0.800845	-1.33935	0.47409	-0.955235	-0.124915	-1.03911	-1.00835	-1.16015	-0.492292	-0.490251	-0.461705	-0.912005	-1.27173	-0.684269	-0.897537	-1.18057	-1.29083	-1.79553	-1.24517	-0.46484	-1.39056	-1.59324	0.985394	-0.824344	-1.31597	-1.40891	-1.49501	-0.985688	-0.768515	-0.325692
AGCGTCGCAAGTGGAC-1_1	Cancer_HGSOC1	1970	1000	13.2995	NA	NA	2	2	0.230769	Singlet	Tumor	T_cells	CD4T	0.647332	-1.19443	0.119141	-0.688809	-0.475081	-0.688466	0.481546	-0.706999	-1.14222	-0.885339	-0.796984	-0.529861	-0.83118	-0.946664	-0.254404	-0.376664	-0.799037	-1.14976	-1.08443	-0.512638	-0.603836	-0.487994	-0.640285	-0.486439	-0.405508	-0.157258	-1.12394	-1.18427	1.08002	0.441713	-0.895735	-0.719638	-1.0211	-0.437409	-0.751343	-0.917361
AGCGTCGCATGTGTCA-1_1	Cancer_HGSOC1	19921	4272	22.6244	NA	NA	0	0	0.323607	Singlet	Tumor	Epithelial_cells	epithelial	0.847218	1.10739	-0.756737	0.502747	0.874145	1.62061	-0.133876	0.849693	-0.0879163	0.804842	1.39213	-0.164554	0.817325	0.50839	0.223385	2.06543	2.60808	0.890894	0.446997	1.19291	1.19294	1.31444	1.1263	0.236336	0.0741101	-0.0777907	-0.264535	-0.318755	0.295544	-1.22804	0.82456	0.78959	1.23053	1.31839	2.1849	-0.570112
AGCTACAAGCCAGACA-1_1	Cancer_HGSOC1	20532	4391	6.55075	NA	NA	1	1	0.247569	Singlet	Tumor	Monocyte	myeloid	-0.0336882	1.25997	1.50431	1.12931	-1.25338	0.27859	-0.437871	1.66285	-1.18766	0.836063	0.98511	2.38865	0.551732	0.324002	-0.444201	0.417507	0.775233	1.21433	0.80614	0.46004	1.53049	1.22498	1.25781	1.89627	2.90315	2.81473	1.80551	2.34172	-1.32907	1.98692	1.07938	0.618777	0.675439	0.422572	0.0358637	0.804224
AGCTACAAGGTGCCTC-1_1	Cancer_HGSOC1	3601	1594	6.94252	NA	NA	5	5	0.229885	Singlet	Tumor	T_cells	CD8T	0.439342	-0.58967	0.0253098	-0.49492	-0.858092	-0.43415	-0.489651	-1.04201	0.303927	-0.648144	-0.678992	-0.463901	-0.344448	-0.460223	-0.572021	-0.86128	-0.611894	-0.431478	-0.384606	-0.882786	-1.13314	-0.401552	-0.659403	-0.318871	-1.06096	-0.86234	-0.837288	-0.864701	0.11206	-0.381397	-0.267433	-0.41626	-0.133822	-0.0573703	-0.478447	-0.283075
AGCTACAAGTAAACGT-1_1	Cancer_HGSOC1	4420	1575	10.6787	NA	NA	2	2	0.207781	Singlet	Tumor	T_cells	CD4T	1.43701	-0.630489	0.098841	-0.375673	-0.627945	-0.364405	-0.592894	-0.0412237	-0.357685	-0.497049	-0.604045	0.0181847	-0.366643	-0.373359	-0.139565	-0.0539019	-0.330493	-0.461869	-0.30774	-0.447728	-0.740834	-0.523979	0.118964	0.0814006	-0.734743	0.154606	0.480111	0.530567	0.40647	0.440842	-0.673873	-0.603809	-0.219701	-0.0426166	-0.59183	-0.0478906
AGCTACACAGGCCTGT-1_1	Cancer_HGSOC1	5568	2244	4.5977	NA	NA	3	3	0.194518	Singlet	Tumor	NK_cell	NK	-1.24594	-0.228523	0.406006	-0.261125	-0.904165	-0.56391	-1.51968	-0.0941267	1.14843	-0.0536948	-0.964468	-0.216362	-0.256736	-0.52539	-0.28965	-0.515424	-0.202318	0.242256	0.00889883	-0.646612	-0.0973399	0.0448588	0.465351	1.1931	0.0759702	-0.456674	-0.137689	0.140329	-0.0521653	-0.27795	0.149282	0.0641913	0.202155	-0.411608	-0.150874	-1.01338
AGCTACAGTAGCGCTC-1_1	Cancer_HGSOC1	4332	1856	5.44783	NA	NA	3	3	0.190981	Singlet	Tumor	NK_cell	NK	0.78125	-0.9835	0.550809	-0.140535	-0.205694	-0.740146	-0.140972	-0.216486	-1.08827	-1.15296	-0.806988	-0.685296	-0.5164	-0.286551	-0.235089	-0.245199	-0.334333	-0.85199	-0.0731531	-0.50863	-0.00817239	-0.477033	-0.442433	-0.0516358	-0.450419	0.264631	-1.00874	-0.213495	-0.267629	1.39275	-0.418034	-0.390712	-0.220027	-0.356302	-0.431702	-0.486011
AGCTACAGTATGGAAT-1_1	Cancer_HGSOC1	6397	2634	9.52009	NA	NA	7	7	0.223696	Singlet	Tumor	T_cells	CD8T	-0.846875	-0.360452	1.13876	0.0406806	-1.28158	-0.203567	1.33943	-0.238963	-0.335847	-0.0635966	-1.24469	-0.0329051	0.462322	2.18586	-0.697777	0.0910165	0.175704	-0.345214	2.12028	-0.152812	0.421687	-0.142325	-0.389217	0.249804	-0.578747	-0.0629349	0.470212	0.234379	0.520698	-1.31005	1.2819	0.507363	0.653863	0.638093	-0.589723	0.663711
AGCTACATCCCAGTGG-1_1	Cancer_HGSOC1	3748	1554	10.3522	NA	NA	3	3	0.238727	Singlet	Tumor	NK_cell	NK	-0.375617	-0.992442	0.264111	-0.986571	-0.0882907	-0.796513	-0.121211	-0.759112	0.557222	-0.377315	-0.927053	-0.392565	-0.467135	-0.377996	-0.449901	-0.418137	-0.655275	-0.178611	-0.462753	-0.554504	-0.190822	-0.881232	-0.174185	0.13257	-0.43412	0.00425208	-0.0698725	-0.130566	0.765969	-0.0119098	0.050198	-0.405127	-0.409882	-0.024178	-0.759067	-1.63663
AGCTACATCCTACGGG-1_1	Cancer_HGSOC1	2043	998	15.4674	NA	NA	4	4	0.200707	Singlet	Tumor	NK_cell	T	0.204621	-1.22739	-0.3308	-0.7893	0.198895	-0.496636	1.14151	-0.761424	-1.55824	-0.791137	-0.857116	-1.04501	-1.15139	-0.583107	-0.408921	-0.354262	-0.754253	-0.597458	-0.950042	-1.09496	0.211181	-0.897756	-1.13092	0.0516543	-1.06744	-0.389995	-1.29206	-1.06669	0.601347	-0.100374	-0.301327	-1.22528	-1.30539	-0.152591	-0.640752	-1.04378
AGCTACATCGAAGAAT-1_1	Cancer_HGSOC1	1033	667	8.61568	NA	NA	4	4	0.212202	Singlet	Tumor	NK_cell	T	-0.398381	-0.971858	-0.999869	-0.786673	-0.753942	-0.778966	-1.28184	-0.670848	-0.50912	-0.713706	-0.259197	-0.612977	-0.897899	-1.0454	-0.358465	-0.843576	-0.951016	-1.09881	-0.961067	-1.11396	-0.311234	-0.754256	-0.973603	-0.981699	-1.08814	-0.807185	-1.40654	-1.29041	1.07184	-0.55364	-0.791416	-1.04457	-1.71129	-1.03841	-0.321985	-0.427459
AGCTACATCTGGAAGG-1_1	Cancer_HGSOC1	10869	2978	5.7319	NA	NA	1	1	0.26702	Singlet	Tumor	Monocyte	myeloid	-1.08178	0.438218	1.15485	-0.416538	0.873537	0.0743216	-0.456915	1.14035	-0.14047	0.856423	1.30363	0.856778	0.259494	-0.100256	-0.177477	-0.180607	-0.211297	0.0849684	-0.169168	0.332059	-0.445409	0.156721	0.879822	0.730195	0.977315	1.76035	0.280799	0.895885	-0.415053	1.34343	-0.423154	0.352329	0.168349	-0.194526	0.435064	0.770221
AGCTCAAAGAGGGTGG-1_1	Cancer_HGSOC1	19150	3528	18.9922	NA	NA	1	1	0.284704	Singlet	Tumor	Macrophage	myeloid	-0.586505	0.821531	1.54184	0.219631	0.674071	0.480845	0.18818	1.04918	-0.903268	0.114899	1.65142	2.07589	0.364515	-0.032779	0.375523	0.696537	0.484385	0.316465	0.313923	0.622015	1.60669	0.252718	1.99575	1.27087	2.43029	3.03977	0.505454	1.25502	-1.34727	3.09535	0.791461	0.995269	0.819504	0.574323	0.437738	2.18627
AGCTCAAAGGTTGAGC-1_1	Cancer_HGSOC1	3255	1446	8.57143	NA	NA	5	5	0.218391	Singlet	Tumor	T_cells	CD8T	-0.608532	-0.712614	0.836897	-0.453647	-1.00793	-0.491965	-0.730034	-0.637131	0.0720335	-0.374385	-1.02978	-0.805654	-0.599704	-0.400812	-0.351896	-0.346651	-0.0194274	-1.11218	-0.411045	-0.720722	-1.07444	-0.881541	-0.88113	-0.706449	-0.653231	-0.20293	-0.69613	-0.0642622	0.288147	-0.270026	-0.711414	-0.643731	-0.967206	-0.324765	-1.06066	-1.19164
AGCTCAAAGTCTTGGT-1_1	Cancer_HGSOC1	2635	1238	12.1442	NA	NA	5	5	0.200707	Singlet	Tumor	T_cells	CD8T	1.22713	-0.678012	0.018352	-0.608838	-0.700827	-0.491542	-0.252105	-0.949609	0.285176	-1.0542	-0.689412	-0.133286	-0.701694	-0.544359	-0.699985	-0.679941	-0.940478	-0.934302	-0.705792	-0.784276	0.0171194	-0.326927	-0.791632	-0.660128	-0.15184	-0.292265	-1.11897	-0.91977	0.0695665	0.176051	-0.34522	-0.842984	-0.991352	-0.611596	-0.320516	-0.487064
AGCTCAACAATACCCA-1_1	Cancer_HGSOC1	16143	2240	3.38847	NA	NA	8	8	0.217507	Singlet	Tumor	B_cell	B	-0.566425	-0.320535	-0.574049	0.641327	-0.226691	-0.789793	-0.185619	-0.270393	-0.649266	-1.07237	-0.664766	-0.708638	-0.451817	-0.39722	-0.743789	0.314602	-0.132874	-0.0267368	0.196298	-0.347927	-0.808583	0.866832	-0.222834	-0.306097	-0.739949	-1.3269	-1.29286	-0.849889	-0.270733	-1.17765	-0.27992	0.412414	0.0595234	-0.333804	-0.545625	-0.971668
AGCTCAAGTGCAGTGA-1_1	Cancer_HGSOC1	3955	1626	5.33502	NA	NA	3	3	0.183024	Singlet	Tumor	NK_cell	NK	-0.889358	-0.625298	0.549552	-0.857365	-0.766563	-0.23539	-0.0754319	-0.0611251	-0.554369	-0.470458	-0.312373	-0.0294013	-0.626603	-0.397568	-0.273144	-0.521296	-0.415466	-0.829558	-0.412936	-0.488032	0.0277309	-0.631412	0.108557	-0.302496	0.209755	0.325466	-1.24833	-0.45125	0.747435	0.573559	-0.218794	-0.556241	-0.366577	-0.978189	-0.00974965	-1.25227
AGCTCAATCCAAGCAT-1_1	Cancer_HGSOC1	4864	2116	9.14885	NA	NA	3	3	0.221927	Singlet	Tumor	NK_cell	NK	0.519196	-0.677942	0.667436	0.494357	-0.439421	-0.453275	0.176399	0.122642	-1.46906	-0.720738	-0.195082	0.231769	-0.503597	0.0664143	0.0242197	0.51957	-0.398038	-0.42995	0.31169	-1.37345	-0.685973	0.133022	-0.450252	0.247814	0.333196	0.208121	0.449686	0.258318	0.722305	0.68218	0.395979	0.0411107	-0.247741	-0.615106	-0.229981	-1.21644
AGCTTCCAGATGTTCC-1_1	Cancer_HGSOC1	26985	5427	19.0143	NA	NA	0	0	0.325376	Singlet	Tumor	Epithelial_cells	epithelial	1.15847	1.22887	-0.818034	1.33615	1.38097	1.3042	1.04084	1.36508	0.489561	1.13914	0.710539	0.0744678	0.631012	0.811638	-0.167574	2.14805	1.62817	0.429219	0.936956	0.674043	1.86835	1.63712	0.721852	-0.587707	0.674433	-0.38768	-0.00140314	0.437278	-0.906459	-1.53914	1.64383	0.735325	1.13529	1.9952	1.33234	0.608029
AGCTTCCAGCACCCAC-1_1	Cancer_HGSOC1	4929	1939	8.03408	NA	NA	3	3	0.158267	Singlet	Tumor	NK_cell	NK	-0.972539	-0.160918	0.562819	-0.327508	-0.773757	-0.114066	-0.178736	-0.574046	0.607125	-0.543905	-1.12884	-0.28585	-0.460937	-0.24533	-0.163347	-0.631509	-0.601448	-0.748993	-0.283262	-0.572558	-1.11157	0.431803	0.204008	-0.270665	0.15587	0.301568	-0.884236	-0.579177	1.04098	-0.173537	0.0507598	-0.50785	-0.437073	-0.116268	-0.02881	-0.691825
AGCTTCCAGGATACAT-1_1	Cancer_HGSOC1	6902	2349	9.7508	NA	NA	3	3	0.157383	Singlet	Tumor	NK_cell	NK	-0.365821	-0.0913759	0.727721	0.00517784	-0.785453	-0.233411	1.84813	0.0214007	-0.698607	0.328691	-0.443853	0.231033	-0.508724	-0.125812	-0.470674	-0.192774	0.265977	0.413313	0.118796	-0.261519	-0.314575	-0.314321	0.0162941	1.17831	-0.393045	-0.218565	-0.745041	-0.595634	-0.323712	0.569486	-0.164688	0.287725	0.327881	0.370008	-0.453629	-1.10301
AGCTTCCAGGCATGGT-1_1	Cancer_HGSOC1	1322	553	1.5885	NA	NA	0	0	0.230769	Singlet	Tumor	Pre-B_cell_CD34-	epithelial	0.579439	-0.539836	-1.31235	-1.2114	0.158112	-0.688843	-0.248067	-1.26685	0.203936	-0.483309	-0.264328	-1.28723	-1.05803	-0.956621	-0.636413	-0.714431	-0.59214	-0.613225	-0.949491	-0.582221	-0.693544	-0.808441	-1.13956	-1.76577	-1.34569	-0.600378	-1.35118	-1.66272	1.04655	-0.327366	-1.12436	-1.07529	-1.0891	-1.00747	-0.553569	-0.871366
AGCTTCCAGGCGAAGG-1_1	Cancer_HGSOC1	3889	1303	19.6966	NA	NA	1	1	0.304156	Singlet	Tumor	Monocyte	myeloid	-0.9791	-0.979011	0.128695	-0.661935	1.39521	-0.67598	-0.290368	-0.18376	-0.449372	-0.247605	0.615985	0.415643	-0.850545	-0.802918	-0.165394	-0.461092	-0.721408	-1.00002	-0.779733	-1.01038	-0.822352	-0.498872	-0.437952	0.0786581	0.985233	1.21761	0.10363	0.20797	0.514326	2.27945	-0.713591	-0.687048	-1.0906	-0.630722	-0.00445048	1.29645
AGCTTCCCAAACTCGT-1_1	Cancer_HGSOC1	2381	1000	7.60185	NA	NA	4	4	0.194518	Singlet	Tumor	T_cells	T	-0.717241	-0.74331	-0.725584	-0.928013	-0.278333	-0.691692	-0.349682	-0.615002	0.128574	-1.14276	-0.577321	-1.45248	-1.06075	-0.679485	-0.195403	0.0801192	-0.538322	-0.927601	-0.785244	-0.749546	-0.488254	-1.23221	-0.227902	-0.785443	-0.669623	-0.717886	-1.32257	-1.22704	0.991826	-0.237308	-0.676969	-1.05257	-1.19233	-0.356975	0.69101	-0.322466
AGCTTCCCAAGCGCTC-1_1	Cancer_HGSOC1	4931	1318	0.709795	NA	NA	0	0	0.274978	Singlet	Tumor	Epithelial_cells	epithelial	0.268387	-0.368064	-0.922684	-0.598244	-0.95307	-0.386501	-0.377042	-0.689975	0.863901	0.192522	0.0155617	-0.956531	-0.159707	-0.936953	-0.391548	-0.58732	-0.627842	-0.00561347	-0.806455	-0.541918	0.173892	-0.417688	-0.727868	-1.43509	-1.79886	-1.535	-1.30108	-1.66077	1.37732	-0.952672	-0.982376	-0.574967	-0.168309	-0.433992	-0.939327	-0.565715
[truncated: 27,652 more rows]
[truncated: 15 more columns]

## Sheet: Supplementary Table 2
Supplementary Table 2. NRF2 gene score and Immune gene score of human HGSOC from 365 samples (TCGA) data
Sample	NRF2_Gene Score	Immune_Gene Score			High NRF2 HGSOC
TCGA-13-0730-01A	2.757	0.0536599			Low NRF2 HGSOC
TCGA-23-1809-01A	2.52855	-0.229788
TCGA-24-1416-01A	2.40857	-0.6345
TCGA-59-2354-01A	2.33474	1.59146
TCGA-29-1769-01A	2.28724	0.403964
[truncated: 360 more rows]

## Sheet: Supplementary Table 3
Supplementary Table 3. Differentially expressed genes in high versus low NRF2 HGSOC from RNA-seq data analysis of 365 human HGSOC tumor samples from TCGA
[truncated: 13 more rows]

[truncated: 4 more sheets: Supplementary Table 4, Supplementary Table 5, Supplementary Table 6a, Supplementary Table 6b]
